# Supplementary material for: Comparative transcriptomics reveals PrrAB-mediated control of metabolic, respiration, energy-generating, and dormancy pathways in Mycobacterium smegmatis
Source: BMC Genomics. 2019 Dec 7;20:942. doi: 10.1186/s12864-019-6105-3 (PMC6898941; doi:10.1186/s12864-019-6105-3)
Supplement: Supplementary file 2 — Additional file 2. M. smegmatis DEG data sets. [file 12864_2019_6105_MOESM2_ESM.xlsx]

## Sheet: Table S1 FDL10_mc2155
logFC	logCPM	F	PValue	FDR	gene	locus_tag
-5.69958	8.87934	71.9903	2.28e-17	1.12e-13	MSMEG_3615	MSMEG_3615
-3.70098	11.3174	58.0802	2.61e-14	6.39e-11	MSMEG_0537	MSMEG_0537
-3.57994	10.2521	54.0259	2.04e-13	3.33e-10	MSMEG_3325	MSMEG_3325
-6.36043	7.8421	46.0358	1.19e-11	1.46e-08	MSMEG_3945	MSMEG_3945
4.21291	10.6441	45.0434	1.97e-11	1.74e-08	MSMEG_6761	MSMEG_6761
10.0271	9.02779	44.8881	2.13e-11	1.74e-08	MSMEG_0532	MSMEG_0532
-5.96706	7.83477	44.5081	2.59e-11	1.81e-08	MSMEG_3323	MSMEG_3323
-3.19791	12.8392	41.9032	9.77e-11	5.99e-08	MSMEG_0538	MSMEG_0538
-4.8312	8.36094	41.0121	1.54e-10	8.39e-08	MSMEG_3954	MSMEG_3954
-2.99356	10.44	39.796	2.87e-10	1.41e-07	MSMEG_1112	MSMEG_1112
-2.94962	10.2771	39.0395	4.22e-10	1.88e-07	MSMEG_6081	MSMEG_6081
3.6035	11.6923	38.5191	5.51e-10	2.25e-07	MSMEG_6758	MSMEG_6758
4.09286	9.98302	38.326	6.08e-10	2.29e-07	maf	MSMEG_1811
-5.09779	7.88584	35.2003	3.01e-09	1.06e-06	MSMEG_3944	MSMEG_3944
5.22249	9.2261	34.7735	3.75e-09	1.23e-06	MSMEG_5589	MSMEG_5589
-4.67186	7.7936	32.6216	1.13e-08	3.47e-06	MSMEG_3926	MSMEG_3926
-2.70984	9.89884	30.7017	3.04e-08	8.77e-06	MSMEG_1774	MSMEG_1774
-7.32198	6.40713	30.106	4.13e-08	1.13e-05	MSMEG_0586	MSMEG_0586
3.01023	11.1321	29.7427	4.98e-08	1.29e-05	MSMEG_4757	MSMEG_4757
-4.35886	7.59594	29.4521	5.79e-08	1.42e-05	xfp	MSMEG_3611
3.15257	10.5969	29.295	6.27e-08	1.46e-05	glpK	MSMEG_6759
5.597	8.76333	26.9188	2.14e-07	4.77e-05	MSMEG_5661	MSMEG_5661
4.89166	8.85694	26.6609	2.44e-07	5.21e-05	MSMEG_1392	MSMEG_1392
-2.7582	9.38839	26.4541	2.72e-07	5.55e-05	MSMEG_3942	MSMEG_3942
-4.5508	6.92223	26.0734	3.31e-07	6.41e-05	MSMEG_3928	MSMEG_3928
2.79629	11.9312	26.0214	3.4e-07	6.41e-05	MSMEG_0965	MSMEG_0965
-2.36665	11.6123	25.3828	4.73e-07	8.6e-05	MSMEG_6253	MSMEG_6253
4.22161	9.16409	25.2281	5.13e-07	8.93e-05	MSMEG_6242	MSMEG_6242
9.05027	8.06825	25.1717	5.28e-07	8.93e-05	hemG	MSMEG_2781
-2.67328	9.31894	25.0407	5.65e-07	9.24e-05	MSMEG_3417	MSMEG_3417
-3.71871	8.0044	24.0595	9.4e-07	0.000146057	MSMEG_3941	MSMEG_3941
5.47043	8.57703	24.0322	9.53e-07	0.000146057	MSMEG_0530	MSMEG_0530
-2.41904	9.74675	23.9057	1.02e-06	0.00015124	MSMEG_0536	MSMEG_0536
-3.9085	7.28443	23.6506	1.16e-06	0.000167568	MSMEG_6486	MSMEG_6486
2.77963	10.3803	23.586	1.2e-06	0.000168337	MSMEG_6391	MSMEG_6391
-2.8092	9.08318	23.2321	1.44e-06	0.00019261	MSMEG_3951	MSMEG_3951
-5.81673	6.12242	23.2196	1.45e-06	0.00019261	MSMEG_3384	MSMEG_3384
-2.45443	9.54744	23.1495	1.51e-06	0.000194494	MSMEG_1131	MSMEG_1131
5.52711	8.27451	22.4423	2.18e-06	0.000273719	MSMEG_1767	MSMEG_1767
2.5362	11.2872	22.2394	2.42e-06	0.000296584	MSMEG_1813	MSMEG_1813
-2.31117	13.4764	22.1351	2.56e-06	0.000305494	glgX	MSMEG_6507
4.39557	8.88218	21.5402	3.48e-06	0.000401078	gltD	MSMEG_6458
5.42345	8.27559	21.5208	3.52e-06	0.000401078	MSMEG_1873	MSMEG_1873
-2.8368	8.78286	21.3094	3.93e-06	0.000437605	hybC	MSMEG_2263
-2.18598	10.0158	20.83	5.04e-06	0.000549393	MSMEG_6767	MSMEG_6767
-2.43499	9.30329	20.7741	5.19e-06	0.000553365	MSMEG_0343	MSMEG_0343
-2.23998	13.6382	20.6478	5.55e-06	0.000578485	MSMEG_6467	MSMEG_6467
4.41241	8.72629	20.5837	5.74e-06	0.000585701	MSMEG_5591	MSMEG_5591
2.40276	11.5555	20.429	6.22e-06	0.000609696	MSMEG_6392	MSMEG_6392
-3.35598	8.23214	20.4286	6.22e-06	0.000609696	MSMEG_3948	MSMEG_3948
-2.10173	10.4884	20.3407	6.51e-06	0.000625793	MSMEG_3332	MSMEG_3332
-2.05163	10.9011	19.9923	7.81e-06	0.000736284	MSMEG_1243	MSMEG_1243
2.46046	10.7664	19.891	8.23e-06	0.000761648	groEL	MSMEG_0880
5.15893	8.2799	19.3909	1.07e-05	0.000970998	MSMEG_0529	MSMEG_0529
-2.0838	12.3723	19.3329	1.1e-05	0.000982736	MSMEG_1244	MSMEG_1244
5.12887	8.2928	19.2058	1.18e-05	0.00103154	MSMEG_5682	MSMEG_5682
-4.82269	6.18539	18.984	1.32e-05	0.00113825	MSMEG_5653	MSMEG_5653
-4.22223	6.40545	18.7282	1.51e-05	0.00127904	MSMEG_1940	MSMEG_1940
-3.2924	7.64732	18.4769	1.73e-05	0.00143435	MSMEG_0576	MSMEG_0576
-2.89837	8.50716	18.3988	1.8e-05	0.00146945	cydB	MSMEG_3232
3.39614	8.83581	18.1009	2.1e-05	0.00166773	MSMEG_6459	MSMEG_6459
-1.97121	11.4338	18.095	2.11e-05	0.00166773	MSMEG_1245	MSMEG_1245
4.25942	8.55295	18.0145	2.2e-05	0.00171207	MSMEG_5659	MSMEG_5659
-2.46091	8.96874	17.8801	2.36e-05	0.00179783	MSMEG_1650	MSMEG_1650
2.37322	10.0537	17.8619	2.38e-05	0.00179783	MSMEG_6393	MSMEG_6393
-1.99546	10.3468	17.8154	2.44e-05	0.00181435	MSMEG_3952	MSMEG_3952
-1.94022	10.521	17.7402	2.54e-05	0.00185931	MSMEG_6746	MSMEG_6746
4.99368	8.18876	17.6691	2.64e-05	0.00190166	MSMEG_0133	MSMEG_0133
3.2979	9.05801	17.5749	2.77e-05	0.00196913	MSMEG_0816	MSMEG_0816
2.20051	10.5993	17.3504	3.12e-05	0.00218415	sdhA	MSMEG_1670
-2.07317	9.82701	17.2222	3.34e-05	0.00230354	MSMEG_4121	MSMEG_4121
-2.36508	9.05351	17.1904	3.39e-05	0.00230988	MSMEG_1950	MSMEG_1950
-2.09535	9.62858	17.1475	3.47e-05	0.00233027	MSMEG_0147	MSMEG_0147
2.28947	10.0112	16.8248	4.11e-05	0.00272434	MSMEG_5435	MSMEG_5435
-1.96304	10.0264	16.7712	4.23e-05	0.00276494	MSMEG_6213	MSMEG_6213
-3.93646	6.45275	16.6346	4.55e-05	0.00293215	MSMEG_3230	MSMEG_3230
-2.07318	9.46258	15.8987	6.7e-05	0.0042436	MSMEG_1786	MSMEG_1786
4.85374	7.9434	15.8845	6.75e-05	0.0042436	MSMEG_5681	MSMEG_5681
3.03299	8.83739	15.7012	7.44e-05	0.00461567	MSMEG_6636	MSMEG_6636
-3.17685	6.81402	15.4649	8.43e-05	0.00516444	MSMEG_2270	MSMEG_2270
3.03228	8.87195	15.3681	8.87e-05	0.00536856	MSMEG_4920	MSMEG_4920
-3.07608	7.88699	15.2145	9.62e-05	0.00575198	MSMEG_3934	MSMEG_3934
-1.82235	10.3819	15.1206	0.000101123	0.0059244	lepA	MSMEG_4556
-3.01465	7.74475	15.1132	0.00010152	0.0059244	MSMEG_0351	MSMEG_0351
-3.39758	6.90716	14.9877	0.000108497	0.00625707	MSMEG_3939	MSMEG_3939
2.01601	10.6561	14.7749	0.000121441	0.00692215	MSMEG_1807	MSMEG_1807
7.74149	7.10561	14.7425	0.000123544	0.00696107	MSMEG_6562	MSMEG_6562
-1.76994	11.2046	14.588	0.000134094	0.00746966	MSMEG_1682	MSMEG_1682
-1.90115	9.68327	14.411	0.000147298	0.00811299	MSMEG_1681	MSMEG_1681
-5.49908	5.69518	14.3889	0.000149031	0.0081172	MSMEG_0489	MSMEG_0489
-1.74996	11.0714	14.347	0.000152388	0.00820887	MSMEG_1773	MSMEG_1773
-5.93492	4.94169	14.2617	0.000159447	0.00849574	MSMEG_0585	MSMEG_0585
-2.94481	7.30441	14.1055	0.000173239	0.00913136	MSMEG_5501	MSMEG_5501
2.47099	9.30012	14.0146	0.000181807	0.0094612	MSMEG_0134	MSMEG_0134
-1.84856	9.74256	13.9857	0.000184628	0.0094612	MSMEG_1951	MSMEG_1951
-2.16056	9.01001	13.9692	0.000186251	0.0094612	MSMEG_3233	MSMEG_3233
-1.76584	12.3684	13.9595	0.000187217	0.0094612	MSMEG_0671	MSMEG_0671
-4.85676	5.78652	13.8693	0.000196412	0.00977869	MSMEG_2548	MSMEG_2548
7.56889	7.27684	13.8324	0.000200308	0.00977869	MSMEG_6565	MSMEG_6565
-1.82684	9.75363	13.8273	0.000200854	0.00977869	MSMEG_1782	MSMEG_1782
2.64616	8.96661	13.8131	0.000202367	0.00977869	MSMEG_6760	MSMEG_6760
-1.73322	10.3385	13.793	0.000204545	0.00977869	MSMEG_5580	MSMEG_5580
3.04609	8.69118	13.7846	0.000205468	0.00977869	MSMEG_0194	MSMEG_0194
-2.82075	7.27048	13.6909	0.000215969	0.0101796	MSMEG_5848	MSMEG_5848
-1.82085	13.9785	13.5563	0.000232005	0.0108313	gyrB	MSMEG_0005
-3.32924	6.54828	13.4723	0.00024262	0.0112201	MSMEG_0600	MSMEG_0600
-3.1006	6.99933	13.3385	0.000260559	0.011937	MSMEG_3940	MSMEG_3940
2.93366	9.17376	13.2929	0.000266969	0.0121174	MSMEG_5483	MSMEG_5483
7.55649	6.86721	13.1838	0.000282959	0.0127254	MSMEG_0331	MSMEG_0331
2.17569	9.48349	13.0054	0.000311212	0.0137479	MSMEG_2619	MSMEG_2619
-5.29287	5.60471	12.9963	0.000312729	0.0137479	MSMEG_3385	MSMEG_3385
-1.85035	9.48209	12.988	0.00031411	0.0137479	MSMEG_6768	MSMEG_6768
-5.65527	4.70557	12.8965	0.000329843	0.0143088	MSMEG_1105	MSMEG_1105
4.45061	7.60057	12.8596	0.000336396	0.014465	MSMEG_1382	MSMEG_1382
-5.92186	5.57865	12.838	0.000340315	0.0145063	MSMEG_3953	MSMEG_3953
-1.65102	11.4061	12.7295	0.000360618	0.0152392	MSMEG_2752	MSMEG_2752
2.45067	9.09818	12.5417	0.000398716	0.0167052	MSMEG_5788	MSMEG_5788
4.3966	7.52321	12.5083	0.000405895	0.0168618	MSMEG_0034	MSMEG_0034
-5.76965	4.94368	12.4727	0.000413697	0.0170415	MSMEG_6835	MSMEG_6835
7.30195	7.4355	12.3999	0.000430144	0.0175714	MSMEG_6241	MSMEG_6241
-2.04016	8.97843	12.38	0.000434736	0.0176122	MSMEG_4141	MSMEG_4141
-2.76066	7.42331	12.2057	0.000477285	0.0191775	MSMEG_4500	MSMEG_4500
7.36279	6.84444	12.0696	0.000513399	0.0204181	MSMEG_6906	MSMEG_6906
-1.76788	9.5424	12.0464	0.000519823	0.0204181	MSMEG_1788	MSMEG_1788
-2.78521	7.53468	12.0343	0.000523192	0.0204181	MSMEG_1205	MSMEG_1205
-3.79756	6.22379	12.0285	0.000524823	0.0204181	MSMEG_0722	MSMEG_0722
-2.15432	8.69643	11.8938	0.000564147	0.0217752	MSMEG_4085	MSMEG_4085
3.50429	7.92855	11.8707	0.000571208	0.0218755	MSMEG_0242	MSMEG_0242
-5.78283	5.20134	11.8277	0.000584526	0.0220982	MSMEG_4204	MSMEG_4204
2.1265	9.52183	11.8229	0.000586041	0.0220982	MSMEG_5635	MSMEG_5635
-1.57858	10.7479	11.6214	0.000653014	0.0244357	sucB	MSMEG_4283
7.18211	7.08384	11.5328	0.000684871	0.0253498	MSMEG_3508	MSMEG_3508
-1.56879	11.4976	11.5249	0.000687785	0.0253498	MSMEG_1246	MSMEG_1246
7.17277	7.09888	11.4923	0.000699958	0.0256059	MSMEG_0217	MSMEG_0217
2.59926	8.79216	11.4186	0.00072826	0.0264439	MSMEG_0380	MSMEG_0380
2.01054	9.65148	11.4037	0.000734138	0.0264614	MSMEG_1543	MSMEG_1543
2.26226	9.07694	11.3154	0.000769833	0.0275121	murA	MSMEG_4932
4.21534	7.1804	11.3042	0.000774513	0.0275121	fdhD	MSMEG_0165
-2.84785	6.74026	11.2287	0.000806628	0.0284467	MSMEG_5363	MSMEG_5363
7.18585	6.85027	11.1812	0.000827563	0.0289765	MSMEG_6180	MSMEG_6180
7.2447	6.69163	11.036	0.00089492	0.0311127	MSMEG_1565	MSMEG_1565
-2.61643	7.07037	10.971	0.000926848	0.0318031	MSMEG_5967	MSMEG_5967
-4.79366	5.09736	10.9691	0.000927752	0.0318031	MSMEG_4810	MSMEG_4810
4.11641	7.34977	10.8011	0.00101584	0.0345809	MSMEG_5261	MSMEG_5261
3.60033	7.59523	10.7295	0.00105587	0.0356958	MSMEG_6903	MSMEG_6903
-4.40117	5.50366	10.6287	0.001115	0.0372936	MSMEG_4101	MSMEG_4101
7.06091	6.87852	10.6231	0.00111835	0.0372936	MSMEG_2658	MSMEG_2658
7.16566	6.66603	10.574	0.00114842	0.0380376	MSMEG_0083	MSMEG_0083
-1.53344	10.305	10.5299	0.00117616	0.0386948	MSMEG_1683	MSMEG_1683
-2.25895	8.31717	10.4695	0.00121521	0.0397132	hybA	MSMEG_2262
4.05845	7.19211	10.4087	0.00125588	0.0407702	MSMEG_1395	MSMEG_1395
3.25444	7.97006	10.2851	0.00134278	0.0429227	MSMEG_6272	MSMEG_6272
-2.77909	6.67713	10.2839	0.00134368	0.0429227	MSMEG_4090	MSMEG_4090
-1.47942	10.6615	10.2774	0.00134845	0.0429227	trxB	MSMEG_6933
4.01933	7.65923	10.2553	0.00136465	0.0431582	MSMEG_2074	MSMEG_2074
2.36779	8.87162	10.1845	0.00141802	0.0445584	MSMEG_5058	MSMEG_5058
2.42107	8.64537	10.1589	0.00143785	0.0448939	hypE	MSMEG_2276
3.99908	7.49027	10.1187	0.00146955	0.0455934	MSMEG_1060	MSMEG_1060
-2.41641	7.24734	10.088	0.00149422	0.046067	MSMEG_0185	MSMEG_0185
-1.46538	10.5974	10.0462	0.00152851	0.0468297	MSMEG_1350	MSMEG_1350
3.98799	7.19755	9.99199	0.00157414	0.0479282	uppS	MSMEG_5256
3.99824	7.09688	9.96533	0.00159709	0.0480778	MSMEG_0114	MSMEG_0114
6.99265	6.7137	9.92565	0.00163187	0.0480778	MSMEG_0046	MSMEG_0046
-2.38983	7.50368	9.92213	0.001635	0.0480778	MSMEG_3416	MSMEG_3416
3.96759	7.3453	9.921	0.00163599	0.0480778	ureG	MSMEG_3623
-2.88069	6.71686	9.92028	0.00163664	0.0480778	MSMEG_5271	MSMEG_5271
6.95691	6.78039	9.91886	0.0016379	0.0480778	MSMEG_6239	MSMEG_6239
-1.45774	10.3407	9.7701	0.0017758	0.0518153	katA	MSMEG_6232
3.93338	7.32193	9.74631	0.00179892	0.0521793	MSMEG_3139	MSMEG_3139
-2.06041	8.50769	9.72469	0.00182019	0.0523146	MSMEG_3418	MSMEG_3418
7.04594	6.57169	9.71991	0.00182493	0.0523146	phoP	MSMEG_5872
-4.08111	5.93878	9.69148	0.00185337	0.0528212	MSMEG_3929	MSMEG_3929
3.9047	7.56396	9.59603	0.00195219	0.0551052	MSMEG_4805	MSMEG_4805
6.77511	7.14496	9.58449	0.0019645	0.0551052	MSMEG_3144	MSMEG_3144
1.59306	10.3671	9.58192	0.00196724	0.0551052	ilvC	MSMEG_2374
-1.45336	10.1538	9.5342	0.00201903	0.055874	pyc	MSMEG_2412
2.51517	8.58575	9.53203	0.00202142	0.055874	MSMEG_5660	MSMEG_5660
6.98274	6.59819	9.52527	0.00202888	0.055874	MSMEG_3676	MSMEG_3676
-2.09397	8.25942	9.50182	0.00205496	0.056276	MSMEG_5550	MSMEG_5550
-2.98973	6.59461	9.48116	0.00207822	0.056597	MSMEG_3931	MSMEG_3931
-2.30653	7.24734	9.45613	0.00210676	0.0570572	MSMEG_6557	MSMEG_6557
3.38755	7.28619	9.44357	0.00212123	0.0571333	MSMEG_0854	MSMEG_0854
3.38319	7.59186	9.42606	0.00214158	0.0573662	MSMEG_0670	MSMEG_0670
2.69645	8.39855	9.29987	0.00229414	0.0611189	cyoE	MSMEG_3105
-1.50978	9.85602	9.26017	0.00234439	0.0621201	MSMEG_1513	MSMEG_1513
1.59425	10.3353	9.19689	0.00242679	0.0639578	sucC	MSMEG_5525
-4.18801	5.11412	9.13805	0.00250606	0.0656937	MSMEG_1114	MSMEG_1114
2.65876	8.2615	9.10934	0.00254569	0.0662656	MSMEG_6904	MSMEG_6904
3.85835	6.98728	9.09693	0.00256301	0.0662656	MSMEG_0760	MSMEG_0760
-2.17354	7.93192	9.09306	0.00256843	0.0662656	MSMEG_1222	MSMEG_1222
3.8324	7.09306	9.06882	0.0026027	0.066798	MSMEG_0815	MSMEG_0815
3.81687	7.27832	9.05771	0.00261855	0.0668548	MSMEG_0437	MSMEG_0437
1.61026	9.88777	9.01773	0.00267642	0.0679697	MSMEG_0640	MSMEG_0640
6.87409	6.58046	9.00852	0.00268995	0.0679697	MSMEG_4826	MSMEG_4826
-2.30454	8.03447	8.99745	0.00270629	0.0680319	MSMEG_3943	MSMEG_3943
1.58584	10.2137	8.96189	0.00275944	0.0690141	MSMEG_4527	MSMEG_4527
3.83332	6.96154	8.91182	0.00283611	0.0703758	MSMEG_5005	MSMEG_5005
-1.432	9.94783	8.90764	0.0028426	0.0703758	MSMEG_4618	MSMEG_4618
6.82869	6.58466	8.84714	0.00293834	0.0723807	MSMEG_3281	MSMEG_3281
6.73479	6.73029	8.82834	0.00296876	0.0727643	MSMEG_6725	MSMEG_6725
2.70419	8.2064	8.81167	0.002996	0.0730666	MSMEG_6762	MSMEG_6762
1.60964	9.98703	8.79241	0.00302778	0.0734762	MSMEG_6398	MSMEG_6398
6.86202	6.4858	8.67584	0.00322759	0.0776052	MSMEG_5639	MSMEG_5639
2.08062	8.96037	8.67471	0.00322959	0.0776052	MSMEG_0931	MSMEG_0931
-5.11986	5.63458	8.62815	0.00331315	0.0790576	MSMEG_5663	MSMEG_5663
6.56702	7.10739	8.62313	0.00332229	0.0790576	MSMEG_5502	MSMEG_5502
3.20577	7.96174	8.58847	0.0033861	0.0801867	MSMEG_0136	MSMEG_0136
6.76106	6.5739	8.54363	0.0034705	0.0817904	MSMEG_2663	MSMEG_2663
-2.08182	8.17597	8.50782	0.00353944	0.083016	MSMEG_1322	MSMEG_1322
3.70749	7.18986	8.46967	0.00361441	0.0837356	mutA	MSMEG_3158
1.977	9.00301	8.46321	0.00362726	0.0837356	purM	MSMEG_5798
-1.3999	13.1232	8.46251	0.00362866	0.0837356	MSMEG_5089	MSMEG_5089
-1.38471	12.7147	8.45723	0.00363921	0.0837356	MSMEG_3902	MSMEG_3902
2.7221	7.90545	8.44909	0.00365553	0.0837356	MSMEG_6024	MSMEG_6024
-2.68072	6.55325	8.4187	0.00371711	0.0847502	MSMEG_0512	MSMEG_0512
2.95954	7.8659	8.39241	0.00377125	0.0851534	MSMEG_0059	MSMEG_0059
-2.03021	8.29523	8.38553	0.00378555	0.0851534	MSMEG_4082	MSMEG_4082
-1.36259	12.2279	8.38416	0.00378839	0.0851534	MSMEG_5969	MSMEG_5969
-3.8732	5.54773	8.37655	0.00380428	0.0851534	MSMEG_6836	MSMEG_6836
-3.59541	5.75636	8.32286	0.00391834	0.0870315	cydD	MSMEG_3231
1.99824	8.91511	8.32038	0.00392369	0.0870315	ksgA	MSMEG_5438
6.78312	6.46398	8.28348	0.00400419	0.0884168	MSMEG_4686	MSMEG_4686
6.65391	6.62856	8.26199	0.00405184	0.0890679	MSMEG_1167	MSMEG_1167
6.76858	6.45993	8.22013	0.00414636	0.0907387	gabT	MSMEG_6685
3.66668	7.09236	8.20022	0.00419208	0.0913315	MSMEG_0244	MSMEG_0244
-2.23032	7.31611	8.19095	0.00421354	0.0913929	MSMEG_1680	MSMEG_1680
-2.7813	6.29389	8.16896	0.00426493	0.0917699	MSMEG_6247	MSMEG_6247
-2.27868	7.07031	8.1675	0.00426837	0.0917699	MSMEG_1790	MSMEG_1790
1.751	9.28611	8.14119	0.00433072	0.0924988	MSMEG_6892	MSMEG_6892
-2.10061	8.07847	8.12948	0.00435876	0.0924988	MSMEG_3400	MSMEG_3400
6.49037	6.92324	8.12943	0.00435888	0.0924988	MSMEG_5574	MSMEG_5574
1.492	10.3449	8.10629	0.00441485	0.092939	cobN	MSMEG_3864
6.72596	6.4689	8.10519	0.00441754	0.092939	MSMEG_0210	MSMEG_0210
6.79787	6.36998	8.05452	0.00454275	0.0951648	MSMEG_0546	MSMEG_0546
-1.32225	10.2957	7.99706	0.00468913	0.0978133	iscS	MSMEG_1242
2.89927	7.72029	7.97351	0.00475051	0.0982718	MSMEG_5377	MSMEG_5377
6.75232	6.40044	7.97324	0.00475121	0.0982718	MSMEG_5174	MSMEG_5174
-1.82112	8.64777	7.9389	0.0048422	0.099733	MSMEG_5732	MSMEG_5732
2.10514	8.68989	7.92852	0.00487005	0.0998871	ndk	MSMEG_4627
-3.57215	5.40269	7.85126	0.00508252	0.103811	MSMEG_3366	MSMEG_3366
6.66384	6.45965	7.83987	0.00511463	0.104033	MSMEG_4536	MSMEG_4536
2.23992	8.41809	7.83131	0.00513889	0.104094	MSMEG_5223	MSMEG_5223
3.61894	6.94265	7.80998	0.00519989	0.104897	rnhA	MSMEG_5562
-1.78196	8.57626	7.78791	0.00526377	0.10575	hypB	MSMEG_2271
1.42174	10.4591	7.76815	0.00532163	0.106139	topA	MSMEG_6157
2.57635	8.03337	7.76651	0.00532646	0.106139	MSMEG_6899	MSMEG_6899
6.72122	6.3502	7.73761	0.00541236	0.107415	MSMEG_5434	MSMEG_5434
-3.50901	5.6445	7.70782	0.00550237	0.108761	MSMEG_0575	MSMEG_0575
-1.86674	8.40981	7.6972	0.00553485	0.108963	MSMEG_0270	MSMEG_0270
2.19819	8.52801	7.68713	0.00556579	0.109078	MSMEG_5518	MSMEG_5518
-1.88504	8.31758	7.68085	0.0055852	0.109078	MSMEG_1658	MSMEG_1658
-1.32214	9.8867	7.57926	0.00590873	0.114939	MSMEG_1247	MSMEG_1247
3.04937	7.44418	7.56411	0.00595856	0.11545	MSMEG_3280	MSMEG_3280
1.8967	9.00426	7.51003	0.00614006	0.118498	MSMEG_0135	MSMEG_0135
-1.30901	9.95833	7.46708	0.00628823	0.120179	bfr	MSMEG_3564
6.64292	6.35307	7.46571	0.00629304	0.120179	MSMEG_2106	MSMEG_2106
-2.3835	6.67542	7.46352	0.00630067	0.120179	MSMEG_2345	MSMEG_2345
2.38832	8.25764	7.41037	0.00648948	0.123281	MSMEG_4745	MSMEG_4745
2.6602	7.57955	7.40368	0.00651364	0.123281	MSMEG_3811	MSMEG_3811
-1.36736	9.6509	7.38219	0.00659193	0.124283	MSMEG_6329	MSMEG_6329
-1.40621	9.43737	7.37402	0.00662191	0.12437	MSMEG_4059	MSMEG_4059
-1.26169	11.7156	7.32725	0.00679639	0.127064	ahcY	MSMEG_1843
2.27078	8.1925	7.32176	0.00681718	0.127064	MSMEG_3079	MSMEG_3079
-1.87638	8.31563	7.29311	0.00692673	0.128617	MSMEG_3333	MSMEG_3333
2.99207	7.69109	7.28154	0.00697147	0.128959	MSMEG_5664	MSMEG_5664
6.6083	6.31808	7.26543	0.00703426	0.129145	MSMEG_5677	MSMEG_5677
-1.25352	10.453	7.25921	0.00705864	0.129145	MSMEG_6422	MSMEG_6422
6.48761	6.47656	7.25871	0.00706058	0.129145	MSMEG_6418	MSMEG_6418
6.46706	6.49001	7.22477	0.00719529	0.131015	MSMEG_4893	MSMEG_4893
1.99077	8.67839	7.21956	0.00721622	0.131015	hmgA	MSMEG_2075
6.6442	6.24686	7.19035	0.00733458	0.132132	MSMEG_3162	MSMEG_3162
-1.24857	10.3736	7.18781	0.00734496	0.132132	MSMEG_5245	MSMEG_5245
6.50717	6.42027	7.18447	0.00735864	0.132132	MSMEG_4195	MSMEG_4195
2.60688	7.84819	7.15479	0.00748138	0.133846	rbfA	MSMEG_2629
2.60966	7.67178	7.12179	0.0076203	0.135835	MSMEG_6726	MSMEG_6726
6.53523	6.33986	7.06936	0.00784641	0.139359	MSMEG_3198	MSMEG_3198
-2.69363	6.21799	7.04839	0.00793877	0.14047	nadB	MSMEG_3200
-4.75186	4.73653	7.04219	0.00796629	0.14047	MSMEG_4317	MSMEG_4317
6.63405	6.19735	7.0293	0.00802383	0.140978	MSMEG_2608	MSMEG_2608
-2.04541	7.77125	6.98964	0.0082035	0.14362	MSMEG_5496	MSMEG_5496
3.46511	6.86541	6.96744	0.00830587	0.144895	MSMEG_0914	MSMEG_0914
-1.93346	7.76196	6.95904	0.00834495	0.14506	MSMEG_0132	MSMEG_0132
1.92148	8.7442	6.93345	0.00846516	0.146442	ffh	MSMEG_2430
6.52863	6.28943	6.92942	0.00848421	0.146442	MSMEG_1304	MSMEG_1304
2.5664	7.62494	6.90776	0.00858758	0.146814	MSMEG_0243	MSMEG_0243
3.38636	7.3062	6.90198	0.00861538	0.146814	purB	MSMEG_5847
-2.91317	6.02932	6.8884	0.00868105	0.146814	MSMEG_3397	MSMEG_3397
-2.09478	7.0329	6.88613	0.00869209	0.146814	MSMEG_5109	MSMEG_5109
-2.18202	6.79416	6.88598	0.00869281	0.146814	MSMEG_6454	MSMEG_6454
2.31571	8.22199	6.88434	0.00870081	0.146814	MSMEG_5061	MSMEG_5061
1.59759	9.21043	6.88135	0.00871538	0.146814	MSMEG_1342	MSMEG_1342
6.49416	6.30125	6.8414	0.00891234	0.149417	mraY	MSMEG_4230
1.29996	10.7358	6.82671	0.00898594	0.149417	atpA	MSMEG_4938
6.32472	6.53755	6.82492	0.00899497	0.149417	MSMEG_1148	MSMEG_1148
2.68292	7.33371	6.81704	0.00903469	0.149417	MSMEG_5447	MSMEG_5447
-2.62265	6.29861	6.81238	0.00905833	0.149417	MSMEG_5581	MSMEG_5581
-3.47826	4.9249	6.81073	0.00906666	0.149417	MSMEG_1754	MSMEG_1754
3.42232	6.88821	6.80746	0.00908327	0.149417	asnB	MSMEG_4269
6.49929	6.2794	6.78817	0.00918196	0.150064	lipB	MSMEG_4285
-3.32552	5.41452	6.78779	0.00918387	0.150064	MSMEG_1939	MSMEG_1939
2.54812	7.61293	6.78185	0.0092145	0.150065	MSMEG_1812	MSMEG_1812
3.35934	7.16435	6.74919	0.00938465	0.151756	dapA	MSMEG_2684
1.82453	8.87194	6.73708	0.00944853	0.151756	mraZ	MSMEG_4236
2.53505	7.71652	6.7317	0.00947706	0.151756	MSMEG_5870	MSMEG_5870
-3.17833	5.61715	6.72768	0.00949844	0.151756	MSMEG_3701	MSMEG_3701
-1.30937	9.59721	6.72062	0.00953613	0.151756	MSMEG_0387	MSMEG_0387
2.66496	7.53884	6.71637	0.00955887	0.151756	MSMEG_4560	MSMEG_4560
-2.01754	7.68879	6.71603	0.00956068	0.151756	cysNC	MSMEG_4978
2.43545	7.78779	6.71279	0.00957803	0.151756	trmB	MSMEG_0252
2.8888	7.24792	6.70927	0.00959698	0.151756	purD	MSMEG_5852
6.4593	6.26622	6.64068	0.00997339	0.157201	MSMEG_2348	MSMEG_2348
2.64348	7.38255	6.6315	0.0100249	0.157507	lexA	MSMEG_2740
-1.20719	12.0014	6.62385	0.010068	0.157679	MSMEG_3890	MSMEG_3890
2.86515	7.23212	6.61556	0.010115	0.15791	purT	MSMEG_0766
2.63903	7.4871	6.58279	0.0103028	0.15973	MSMEG_5799	MSMEG_5799
-1.20376	12.035	6.57992	0.0103195	0.15973	MSMEG_1743	MSMEG_1743
-3.94538	4.67059	6.57822	0.0103293	0.15973	MSMEG_3984	MSMEG_3984
3.36758	6.88955	6.55228	0.0104809	0.160981	MSMEG_0293	MSMEG_0293
6.37334	6.34114	6.54526	0.0105224	0.160981	MSMEG_2535	MSMEG_2535
1.97496	8.58396	6.53816	0.0105644	0.160981	MSMEG_6089	MSMEG_6089
3.33171	7.02388	6.53634	0.0105752	0.160981	ubiE	MSMEG_1115
2.21688	8.01054	6.52451	0.0106458	0.160981	MSMEG_4492	MSMEG_4492
-1.73508	8.38794	6.52089	0.0106674	0.160981	MSMEG_5091	MSMEG_5091
-1.50538	8.97032	6.50648	0.0107542	0.160981	MSMEG_1253	MSMEG_1253
-1.96492	7.03826	6.50648	0.0107542	0.160981	MSMEG_2982	MSMEG_2982
-3.59878	4.83534	6.50475	0.0107647	0.160981	MSMEG_4412	MSMEG_4412
-1.18637	11.385	6.50124	0.010786	0.160981	MSMEG_4268	MSMEG_4268
6.3486	6.35112	6.50008	0.010793	0.160981	MSMEG_3393	MSMEG_3393
1.78026	8.82109	6.49822	0.0108043	0.160981	dxs	MSMEG_2776
1.97346	8.56306	6.47607	0.0109397	0.162504	MSMEG_6084	MSMEG_6084
2.35485	8.01193	6.41873	0.0112985	0.167326	MSMEG_0031	MSMEG_0031
6.42254	6.21579	6.40792	0.0113674	0.167368	MSMEG_6824	MSMEG_6824
3.34693	6.84205	6.40759	0.0113696	0.167368	MSMEG_3737	MSMEG_3737
6.02044	6.92717	6.38517	0.011514	0.168987	MSMEG_2476	MSMEG_2476
3.27522	7.22432	6.3759	0.0115743	0.169364	MSMEG_3494	MSMEG_3494
-1.95194	7.75034	6.32328	0.0119227	0.173943	MSMEG_3933	MSMEG_3933
6.42495	6.14454	6.25895	0.0123632	0.179836	MSMEG_0240	MSMEG_0240
-2.94541	5.93258	6.22413	0.0126086	0.182215	MSMEG_2269	MSMEG_2269
2.56955	7.46745	6.22372	0.0126115	0.182215	MSMEG_0635	MSMEG_0635
1.98824	8.4127	6.21996	0.0126384	0.182215	MSMEG_5685	MSMEG_5685
-1.83408	7.78975	6.18179	0.0129138	0.185641	MSMEG_1910	MSMEG_1910
-2.41278	6.37303	6.14531	0.0131827	0.188953	MSMEG_3975	MSMEG_3975
6.2908	6.26477	6.129	0.0133049	0.190147	nth	MSMEG_6187
-1.14191	10.7543	6.08952	0.0136054	0.193877	MSMEG_1930	MSMEG_1930
6.411	6.08119	6.08357	0.0136512	0.193966	rpsO	MSMEG_2654
3.19963	7.29404	6.07073	0.0137508	0.193979	MSMEG_3675	MSMEG_3675
6.32469	6.18827	6.0699	0.0137573	0.193979	MSMEG_6763	MSMEG_6763
-3.54396	5.40849	6.06816	0.0137708	0.193979	MSMEG_3981	MSMEG_3981
-2.63471	6.09682	6.05768	0.0138527	0.194574	MSMEG_5287	MSMEG_5287
6.21032	6.33236	6.03341	0.0140445	0.196296	MSMEG_6491	MSMEG_6491
6.28581	6.22443	6.03203	0.0140555	0.196296	xylB	MSMEG_3257
2.2317	7.88822	6.00393	0.014281	0.198879	MSMEG_0833	MSMEG_0833
1.91742	8.36725	5.9596	0.0146444	0.203362	MSMEG_0946	MSMEG_0946
1.87369	8.59458	5.95082	0.0147175	0.203465	mce	MSMEG_4921
2.12233	8.15079	5.94875	0.0147348	0.203465	MSMEG_0645	MSMEG_0645
1.79466	8.60619	5.92631	0.0149236	0.204918	MSMEG_2937	MSMEG_2937
6.30129	6.15645	5.9263	0.0149236	0.204918	MSMEG_3050	MSMEG_3050
2.73582	7.04985	5.90849	0.0150752	0.206421	murC	MSMEG_4226
2.50139	7.62367	5.8889	0.0152438	0.208001	MSMEG_5053	MSMEG_5053
6.36264	6.04381	5.88272	0.0152974	0.208001	MSMEG_6434	MSMEG_6434
-1.1278	11.5207	5.88036	0.0153179	0.208001	MSMEG_4260	MSMEG_4260
3.23174	6.80137	5.86019	0.0154943	0.209542	MSMEG_6660	MSMEG_6660
1.659	8.94322	5.85763	0.0155169	0.209542	sucD	MSMEG_5524
-1.25205	9.47691	5.85269	0.0155604	0.209553	MSMEG_2038	MSMEG_2038
2.12949	8.04037	5.84116	0.0156628	0.210353	pheT	MSMEG_3777
6.2228	6.21665	5.83447	0.0157224	0.210578	MSMEG_0959	MSMEG_0959
3.27243	6.68703	5.82477	0.0158093	0.210917	MSMEG_6158	MSMEG_6158
2.14932	8.12641	5.82205	0.0158338	0.210917	MSMEG_1935	MSMEG_1935
2.48355	7.49382	5.81464	0.0159006	0.211232	MSMEG_5555	MSMEG_5555
2.45925	7.91165	5.77813	0.0162341	0.214959	MSMEG_0694	MSMEG_0694
2.08389	8.17618	5.77438	0.0162689	0.214959	thiD	MSMEG_0825
3.25251	6.68866	5.75437	0.0164551	0.216806	cofD	MSMEG_1830
6.31932	6.02879	5.74989	0.0164971	0.216806	MSMEG_4664	MSMEG_4664
5.91588	6.66133	5.72714	0.0167121	0.219045	MSMEG_0020	MSMEG_0020
1.45137	9.17311	5.70646	0.0169102	0.22105	MSMEG_3225	MSMEG_3225
3.22662	6.71546	5.68911	0.0170781	0.222443	MSMEG_1932	MSMEG_1932
2.45986	7.46643	5.68609	0.0171075	0.222443	MSMEG_0550	MSMEG_0550
-1.15778	9.88511	5.67548	0.0172112	0.223107	aspA	MSMEG_1677
-1.11233	11.8616	5.6672	0.0172926	0.223107	gyrA	MSMEG_0006
-3.23883	4.84564	5.66694	0.0172951	0.223107	MSMEG_4149	MSMEG_4149
6.09725	6.29229	5.62904	0.017673	0.227383	MSMEG_1137	MSMEG_1137
1.62803	8.88927	5.62349	0.017729	0.227506	MSMEG_4533	MSMEG_4533
-3.32925	5.41208	5.61306	0.0178348	0.228266	MSMEG_3330	MSMEG_3330
-2.05485	6.97917	5.60391	0.0179281	0.228864	MSMEG_4078	MSMEG_4078
1.17814	11.0111	5.58581	0.0181144	0.230638	MSMEG_5789	MSMEG_5789
-1.75721	7.87597	5.58128	0.0181612	0.230638	MSMEG_0111	MSMEG_0111
6.28714	5.98028	5.57369	0.0182401	0.231041	MSMEG_1187	MSMEG_1187
-3.87712	4.80665	5.56703	0.0183095	0.231323	MSMEG_6420	MSMEG_6420
-1.78544	7.42773	5.5405	0.0185891	0.234028	MSMEG_2426	MSMEG_2426
-2.70113	5.92263	5.53535	0.0186439	0.234028	MSMEG_4050	MSMEG_4050
3.25502	6.57943	5.53238	0.0186755	0.234028	MSMEG_0222	MSMEG_0222
-1.83308	7.18419	5.52872	0.0187146	0.234028	MSMEG_6663	MSMEG_6663
6.25569	5.9954	5.51051	0.0189104	0.235875	MSMEG_0944	MSMEG_0944
1.15001	10.9508	5.49621	0.0190657	0.237208	nusG	MSMEG_1345
2.32381	7.68964	5.48549	0.0191829	0.238062	MSMEG_5585	MSMEG_5585
6.17996	6.08437	5.47393	0.0193102	0.238452	MSMEG_3882	MSMEG_3882
1.98818	8.18529	5.47181	0.0193335	0.238452	cdsA	MSMEG_2543
6.18575	6.07321	5.46564	0.0194019	0.238452	MSMEG_3741	MSMEG_3741
6.24843	5.96751	5.46369	0.0194236	0.238452	MSMEG_3754	MSMEG_3754
1.28579	9.59252	5.46064	0.0194575	0.238452	MSMEG_4939	MSMEG_4939
-1.54605	8.61746	5.44965	0.0195802	0.239357	ilvH	MSMEG_2373
1.97505	8.33926	5.44373	0.0196468	0.239573	MSMEG_0139	MSMEG_0139
2.61606	7.20524	5.43636	0.0197298	0.239988	acpS	MSMEG_4756
-2.00432	6.64516	5.42451	0.0198641	0.240915	MSMEG_2837	MSMEG_2837
2.27762	7.53977	5.42098	0.0199042	0.240915	MSMEG_1108	MSMEG_1108
-2.33008	6.33121	5.41032	0.0200262	0.241218	MSMEG_4161	MSMEG_4161
2.39727	7.32516	5.39985	0.0201467	0.241218	MSMEG_5517	MSMEG_5517
-3.0974	5.03708	5.39879	0.0201588	0.241218	MSMEG_1090	MSMEG_1090
3.25243	6.52808	5.39538	0.0201982	0.241218	MSMEG_2529	MSMEG_2529
6.13673	6.10663	5.39072	0.0202523	0.241218	MSMEG_3643	MSMEG_3643
1.89259	8.26786	5.3906	0.0202537	0.241218	prfB	MSMEG_2086
2.39522	7.6791	5.38887	0.0202738	0.241218	MSMEG_2786	MSMEG_2786
6.1608	6.0538	5.36888	0.0205073	0.241949	MSMEG_3674	MSMEG_3674
2.17589	7.77761	5.3667	0.020533	0.241949	MSMEG_6518	MSMEG_6518
-1.0681	10.9422	5.36514	0.0205514	0.241949	dnaK	MSMEG_0709
2.59722	7.61113	5.3609	0.0206014	0.241949	groES	MSMEG_1582
-2.89853	5.54136	5.35995	0.0206126	0.241949	MSMEG_0616	MSMEG_0616
-1.29425	9.19425	5.35837	0.0206313	0.241949	MSMEG_5402	MSMEG_5402
6.23416	5.91603	5.34245	0.0208205	0.243584	MSMEG_4369	MSMEG_4369
-1.10921	10.0947	5.3206	0.0210831	0.24607	ppk	MSMEG_2391
2.6058	7.02595	5.30857	0.0212291	0.246773	glmM	MSMEG_1559
2.37288	7.42924	5.3018	0.0213117	0.246773	tgt	MSMEG_6313
-2.66819	5.88002	5.29461	0.0213999	0.246773	MSMEG_5015	MSMEG_5015
3.08604	6.82411	5.29317	0.0214176	0.246773	pcaC	MSMEG_0905
3.12993	6.69705	5.29045	0.0214511	0.246773	MSMEG_0906	MSMEG_0906
2.37306	7.32334	5.28837	0.0214767	0.246773	lysA	MSMEG_4958
3.17065	6.61807	5.28587	0.0215075	0.246773	MSMEG_3181	MSMEG_3181
3.11687	6.72795	5.28275	0.0215461	0.246773	MSMEG_4353	MSMEG_4353
3.20032	6.55237	5.27167	0.0216836	0.247307	MSMEG_3182	MSMEG_3182
-3.27129	5.02862	5.27087	0.0216936	0.247307	ctaD	MSMEG_2320
6.11223	6.05671	5.26197	0.0218048	0.247422	lon	MSMEG_3582
-1.06311	10.5086	5.25902	0.0218417	0.247422	MSMEG_5244	MSMEG_5244
6.11758	6.0569	5.25795	0.0218551	0.247422	MSMEG_1291	MSMEG_1291
2.57034	7.52066	5.24944	0.0219623	0.248063	MSMEG_0823	MSMEG_0823
2.15505	7.61472	5.24163	0.0220611	0.248606	MSMEG_0057	MSMEG_0057
-3.30833	5.18975	5.21757	0.0223683	0.251489	MSMEG_4126	MSMEG_4126
1.25217	9.63374	5.20558	0.022523	0.25183	dnaA	MSMEG_6947
1.54402	9.04566	5.20308	0.0225554	0.25183	MSMEG_3159	MSMEG_3159
3.06833	6.79594	5.19904	0.0226079	0.25183	MSMEG_1943	MSMEG_1943
-3.18081	4.94004	5.19645	0.0226416	0.25183	MSMEG_2742	MSMEG_2742
6.12811	6.0009	5.19539	0.0226555	0.25183	MSMEG_5717	MSMEG_5717
6.00732	6.1835	5.18705	0.0227644	0.252303	MSMEG_6090	MSMEG_6090
2.14423	7.76483	5.18426	0.0228009	0.252303	gcvP	MSMEG_3642
-1.71217	7.72338	5.17386	0.0229378	0.253246	MSMEG_1078	MSMEG_1078
6.08533	6.03542	5.15394	0.0232023	0.255289	mtaP	MSMEG_0990
2.12522	7.89076	5.14936	0.0232636	0.255289	MSMEG_0064	MSMEG_0064
2.57672	6.98154	5.1482	0.0232791	0.255289	MSMEG_0029	MSMEG_0029
6.12128	5.96373	5.13728	0.023426	0.256327	MSMEG_2545	MSMEG_2545
2.54944	7.22717	5.1262	0.0235759	0.257019	MSMEG_3164	MSMEG_3164
-1.68588	7.94826	5.12486	0.0235941	0.257019	MSMEG_6574	MSMEG_6574
1.52963	8.95696	5.11631	0.0237107	0.257716	MSMEG_1525	MSMEG_1525
5.94339	6.23697	5.10922	0.0238077	0.258198	MSMEG_5163	MSMEG_5163
-1.23687	9.17169	5.10177	0.0239102	0.258703	MSMEG_3289	MSMEG_3289
6.01698	6.10545	5.09817	0.0239599	0.258703	MSMEG_3925	MSMEG_3925
-1.29564	9.02151	5.08603	0.0241282	0.259948	MSMEG_6656	MSMEG_6656
2.05995	7.74051	5.07348	0.0243033	0.260714	MSMEG_0311	MSMEG_0311
-3.11712	5.36519	5.07177	0.0243274	0.260714	MSMEG_6677	MSMEG_6677
2.33584	7.09863	5.06953	0.0243589	0.260714	dut	MSMEG_2765
6.07446	5.98336	5.05431	0.0245736	0.261863	MSMEG_3088	MSMEG_3088
-1.75284	7.1138	5.05131	0.0246161	0.261863	coaD	MSMEG_2414
1.13006	10.5545	5.05059	0.0246265	0.261863	etfB	MSMEG_2351
-1.75295	7.10596	5.04316	0.0247322	0.262419	wrbA	MSMEG_2375
3.06126	6.71051	5.0346	0.0248548	0.263149	MSMEG_5673	MSMEG_5673
-1.88934	6.93297	5.02823	0.0249463	0.263549	MSMEG_6009	MSMEG_6009
-1.66751	7.41767	5.02386	0.0250094	0.263647	MSMEG_6359	MSMEG_6359
-1.72909	7.41207	5.00832	0.0252347	0.264308	MSMEG_4739	MSMEG_4739
2.50908	7.67994	5.00763	0.0252448	0.264308	menB	MSMEG_1075
2.18877	7.50265	5.00324	0.0253088	0.264308	MSMEG_5121	MSMEG_5121
-1.57584	8.23783	5.00121	0.0253385	0.264308	MSMEG_3246	MSMEG_3246
2.32972	7.00678	5.00044	0.0253499	0.264308	MSMEG_0108	MSMEG_0108
1.75524	8.48061	4.99732	0.0253955	0.264308	MSMEG_6400	MSMEG_6400
5.96374	6.12788	4.98217	0.0256189	0.266067	MSMEG_0818	MSMEG_0818
2.09788	7.79327	4.97463	0.0257307	0.266663	MSMEG_0033	MSMEG_0033
1.49272	8.926	4.97071	0.0257891	0.266705	MSMEG_4272	MSMEG_4272
3.05418	6.67125	4.9634	0.0258983	0.267263	thrC	MSMEG_4956
-2.12187	6.42306	4.95852	0.0259715	0.267263	MSMEG_5014	MSMEG_5014
6.05196	5.95334	4.95618	0.0260067	0.267263	MSMEG_0361	MSMEG_0361
2.17489	7.21534	4.94698	0.0261453	0.268126	MSMEG_1130	MSMEG_1130
1.61662	8.69705	4.93851	0.0262738	0.268881	hemC	MSMEG_0953
-1.51639	8.39762	4.92804	0.0264334	0.269457	MSMEG_0777	MSMEG_0777
1.26711	9.4873	4.92761	0.0264399	0.269457	MSMEG_0225	MSMEG_0225
-1.08817	9.74386	4.92106	0.0265404	0.269919	glgB	MSMEG_4918
6.03068	5.95425	4.90883	0.0267288	0.271273	MSMEG_6478	MSMEG_6478
6.03529	5.92799	4.88171	0.027152	0.274515	MSMEG_6289	MSMEG_6289
5.91959	6.12357	4.88118	0.0271603	0.274515	MSMEG_2731	MSMEG_2731
-1.74349	7.63225	4.87008	0.0273355	0.275064	MSMEG_0594	MSMEG_0594
3.03535	6.65942	4.86992	0.027338	0.275064	MSMEG_1136	MSMEG_1136
5.90601	6.13412	4.86708	0.027383	0.275064	MSMEG_6724	MSMEG_6724
6.01198	5.95352	4.85619	0.0275563	0.275605	MSMEG_2163	MSMEG_2163
-1.30049	8.93594	4.85511	0.0275737	0.275605	MSMEG_1862	MSMEG_1862
-1.57853	8.11132	4.85031	0.0276504	0.275605	MSMEG_4194	MSMEG_4194
-3.2724	4.76293	4.84961	0.0276617	0.275605	MSMEG_1590	MSMEG_1590
3.05947	6.59656	4.84031	0.0278111	0.27624	MSMEG_6453	MSMEG_6453
6.0009	5.95226	4.83864	0.0278382	0.27624	MSMEG_0011	MSMEG_0011
-1.42567	8.63657	4.82701	0.0280265	0.277547	MSMEG_6212	MSMEG_6212
2.53726	6.80698	4.81049	0.0282963	0.279654	MSMEG_6354	MSMEG_6354
5.95741	5.98305	4.77121	0.028949	0.285529	MSMEG_0184	MSMEG_0184
5.9946	5.90103	4.76426	0.029066	0.28579	map	MSMEG_5050
5.78371	6.26834	4.76157	0.0291114	0.28579	MSMEG_3493	MSMEG_3493
-2.78537	5.74543	4.75927	0.0291504	0.28579	MSMEG_3023	MSMEG_3023
2.13028	7.2891	4.7452	0.0293897	0.287193	MSMEG_5431	MSMEG_5431
1.10797	10.2409	4.74053	0.0294695	0.287193	MSMEG_6440	MSMEG_6440
-2.88873	4.79932	4.7374	0.0295231	0.287193	MSMEG_6687	MSMEG_6687
2.12572	7.72575	4.73406	0.0295805	0.287193	MSMEG_2630	MSMEG_2630
-1.23445	8.97567	4.72876	0.0296718	0.287193	MSMEG_1802	MSMEG_1802
6.00867	5.84224	4.7284	0.0296781	0.287193	MSMEG_1528	MSMEG_1528
-1.02854	12.4129	4.72548	0.0297284	0.287193	MSMEG_4262	MSMEG_4262
5.94296	5.96846	4.72353	0.0297622	0.287193	MSMEG_0093	MSMEG_0093
-3.2115	4.80373	4.71547	0.0299019	0.287975	MSMEG_3700	MSMEG_3700
1.64328	8.41408	4.71073	0.0299846	0.288182	aspS	MSMEG_3003
1.5234	8.91216	4.70474	0.0300891	0.288182	metG	MSMEG_5441
-2.70501	5.60109	4.70413	0.0300998	0.288182	MSMEG_4740	MSMEG_4740
5.93167	5.97133	4.69653	0.0302332	0.288895	MSMEG_6592	MSMEG_6592
5.99357	5.83421	4.68731	0.0303957	0.289883	MSMEG_6828	MSMEG_6828
-1.51287	8.2541	4.68135	0.0305014	0.290255	MSMEG_3713	MSMEG_3713
5.85632	6.08056	4.67712	0.0305766	0.290255	MSMEG_6383	MSMEG_6383
1.23442	9.41656	4.6737	0.0306376	0.290255	rplU	MSMEG_4625
2.98037	6.659	4.67179	0.0306716	0.290255	MSMEG_3175	MSMEG_3175
5.65448	6.42432	4.66286	0.0308314	0.291061	MSMEG_4511	MSMEG_4511
2.9915	6.62901	4.66041	0.0308755	0.291061	MSMEG_3666	MSMEG_3666
2.94444	6.73365	4.65182	0.0310304	0.291608	MSMEG_5198	MSMEG_5198
-2.12042	6.3414	4.65059	0.0310525	0.291608	MSMEG_5616	MSMEG_5616
2.10501	7.37259	4.63099	0.0314092	0.293444	MSMEG_1662	MSMEG_1662
2.92233	6.78135	4.63078	0.031413	0.293444	MSMEG_1618	MSMEG_1618
5.98655	5.80523	4.62999	0.0314276	0.293444	MSMEG_2019	MSMEG_2019
-2.74045	5.13107	4.6246	0.0315264	0.293807	MSMEG_0265	MSMEG_0265
1.67704	8.43696	4.60524	0.0318841	0.296577	secE	MSMEG_1344
-1.6975	8.03963	4.58682	0.0322285	0.299212	MSMEG_3946	MSMEG_3946
-1.00093	11.8472	4.57814	0.0323922	0.300164	MSMEG_1886	MSMEG_1886
2.8715	6.91567	4.57311	0.0324875	0.300479	MSMEG_6484	MSMEG_6484
-1.53269	8.18979	4.56373	0.0326658	0.301252	MSMEG_5318	MSMEG_5318
3.06709	6.43968	4.56149	0.0327086	0.301252	proC	MSMEG_0943
-3.1178	5.30558	4.55903	0.0327555	0.301252	MSMEG_0148	MSMEG_0148
-1.5963	7.26987	4.54554	0.0330145	0.302528	MSMEG_6366	MSMEG_6366
2.41922	7.04948	4.54425	0.0330394	0.302528	MSMEG_2369	MSMEG_2369
5.92272	5.85056	4.54218	0.0330794	0.302528	MSMEG_0644	MSMEG_0644
1.65446	8.46954	4.53442	0.0332296	0.302554	MSMEG_6288	MSMEG_6288
-3.15119	4.82315	4.52906	0.0333338	0.302554	MSMEG_6556	MSMEG_6556
5.87122	5.94249	4.52762	0.033362	0.302554	MSMEG_3478	MSMEG_3478
5.95927	5.74032	4.52632	0.0333873	0.302554	MSMEG_4238	MSMEG_4238
1.94244	7.72872	4.52614	0.0333908	0.302554	hemH	MSMEG_3152
5.85848	5.95245	4.51075	0.0336924	0.304724	MSMEG_0219	MSMEG_0219
5.86227	5.92981	4.49077	0.0340883	0.30726	MSMEG_1293	MSMEG_1293
2.40276	7.08529	4.48909	0.0341219	0.30726	MSMEG_1936	MSMEG_1936
5.91403	5.81162	4.48652	0.0341731	0.30726	MSMEG_2679	MSMEG_2679
2.45994	6.79011	4.484	0.0342236	0.30726	MSMEG_0415	MSMEG_0415
-2.63977	5.33925	4.47336	0.0344373	0.308245	MSMEG_3319	MSMEG_3319
5.91914	5.77824	4.47009	0.0345032	0.308245	MSMEG_4578	MSMEG_4578
-1.66562	7.00207	4.46833	0.0345388	0.308245	MSMEG_1794	MSMEG_1794
-2.83871	5.20917	4.46605	0.0345849	0.308245	MSMEG_6885	MSMEG_6885
-0.985508	10.4011	4.46109	0.0346854	0.30858	MSMEG_5090	MSMEG_5090
2.40566	6.96609	4.41855	0.0355603	0.315791	MSMEG_6010	MSMEG_6010
5.86919	5.83208	4.40989	0.0357414	0.316496	MSMEG_6096	MSMEG_6096
5.88923	5.78943	4.40858	0.0357688	0.316496	MSMEG_4657	MSMEG_4657
2.05487	7.6486	4.40045	0.0359396	0.317169	MSMEG_2725	MSMEG_2725
-1.52372	7.87058	4.39881	0.0359742	0.317169	MSMEG_1808	MSMEG_1808
1.30048	9.27993	4.3915	0.0361287	0.317959	MSMEG_1423	MSMEG_1423
2.47612	6.67455	4.37971	0.0363794	0.319145	MSMEG_2773	MSMEG_2773
5.84351	5.85691	4.37904	0.0363937	0.319145	cmk	MSMEG_3739
1.86186	7.86386	4.37483	0.0364837	0.319363	MSMEG_4293	MSMEG_4293
-2.47048	5.83523	4.36845	0.0366205	0.319496	ltrA	MSMEG_4766
5.67114	6.17061	4.36544	0.0366853	0.319496	MSMEG_4477	MSMEG_4477
5.81216	5.91507	4.36501	0.0366945	0.319496	MSMEG_1958	MSMEG_1958
1.96532	7.48608	4.3615	0.0367702	0.319588	dnaG	MSMEG_4482
1.01729	10.9126	4.35653	0.0368777	0.319725	MSMEG_5505	MSMEG_5505
-2.06398	6.2718	4.35197	0.0369764	0.319725	MSMEG_4193	MSMEG_4193
1.02483	10.8466	4.35173	0.0369817	0.319725	MSMEG_0401	MSMEG_0401
2.97644	6.47959	4.34365	0.0371576	0.320182	MSMEG_3873	MSMEG_3873
2.968	6.49849	4.3433	0.0371651	0.320182	MSMEG_6926	MSMEG_6926
5.67407	6.13551	4.32893	0.0374802	0.32233	MSMEG_5375	MSMEG_5375
-3.50552	4.58193	4.32398	0.0375893	0.32252	MSMEG_3356	MSMEG_3356
2.17474	7.01286	4.32196	0.0376339	0.32252	MSMEG_4200	MSMEG_4200
5.76232	5.95854	4.30745	0.0379561	0.324714	dhaK	MSMEG_2123
5.85955	5.71792	4.3041	0.038031	0.324787	MSMEG_5686	MSMEG_5686
2.02518	7.32963	4.2937	0.0382644	0.3254	MSMEG_2745	MSMEG_2745
-1.6136	7.50864	4.29315	0.0382766	0.3254	MSMEG_6423	MSMEG_6423
-3.48624	4.57633	4.29203	0.0383018	0.3254	MSMEG_3274	MSMEG_3274
1.83198	7.93896	4.27211	0.0387533	0.3269	MSMEG_4301	MSMEG_4301
5.77791	5.8888	4.26943	0.0388145	0.3269	MSMEG_4888	MSMEG_4888
-0.976864	12.4214	4.26739	0.0388611	0.3269	MSMEG_1742	MSMEG_1742
-1.47865	8.18832	4.26611	0.0388902	0.3269	MSMEG_5965	MSMEG_5965
5.78564	5.87653	4.26345	0.0389513	0.3269	MSMEG_3977	MSMEG_3977
2.36258	6.95302	4.26006	0.0390291	0.3269	MSMEG_4470	MSMEG_4470
-2.28949	6.03881	4.25882	0.0390575	0.3269	MSMEG_2264	MSMEG_2264
5.80352	5.80913	4.25808	0.0390745	0.3269	MSMEG_2359	MSMEG_2359
-1.61357	7.17316	4.25615	0.039119	0.3269	MSMEG_1779	MSMEG_1779
5.65207	6.11994	4.25501	0.0391453	0.3269	MSMEG_6037	MSMEG_6037
5.82878	5.73106	4.24714	0.0393271	0.32786	MSMEG_6238	MSMEG_6238
1.68724	8.2174	4.24057	0.0394794	0.328571	eno	MSMEG_5415
2.40508	6.74957	4.22376	0.0398723	0.331138	MSMEG_6757	MSMEG_6757
1.13817	9.56148	4.2216	0.0399231	0.331138	prfC	MSMEG_1316
5.20089	7.44509	4.21475	0.0400846	0.331917	MSMEG_4735	MSMEG_4735
1.18635	9.31381	4.2041	0.0403369	0.333443	hisC	MSMEG_6351
5.7774	5.79995	4.1933	0.0405945	0.334813	MSMEG_3806	MSMEG_3806
2.93523	6.46907	4.19144	0.0406393	0.334813	MSMEG_5633	MSMEG_5633
-1.5611	7.8523	4.18659	0.0407555	0.335207	MSMEG_6881	MSMEG_6881
2.12215	7.18696	4.17801	0.0409624	0.336344	MSMEG_3860	MSMEG_3860
5.79167	5.72257	4.16306	0.0413255	0.338758	MSMEG_1278	MSMEG_1278
-0.953366	11.9808	4.15172	0.041603	0.340464	glnA	MSMEG_4290
-2.5105	5.64071	4.14567	0.0417518	0.341112	MSMEG_2268	MSMEG_2268
2.34709	6.87338	4.13502	0.0420152	0.342693	pheS	MSMEG_3778
5.74673	5.8113	4.12705	0.0422136	0.342771	MSMEG_1118	MSMEG_1118
-3.39173	4.57142	4.12473	0.0422716	0.342771	MSMEG_1419	MSMEG_1419
1.99089	7.53409	4.12341	0.0423046	0.342771	MSMEG_6255	MSMEG_6255
-3.37697	4.54253	4.12312	0.0423117	0.342771	MSMEG_5952	MSMEG_5952
-3.15534	5.09303	4.12062	0.0423743	0.342771	MSMEG_3932	MSMEG_3932
2.88533	6.5151	4.11	0.0426412	0.344303	MSMEG_0227	MSMEG_0227
2.89657	6.49525	4.1075	0.0427042	0.344303	MSMEG_4116	MSMEG_4116
5.75483	5.75037	4.10399	0.0427929	0.344334	MSMEG_0417	MSMEG_0417
-2.16058	6.34216	4.09548	0.043009	0.344334	MSMEG_3680	MSMEG_3680
-3.37399	4.56717	4.09454	0.0430327	0.344334	MSMEG_5167	MSMEG_5167
2.70872	7.09283	4.09387	0.0430499	0.344334	MSMEG_5573	MSMEG_5573
1.7317	8.2595	4.0935	0.0430593	0.344334	gatB	MSMEG_2367
2.92932	6.42702	4.0891	0.0431714	0.344668	mmsA	MSMEG_1498
2.34614	6.82618	4.07927	0.0434234	0.344947	cysT	MSMEG_4532
-3.47173	4.76878	4.07779	0.0434614	0.344947	MSMEG_3137	MSMEG_3137
2.96096	6.36496	4.07731	0.0434737	0.344947	MSMEG_6635	MSMEG_6635
-1.5929	7.07622	4.07559	0.0435179	0.344947	MSMEG_4688	MSMEG_4688
5.62821	5.99895	4.07403	0.0435582	0.344947	MSMEG_0316	MSMEG_0316
1.83433	7.88462	4.06997	0.0436628	0.345049	purC	MSMEG_5841
-3.40494	4.65966	4.0679	0.0437166	0.345049	MSMEG_1971	MSMEG_1971
2.89486	6.46952	4.06457	0.0438027	0.345049	MSMEG_2094	MSMEG_2094
5.75252	5.67831	4.06265	0.0438526	0.345049	MSMEG_0919	MSMEG_0919
1.19907	9.32551	4.05871	0.0439551	0.345301	MSMEG_6286	MSMEG_6286
1.11902	9.59857	4.05328	0.0440966	0.345859	leuS	MSMEG_6917
5.58149	6.06816	4.04438	0.0443295	0.346104	MSMEG_5036	MSMEG_5036
-3.4034	4.68459	4.04195	0.0443934	0.346104	MSMEG_6345	MSMEG_6345
5.67063	5.8767	4.0414	0.0444079	0.346104	MSMEG_5741	MSMEG_5741
2.87675	6.4792	4.0227	0.0449027	0.346104	MSMEG_0539	MSMEG_0539
2.84787	6.53007	4.0217	0.0449293	0.346104	MSMEG_0063	MSMEG_0063
-3.38305	4.66608	4.02037	0.0449649	0.346104	groEL	MSMEG_1978
1.65044	8.07316	4.01982	0.0449794	0.346104	MSMEG_1883	MSMEG_1883
2.10417	6.96461	4.01647	0.0450689	0.346104	ruvC	MSMEG_2943
2.27145	7.21504	4.01643	0.04507	0.346104	MSMEG_5470	MSMEG_5470
5.68397	5.81903	4.0152	0.0451028	0.346104	MSMEG_0781	MSMEG_0781
5.71266	5.73879	4.01201	0.0451881	0.346104	MSMEG_4924	MSMEG_4924
5.67711	5.83702	4.0101	0.0452396	0.346104	MSMEG_2162	MSMEG_2162
5.67022	5.84158	4.00951	0.0452554	0.346104	MSMEG_5412	MSMEG_5412
1.88359	7.5336	4.00934	0.0452599	0.346104	MSMEG_2612	MSMEG_2612
5.64337	5.90453	4.00922	0.045263	0.346104	MSMEG_2804	MSMEG_2804
1.16901	9.22487	4.00782	0.0453006	0.346104	MSMEG_3197	MSMEG_3197
-3.38192	4.6785	4.0068	0.0453282	0.346104	MSMEG_3726	MSMEG_3726
5.67973	5.81737	4.00408	0.0454014	0.346124	MSMEG_1827	MSMEG_1827
2.07075	7.63113	4.00005	0.04551	0.346413	MSMEG_6909	MSMEG_6909
5.64312	5.88982	3.99504	0.0456453	0.346904	MSMEG_3408	MSMEG_3408
5.70657	5.7143	3.99209	0.0457254	0.346957	MSMEG_1895	MSMEG_1895
-3.38038	4.69537	3.98843	0.0458248	0.346957	MSMEG_1962	MSMEG_1962
5.7205	5.63545	3.98515	0.045914	0.346957	MSMEG_3177	MSMEG_3177
5.66976	5.81345	3.98437	0.0459353	0.346957	MSMEG_6941	MSMEG_6941
-2.62301	5.92343	3.97858	0.0460935	0.347528	MSMEG_5125	MSMEG_5125
5.71462	5.64737	3.97642	0.0461527	0.347528	MSMEG_0742	MSMEG_0742
2.35483	6.70351	3.96706	0.0464097	0.348927	MSMEG_5690	MSMEG_5690
5.70408	5.64905	3.96156	0.0465616	0.349533	MSMEG_3045	MSMEG_3045
1.86884	7.38746	3.95271	0.046807	0.350838	purT	MSMEG_5274
5.6959	5.64767	3.94737	0.0469559	0.350972	MSMEG_6222	MSMEG_6222
2.88268	6.42391	3.94482	0.047027	0.350972	dcd	MSMEG_0678
5.63801	5.84572	3.94437	0.0470397	0.350972	purS	MSMEG_5832
1.24859	9.15676	3.93926	0.0471827	0.350995	MSMEG_0373	MSMEG_0373
1.81204	7.50919	3.93775	0.0472251	0.350995	MSMEG_4038	MSMEG_4038
5.7001	5.59047	3.93501	0.0473021	0.350995	MSMEG_5201	MSMEG_5201
1.65685	8.05369	3.93197	0.0473874	0.350995	MSMEG_6189	MSMEG_6189
1.81075	7.59612	3.9315	0.0474007	0.350995	MSMEG_4915	MSMEG_4915
1.48491	8.58988	3.92493	0.0475863	0.351837	MSMEG_0531	MSMEG_0531
1.16196	9.39931	3.91824	0.0477761	0.352709	MSMEG_5549	MSMEG_5549
1.02496	9.94562	3.91314	0.0479212	0.353248	MSMEG_6540	MSMEG_6540
-1.46885	7.86712	3.90272	0.0482191	0.35491	uppS	MSMEG_4490
5.68194	5.60936	3.89995	0.0482987	0.354963	MSMEG_4216	MSMEG_4216
-1.95435	6.37271	3.89457	0.0484537	0.355569	MSMEG_4063	MSMEG_4063
1.44846	8.5122	3.88929	0.0486062	0.355968	cysA	MSMEG_4530
1.24848	9.04972	3.88766	0.0486533	0.355968	trpC	MSMEG_3219
1.64543	8.05604	3.88318	0.0487832	0.356386	MSMEG_0973	MSMEG_0973
2.77484	6.58634	3.87352	0.0490649	0.357445	MSMEG_4755	MSMEG_4755
-2.36982	5.90177	3.86848	0.0492122	0.357445	MSMEG_3218	MSMEG_3218
-0.965341	9.77336	3.86758	0.0492387	0.357445	sdaA	MSMEG_3440
5.62513	5.76831	3.86392	0.0493463	0.357445	purN	MSMEG_5516
5.65075	5.66877	3.86367	0.0493535	0.357445	MSMEG_4354	MSMEG_4354
2.0518	7.06088	3.86242	0.0493904	0.357445	MSMEG_4322	MSMEG_4322
2.25531	6.97179	3.86058	0.0494445	0.357445	rplL	MSMEG_1365
2.79879	6.52611	3.85793	0.0495226	0.357445	MSMEG_5680	MSMEG_5680
2.30135	6.76078	3.8555	0.0495943	0.357445	ppnK	MSMEG_3750
1.51216	8.56136	3.8517	0.0497069	0.357445	mraW	MSMEG_4235
5.62722	5.74039	3.85091	0.0497302	0.357445	MSMEG_4300	MSMEG_4300
1.53303	8.56484	3.84255	0.0499787	0.358232	MSMEG_6441	MSMEG_6441
2.06328	6.94193	3.8415	0.0500101	0.358232	MSMEG_6614	MSMEG_6614
1.78784	7.71462	3.83986	0.050059	0.358232	MSMEG_5257	MSMEG_5257
5.64648	5.61233	3.83649	0.0501596	0.358429	MSMEG_4484	MSMEG_4484
2.04361	7.07564	3.83014	0.0503502	0.358868	MSMEG_1548	MSMEG_1548
5.6208	5.71933	3.82738	0.0504329	0.358868	MSMEG_1963	MSMEG_1963
-0.911212	11.5381	3.82713	0.0504406	0.358868	MSMEG_4263	MSMEG_4263
5.59412	5.76673	3.80055	0.0512472	0.36367	MSMEG_4804	MSMEG_4804
1.8342	7.47164	3.8	0.0512639	0.36367	MSMEG_2788	MSMEG_2788
1.7337	7.78418	3.79414	0.0514436	0.363928	MSMEG_0411	MSMEG_0411
5.63254	5.542	3.79397	0.0514488	0.363928	MSMEG_6093	MSMEG_6093
5.62701	5.59376	3.79005	0.0515695	0.364256	MSMEG_6513	MSMEG_6513
1.55965	8.2658	3.7772	0.0519669	0.366535	tatC	MSMEG_3886
5.60955	5.65663	3.77457	0.0520487	0.366584	MSMEG_1856	MSMEG_1856
5.2794	6.39702	3.77114	0.0521556	0.36681	MSMEG_2434	MSMEG_2434
1.72062	7.91576	3.76647	0.0523014	0.367308	MSMEG_5104	MSMEG_5104
2.79538	6.47281	3.76376	0.0523863	0.367378	MSMEG_6519	MSMEG_6519
2.70738	6.64614	3.75038	0.0528069	0.369705	MSMEG_1402	MSMEG_1402
5.60765	5.52839	3.74702	0.0529134	0.369705	MSMEG_6766	MSMEG_6766
2.85318	6.36156	3.74516	0.0529721	0.369705	MSMEG_3314	MSMEG_3314
-0.958856	9.70836	3.74364	0.0530204	0.369705	MSMEG_0939	MSMEG_0939
-0.954458	9.75206	3.74128	0.0530952	0.369705	MSMEG_5246	MSMEG_5246
2.64521	6.82856	3.72769	0.053529	0.370783	ahpD	MSMEG_4890
1.05919	9.59096	3.72626	0.0535746	0.370783	rpsE	MSMEG_1472
1.48189	8.39791	3.71728	0.0538636	0.370783	lysS	MSMEG_6094
5.55927	5.74481	3.71647	0.0538898	0.370783	MSMEG_3919	MSMEG_3919
-3.73403	4.47526	3.71083	0.0540721	0.370783	MSMEG_5762	MSMEG_5762
5.57699	5.62576	3.70677	0.0542036	0.370783	MSMEG_4658	MSMEG_4658
1.89933	7.03986	3.70555	0.0542434	0.370783	MSMEG_2366	MSMEG_2366
5.5181	5.83557	3.7041	0.0542904	0.370783	MSMEG_4724	MSMEG_4724
-1.47023	7.4318	3.70392	0.0542964	0.370783	rpsF	MSMEG_6897
5.48427	5.91477	3.70295	0.054328	0.370783	MSMEG_0664	MSMEG_0664
1.30719	8.88515	3.69989	0.0544275	0.370783	MSMEG_5925	MSMEG_5925
-1.4577	8.00535	3.69871	0.054466	0.370783	MSMEG_3935	MSMEG_3935
2.76473	6.49096	3.69813	0.0544851	0.370783	MSMEG_0066	MSMEG_0066
5.49291	5.88841	3.69703	0.0545209	0.370783	deoC	MSMEG_0922
5.50055	5.86589	3.69548	0.0545715	0.370783	MSMEG_6644	MSMEG_6644
5.56386	5.65618	3.69324	0.0546448	0.370783	MSMEG_1900	MSMEG_1900
-2.69288	5.14487	3.69229	0.054676	0.370783	MSMEG_3511	MSMEG_3511
5.5751	5.51312	3.68856	0.0547984	0.370783	MSMEG_1175	MSMEG_1175
-2.24966	5.76518	3.68656	0.0548643	0.370783	MSMEG_0484	MSMEG_0484
1.73873	7.95619	3.68595	0.0548842	0.370783	groEL	MSMEG_1583
1.28175	8.83141	3.68529	0.0549059	0.370783	MSMEG_4940	MSMEG_4940
-2.75641	4.7891	3.6833	0.0549714	0.370783	MSMEG_5961	MSMEG_5961
5.56423	5.60384	3.68041	0.0550669	0.370783	MSMEG_0562	MSMEG_0562
-0.900855	10.2737	3.67866	0.0551246	0.370783	glgC	MSMEG_5078
5.56375	5.61043	3.67817	0.055141	0.370783	MSMEG_0886	MSMEG_0886
1.88423	7.08768	3.66775	0.0554867	0.372597	MSMEG_4241	MSMEG_4241
5.55743	5.60425	3.65725	0.0558375	0.37444	MSMEG_2039	MSMEG_2039
5.55342	5.6066	3.65292	0.0559828	0.374901	MSMEG_6789	MSMEG_6789
-3.23028	4.7734	3.64682	0.056188	0.375639	MSMEG_5113	MSMEG_5113
2.05318	6.75641	3.64423	0.0562756	0.375639	MSMEG_5696	MSMEG_5696
-2.70999	4.74496	3.64283	0.0563229	0.375639	MSMEG_0504	MSMEG_0504
5.53043	5.6355	3.63467	0.0565996	0.376558	MSMEG_6480	MSMEG_6480
2.00046	6.99115	3.63352	0.0566386	0.376558	MSMEG_2624	MSMEG_2624
5.45003	5.91307	3.63198	0.0566911	0.376558	MSMEG_1144	MSMEG_1144
2.74993	6.47565	3.6287	0.056803	0.376694	MSMEG_3536	MSMEG_3536
5.52554	5.66568	3.62648	0.0568787	0.376694	MSMEG_2124	MSMEG_2124
5.4997	5.76378	3.62428	0.0569538	0.376694	MSMEG_6336	MSMEG_6336
-0.884698	10.6291	3.62015	0.0570953	0.376694	MSMEG_1821	MSMEG_1821
5.53213	5.60164	3.61876	0.0571431	0.376694	MSMEG_1926	MSMEG_1926
-3.7242	4.66771	3.61542	0.057258	0.376694	MSMEG_1865	MSMEG_1865
-1.12789	8.90691	3.61362	0.0573201	0.376694	MSMEG_0669	MSMEG_0669
5.54	5.47318	3.61343	0.0573264	0.376694	MSMEG_3762	MSMEG_3762
1.97938	7.13835	3.60909	0.0574762	0.377173	MSMEG_6483	MSMEG_6483
5.52237	5.59545	3.59775	0.0578697	0.379248	bluB	MSMEG_6053
5.51733	5.60046	3.58813	0.0582054	0.380648	MSMEG_6038	MSMEG_6038
2.71865	6.5066	3.58637	0.0582671	0.380648	MSMEG_4124	MSMEG_4124
1.63517	7.99411	3.58288	0.0583895	0.380648	purQ	MSMEG_5831
5.48067	5.74245	3.58276	0.058394	0.380648	MSMEG_4502	MSMEG_4502
1.98388	7.0098	3.57463	0.0586802	0.382005	MSMEG_5262	MSMEG_5262
5.50945	5.51624	3.5692	0.0588726	0.382273	MSMEG_0551	MSMEG_0551
-0.996639	9.33858	3.56907	0.0588772	0.382273	ndh	MSMEG_3621
-2.47584	5.66002	3.55983	0.0592055	0.38253	MSMEG_3202	MSMEG_3202
5.49944	5.60293	3.55892	0.0592382	0.38253	MSMEG_1894	MSMEG_1894
2.79207	6.35218	3.55886	0.0592403	0.38253	purH	MSMEG_5515
5.49966	5.58556	3.55633	0.0593306	0.38253	MSMEG_5728	MSMEG_5728
2.23036	6.71342	3.55583	0.0593486	0.38253	MSMEG_1722	MSMEG_1722
1.68331	7.7406	3.55481	0.059385	0.38253	MSMEG_5007	MSMEG_5007
5.48851	5.64031	3.55139	0.0595075	0.382816	MSMEG_5291	MSMEG_5291
-1.60371	6.78512	3.5459	0.0597048	0.383582	MSMEG_2661	MSMEG_2661
1.51067	8.17905	3.53258	0.060186	0.385595	MSMEG_5079	MSMEG_5079
0.996471	9.98149	3.531	0.0602433	0.385595	MSMEG_2401	MSMEG_2401
1.27121	8.78711	3.5307	0.0602541	0.385595	MSMEG_4528	MSMEG_4528
5.45773	5.72994	3.52652	0.0604062	0.386064	MSMEG_2521	MSMEG_2521
5.48377	5.50177	3.52303	0.0605335	0.386374	MSMEG_0700	MSMEG_0700
5.43767	5.7703	3.51496	0.0608289	0.387619	MSMEG_1934	MSMEG_1934
5.47278	5.59413	3.51339	0.0608866	0.387619	MSMEG_5008	MSMEG_5008
2.76268	6.37198	3.50908	0.0610451	0.388124	MSMEG_4313	MSMEG_4313
1.97065	6.94937	3.50547	0.0611785	0.388467	MSMEG_1927	MSMEG_1927
5.44963	5.67024	3.48979	0.0617603	0.390555	selD	MSMEG_1852
-2.12755	6.21328	3.48932	0.0617777	0.390555	MSMEG_3391	MSMEG_3391
1.57448	7.903	3.48851	0.0618081	0.390555	MSMEG_0938	MSMEG_0938
-1.56275	6.71553	3.48803	0.0618259	0.390555	MSMEG_2115	MSMEG_2115
-1.00755	9.33994	3.48209	0.0620482	0.391427	MSMEG_6130	MSMEG_6130
2.17028	6.84822	3.4791	0.0621607	0.391427	moaC	MSMEG_5703
5.44963	5.63364	3.47795	0.0622036	0.391427	MSMEG_6520	MSMEG_6520
2.60199	6.68207	3.46516	0.0626863	0.39381	MSMEG_3226	MSMEG_3226
1.65261	7.85366	3.46367	0.0627429	0.39381	MSMEG_2736	MSMEG_2736
1.97516	6.86179	3.45323	0.0631402	0.395646	MSMEG_4692	MSMEG_4692
-2.52423	5.71236	3.45175	0.0631968	0.395646	MSMEG_2672	MSMEG_2672
2.79953	6.267	3.44839	0.0633254	0.395945	MSMEG_1638	MSMEG_1638
1.93059	7.19496	3.44132	0.0635968	0.397136	MSMEG_1133	MSMEG_1133
2.68632	6.46935	3.42956	0.0640512	0.399203	MSMEG_5568	MSMEG_5568
1.03793	9.41475	3.42854	0.0640907	0.399203	MSMEG_1738	MSMEG_1738
5.4269	5.49207	3.42457	0.064245	0.399656	MSMEG_1180	MSMEG_1180
2.19341	6.70503	3.42052	0.0644027	0.399851	MSMEG_0239	MSMEG_0239
2.75129	6.33646	3.41685	0.064546	0.399851	MSMEG_6821	MSMEG_6821
5.42082	5.49208	3.41631	0.0645672	0.399851	MSMEG_2749	MSMEG_2749
5.26378	6.05821	3.4091	0.0648499	0.399851	MSMEG_1775	MSMEG_1775
5.41666	5.46656	3.40754	0.064911	0.399851	MSMEG_6604	MSMEG_6604
5.41945	5.5219	3.4064	0.0649559	0.399851	MSMEG_0355	MSMEG_0355
2.64813	6.52206	3.40563	0.0649865	0.399851	MSMEG_5938	MSMEG_5938
2.61775	6.5986	3.40519	0.0650038	0.399851	MSMEG_1145	MSMEG_1145
5.37694	5.76594	3.40264	0.0651041	0.399851	MSMEG_4762	MSMEG_4762
1.68659	7.56088	3.4014	0.0651531	0.399851	MSMEG_1918	MSMEG_1918
2.65451	6.50625	3.40013	0.0652033	0.399851	MSMEG_0987	MSMEG_0987
5.27353	6.01528	3.39882	0.0652552	0.399851	MSMEG_0330	MSMEG_0330
-1.78249	6.39906	3.39465	0.0654202	0.400334	MSMEG_5237	MSMEG_5237
-1.84089	6.38457	3.39269	0.065498	0.400334	MSMEG_3997	MSMEG_3997
5.37261	5.76246	3.39065	0.065579	0.400334	MSMEG_4178	MSMEG_4178
5.40281	5.57764	3.38805	0.0656827	0.400468	MSMEG_6240	MSMEG_6240
5.40549	5.51654	3.38357	0.0658612	0.401058	MSMEG_2816	MSMEG_2816
5.40129	5.56883	3.37699	0.0661249	0.401828	MSMEG_5735	MSMEG_5735
5.31984	5.88506	3.3746	0.0662208	0.401828	MSMEG_5199	MSMEG_5199
5.39321	5.41013	3.37428	0.0662335	0.401828	MSMEG_1373	MSMEG_1373
5.3868	5.64224	3.36842	0.0664696	0.402761	MSMEG_4365	MSMEG_4365
5.39298	5.44056	3.35974	0.0668207	0.404021	MSMEG_4507	MSMEG_4507
5.38232	5.61544	3.35881	0.0668583	0.404021	MSMEG_3964	MSMEG_3964
-1.39274	7.67764	3.35649	0.0669529	0.404021	MSMEG_3328	MSMEG_3328
1.27552	8.67737	3.35437	0.0670391	0.404021	metK	MSMEG_3055
5.38976	5.47245	3.35299	0.067095	0.404021	MSMEG_2433	MSMEG_2433
1.92267	7.00847	3.35111	0.0671719	0.404021	MSMEG_3810	MSMEG_3810
1.66618	7.39647	3.34061	0.0676017	0.406107	MSMEG_1635	MSMEG_1635
2.16558	6.70983	3.32662	0.068179	0.409074	glpK	MSMEG_6229
5.37186	5.49778	3.32445	0.0682689	0.409112	MSMEG_2935	MSMEG_2935
5.3735	5.5322	3.32196	0.0683725	0.409233	MSMEG_6136	MSMEG_6136
5.3596	5.60934	3.31463	0.0686781	0.40983	MSMEG_2064	MSMEG_2064
5.36522	5.46163	3.31341	0.068729	0.40983	MSMEG_5877	MSMEG_5877
1.5683	8.00442	3.31278	0.0687553	0.40983	MSMEG_1954	MSMEG_1954
5.36614	5.47037	3.31155	0.0688066	0.40983	MSMEG_0830	MSMEG_0830
1.16	8.97097	3.30858	0.0689314	0.410075	dnaN	MSMEG_0001
1.89169	7.41851	3.30489	0.069086	0.410496	aceA	MSMEG_0911
-0.891294	9.98271	3.29894	0.0693369	0.411041	MSMEG_0409	MSMEG_0409
1.65801	7.72313	3.29218	0.0696227	0.411041	MSMEG_0035	MSMEG_0035
5.33555	5.68666	3.29168	0.0696438	0.411041	MSMEG_2468	MSMEG_2468
5.35164	5.48827	3.29088	0.0696777	0.411041	MSMEG_5866	MSMEG_5866
1.59042	8.04463	3.29059	0.0696904	0.411041	ilvB	MSMEG_2372
5.34623	5.61727	3.28906	0.069755	0.411041	MSMEG_4257	MSMEG_4257
2.08929	6.98574	3.28884	0.0697646	0.411041	MSMEG_1621	MSMEG_1621
5.3434	5.42784	3.28664	0.0698582	0.411098	MSMEG_3415	MSMEG_3415
5.31401	5.7292	3.2784	0.0702094	0.411855	MSMEG_6018	MSMEG_6018
2.10851	6.86627	3.27679	0.0702783	0.411855	MSMEG_3160	MSMEG_3160
5.34011	5.57285	3.27663	0.0702852	0.411855	MSMEG_1298	MSMEG_1298
5.34088	5.4865	3.27576	0.0703228	0.411855	MSMEG_4855	MSMEG_4855
0.956437	9.84286	3.26627	0.0707306	0.413749	MSMEG_5127	MSMEG_5127
-1.82131	6.38939	3.25817	0.0710806	0.414764	MSMEG_4133	MSMEG_4133
-1.92415	6.23323	3.25731	0.0711178	0.414764	MSMEG_2660	MSMEG_2660
-2.62669	4.91168	3.25639	0.0711581	0.414764	MSMEG_1906	MSMEG_1906
5.31368	5.64776	3.25112	0.0713868	0.415603	MSMEG_5280	MSMEG_5280
2.0342	7.88443	3.24522	0.0716442	0.415618	MSMEG_0540	MSMEG_0540
-1.36274	7.84301	3.2438	0.0717063	0.415618	MSMEG_6307	MSMEG_6307
5.29707	5.72572	3.24364	0.0717133	0.415618	MSMEG_4678	MSMEG_4678
2.64937	6.40574	3.24152	0.0718064	0.415618	MSMEG_3145	MSMEG_3145
2.73708	6.24559	3.24136	0.0718131	0.415618	MSMEG_5418	MSMEG_5418
5.31481	5.62199	3.23754	0.0719808	0.416097	MSMEG_5955	MSMEG_5955
2.69219	6.32067	3.22938	0.0723402	0.417681	recC	MSMEG_1328
-2.39452	4.96964	3.22678	0.0724553	0.417854	MSMEG_6230	MSMEG_6230
2.73077	6.2472	3.21739	0.072872	0.419213	MSMEG_0129	MSMEG_0129
5.3068	5.56427	3.21736	0.0728733	0.419213	MSMEG_1655	MSMEG_1655
2.67394	6.34041	3.2157	0.0729475	0.419213	MSMEG_1623	MSMEG_1623
5.26504	5.79438	3.21147	0.0731359	0.419804	MSMEG_4635	MSMEG_4635
1.62493	7.87791	3.20231	0.0735466	0.420386	MSMEG_1366	MSMEG_1366
-1.06624	8.95141	3.20184	0.0735678	0.420386	MSMEG_1869	MSMEG_1869
5.28627	5.6355	3.20071	0.0736185	0.420386	eda	MSMEG_0312
5.29412	5.58895	3.20048	0.0736289	0.420386	MSMEG_1665	MSMEG_1665
2.64481	6.38222	3.19965	0.0736663	0.420386	MSMEG_6198	MSMEG_6198
1.52426	8.11363	3.19536	0.0738599	0.420965	oppD	MSMEG_4997
2.64983	6.36338	3.19153	0.0740329	0.420965	MSMEG_1833	MSMEG_1833
5.29167	5.45544	3.19019	0.0740938	0.420965	MSMEG_3876	MSMEG_3876
1.63238	7.74067	3.18981	0.0741112	0.420965	MSMEG_5060	MSMEG_5060
5.25009	5.77108	3.18754	0.0742141	0.421062	MSMEG_2462	MSMEG_2462
-1.44632	7.2312	3.18128	0.0744989	0.421759	MSMEG_4041	MSMEG_4041
5.10069	6.13433	3.18106	0.074509	0.421759	MSMEG_4742	MSMEG_4742
5.2635	5.33476	3.17006	0.0750119	0.424091	MSMEG_3677	MSMEG_3677
1.67573	7.22693	3.16827	0.0750941	0.424091	MSMEG_4321	MSMEG_4321
5.27588	5.4709	3.16303	0.0753355	0.424965	MSMEG_3602	MSMEG_3602
5.2402	5.73893	3.1573	0.0756005	0.425969	MSMEG_6686	MSMEG_6686
-0.822143	10.7458	3.15281	0.0758087	0.426653	thyA	MSMEG_2670
5.25513	5.41734	3.13422	0.0766774	0.430126	MSMEG_5889	MSMEG_5889
5.26028	5.49109	3.134	0.076688	0.430126	MSMEG_1668	MSMEG_1668
2.69296	6.24136	3.126	0.0770648	0.430126	MSMEG_4199	MSMEG_4199
5.25844	5.49268	3.12568	0.0770802	0.430126	rpmE	MSMEG_4951
5.22092	5.73666	3.12478	0.0771226	0.430126	dapB	MSMEG_3317
5.24162	5.64689	3.12294	0.0772097	0.430126	MSMEG_6062	MSMEG_6062
1.53868	8.1204	3.12217	0.0772464	0.430126	MSMEG_5420	MSMEG_5420
5.20081	5.81125	3.12184	0.0772621	0.430126	MSMEG_5571	MSMEG_5571
5.07884	6.10603	3.12178	0.077265	0.430126	MSMEG_6085	MSMEG_6085
5.24207	5.40212	3.11929	0.0773829	0.430126	MSMEG_4379	MSMEG_4379
5.23125	5.66963	3.11912	0.077391	0.430126	MSMEG_2941	MSMEG_2941
2.0548	6.87298	3.11142	0.0777575	0.431513	MSMEG_6944	MSMEG_6944
2.70512	6.20648	3.11018	0.0778167	0.431513	MSMEG_4289	MSMEG_4289
5.24218	5.47273	3.10674	0.0779814	0.431591	MSMEG_4998	MSMEG_4998
1.66107	7.38983	3.10621	0.0780069	0.431591	MSMEG_0026	MSMEG_0026
5.22606	5.65829	3.09902	0.0783521	0.432547	MSMEG_1227	MSMEG_1227
-1.47852	6.78309	3.09893	0.0783561	0.432547	MSMEG_1132	MSMEG_1132
5.20856	5.30995	3.09079	0.0787491	0.434227	MSMEG_5192	MSMEG_5192
1.44688	8.14957	3.08723	0.0789217	0.43469	MSMEG_0985	MSMEG_0985
2.50791	6.58705	3.08278	0.0791377	0.435112	oppC	MSMEG_4996
2.58493	6.41115	3.08187	0.079182	0.435112	MSMEG_6927	MSMEG_6927
1.85981	6.90496	3.07681	0.0794286	0.435112	MSMEG_2469	MSMEG_2469
-2.30316	4.90962	3.07551	0.0794923	0.435112	MSMEG_2004	MSMEG_2004
1.73162	7.07053	3.07356	0.0795877	0.435112	rpmA	MSMEG_4624
5.19389	5.30218	3.06938	0.0797924	0.435112	xylA	MSMEG_6021
5.21343	5.44093	3.06794	0.079863	0.435112	MSMEG_0882	MSMEG_0882
5.19628	5.68715	3.06665	0.0799263	0.435112	MSMEG_3751	MSMEG_3751
-2.03188	5.92824	3.0665	0.0799337	0.435112	MSMEG_5980	MSMEG_5980
-1.40564	7.51948	3.06601	0.0799582	0.435112	MSMEG_4898	MSMEG_4898
1.36755	8.35496	3.06567	0.0799746	0.435112	MSMEG_5590	MSMEG_5590
1.64975	7.37111	3.06223	0.0801444	0.435236	MSMEG_5939	MSMEG_5939
5.18067	5.73615	3.06086	0.0802118	0.435236	MSMEG_2392	MSMEG_2392
5.18813	5.29634	3.0598	0.0802638	0.435236	MSMEG_4793	MSMEG_4793
1.38062	8.2945	3.05557	0.0804732	0.435889	rplR	MSMEG_1471
-2.7884	4.54174	3.04837	0.0808307	0.437098	MSMEG_4155	MSMEG_4155
2.71355	6.14565	3.04749	0.0808746	0.437098	MSMEG_4555	MSMEG_4555
1.71664	7.19266	3.04418	0.0810397	0.437114	ureC	MSMEG_3625
5.19512	5.38754	3.04181	0.0811577	0.437114	MSMEG_1517	MSMEG_1517
2.64003	6.27546	3.04108	0.0811943	0.437114	MSMEG_4242	MSMEG_4242
1.07827	9.08839	3.04028	0.0812343	0.437114	MSMEG_0061	MSMEG_0061
-2.55866	4.97324	3.03762	0.0813679	0.437352	MSMEG_3410	MSMEG_3410
5.19289	5.5909	3.03136	0.0816822	0.438195	MSMEG_0875	MSMEG_0875
1.6395	7.36844	3.03094	0.0817034	0.438195	MSMEG_3768	MSMEG_3768
2.72211	6.11195	3.02525	0.0819905	0.43899	MSMEG_3512	MSMEG_3512
1.55082	7.77689	3.02351	0.0820783	0.43899	MSMEG_0065	MSMEG_0065
5.19099	5.52088	3.02268	0.0821203	0.43899	gyrB	MSMEG_1229
-2.7511	4.50237	3.01989	0.0822615	0.439266	MSMEG_2234	MSMEG_2234
2.12899	6.55964	3.01602	0.0824583	0.439381	catA	MSMEG_1911
1.26887	8.53972	3.01302	0.0826108	0.439381	MSMEG_0688	MSMEG_0688
1.22827	8.653	3.01061	0.0827336	0.439381	etfA	MSMEG_2352
5.17709	5.42156	3.01052	0.0827384	0.439381	MSMEG_1666	MSMEG_1666
5.17747	5.4806	3.01032	0.0827487	0.439381	MSMEG_4980	MSMEG_4980
5.17955	5.46489	3.0089	0.0828208	0.439381	gatC	MSMEG_2364
5.16769	5.35178	2.99855	0.0833518	0.44172	fabG	MSMEG_2206
2.09299	6.61487	2.99268	0.0836542	0.442454	MSMEG_2360	MSMEG_2360
1.83962	6.88729	2.9908	0.0837515	0.442454	MSMEG_6452	MSMEG_6452
5.16086	5.61805	2.99043	0.0837704	0.442454	MSMEG_1576	MSMEG_1576
2.66445	6.19172	2.98887	0.0838514	0.442454	MSMEG_0892	MSMEG_0892
-2.73493	4.51033	2.98495	0.0840543	0.443048	MSMEG_6668	MSMEG_6668
5.16552	5.55913	2.98253	0.0841801	0.443078	MSMEG_1434	MSMEG_1434
1.86843	6.746	2.98136	0.0842409	0.443078	MSMEG_5414	MSMEG_5414
-1.89679	6.21066	2.97644	0.0844977	0.443484	MSMEG_0593	MSMEG_0593
1.30561	8.58284	2.97641	0.084499	0.443484	MSMEG_0062	MSMEG_0062
1.70874	7.00146	2.97455	0.0845963	0.44352	MSMEG_2174	MSMEG_2174
5.11818	5.27028	2.96538	0.0850772	0.445565	MSMEG_4253	MSMEG_4253
2.52373	6.44173	2.95884	0.085422	0.446528	MSMEG_1608	MSMEG_1608
-2.30237	5.42484	2.95843	0.0854434	0.446528	MSMEG_0650	MSMEG_0650
5.14096	5.58012	2.95061	0.0858577	0.44711	MSMEG_6601	MSMEG_6601
-2.71809	4.51705	2.94998	0.0858914	0.44711	MSMEG_5997	MSMEG_5997
5.14357	5.53009	2.94996	0.0858925	0.44711	MSMEG_1925	MSMEG_1925
1.41976	8.00937	2.94932	0.0859266	0.44711	MSMEG_2839	MSMEG_2839
-2.11608	5.74413	2.94617	0.0860938	0.44711	MSMEG_2006	MSMEG_2006
5.10895	5.25237	2.94602	0.086102	0.44711	MSMEG_1213	MSMEG_1213
1.47041	8.06149	2.93791	0.0865354	0.448744	coaA	MSMEG_5252
2.46377	6.56034	2.93657	0.0866069	0.448744	MSMEG_0216	MSMEG_0216
1.61225	7.30056	2.93363	0.0867649	0.448744	MSMEG_2259	MSMEG_2259
-1.54907	6.59611	2.9333	0.0867828	0.448744	MSMEG_0795	MSMEG_0795
5.04594	5.91494	2.92909	0.0870093	0.448967	putP	MSMEG_5303
-1.11091	8.63994	2.92811	0.0870621	0.448967	MSMEG_0070	MSMEG_0070
-2.0883	6.02338	2.92739	0.0871006	0.448967	MSMEG_2958	MSMEG_2958
5.0994	5.67047	2.9147	0.0877885	0.451333	MSMEG_4208	MSMEG_4208
-2.74296	4.62226	2.91455	0.0877965	0.451333	MSMEG_0471	MSMEG_0471
5.12439	5.49526	2.91383	0.0878359	0.451333	MSMEG_2071	MSMEG_2071
1.4516	7.97299	2.91177	0.0879479	0.451435	cysS	MSMEG_6074
-1.49735	6.55024	2.90753	0.0881794	0.45215	MSMEG_2445	MSMEG_2445
0.90866	9.59707	2.90391	0.0883778	0.452321	tig	MSMEG_4674
5.11	5.40843	2.90071	0.0885532	0.452321	MSMEG_3660	MSMEG_3660
5.10736	5.47673	2.8983	0.0886855	0.452321	MSMEG_6361	MSMEG_6361
5.10578	5.60624	2.89824	0.088689	0.452321	MSMEG_1904	MSMEG_1904
5.10659	5.45659	2.89803	0.0887008	0.452321	MSMEG_5161	MSMEG_5161
1.6738	7.21647	2.894	0.0889226	0.452321	MSMEG_6109	MSMEG_6109
0.913944	9.65788	2.89349	0.0889506	0.452321	MSMEG_4535	MSMEG_4535
1.67183	7.0004	2.89349	0.088951	0.452321	MSMEG_3596	MSMEG_3596
5.09841	5.37074	2.89086	0.0890961	0.45259	MSMEG_2698	MSMEG_2698
1.3933	8.18561	2.88622	0.0893532	0.452942	MSMEG_2739	MSMEG_2739
2.08503	6.54265	2.88509	0.0894155	0.452942	MSMEG_5835	MSMEG_5835
2.57523	6.27987	2.8846	0.0894427	0.452942	MSMEG_0092	MSMEG_0092
1.78836	6.95792	2.86274	0.0906659	0.457122	nadD	MSMEG_4581
5.02414	5.85533	2.8619	0.090713	0.457122	MSMEG_5863	MSMEG_5863
-2.47374	4.9896	2.86184	0.0907162	0.457122	MSMEG_4297	MSMEG_4297
-1.35171	7.09982	2.86152	0.0907343	0.457122	MSMEG_3856	MSMEG_3856
5.07687	5.37848	2.85999	0.0908208	0.457122	MSMEG_5942	MSMEG_5942
2.01904	6.69628	2.85339	0.0911943	0.457122	MSMEG_6315	MSMEG_6315
5.07326	5.3823	2.85334	0.091197	0.457122	MSMEG_3983	MSMEG_3983
5.05832	5.29732	2.85217	0.0912635	0.457122	MSMEG_5825	MSMEG_5825
2.57176	6.25684	2.85177	0.0912864	0.457122	MSMEG_5594	MSMEG_5594
5.04382	5.76008	2.85083	0.0913396	0.457122	MSMEG_3381	MSMEG_3381
5.04985	5.74988	2.84941	0.09142	0.457122	MSMEG_0983	MSMEG_0983
5.08106	5.52248	2.84913	0.0914364	0.457122	pntA	MSMEG_4109
-2.38037	4.81502	2.84835	0.0914803	0.457122	MSMEG_1912	MSMEG_1912
1.50141	7.50723	2.84058	0.0919236	0.458466	pgm	MSMEG_2136
5.04161	5.27605	2.84036	0.0919364	0.458466	MSMEG_3850	MSMEG_3850
-1.27968	7.05697	2.83448	0.0922734	0.459679	MSMEG_6642	MSMEG_6642
-2.16279	5.61268	2.83076	0.0924871	0.460276	MSMEG_0545	MSMEG_0545
-2.0012	5.79928	2.82639	0.0927392	0.460701	MSMEG_2083	MSMEG_2083
5.0162	5.21706	2.82602	0.0927605	0.460701	MSMEG_0281	MSMEG_0281
-1.96413	5.97107	2.82302	0.092934	0.460949	MSMEG_6877	MSMEG_6877
5.02316	5.76459	2.82191	0.0929985	0.460949	MSMEG_2164	MSMEG_2164
5.04834	5.5745	2.8111	0.0936272	0.46338	MSMEG_5834	MSMEG_5834
5.04138	5.36352	2.81022	0.093678	0.46338	MSMEG_0607	MSMEG_0607
5.05371	5.45705	2.80765	0.0938287	0.463563	MSMEG_4384	MSMEG_4384
4.99936	5.2064	2.80239	0.0941366	0.463563	MSMEG_3014	MSMEG_3014
5.01275	5.2633	2.80198	0.094161	0.463563	MSMEG_1698	MSMEG_1698
5.00355	5.19812	2.80144	0.0941925	0.463563	MSMEG_4564	MSMEG_4564
1.75599	7.10196	2.7998	0.0942889	0.463563	MSMEG_5267	MSMEG_5267
5.04251	5.62536	2.79769	0.0944132	0.463563	MSMEG_1220	MSMEG_1220
1.52384	7.79823	2.79689	0.0944604	0.463563	gabD2	MSMEG_5912
5.02819	5.66983	2.7967	0.0944715	0.463563	MSMEG_5443	MSMEG_5443
5.03692	5.40914	2.79173	0.0947647	0.464421	MSMEG_2534	MSMEG_2534
-0.981277	8.97277	2.79053	0.0948358	0.464421	MSMEG_1937	MSMEG_1937
0.825409	12.369	2.78839	0.0949624	0.464569	tuf	MSMEG_1401
1.23137	8.60796	2.78677	0.0950581	0.464569	atpC	MSMEG_4935
5.02237	5.667	2.78522	0.0951503	0.464569	MSMEG_1892	MSMEG_1892
1.16083	8.64841	2.7801	0.0954549	0.465592	pyrH	MSMEG_2540
5.03152	5.48172	2.77701	0.0956394	0.465685	bioA	MSMEG_3188
2.0252	6.60934	2.77644	0.0956735	0.465685	MSMEG_2648	MSMEG_2648
5.00942	5.32472	2.77338	0.0958564	0.465685	panC	MSMEG_6097
4.98378	5.18574	2.77324	0.095865	0.465685	MSMEG_0518	MSMEG_0518
-2.44378	4.86802	2.77162	0.0959617	0.465685	MSMEG_6274	MSMEG_6274
5.01091	5.33406	2.77012	0.0960516	0.465685	MSMEG_2645	MSMEG_2645
0.85881	9.89578	2.76867	0.096139	0.465685	MSMEG_6935	MSMEG_6935
4.98571	5.75807	2.76126	0.0965849	0.467032	MSMEG_0991	MSMEG_0991
-2.6941	4.71499	2.76052	0.0966298	0.467032	MSMEG_0474	MSMEG_0474
5.01859	5.54962	2.75898	0.0967227	0.467032	MSMEG_3822	MSMEG_3822
-1.32717	7.36226	2.75773	0.0967982	0.467032	MSMEG_6815	MSMEG_6815
4.9722	5.77701	2.75207	0.0971413	0.467398	MSMEG_3962	MSMEG_3962
4.99413	5.31505	2.74997	0.097269	0.467398	MSMEG_6297	MSMEG_6297
2.07824	6.45947	2.74946	0.0972998	0.467398	pstS	MSMEG_5782
2.02924	6.56236	2.7459	0.0975169	0.467398	MSMEG_3638	MSMEG_3638
4.94075	5.87713	2.74569	0.0975298	0.467398	MSMEG_6788	MSMEG_6788
2.03696	6.54768	2.74548	0.0975428	0.467398	MSMEG_1647	MSMEG_1647
1.33799	8.12343	2.74273	0.0977107	0.467398	MSMEG_5442	MSMEG_5442
1.51265	7.76666	2.74196	0.0977576	0.467398	MSMEG_3163	MSMEG_3163
4.97996	5.29273	2.74003	0.0978755	0.467398	MSMEG_4170	MSMEG_4170
5.00296	5.4583	2.73612	0.0981154	0.467398	MSMEG_1080	MSMEG_1080
-1.3736	6.84309	2.73566	0.0981437	0.467398	MSMEG_1792	MSMEG_1792
2.61901	6.08153	2.73521	0.0981716	0.467398	MSMEG_3106	MSMEG_3106
1.63079	7.19879	2.73303	0.0983053	0.467398	MSMEG_5940	MSMEG_5940
1.80775	6.70899	2.73094	0.0984342	0.467398	MSMEG_4963	MSMEG_4963
4.97304	5.25023	2.73033	0.0984716	0.467398	MSMEG_0434	MSMEG_0434
4.98748	5.66063	2.72984	0.0985018	0.467398	amiF	MSMEG_3403
4.99646	5.50096	2.72877	0.0985681	0.467398	MSMEG_3382	MSMEG_3382
1.2329	8.59599	2.72719	0.0986654	0.467398	MSMEG_2107	MSMEG_2107
-2.48151	5.17663	2.72596	0.0987416	0.467398	MSMEG_1977	MSMEG_1977
-1.44104	6.64857	2.72532	0.0987809	0.467398	MSMEG_6309	MSMEG_6309
4.9541	5.23173	2.72123	0.0990344	0.467746	MSMEG_3090	MSMEG_3090
4.97819	5.33735	2.71818	0.0992236	0.467746	MSMEG_4928	MSMEG_4928
4.95197	5.22832	2.71655	0.0993253	0.467746	hutH	MSMEG_1183
1.75824	6.87204	2.71453	0.0994512	0.467746	msrB	MSMEG_2784
4.98632	5.4188	2.71335	0.0995249	0.467746	MSMEG_2225	MSMEG_2225
-1.47973	6.70715	2.71305	0.0995433	0.467746	MSMEG_3959	MSMEG_3959
4.96101	5.27982	2.71082	0.0996824	0.467746	MSMEG_6023	MSMEG_6023
1.26759	8.32803	2.70866	0.0998176	0.467746	MSMEG_1353	MSMEG_1353
4.98636	5.53682	2.70854	0.0998253	0.467746	MSMEG_4302	MSMEG_4302
4.93028	5.16561	2.70734	0.0999003	0.467746	MSMEG_0614	MSMEG_0614
1.93473	6.82891	2.70728	0.0999041	0.467746	MSMEG_5044	MSMEG_5044
1.63017	7.00953	2.70568	0.100004	0.467746	thrB	MSMEG_4955
4.97901	5.44191	2.7034	0.100147	0.467746	MSMEG_2793	MSMEG_2793
1.08801	8.88007	2.70271	0.10019	0.467746	MSMEG_1341	MSMEG_1341
4.95375	5.7217	2.69932	0.100404	0.468297	MSMEG_0741	MSMEG_0741
-1.16825	8.06154	2.6947	0.100695	0.468597	MSMEG_1540	MSMEG_1540
4.94267	5.24038	2.69352	0.10077	0.468597	MSMEG_5786	MSMEG_5786
4.97599	5.59778	2.69308	0.100798	0.468597	MSMEG_0145	MSMEG_0145
4.93573	5.21729	2.69224	0.100851	0.468597	MSMEG_6220	MSMEG_6220
1.61527	7.58838	2.68979	0.101006	0.468873	MSMEG_1451	MSMEG_1451
-0.76635	10.2538	2.68827	0.101102	0.468877	MSMEG_5968	MSMEG_5968
-1.32606	7.11864	2.6856	0.101272	0.468964	MSMEG_0369	MSMEG_0369
4.96208	5.38767	2.68375	0.10139	0.468964	MSMEG_4827	MSMEG_4827
4.9373	5.23466	2.68346	0.101408	0.468964	rpmG	MSMEG_1339
1.7613	6.79543	2.67651	0.101851	0.47057	pth	MSMEG_5432
4.95124	5.38229	2.67214	0.102131	0.471304	MSMEG_6296	MSMEG_6296
4.94351	5.34032	2.67077	0.10222	0.471304	MSMEG_3904	MSMEG_3904
-1.12941	8.29773	2.66863	0.102357	0.471304	MSMEG_3248	MSMEG_3248
4.92114	5.77635	2.66804	0.102395	0.471304	MSMEG_4400	MSMEG_4400
2.59931	6.04191	2.66565	0.102549	0.47157	MSMEG_4349	MSMEG_4349
0.972611	9.13533	2.66179	0.102798	0.471736	atpG	MSMEG_4937
4.94313	5.36058	2.6583	0.103023	0.471736	MSMEG_3650	MSMEG_3650
4.93888	5.64431	2.65579	0.103186	0.471736	MSMEG_4473	MSMEG_4473
4.9453	5.46714	2.65385	0.103312	0.471736	MSMEG_4338	MSMEG_4338
4.91276	5.24177	2.6537	0.103322	0.471736	MSMEG_1067	MSMEG_1067
1.3504	8.09636	2.65352	0.103334	0.471736	MSMEG_6193	MSMEG_6193
-2.02523	5.77606	2.65268	0.103388	0.471736	MSMEG_6181	MSMEG_6181
4.94305	5.42144	2.6515	0.103465	0.471736	MSMEG_5166	MSMEG_5166
1.60272	7.37759	2.65124	0.103482	0.471736	MSMEG_4281	MSMEG_4281
4.943	5.4444	2.64897	0.10363	0.471736	MSMEG_0262	MSMEG_0262
4.92522	5.30841	2.64636	0.1038	0.471736	MSMEG_0961	MSMEG_0961
4.90283	5.81546	2.64557	0.103852	0.471736	mscL	MSMEG_5482
4.89681	5.20353	2.64549	0.103857	0.471736	MSMEG_5088	MSMEG_5088
4.90988	5.23461	2.64434	0.103932	0.471736	MSMEG_6553	MSMEG_6553
2.05177	6.43339	2.64251	0.104052	0.471843	MSMEG_3812	MSMEG_3812
-1.75806	6.0766	2.63903	0.10428	0.472442	MSMEG_1769	MSMEG_1769
1.48077	7.29947	2.636	0.104479	0.472629	MSMEG_3128	MSMEG_3128
4.91491	5.30642	2.63535	0.104522	0.472629	MSMEG_6063	MSMEG_6063
2.53121	6.15624	2.634	0.104611	0.472629	MSMEG_6250	MSMEG_6250
4.92532	5.40039	2.63	0.104875	0.473385	MSMEG_4047	MSMEG_4047
4.9165	5.63639	2.62634	0.105117	0.474041	MSMEG_6435	MSMEG_6435
4.86413	5.13379	2.62262	0.105364	0.474395	MSMEG_0431	MSMEG_0431
-1.01733	8.73587	2.62014	0.105528	0.474395	MSMEG_4084	MSMEG_4084
4.86221	5.13248	2.61978	0.105552	0.474395	MSMEG_0212	MSMEG_0212
1.40408	7.90983	2.618	0.105671	0.474395	MSMEG_1547	MSMEG_1547
1.99629	6.53771	2.61545	0.105841	0.474395	MSMEG_0080	MSMEG_0080
1.13545	8.75578	2.61403	0.105935	0.474395	MSMEG_5895	MSMEG_5895
1.47601	7.31422	2.61206	0.106067	0.474395	map	MSMEG_2587
1.3953	7.99289	2.6118	0.106084	0.474395	MSMEG_0138	MSMEG_0138
4.85505	5.12915	2.61079	0.106152	0.474395	ehuC	MSMEG_5369
1.93277	6.70551	2.61057	0.106166	0.474395	MSMEG_6278	MSMEG_6278
4.91838	5.51913	2.60883	0.106283	0.474395	MSMEG_6234	MSMEG_6234
4.90889	5.39392	2.60773	0.106357	0.474395	MSMEG_2972	MSMEG_2972
0.802233	12.8222	2.6035	0.106641	0.474877	MSMEG_0402	MSMEG_0402
0.901469	9.42294	2.6024	0.106715	0.474877	rplA	MSMEG_1347
1.56924	7.96049	2.60086	0.106818	0.474877	tpx	MSMEG_3479
4.90599	5.41869	2.60036	0.106852	0.474877	MSMEG_5522	MSMEG_5522
4.90885	5.59614	2.59844	0.106982	0.475024	MSMEG_6772	MSMEG_6772
-1.18894	8.06836	2.59374	0.107299	0.476001	MSMEG_5242	MSMEG_5242
4.88916	5.33952	2.58712	0.107749	0.476617	ureB	MSMEG_3626
1.93737	6.66203	2.58665	0.107781	0.476617	MSMEG_5695	MSMEG_5695
-1.84621	6.08918	2.58659	0.107785	0.476617	MSMEG_3838	MSMEG_3838
4.8316	5.12201	2.58544	0.107863	0.476617	MSMEG_0182	MSMEG_0182
-2.40978	5.17134	2.58314	0.10802	0.476617	MSMEG_2299	MSMEG_2299
1.73159	6.8014	2.58031	0.108213	0.476617	MSMEG_4559	MSMEG_4559
-1.72919	6.08054	2.58008	0.108229	0.476617	MSMEG_2665	MSMEG_2665
1.89848	6.78732	2.57995	0.108238	0.476617	MSMEG_5345	MSMEG_5345
4.86581	5.28142	2.57752	0.108404	0.476617	MSMEG_0624	MSMEG_0624
4.8754	5.28928	2.57743	0.10841	0.476617	MSMEG_6012	MSMEG_6012
-2.38799	5.12073	2.57531	0.108556	0.476662	MSMEG_6134	MSMEG_6134
4.87491	5.33001	2.57371	0.108666	0.476662	pyrC	MSMEG_3044
-1.96259	5.84032	2.57303	0.108712	0.476662	MSMEG_3273	MSMEG_3273
-0.767691	10.1181	2.56969	0.108942	0.476902	grpE	MSMEG_0710
-2.16414	5.5221	2.56795	0.109062	0.476902	MSMEG_2149	MSMEG_2149
4.87573	5.68142	2.56608	0.109191	0.476902	MSMEG_6355	MSMEG_6355
4.87922	5.38616	2.56401	0.109334	0.476902	MSMEG_4314	MSMEG_4314
4.81526	5.112	2.56276	0.10942	0.476902	MSMEG_6641	MSMEG_6641
2.00227	6.47486	2.56257	0.109433	0.476902	MSMEG_0140	MSMEG_0140
1.17114	8.59348	2.56185	0.109483	0.476902	rpsT	MSMEG_4571
4.85715	5.262	2.56095	0.109545	0.476902	MSMEG_4144	MSMEG_4144
1.23461	8.35681	2.55865	0.109705	0.477175	argS	MSMEG_4959
4.86341	5.67865	2.55622	0.109874	0.477262	MSMEG_0363	MSMEG_0363
4.82898	5.16785	2.5544	0.11	0.477262	MSMEG_3244	MSMEG_3244
4.84179	5.22467	2.55274	0.110116	0.477262	MSMEG_3454	MSMEG_3454
1.42351	7.76218	2.55112	0.110229	0.477262	purK	MSMEG_1819
-0.750115	11.9714	2.55021	0.110293	0.477262	MSMEG_2826	MSMEG_2826
1.68782	6.98805	2.54725	0.110499	0.477262	MSMEG_4647	MSMEG_4647
2.4984	6.14771	2.54553	0.11062	0.477262	MSMEG_4695	MSMEG_4695
4.80297	5.10419	2.54516	0.110646	0.477262	MSMEG_6464	MSMEG_6464
4.82179	5.19132	2.5446	0.110685	0.477262	MSMEG_5610	MSMEG_5610
1.59698	6.90316	2.54368	0.110749	0.477262	MSMEG_3883	MSMEG_3883
-1.46015	6.60656	2.54288	0.110805	0.477262	MSMEG_1929	MSMEG_1929
-2.1185	5.34363	2.54162	0.110894	0.477262	MSMEG_0015	MSMEG_0015
4.85582	5.67126	2.53996	0.111011	0.477346	MSMEG_2505	MSMEG_2505
1.92199	6.65333	2.53556	0.111321	0.477982	MSMEG_2381	MSMEG_2381
-0.734959	10.772	2.53509	0.111354	0.477982	MSMEG_6127	MSMEG_6127
-0.741166	10.7605	2.53266	0.111525	0.47818	MSMEG_1254	MSMEG_1254
4.84145	5.31624	2.53048	0.111679	0.47818	MSMEG_0993	MSMEG_0993
4.83477	5.27183	2.53029	0.111692	0.47818	murI	MSMEG_4903
4.81328	5.19651	2.52703	0.111924	0.478341	MSMEG_6790	MSMEG_6790
1.69396	6.89784	2.52585	0.112007	0.478341	MSMEG_6919	MSMEG_6919
4.80822	5.18336	2.52563	0.112023	0.478341	MSMEG_3998	MSMEG_3998
-1.97431	5.76084	2.52336	0.112184	0.478612	MSMEG_3336	MSMEG_3336
4.80379	5.15589	2.52198	0.112282	0.478616	MSMEG_3412	MSMEG_3412
1.11378	8.65955	2.51774	0.112585	0.479488	lepB	MSMEG_2441
4.84276	5.3587	2.5154	0.112752	0.479755	MSMEG_0739	MSMEG_0739
0.82556	9.8832	2.51412	0.112843	0.479755	fabG	MSMEG_3150
1.4459	7.3726	2.50909	0.113204	0.480461	MSMEG_6363	MSMEG_6363
1.56447	7.15629	2.50907	0.113205	0.480461	MSMEG_2932	MSMEG_2932
4.77522	5.08898	2.50771	0.113303	0.480461	MSMEG_1597	MSMEG_1597
4.80957	5.77732	2.50586	0.113436	0.48061	MSMEG_3594	MSMEG_3594
4.53539	6.53134	2.50259	0.113672	0.480685	MSMEG_1299	MSMEG_1299
4.81436	5.26161	2.50198	0.113716	0.480685	MSMEG_5106	MSMEG_5106
4.83263	5.36081	2.50118	0.113774	0.480685	MSMEG_0367	MSMEG_0367
4.82425	5.31678	2.50007	0.113854	0.480685	MSMEG_1384	MSMEG_1384
-1.05752	8.63733	2.49882	0.113944	0.480685	MSMEG_4900	MSMEG_4900
1.96595	6.49737	2.49605	0.114145	0.481019	MSMEG_5873	MSMEG_5873
1.68123	6.89742	2.49424	0.114276	0.481019	MSMEG_0858	MSMEG_0858
4.83351	5.60556	2.49367	0.114318	0.481019	MSMEG_3259	MSMEG_3259
1.88629	6.71822	2.49166	0.114464	0.481219	MSMEG_3040	MSMEG_3040
4.83127	5.45504	2.48819	0.114717	0.481869	MSMEG_4715	MSMEG_4715
1.40267	7.39985	2.48441	0.114992	0.482614	MSMEG_0025	MSMEG_0025
0.771712	10.3259	2.48279	0.115111	0.482699	rplC	MSMEG_1436
4.81947	5.45859	2.47148	0.115942	0.485289	MSMEG_1431	MSMEG_1431
-2.47464	4.60224	2.46903	0.116122	0.485289	MSMEG_0497	MSMEG_0497
-2.47464	4.60224	2.46903	0.116122	0.485289	MSMEG_2297	MSMEG_2297
4.76832	5.15921	2.46765	0.116225	0.485289	MSMEG_3705	MSMEG_3705
1.43429	7.76439	2.4666	0.116302	0.485289	MSMEG_0933	MSMEG_0933
4.81494	5.48966	2.46632	0.116323	0.485289	MSMEG_3600	MSMEG_3600
4.77289	5.21819	2.4635	0.116532	0.48542	MSMEG_3521	MSMEG_3521
-2.28199	5.01413	2.46284	0.116581	0.48542	MSMEG_6780	MSMEG_6780
4.81255	5.42221	2.46165	0.116669	0.48542	MSMEG_2644	MSMEG_2644
1.66761	6.92316	2.46042	0.116761	0.48542	recG	MSMEG_2403
1.68558	6.8366	2.45852	0.116901	0.48542	MSMEG_5341	MSMEG_5341
4.74715	5.13469	2.45789	0.116948	0.48542	MSMEG_2546	MSMEG_2546
4.79093	5.31241	2.45622	0.117073	0.485526	MSMEG_5277	MSMEG_5277
1.26191	8.21628	2.45433	0.117214	0.4857	MSMEG_5419	MSMEG_5419
4.80068	5.40815	2.45157	0.11742	0.486115	MSMEG_1486	MSMEG_1486
4.78804	5.32289	2.45006	0.117533	0.486115	MSMEG_6588	MSMEG_6588
1.27784	8.21316	2.44901	0.117612	0.486115	trpS	MSMEG_1657
4.80401	5.4655	2.4427	0.118086	0.486685	MSMEG_2467	MSMEG_2467
4.7963	5.40488	2.44238	0.11811	0.486685	MSMEG_4125	MSMEG_4125
4.7916	5.36341	2.442	0.118138	0.486685	MSMEG_5612	MSMEG_5612
4.79634	5.43644	2.43911	0.118357	0.486685	dnaE2	MSMEG_1633
4.7444	5.1238	2.43897	0.118367	0.486685	MSMEG_0042	MSMEG_0042
-2.38241	5.41364	2.43696	0.118519	0.486685	MSMEG_5216	MSMEG_5216
-1.58914	6.43675	2.43641	0.11856	0.486685	MSMEG_4058	MSMEG_4058
4.77256	5.28312	2.43545	0.118633	0.486685	MSMEG_5769	MSMEG_5769
4.75473	5.20663	2.43531	0.118643	0.486685	otsB	MSMEG_6043
4.77052	5.29562	2.43311	0.11881	0.486962	MSMEG_3452	MSMEG_3452
1.06202	8.82655	2.43031	0.119023	0.487426	MSMEG_4254	MSMEG_4254
4.70288	5.05588	2.41885	0.119896	0.488781	MSMEG_4517	MSMEG_4517
4.76007	5.30754	2.41619	0.1201	0.488781	MSMEG_1581	MSMEG_1581
4.76409	5.30093	2.41564	0.120142	0.488781	MSMEG_2042	MSMEG_2042
4.73137	5.177	2.41488	0.1202	0.488781	MSMEG_4663	MSMEG_4663
1.20357	8.23861	2.41475	0.12021	0.488781	MSMEG_0932	MSMEG_0932
1.3536	7.52176	2.41372	0.120289	0.488781	engA	MSMEG_3738
4.69166	5.05499	2.4135	0.120306	0.488781	MSMEG_2380	MSMEG_2380
4.7157	5.1168	2.41334	0.120318	0.488781	MSMEG_3851	MSMEG_3851
4.78006	5.56385	2.41334	0.120319	0.488781	MSMEG_1985	MSMEG_1985
4.75726	5.30656	2.41292	0.120351	0.488781	MSMEG_0179	MSMEG_0179
-0.851561	9.21783	2.40615	0.120872	0.490271	MSMEG_1640	MSMEG_1640
4.7237	5.17376	2.40556	0.120918	0.490271	MSMEG_5536	MSMEG_5536
1.90206	6.57438	2.40339	0.121086	0.490547	MSMEG_5413	MSMEG_5413
1.8332	6.80959	2.39907	0.12142	0.491458	MSMEG_3237	MSMEG_3237
4.73698	5.27108	2.39541	0.121705	0.491458	MSMEG_2421	MSMEG_2421
1.38045	7.62591	2.39515	0.121725	0.491458	cysW	MSMEG_4531
1.69849	6.68389	2.39198	0.121972	0.491458	MSMEG_6741	MSMEG_6741
4.67886	5.04563	2.39102	0.122047	0.491458	MSMEG_6322	MSMEG_6322
-2.2164	4.94538	2.38953	0.122164	0.491458	MSMEG_0354	MSMEG_0354
-1.19454	7.49364	2.38909	0.122198	0.491458	MSMEG_5422	MSMEG_5422
-2.17768	4.89492	2.38821	0.122267	0.491458	MSMEG_4565	MSMEG_4565
1.32296	7.85171	2.38626	0.122419	0.491458	MSMEG_4142	MSMEG_4142
4.75713	5.45825	2.38578	0.122457	0.491458	MSMEG_0790	MSMEG_0790
4.73911	5.31944	2.38576	0.122459	0.491458	cobU	MSMEG_4274
2.44002	6.10611	2.38299	0.122675	0.491458	MSMEG_2554	MSMEG_2554
-1.23542	7.11885	2.38272	0.122697	0.491458	MSMEG_5188	MSMEG_5188
1.19591	8.34055	2.3825	0.122714	0.491458	carB	MSMEG_3047
4.75117	5.50767	2.37748	0.123109	0.492487	MSMEG_6368	MSMEG_6368
-1.99858	5.54544	2.37601	0.123224	0.492487	MSMEG_1791	MSMEG_1791
1.8542	6.67516	2.37304	0.12346	0.492487	argD	MSMEG_3773
4.65603	5.03933	2.37304	0.12346	0.492487	hisI	MSMEG_3212
0.810404	9.76611	2.37222	0.123525	0.492487	typA	MSMEG_5132
4.72017	5.26263	2.37159	0.123574	0.492487	MSMEG_4355	MSMEG_4355
-2.66447	5.5552	2.36476	0.124116	0.494227	MSMEG_3947	MSMEG_3947
1.67247	6.74618	2.36355	0.124212	0.494227	MSMEG_0347	MSMEG_0347
1.88195	6.58491	2.36228	0.124313	0.494229	MSMEG_0975	MSMEG_0975
4.70585	5.25881	2.35801	0.124654	0.49453	MSMEG_4119	MSMEG_4119
4.73865	5.53289	2.35792	0.124662	0.49453	MSMEG_6908	MSMEG_6908
4.71345	5.26968	2.35664	0.124763	0.49453	MSMEG_2688	MSMEG_2688
1.2699	7.97611	2.3553	0.124871	0.49453	map	MSMEG_1485
4.651	5.03177	2.35402	0.124974	0.49453	MSMEG_4610	MSMEG_4610
2.44026	6.0769	2.3532	0.125039	0.49453	MSMEG_2766	MSMEG_2766
4.7019	5.2465	2.3521	0.125127	0.49453	MSMEG_1074	MSMEG_1074
4.68633	5.17729	2.35083	0.12523	0.49453	cbiM	MSMEG_2607
4.66928	5.11766	2.34998	0.125297	0.49453	MSMEG_5712	MSMEG_5712
4.72156	5.3763	2.34473	0.12572	0.494925	MSMEG_4713	MSMEG_4713
4.71105	5.32763	2.34438	0.125749	0.494925	MSMEG_6750	MSMEG_6750
-2.04046	5.58048	2.34153	0.125979	0.494925	MSMEG_4132	MSMEG_4132
1.44282	7.6787	2.33953	0.126141	0.494925	MSMEG_3125	MSMEG_3125
4.7192	5.42648	2.33941	0.12615	0.494925	MSMEG_2507	MSMEG_2507
-1.27985	7.1707	2.33845	0.126228	0.494925	MSMEG_4065	MSMEG_4065
0.881942	9.29394	2.33792	0.126271	0.494925	MSMEG_0639	MSMEG_0639
4.7159	5.58832	2.33761	0.126296	0.494925	MSMEG_6197	MSMEG_6197
4.71003	5.31066	2.33749	0.126306	0.494925	MSMEG_3844	MSMEG_3844
-1.24749	7.6232	2.33496	0.126511	0.495104	MSMEG_3254	MSMEG_3254
1.68908	6.65037	2.33362	0.12662	0.495104	MSMEG_6179	MSMEG_6179
4.68388	5.20456	2.33319	0.126655	0.495104	MSMEG_4027	MSMEG_4027
-1.98168	5.47645	2.32737	0.127129	0.495718	cysE	MSMEG_5947
4.62255	5.0214	2.32661	0.127191	0.495718	MSMEG_1763	MSMEG_1763
1.43905	7.44942	2.32378	0.127423	0.495718	MSMEG_2248	MSMEG_2248
4.69135	5.67789	2.32195	0.127573	0.495718	MSMEG_4118	MSMEG_4118
4.69473	5.31089	2.32189	0.127578	0.495718	MSMEG_4779	MSMEG_4779
-1.98236	5.86538	2.32149	0.127611	0.495718	MSMEG_1184	MSMEG_1184
1.38895	7.21712	2.32025	0.127713	0.495718	argH	MSMEG_3769
4.67287	5.20033	2.32019	0.127717	0.495718	MSMEG_5913	MSMEG_5913
4.64295	5.12014	2.32014	0.127722	0.495718	MSMEG_5920	MSMEG_5920
4.60858	5.01684	2.31572	0.128085	0.496482	MSMEG_2896	MSMEG_2896
4.71222	5.49477	2.31445	0.12819	0.496482	MSMEG_4969	MSMEG_4969
0.926341	9.11778	2.31394	0.128231	0.496482	glyS	MSMEG_4485
4.70049	5.60165	2.31118	0.12846	0.496482	MSMEG_3386	MSMEG_3386
4.68092	5.28559	2.31029	0.128533	0.496482	rpmD	MSMEG_1473
4.64882	5.13838	2.30626	0.128867	0.496482	MSMEG_0629	MSMEG_0629
-2.01683	5.38166	2.30623	0.128869	0.496482	ligC	MSMEG_6304
1.84133	6.64344	2.30442	0.129019	0.496482	MSMEG_6407	MSMEG_6407
4.59811	5.0122	2.30402	0.129053	0.496482	MSMEG_3817	MSMEG_3817
4.66154	5.20936	2.30348	0.129097	0.496482	MSMEG_6842	MSMEG_6842
1.20323	8.18323	2.30335	0.129108	0.496482	MSMEG_3155	MSMEG_3155
4.62775	5.07688	2.30304	0.129134	0.496482	MSMEG_6572	MSMEG_6572
1.66907	6.6788	2.30137	0.129273	0.496627	MSMEG_4280	MSMEG_4280
2.40799	6.08087	2.29123	0.130119	0.498622	MSMEG_3497	MSMEG_3497
0.822512	9.55997	2.29089	0.130148	0.498622	thiC	MSMEG_0826
1.43649	7.06729	2.29061	0.130172	0.498622	MSMEG_1945	MSMEG_1945
1.4907	7.53082	2.28762	0.130423	0.498622	MSMEG_4115	MSMEG_4115
4.62977	5.15464	2.28547	0.130604	0.498622	MSMEG_1810	MSMEG_1810
2.4206	6.04846	2.28544	0.130606	0.498622	MSMEG_0404	MSMEG_0404
2.41733	6.05106	2.28462	0.130675	0.498622	MSMEG_3500	MSMEG_3500
4.63849	5.79032	2.28217	0.130881	0.498622	MSMEG_5405	MSMEG_5405
-2.39507	4.69415	2.28204	0.130893	0.498622	rarD	MSMEG_5462
-2.0498	5.16468	2.28176	0.130917	0.498622	MSMEG_4003	MSMEG_4003
4.63465	5.18756	2.2807	0.131006	0.498622	MSMEG_2464	MSMEG_2464
4.61163	5.10537	2.28062	0.131013	0.498622	MSMEG_0334	MSMEG_0334
2.39426	6.09953	2.27849	0.131192	0.498763	MSMEG_0958	MSMEG_0958
4.65043	5.26307	2.27775	0.131255	0.498763	MSMEG_3196	MSMEG_3196
1.42398	7.18924	2.27556	0.13144	0.498763	MSMEG_4723	MSMEG_4723
1.37633	7.20364	2.27537	0.131457	0.498763	MSMEG_0464	MSMEG_0464
4.65595	5.30822	2.2734	0.131623	0.499008	MSMEG_6538	MSMEG_6538
2.38733	6.09918	2.26641	0.132219	0.500877	MSMEG_2073	MSMEG_2073
1.05293	8.6976	2.25929	0.132828	0.502796	MSMEG_6511	MSMEG_6511
4.58319	5.05897	2.2533	0.133343	0.504162	MSMEG_0055	MSMEG_0055
4.57886	5.05828	2.2527	0.133394	0.504162	cobG	MSMEG_3871
1.28987	7.71923	2.2508	0.133558	0.504393	MSMEG_4237	MSMEG_4237
-1.99428	5.0665	2.24711	0.133877	0.504895	MSMEG_1314	MSMEG_1314
4.59241	5.11784	2.24688	0.133897	0.504895	MSMEG_3499	MSMEG_3499
-2.30932	4.55447	2.24095	0.134411	0.506043	MSMEG_0232	MSMEG_0232
4.5491	4.9887	2.23996	0.134498	0.506043	MSMEG_1332	MSMEG_1332
1.47422	7.29545	2.23932	0.134553	0.506043	MSMEG_3765	MSMEG_3765
4.57623	5.0896	2.23763	0.1347	0.506043	MSMEG_1626	MSMEG_1626
4.62973	5.66255	2.23731	0.134728	0.506043	MSMEG_1150	MSMEG_1150
1.7774	6.79264	2.23554	0.134883	0.506043	MSMEG_0446	MSMEG_0446
-2.14873	5.0052	2.23492	0.134937	0.506043	MSMEG_2598	MSMEG_2598
4.59765	5.1717	2.23377	0.135037	0.506043	MSMEG_2447	MSMEG_2447
2.27912	6.30703	2.2327	0.135131	0.506043	MSMEG_4721	MSMEG_4721
1.7848	6.75398	2.23005	0.135362	0.506202	MSMEG_1394	MSMEG_1394
4.62537	5.31652	2.22985	0.13538	0.506202	MSMEG_4856	MSMEG_4856
2.36483	6.1094	2.22525	0.135783	0.506753	MSMEG_3576	MSMEG_3576
1.29878	7.49055	2.22483	0.135821	0.506753	scpA	MSMEG_3742
-2.37815	4.73989	2.22464	0.135837	0.506753	MSMEG_1160	MSMEG_1160
4.62178	5.59989	2.22165	0.136101	0.507032	MSMEG_6723	MSMEG_6723
4.55706	5.07025	2.2207	0.136184	0.507032	MSMEG_3161	MSMEG_3161
-1.19313	7.07203	2.21987	0.136258	0.507032	MSMEG_1351	MSMEG_1351
0.903507	9.11866	2.2191	0.136326	0.507032	MSMEG_5136	MSMEG_5136
4.60039	5.25897	2.21633	0.13657	0.507555	MSMEG_5647	MSMEG_5647
1.25643	7.84778	2.21502	0.136686	0.507601	MSMEG_3884	MSMEG_3884
4.54071	5.04247	2.21088	0.137053	0.508437	MSMEG_4509	MSMEG_4509
4.60861	5.31922	2.20803	0.137307	0.508437	MSMEG_2409	MSMEG_2409
1.85931	6.49231	2.20752	0.137352	0.508437	hisS	MSMEG_2976
-2.1646	5.07475	2.20729	0.137373	0.508437	MSMEG_5993	MSMEG_5993
4.58448	5.22032	2.20665	0.137429	0.508437	MSMEG_2475	MSMEG_2475
4.57294	5.16111	2.20152	0.137887	0.509566	MSMEG_6632	MSMEG_6632
-2.12585	4.98037	2.20091	0.137942	0.509566	MSMEG_0514	MSMEG_0514
2.27042	6.29514	2.19728	0.138268	0.510382	MSMEG_2481	MSMEG_2481
4.6073	5.4385	2.19492	0.138479	0.510581	MSMEG_5777	MSMEG_5777
4.60851	5.41333	2.19436	0.13853	0.510581	MSMEG_0120	MSMEG_0120
4.55839	5.15676	2.18993	0.138928	0.511392	MSMEG_3678	MSMEG_3678
4.50808	4.97065	2.18958	0.13896	0.511392	MSMEG_3278	MSMEG_3278
-1.70021	6.22866	2.18844	0.139063	0.511392	MSMEG_1116	MSMEG_1116
4.51618	5.03223	2.18432	0.139435	0.512226	MSMEG_5519	MSMEG_5519
4.58287	5.28551	2.18362	0.139499	0.512226	tag	MSMEG_5082
4.60434	5.45623	2.18177	0.139667	0.51246	MSMEG_1158	MSMEG_1158
1.85988	6.45558	2.17577	0.140212	0.513284	MSMEG_1479	MSMEG_1479
1.56766	6.96742	2.17511	0.140272	0.513284	tesB	MSMEG_2938
4.52409	5.06702	2.17483	0.140298	0.513284	MSMEG_4282	MSMEG_4282
-0.707431	10.0662	2.17439	0.140338	0.513284	MSMEG_6942	MSMEG_6942
0.917896	9.04483	2.17355	0.140415	0.513284	MSMEG_1340	MSMEG_1340
4.54138	5.13807	2.17066	0.140678	0.513694	MSMEG_3603	MSMEG_3603
4.54328	5.1281	2.17003	0.140737	0.513694	MSMEG_4538	MSMEG_4538
-2.44007	5.00055	2.16658	0.141053	0.51424	MSMEG_1983	MSMEG_1983
1.76638	6.72456	2.16533	0.141167	0.51424	MSMEG_4129	MSMEG_4129
1.50649	6.75192	2.16349	0.141336	0.51424	MSMEG_3634	MSMEG_3634
4.5213	5.0886	2.16327	0.141356	0.51424	MSMEG_0374	MSMEG_0374
4.53832	5.14824	2.16268	0.141411	0.51424	MSMEG_6807	MSMEG_6807
4.5093	5.08464	2.15526	0.142095	0.515689	MSMEG_1446	MSMEG_1446
-1.6795	5.87737	2.15469	0.142148	0.515689	MSMEG_3409	MSMEG_3409
1.46449	6.97161	2.15128	0.142464	0.515689	MSMEG_3637	MSMEG_3637
-2.28712	4.64095	2.15099	0.142491	0.515689	MSMEG_4764	MSMEG_4764
4.53263	5.16653	2.15017	0.142567	0.515689	MSMEG_2041	MSMEG_2041
1.79366	6.60554	2.14964	0.142617	0.515689	MSMEG_2620	MSMEG_2620
4.56711	5.41361	2.14874	0.1427	0.515689	MSMEG_5346	MSMEG_5346
1.38975	7.09157	2.14796	0.142772	0.515689	MSMEG_5770	MSMEG_5770
-0.780295	9.34489	2.14693	0.142868	0.515689	era	MSMEG_4493
4.54427	5.23321	2.145	0.143048	0.515689	MSMEG_5006	MSMEG_5006
4.54839	5.27329	2.14437	0.143107	0.515689	MSMEG_2110	MSMEG_2110
4.55086	5.29454	2.1434	0.143197	0.515689	MSMEG_4113	MSMEG_4113
4.4953	5.04336	2.1429	0.143244	0.515689	MSMEG_5038	MSMEG_5038
1.06048	8.52669	2.14144	0.14338	0.515689	obgE	MSMEG_4623
4.49821	5.05583	2.14136	0.143387	0.515689	MSMEG_6217	MSMEG_6217
4.54812	5.30022	2.13823	0.143681	0.516063	MSMEG_5372	MSMEG_5372
-1.15794	7.08419	2.138	0.143702	0.516063	MSMEG_5774	MSMEG_5774
-1.43441	6.47419	2.13554	0.143932	0.516512	MSMEG_1066	MSMEG_1066
1.33117	7.81403	2.13309	0.144163	0.51661	MSMEG_1617	MSMEG_1617
-1.9611	5.55596	2.13235	0.144232	0.51661	MSMEG_0352	MSMEG_0352
-2.28494	4.66614	2.13189	0.144276	0.51661	MSMEG_0231	MSMEG_0231
4.49029	5.07645	2.13016	0.144439	0.516817	MSMEG_2043	MSMEG_2043
4.47165	5.01287	2.12572	0.144858	0.517755	MSMEG_6338	MSMEG_6338
-0.752354	9.4952	2.12473	0.144951	0.517755	MSMEG_1642	MSMEG_1642
-1.21565	7.00414	2.12402	0.145018	0.517755	nadA	MSMEG_3199
4.44318	4.9431	2.12032	0.145369	0.518449	MSMEG_2436	MSMEG_2436
-1.7166	6.1118	2.11974	0.145424	0.518449	MSMEG_5719	MSMEG_5719
4.48549	5.11691	2.11438	0.145934	0.518655	MSMEG_0720	MSMEG_0720
1.04437	8.56027	2.11308	0.146058	0.518655	MSMEG_0836	MSMEG_0836
1.91326	6.2758	2.11223	0.146139	0.518655	MSMEG_1702	MSMEG_1702
1.37242	7.21121	2.10926	0.146423	0.518655	MSMEG_2349	MSMEG_2349
1.14235	8.17582	2.10782	0.146561	0.518655	MSMEG_5225	MSMEG_5225
4.5264	5.30842	2.10693	0.146646	0.518655	MSMEG_6061	MSMEG_6061
4.50562	5.22214	2.10629	0.146708	0.518655	MSMEG_6041	MSMEG_6041
4.50597	5.1879	2.10532	0.1468	0.518655	MSMEG_6340	MSMEG_6340
1.32655	7.36933	2.10485	0.146846	0.518655	MSMEG_5709	MSMEG_5709
1.3418	6.95783	2.10461	0.146869	0.518655	MSMEG_3056	MSMEG_3056
4.47718	5.07016	2.10367	0.146959	0.518655	pcaH	MSMEG_2601
2.29208	6.14329	2.10269	0.147053	0.518655	MSMEG_4631	MSMEG_4631
2.30667	6.09846	2.1023	0.147091	0.518655	murG	MSMEG_4227
4.43104	4.93839	2.10013	0.147299	0.518655	MSMEG_3240	MSMEG_3240
2.36821	5.95885	2.09935	0.147374	0.518655	MSMEG_0375	MSMEG_0375
-1.81987	5.57779	2.09804	0.147501	0.518655	MSMEG_2675	MSMEG_2675
1.58614	6.7197	2.09668	0.147632	0.518655	MSMEG_3465	MSMEG_3465
0.758554	9.81705	2.09607	0.147692	0.518655	purL	MSMEG_5824
-1.5411	6.10404	2.09559	0.147737	0.518655	MSMEG_2267	MSMEG_2267
4.42596	4.93623	2.09525	0.14777	0.518655	MSMEG_2502	MSMEG_2502
4.47457	5.12402	2.09339	0.14795	0.518655	MSMEG_3111	MSMEG_3111
4.44047	5.00023	2.09311	0.147977	0.518655	MSMEG_4697	MSMEG_4697
4.42343	4.93516	2.09283	0.148005	0.518655	cdd	MSMEG_1673
4.46028	5.06415	2.09177	0.148107	0.518655	MSMEG_4990	MSMEG_4990
4.41547	4.93115	2.09157	0.148127	0.518655	MSMEG_1847	MSMEG_1847
4.48785	5.1698	2.08934	0.148343	0.519009	MSMEG_2156	MSMEG_2156
-1.81507	5.54188	2.08835	0.148439	0.519009	MSMEG_5473	MSMEG_5473
-1.40115	6.3528	2.08424	0.148839	0.519618	MSMEG_5506	MSMEG_5506
4.47147	5.14355	2.08352	0.148909	0.519618	MSMEG_6465	MSMEG_6465
2.29321	6.11059	2.08329	0.148932	0.519618	MSMEG_3656	MSMEG_3656
4.45763	5.10544	2.07979	0.149274	0.52009	MSMEG_0813	MSMEG_0813
0.706665	10.2476	2.07842	0.149408	0.52009	MSMEG_0024	MSMEG_0024
0.799528	9.50525	2.07812	0.149437	0.52009	MSMEG_5775	MSMEG_5775
-1.47031	6.43765	2.07558	0.149685	0.52009	MSMEG_1165	MSMEG_1165
-1.12028	7.77381	2.07546	0.149698	0.52009	MSMEG_0383	MSMEG_0383
4.43654	5.03108	2.0754	0.149703	0.52009	MSMEG_5445	MSMEG_5445
1.56261	6.77892	2.07356	0.149884	0.520141	MSMEG_0753	MSMEG_0753
4.447	5.05877	2.07155	0.150082	0.520141	MSMEG_3503	MSMEG_3503
4.49659	5.31423	2.07013	0.150221	0.520141	MSMEG_3389	MSMEG_3389
4.39509	4.92236	2.07001	0.150233	0.520141	MSMEG_0898	MSMEG_0898
1.31268	7.33945	2.06985	0.150249	0.520141	xth	MSMEG_1656
-1.89553	5.79782	2.06785	0.150446	0.520457	MSMEG_5964	MSMEG_5964
1.43871	6.9241	2.06364	0.150862	0.521219	MSMEG_0924	MSMEG_0924
4.44019	5.0773	2.06347	0.150879	0.521219	hutU	MSMEG_1179
0.916473	8.92605	2.06165	0.15106	0.521409	MSMEG_5892	MSMEG_5892
0.760063	9.70093	2.06008	0.151215	0.521409	MSMEG_6105	MSMEG_6105
1.4217	7.12824	2.05969	0.151253	0.521409	hisD	MSMEG_3205
2.19601	6.30611	2.05697	0.151524	0.521778	MSMEG_0698	MSMEG_0698
4.48338	5.69514	2.05617	0.151604	0.521778	MSMEG_0967	MSMEG_0967
1.87244	6.30958	2.0554	0.15168	0.521778	deoA	MSMEG_1675
4.43733	5.09728	2.05336	0.151883	0.522111	MSMEG_4398	MSMEG_4398
-2.00027	5.42822	2.04726	0.152494	0.52262	MSMEG_6670	MSMEG_6670
-1.88795	5.05299	2.04706	0.152513	0.52262	MSMEG_0746	MSMEG_0746
-1.10563	7.76732	2.04675	0.152544	0.52262	leuD	MSMEG_2388
4.4254	5.0928	2.04544	0.152676	0.52262	MSMEG_1275	MSMEG_1275
4.45203	5.17772	2.04539	0.152681	0.52262	MSMEG_0876	MSMEG_0876
2.33917	5.94447	2.04407	0.152813	0.52262	MSMEG_6153	MSMEG_6153
4.37594	4.91524	2.04291	0.152929	0.52262	MSMEG_1139	MSMEG_1139
4.42989	5.08456	2.04237	0.152984	0.52262	MSMEG_6215	MSMEG_6215
4.43716	5.13039	2.0423	0.152991	0.52262	MSMEG_0118	MSMEG_0118
-1.30596	6.59527	2.04067	0.153155	0.522819	rfbD	MSMEG_1825
2.26568	6.1243	2.03926	0.153297	0.522904	MSMEG_5064	MSMEG_5064
4.47786	5.3892	2.0383	0.153394	0.522904	MSMEG_4166	MSMEG_4166
-1.35187	6.6027	2.03518	0.153709	0.523378	MSMEG_6266	MSMEG_6266
1.81293	6.42643	2.03469	0.153758	0.523378	recB	MSMEG_1327
1.5472	6.7838	2.03375	0.153853	0.523378	uvrA	MSMEG_6806
2.26463	6.11277	2.03127	0.154105	0.523532	MSMEG_3120	MSMEG_3120
1.67021	6.95917	2.03014	0.154219	0.523532	recR	MSMEG_6279
-0.881485	8.83195	2.02781	0.154456	0.523532	MSMEG_1255	MSMEG_1255
-1.80678	5.3145	2.02704	0.154534	0.523532	MSMEG_6054	MSMEG_6054
0.89562	8.96313	2.02628	0.154611	0.523532	MSMEG_5273	MSMEG_5273
2.31965	5.9733	2.02596	0.154644	0.523532	MSMEG_5437	MSMEG_5437
4.407	5.07587	2.02421	0.154822	0.523532	MSMEG_5790	MSMEG_5790
4.35686	4.907	2.02398	0.154845	0.523532	MSMEG_2021	MSMEG_2021
-1.24172	6.74866	2.02361	0.154883	0.523532	MSMEG_1256	MSMEG_1256
-1.59104	6.32716	2.02212	0.155035	0.523532	MSMEG_5601	MSMEG_5601
4.37921	4.99635	2.02085	0.155165	0.523532	sun	MSMEG_3065
-2.23941	4.73142	2.0207	0.15518	0.523532	MSMEG_6501	MSMEG_6501
1.90665	6.19272	2.01668	0.155591	0.523558	MSMEG_1795	MSMEG_1795
1.40213	7.41619	2.0164	0.15562	0.523558	pta	MSMEG_0783
4.37892	5.00766	2.0162	0.15564	0.523558	MSMEG_5930	MSMEG_5930
4.41836	5.12327	2.01602	0.155659	0.523558	MSMEG_1268	MSMEG_1268
1.59036	6.59696	2.01387	0.15588	0.523558	MSMEG_0226	MSMEG_0226
4.40681	5.13063	2.01175	0.156098	0.523558	MSMEG_3819	MSMEG_3819
-1.0845	7.58696	2.0104	0.156237	0.523558	MSMEG_1780	MSMEG_1780
4.33614	4.89648	2.0098	0.156299	0.523558	MSMEG_4139	MSMEG_4139
-1.73387	5.9598	2.00944	0.156336	0.523558	MSMEG_6490	MSMEG_6490
4.43042	5.22196	2.00825	0.156458	0.523558	MSMEG_2076	MSMEG_2076
-1.98593	5.50423	2.00705	0.156583	0.523558	MSMEG_0476	MSMEG_0476
4.36452	4.96993	2.00693	0.156595	0.523558	MSMEG_5047	MSMEG_5047
4.37834	5.03219	2.00641	0.156649	0.523558	MSMEG_3193	MSMEG_3193
-0.662254	10.5668	2.00608	0.156683	0.523558	MSMEG_2820	MSMEG_2820
1.19786	7.65382	2.00431	0.156866	0.523811	MSMEG_4923	MSMEG_4923
0.831931	9.31882	2.00006	0.157306	0.524513	rpmC	MSMEG_1444
0.733688	9.71343	1.99945	0.157369	0.524513	atpD	MSMEG_4936
4.34735	4.9619	1.99626	0.157701	0.524513	MSMEG_3276	MSMEG_3276
-1.02776	8.08304	1.99512	0.157819	0.524513	MSMEG_2347	MSMEG_2347
4.3718	5.03011	1.99348	0.15799	0.524513	MSMEG_4255	MSMEG_4255
4.32625	4.89407	1.99211	0.158133	0.524513	MSMEG_2100	MSMEG_2100
1.15952	8.14732	1.99174	0.158171	0.524513	MSMEG_0067	MSMEG_0067
2.1617	6.30901	1.99115	0.158233	0.524513	MSMEG_0246	MSMEG_0246
4.3691	5.02906	1.99095	0.158254	0.524513	MSMEG_2681	MSMEG_2681
1.28992	7.14037	1.98999	0.158354	0.524513	MSMEG_3690	MSMEG_3690
1.23769	8.26887	1.98915	0.158442	0.524513	MSMEG_3396	MSMEG_3396
-2.36846	5.8745	1.98719	0.158648	0.524513	MSMEG_1973	MSMEG_1973
-1.80991	5.90649	1.98579	0.158795	0.524513	MSMEG_6863	MSMEG_6863
1.36417	6.83412	1.98435	0.158946	0.524513	MSMEG_0368	MSMEG_0368
1.20875	7.66079	1.98404	0.158978	0.524513	panB	MSMEG_4298
1.54304	6.71735	1.98381	0.159003	0.524513	MSMEG_0941	MSMEG_0941
1.50694	6.90173	1.98299	0.159089	0.524513	rpe	MSMEG_3066
4.38057	5.08873	1.9829	0.159098	0.524513	MSMEG_4339	MSMEG_4339
4.4139	5.22774	1.9828	0.159109	0.524513	MSMEG_4982	MSMEG_4982
-1.00183	8.2187	1.97766	0.15965	0.525942	MSMEG_0637	MSMEG_0637
2.21687	6.16778	1.97593	0.159833	0.526077	MSMEG_6554	MSMEG_6554
-1.97279	4.93273	1.97524	0.159905	0.526077	MSMEG_0503	MSMEG_0503
1.20187	7.84679	1.97031	0.160428	0.527443	MSMEG_1824	MSMEG_1824
2.26558	6.03165	1.96923	0.160542	0.527464	MSMEG_2095	MSMEG_2095
-1.74867	5.85669	1.96571	0.160917	0.528341	MSMEG_1207	MSMEG_1207
4.34992	5.04285	1.96324	0.161179	0.528508	MSMEG_0844	MSMEG_0844
4.29591	4.88072	1.96234	0.161276	0.528508	MSMEG_0126	MSMEG_0126
4.34203	5.0391	1.96168	0.161347	0.528508	MSMEG_4347	MSMEG_4347
4.39905	5.28532	1.95942	0.161588	0.528508	MSMEG_6602	MSMEG_6602
4.34992	5.05428	1.95936	0.161595	0.528508	MSMEG_5171	MSMEG_5171
4.31831	4.97117	1.95917	0.161614	0.528508	MSMEG_1518	MSMEG_1518
4.395	5.26879	1.95201	0.162383	0.529578	MSMEG_3015	MSMEG_3015
4.28427	4.87565	1.95072	0.162522	0.529578	MSMEG_2125	MSMEG_2125
-0.865173	8.85956	1.94872	0.162738	0.529578	MSMEG_5710	MSMEG_5710
-1.65648	5.85313	1.94837	0.162776	0.529578	MSMEG_4308	MSMEG_4308
4.39876	5.31835	1.94829	0.162784	0.529578	MSMEG_5159	MSMEG_5159
1.27463	7.44471	1.94629	0.163	0.529578	MSMEG_4529	MSMEG_4529
-1.92725	5.31224	1.94619	0.163011	0.529578	MSMEG_6310	MSMEG_6310
4.29635	4.94038	1.9455	0.163085	0.529578	MSMEG_1156	MSMEG_1156
4.35415	5.14188	1.94265	0.163393	0.529578	MSMEG_6816	MSMEG_6816
4.37169	5.22241	1.94207	0.163456	0.529578	MSMEG_3665	MSMEG_3665
4.35676	5.15421	1.94189	0.163477	0.529578	MSMEG_2912	MSMEG_2912
4.3945	5.60193	1.94178	0.163488	0.529578	MSMEG_0756	MSMEG_0756
1.21728	7.66354	1.94168	0.163499	0.529578	MSMEG_1920	MSMEG_1920
4.27487	4.87165	1.9411	0.163561	0.529578	MSMEG_4829	MSMEG_4829
-2.31006	5.09372	1.94104	0.163568	0.529578	eda	MSMEG_3788
-1.61735	6.05538	1.9401	0.16367	0.529578	MSMEG_3593	MSMEG_3593
4.35063	5.11059	1.93558	0.164161	0.530817	MSMEG_4073	MSMEG_4073
4.31711	5.0302	1.93065	0.1647	0.531533	truA	MSMEG_1527
1.81341	6.31737	1.93042	0.164725	0.531533	cobB	MSMEG_2617
4.29475	4.94318	1.92962	0.164813	0.531533	MSMEG_0445	MSMEG_0445
4.2716	4.87298	1.92958	0.164817	0.531533	MSMEG_6328	MSMEG_6328
4.26108	4.86548	1.92776	0.165016	0.531552	cobH	MSMEG_3872
4.26927	4.87189	1.92755	0.165039	0.531552	MSMEG_6237	MSMEG_6237
-1.60934	6.05929	1.92621	0.165186	0.531675	MSMEG_3321	MSMEG_3321
1.60877	7.22849	1.9233	0.165506	0.532048	ectB	MSMEG_3900
2.14688	6.26492	1.92318	0.165519	0.532048	MSMEG_0362	MSMEG_0362
-1.98487	5.01074	1.92174	0.165678	0.532211	MSMEG_2099	MSMEG_2099
4.2979	4.97716	1.92052	0.165812	0.532291	pyrB	MSMEG_3043
1.26659	7.26558	1.91941	0.165935	0.532338	MSMEG_2417	MSMEG_2417
4.27277	4.93246	1.91492	0.16643	0.532743	MSMEG_5768	MSMEG_5768
-0.934153	8.46066	1.91403	0.166529	0.532743	MSMEG_3419	MSMEG_3419
4.27925	4.9565	1.91386	0.166548	0.532743	MSMEG_1266	MSMEG_1266
1.04255	8.43879	1.91382	0.166552	0.532743	smc	MSMEG_2423
2.22322	6.06827	1.91335	0.166604	0.532743	MSMEG_3213	MSMEG_3213
1.03827	8.50297	1.91072	0.166895	0.533114	MSMEG_0787	MSMEG_0787
1.19025	7.9992	1.91034	0.166938	0.533114	sdhB	MSMEG_1669
0.92347	8.82361	1.90863	0.167128	0.533373	valS	MSMEG_4630
-1.34036	6.76915	1.90701	0.167309	0.533602	MSMEG_2249	MSMEG_2249
-2.20428	4.84475	1.90247	0.167815	0.534088	MSMEG_5151	MSMEG_5151
-1.84285	5.09647	1.90218	0.167847	0.534088	MSMEG_4304	MSMEG_4304
-1.65999	5.89911	1.90181	0.167888	0.534088	MSMEG_5307	MSMEG_5307
2.27383	5.91515	1.90174	0.167897	0.534088	MSMEG_5399	MSMEG_5399
4.27247	4.95579	1.89916	0.168185	0.534351	MSMEG_5588	MSMEG_5588
4.25611	4.92538	1.89905	0.168198	0.534351	MSMEG_2910	MSMEG_2910
0.731272	9.8106	1.89544	0.168602	0.535289	MSMEG_6382	MSMEG_6382
1.26353	7.06014	1.89443	0.168716	0.535304	MSMEG_5556	MSMEG_5556
4.32125	5.18637	1.88886	0.169344	0.536768	MSMEG_1404	MSMEG_1404
4.22837	4.85426	1.88773	0.169471	0.536768	hisE	MSMEG_4181
4.24423	4.92043	1.88742	0.169506	0.536768	MSMEG_3093	MSMEG_3093
-1.62012	5.87543	1.88496	0.169784	0.536981	MSMEG_0685	MSMEG_0685
0.682731	10.3367	1.88391	0.169903	0.536981	MSMEG_4329	MSMEG_4329
4.28336	5.03992	1.88294	0.170013	0.536981	MSMEG_5804	MSMEG_5804
4.24726	4.92436	1.88199	0.170121	0.536981	MSMEG_6417	MSMEG_6417
4.24726	4.92436	1.88199	0.170121	0.536981	MSMEG_6594	MSMEG_6594
4.22075	4.85126	1.8797	0.170381	0.537185	MSMEG_5301	MSMEG_5301
4.22217	4.85352	1.8794	0.170415	0.537185	MSMEG_5115	MSMEG_5115
-0.842768	8.82722	1.87848	0.170519	0.537185	MSMEG_1424	MSMEG_1424
0.664654	10.6116	1.87672	0.17072	0.537185	MSMEG_6284	MSMEG_6284
1.75653	6.39956	1.8766	0.170733	0.537185	MSMEG_5512	MSMEG_5512
0.822706	9.15807	1.87451	0.170972	0.537592	asd	MSMEG_6256
4.28118	5.08474	1.87263	0.171187	0.537922	MSMEG_6294	MSMEG_6294
0.962463	8.63257	1.87034	0.171449	0.538399	MSMEG_0788	MSMEG_0788
4.33353	5.40369	1.86708	0.171823	0.538882	ald	MSMEG_2659
4.25221	4.98541	1.8667	0.171866	0.538882	MSMEG_3271	MSMEG_3271
4.24396	4.98046	1.86534	0.172022	0.538882	MSMEG_5279	MSMEG_5279
1.79857	6.28859	1.86517	0.172042	0.538882	MSMEG_6662	MSMEG_6662
-1.0574	7.93627	1.86287	0.172306	0.539365	MSMEG_0934	MSMEG_0934
4.2661	5.06763	1.86144	0.172471	0.539366	MSMEG_0441	MSMEG_0441
4.27942	5.095	1.86096	0.172527	0.539366	MSMEG_6337	MSMEG_6337
4.24469	4.98271	1.85873	0.172784	0.539825	MSMEG_3979	MSMEG_3979
4.28416	5.1296	1.85729	0.17295	0.539965	MSMEG_0269	MSMEG_0269
4.22728	4.93757	1.85551	0.173157	0.539965	MSMEG_6620	MSMEG_6620
-0.98762	8.07262	1.85492	0.173225	0.539965	MSMEG_1285	MSMEG_1285
0.760833	9.47449	1.85454	0.173269	0.539965	MSMEG_5427	MSMEG_5427
4.27705	5.14759	1.85081	0.173702	0.540495	MSMEG_6525	MSMEG_6525
-2.02374	5.25858	1.85048	0.17374	0.540495	MSMEG_6878	MSMEG_6878
4.29386	5.19748	1.85022	0.17377	0.540495	MSMEG_3657	MSMEG_3657
4.26331	5.07948	1.84805	0.174023	0.540888	MSMEG_3519	MSMEG_3519
1.39055	6.76679	1.84724	0.174117	0.540888	mnmA	MSMEG_2358
4.2405	4.98336	1.84601	0.174261	0.540992	MSMEG_6224	MSMEG_6224
4.25631	5.04312	1.84434	0.174456	0.541256	MSMEG_6451	MSMEG_6451
4.20282	4.90608	1.83952	0.175019	0.54266	MSMEG_5210	MSMEG_5210
4.25068	5.0438	1.83847	0.175143	0.542699	MSMEG_1561	MSMEG_1561
4.18476	4.83973	1.83603	0.175429	0.542976	MSMEG_3874	MSMEG_3874
1.07945	8.28481	1.83582	0.175454	0.542976	MSMEG_5513	MSMEG_5513
4.17073	4.82937	1.83184	0.175923	0.54327	MSMEG_5946	MSMEG_5946
4.20232	4.92754	1.83135	0.175981	0.54327	MSMEG_0894	MSMEG_0894
1.14355	7.79226	1.83073	0.176054	0.54327	MSMEG_4239	MSMEG_4239
-0.631543	11.3815	1.83062	0.176067	0.54327	treS	MSMEG_6515
2.24727	5.87072	1.83032	0.176103	0.54327	MSMEG_3153	MSMEG_3153
4.17664	4.83667	1.82757	0.176427	0.543685	MSMEG_5194	MSMEG_5194
4.19905	4.90774	1.8273	0.176459	0.543685	MSMEG_0999	MSMEG_0999
1.15923	7.7435	1.82323	0.176941	0.544828	tyrS	MSMEG_3758
4.27494	5.27137	1.82169	0.177125	0.545051	MSMEG_0296	MSMEG_0296
2.18008	6.03886	1.81924	0.177416	0.545365	MSMEG_4722	MSMEG_4722
4.22315	5.01947	1.81585	0.177821	0.545365	MSMEG_3635	MSMEG_3635
4.20841	4.97139	1.81512	0.177908	0.545365	MSMEG_3422	MSMEG_3422
4.21861	5.03063	1.81461	0.177969	0.545365	MSMEG_3365	MSMEG_3365
1.06618	8.24057	1.81366	0.178082	0.545365	MSMEG_6405	MSMEG_6405
4.20575	4.97031	1.81283	0.178181	0.545365	MSMEG_3909	MSMEG_3909
4.27822	5.3293	1.81031	0.178483	0.545365	MSMEG_6225	MSMEG_6225
4.24441	5.14906	1.8093	0.178604	0.545365	MSMEG_0897	MSMEG_0897
4.27161	5.29205	1.80913	0.178625	0.545365	MSMEG_0341	MSMEG_0341
4.18043	4.90084	1.80839	0.178714	0.545365	MSMEG_0989	MSMEG_0989
-1.62833	5.85417	1.80709	0.17887	0.545365	MSMEG_6223	MSMEG_6223
0.834994	9.05034	1.80698	0.178884	0.545365	MSMEG_6257	MSMEG_6257
4.17951	4.92022	1.8046	0.17917	0.545365	MSMEG_5713	MSMEG_5713
4.16593	4.89095	1.80427	0.179209	0.545365	MSMEG_4825	MSMEG_4825
4.16593	4.89095	1.80427	0.179209	0.545365	MSMEG_5808	MSMEG_5808
2.18455	6.00557	1.80258	0.179413	0.545365	sdhC	MSMEG_1672
4.14926	4.82502	1.80168	0.179523	0.545365	MSMEG_4970	MSMEG_4970
4.2102	5.04857	1.80089	0.179618	0.545365	MSMEG_4572	MSMEG_4572
4.14705	4.8239	1.79988	0.179739	0.545365	MSMEG_6799	MSMEG_6799
-1.76197	5.34545	1.79864	0.17989	0.545365	MSMEG_4707	MSMEG_4707
0.675372	10.1432	1.79853	0.179903	0.545365	secA	MSMEG_1881
4.14493	4.82282	1.79819	0.179944	0.545365	MSMEG_2998	MSMEG_2998
-1.29501	6.53815	1.79817	0.179947	0.545365	ctaD	MSMEG_4437
4.19955	4.97084	1.79744	0.180034	0.545365	MSMEG_3733	MSMEG_3733
4.21001	5.06003	1.79733	0.180049	0.545365	MSMEG_1305	MSMEG_1305
-1.92886	5.07141	1.79648	0.180151	0.545365	MSMEG_2489	MSMEG_2489
4.16506	4.91241	1.79582	0.180231	0.545365	MSMEG_6270	MSMEG_6270
1.02095	8.41797	1.79286	0.180591	0.545977	glpK	MSMEG_6756
1.19248	7.40637	1.79155	0.18075	0.545977	MSMEG_0076	MSMEG_0076
2.14881	6.07577	1.79075	0.180848	0.545977	MSMEG_4245	MSMEG_4245
-1.09278	7.05589	1.78956	0.180992	0.545977	MSMEG_4738	MSMEG_4738
2.19697	5.94973	1.78931	0.181022	0.545977	MSMEG_3269	MSMEG_3269
2.16031	6.05736	1.78787	0.181198	0.545977	MSMEG_3501	MSMEG_3501
-1.77225	5.45022	1.78772	0.181217	0.545977	MSMEG_2933	MSMEG_2933
4.26178	5.33221	1.78684	0.181324	0.545977	MSMEG_6004	MSMEG_6004
4.13932	4.87973	1.77954	0.182219	0.547998	MSMEG_2067	MSMEG_2067
4.13932	4.87973	1.77954	0.182219	0.547998	MSMEG_4174	MSMEG_4174
4.14732	4.88736	1.77769	0.182445	0.548342	mgtE	MSMEG_6269
-1.12696	7.2065	1.77521	0.182751	0.548442	MSMEG_6764	MSMEG_6764
1.13857	7.8694	1.77394	0.182908	0.548442	MSMEG_4247	MSMEG_4247
4.1633	4.95445	1.77228	0.183113	0.548442	MSMEG_5493	MSMEG_5493
4.18637	5.06149	1.77153	0.183205	0.548442	MSMEG_6108	MSMEG_6108
0.86149	8.9201	1.77028	0.18336	0.548442	MSMEG_2685	MSMEG_2685
0.689439	9.72845	1.77024	0.183365	0.548442	tsf	MSMEG_2520
4.15096	4.94642	1.76922	0.183492	0.548442	MSMEG_4973	MSMEG_4973
4.23686	5.31449	1.76911	0.183505	0.548442	MSMEG_2666	MSMEG_2666
2.11144	6.14498	1.76894	0.183526	0.548442	MSMEG_1426	MSMEG_1426
4.25256	5.44568	1.76836	0.183597	0.548442	MSMEG_0625	MSMEG_0625
4.10981	4.80801	1.76488	0.18403	0.54887	MSMEG_6718	MSMEG_6718
4.10776	4.80691	1.76327	0.184229	0.54887	MSMEG_5602	MSMEG_5602
-1.1859	6.79789	1.7628	0.184288	0.54887	MSMEG_2595	MSMEG_2595
1.18714	7.08083	1.76269	0.184301	0.54887	MSMEG_1279	MSMEG_1279
4.1526	4.95058	1.76182	0.18441	0.54887	MSMEG_5921	MSMEG_5921
2.22427	5.80129	1.7612	0.184487	0.54887	MSMEG_0333	MSMEG_0333
2.10759	6.15119	1.75932	0.184722	0.54887	MSMEG_0770	MSMEG_0770
2.20103	5.87254	1.75783	0.184908	0.54887	MSMEG_0188	MSMEG_0188
-1.44731	6.17682	1.75692	0.185022	0.54887	MSMEG_3533	MSMEG_3533
1.17994	7.79473	1.75629	0.1851	0.54887	katG	MSMEG_6384
4.178	5.06071	1.75592	0.185147	0.54887	MSMEG_2117	MSMEG_2117
-1.05425	7.11309	1.75559	0.185187	0.54887	MSMEG_0249	MSMEG_0249
4.13602	4.94043	1.75552	0.185196	0.54887	MSMEG_2634	MSMEG_2634
4.09346	4.80048	1.75033	0.185847	0.550134	MSMEG_2179	MSMEG_2179
4.09346	4.80048	1.75033	0.185847	0.550134	MSMEG_2700	MSMEG_2700
-1.84247	5.42573	1.74714	0.186249	0.550145	hisH	MSMEG_3208
4.18737	5.16079	1.74689	0.18628	0.550145	MSMEG_5022	MSMEG_5022
2.17924	5.92211	1.74544	0.186463	0.550145	MSMEG_1360	MSMEG_1360
2.13593	6.04571	1.7453	0.186481	0.550145	MSMEG_2092	MSMEG_2092
-1.92419	5.15862	1.74524	0.186489	0.550145	MSMEG_0470	MSMEG_0470
1.24929	7.57672	1.74496	0.186524	0.550145	hemB	MSMEG_0956
4.18499	5.14242	1.74172	0.186933	0.550572	MSMEG_1418	MSMEG_1418
0.982905	8.45338	1.74158	0.186951	0.550572	MSMEG_6929	MSMEG_6929
1.78835	6.17058	1.7409	0.187037	0.550572	MSMEG_0580	MSMEG_0580
1.14772	7.4115	1.74026	0.187118	0.550572	MSMEG_2370	MSMEG_2370
-1.82648	4.89068	1.73824	0.187374	0.550744	hypC	MSMEG_2274
4.10431	4.86977	1.73803	0.187401	0.550744	MSMEG_0878	MSMEG_0878
1.25567	7.0032	1.73521	0.187759	0.551128	MSMEG_1957	MSMEG_1957
-0.611053	10.84	1.73508	0.187775	0.551128	metH	MSMEG_4185
4.14699	5.04728	1.73434	0.187869	0.551128	MSMEG_0548	MSMEG_0548
1.65597	6.49863	1.73339	0.187991	0.551156	MSMEG_4034	MSMEG_4034
4.19756	5.26464	1.73061	0.188345	0.551808	MSMEG_0439	MSMEG_0439
4.11619	4.93632	1.72884	0.188572	0.551808	MSMEG_3392	MSMEG_3392
2.11826	6.07359	1.72828	0.188642	0.551808	MSMEG_2197	MSMEG_2197
4.09383	4.8657	1.72804	0.188674	0.551808	MSMEG_4306	MSMEG_4306
4.13217	5.02013	1.72697	0.18881	0.551808	MSMEG_5355	MSMEG_5355
1.7202	6.32211	1.72636	0.188889	0.551808	MSMEG_0660	MSMEG_0660
-1.58077	5.89909	1.72372	0.189227	0.552467	MSMEG_1789	MSMEG_1789
2.10984	6.0834	1.72018	0.189683	0.553175	nusB	MSMEG_3036
2.2016	5.78836	1.71812	0.189947	0.553175	MSMEG_1123	MSMEG_1123
1.12283	7.78444	1.71803	0.189959	0.553175	serA	MSMEG_2378
1.14432	7.6015	1.71785	0.189983	0.553175	MSMEG_6385	MSMEG_6385
2.13572	6.00101	1.71745	0.190034	0.553175	MSMEG_6045	MSMEG_6045
1.70619	6.3323	1.71048	0.190936	0.55547	eat	MSMEG_1552
2.0704	6.17036	1.70893	0.191137	0.555726	ehuB	MSMEG_5368
-1.61215	5.88606	1.70763	0.191305	0.555885	MSMEG_5971	MSMEG_5971
4.04507	4.77907	1.70624	0.191487	0.556083	MSMEG_3572	MSMEG_3572
1.48761	6.53176	1.70309	0.191897	0.556675	hup	MSMEG_2389
-2.57542	4.43388	1.7022	0.192013	0.556675	MSMEG_2922	MSMEG_2922
4.06165	4.85046	1.70206	0.192031	0.556675	MSMEG_0950	MSMEG_0950
1.31565	6.87659	1.69877	0.192461	0.55759	ung	MSMEG_2399
-1.60531	5.9029	1.69632	0.192782	0.558173	tpiA	MSMEG_6785
4.0911	4.93145	1.6955	0.19289	0.558173	MSMEG_2964	MSMEG_2964
4.13105	5.11319	1.69443	0.19303	0.558186	MSMEG_5521	MSMEG_5521
4.0892	4.95929	1.69373	0.193122	0.558186	MSMEG_5067	MSMEG_5067
4.07459	4.92025	1.69085	0.193501	0.558584	MSMEG_0181	MSMEG_0181
4.0517	4.84798	1.69026	0.193579	0.558584	MSMEG_3613	MSMEG_3613
1.43455	6.68902	1.68994	0.193621	0.558584	MSMEG_1629	MSMEG_1629
4.0739	4.89629	1.6888	0.193771	0.558584	ureA	MSMEG_3627
-1.18081	6.61217	1.68836	0.193829	0.558584	regX3	MSMEG_0937
4.11509	5.10557	1.68679	0.194038	0.558758	rbsR	MSMEG_6798
-1.08653	6.86041	1.68491	0.194286	0.558758	MSMEG_4683	MSMEG_4683
-2.56409	4.46574	1.68284	0.19456	0.558758	MSMEG_0481	MSMEG_0481
4.14499	5.24241	1.68205	0.194664	0.558758	MSMEG_6007	MSMEG_6007
-1.2028	6.53884	1.6814	0.194751	0.558758	MSMEG_0732	MSMEG_0732
4.09074	5.00823	1.68087	0.194821	0.558758	MSMEG_3118	MSMEG_3118
-2.56542	4.47784	1.68079	0.194832	0.558758	MSMEG_4549	MSMEG_4549
1.1315	7.67324	1.6799	0.19495	0.558758	MSMEG_1516	MSMEG_1516
4.05998	4.87956	1.67964	0.194984	0.558758	amt	MSMEG_6259
-1.15699	6.7873	1.6793	0.195029	0.558758	MSMEG_2626	MSMEG_2626
4.11693	5.12964	1.67637	0.195419	0.559548	MSMEG_6438	MSMEG_6438
4.11686	5.13911	1.67418	0.195712	0.56006	MSMEG_3441	MSMEG_3441
4.07518	4.98096	1.67307	0.19586	0.560155	MSMEG_6303	MSMEG_6303
-1.93317	5.38003	1.67152	0.196068	0.560422	MSMEG_4060	MSMEG_4060
4.10042	5.09033	1.66936	0.196357	0.560565	MSMEG_5054	MSMEG_5054
0.732271	9.41077	1.66917	0.196381	0.560565	ychF	MSMEG_5222
1.5252	6.93221	1.66775	0.196573	0.560565	MSMEG_1151	MSMEG_1151
-2.03569	4.81418	1.66773	0.196575	0.560565	MSMEG_2914	MSMEG_2914
4.01324	4.77292	1.66642	0.196751	0.56063	MSMEG_3488	MSMEG_3488
4.04409	4.87321	1.66553	0.19687	0.56063	MSMEG_0598	MSMEG_0598
4.0113	4.77181	1.66501	0.196941	0.56063	MSMEG_5173	MSMEG_5173
4.05345	4.91697	1.66221	0.197317	0.560862	MSMEG_5607	MSMEG_5607
2.15016	5.85087	1.65969	0.197657	0.560862	MSMEG_5284	MSMEG_5284
-2.57965	4.60263	1.65963	0.197666	0.560862	MSMEG_6503	MSMEG_6503
4.02541	4.85923	1.65962	0.197666	0.560862	MSMEG_5309	MSMEG_5309
-1.54018	6.03672	1.65948	0.197685	0.560862	MSMEG_1970	MSMEG_1970
4.08671	5.07585	1.65921	0.197722	0.560862	MSMEG_0501	MSMEG_0501
1.40381	6.77184	1.65842	0.197829	0.560862	MSMEG_3277	MSMEG_3277
4.00248	4.76857	1.65649	0.198089	0.560862	MSMEG_1168	MSMEG_1168
0.791514	9.09177	1.656	0.198156	0.560862	pyk	MSMEG_3227
4.00057	4.76746	1.65512	0.198276	0.560862	MSMEG_0718	MSMEG_0718
4.02384	4.84275	1.65508	0.198281	0.560862	MSMEG_6132	MSMEG_6132
2.1081	5.97692	1.65365	0.198475	0.561087	MSMEG_2799	MSMEG_2799
4.05937	4.97446	1.65098	0.198837	0.561568	MSMEG_0675	MSMEG_0675
4.06073	5.00892	1.65071	0.198874	0.561568	MSMEG_2193	MSMEG_2193
4.12669	5.5464	1.6459	0.199529	0.562771	MSMEG_0887	MSMEG_0887
-0.949538	8.13085	1.64532	0.19961	0.562771	MSMEG_1848	MSMEG_1848
4.0121	4.86533	1.64422	0.19976	0.562771	MSMEG_5509	MSMEG_5509
4.02147	4.87495	1.64294	0.199934	0.562771	MSMEG_3284	MSMEG_3284
3.98612	4.76089	1.64264	0.199975	0.562771	MSMEG_0012	MSMEG_0012
1.09741	7.82798	1.64254	0.199989	0.562771	uvrC	MSMEG_3078
4.03089	4.909	1.64121	0.200171	0.56296	MSMEG_4831	MSMEG_4831
1.75439	6.12649	1.63996	0.200343	0.563119	MSMEG_3214	MSMEG_3214
4.01268	4.86047	1.63798	0.200614	0.563353	MSMEG_4487	MSMEG_4487
4.05661	5.05386	1.63512	0.201009	0.563353	MSMEG_6771	MSMEG_6771
4.00178	4.83441	1.63477	0.201057	0.563353	MSMEG_4476	MSMEG_4476
1.33008	6.67809	1.63382	0.201188	0.563353	MSMEG_1195	MSMEG_1195
-2.49497	4.41744	1.63361	0.201216	0.563353	MSMEG_6211	MSMEG_6211
-2.49497	4.41744	1.63361	0.201216	0.563353	MSMEG_6506	MSMEG_6506
1.16892	7.21026	1.63123	0.201545	0.563353	MSMEG_3489	MSMEG_3489
4.00377	4.85742	1.62945	0.201791	0.563353	MSMEG_2204	MSMEG_2204
-0.916976	8.18198	1.62863	0.201904	0.563353	MSMEG_1919	MSMEG_1919
2.11772	5.90613	1.62763	0.202043	0.563353	MSMEG_2537	MSMEG_2537
4.09613	5.24461	1.62675	0.202165	0.563353	MSMEG_3782	MSMEG_3782
-0.988833	7.63668	1.62664	0.20218	0.563353	MSMEG_6755	MSMEG_6755
-1.76655	5.41099	1.62655	0.202193	0.563353	rbsK	MSMEG_4585
2.07194	6.0346	1.62607	0.20226	0.563353	MSMEG_6033	MSMEG_6033
4.00145	4.86775	1.62423	0.202516	0.563353	MSMEG_6499	MSMEG_6499
2.08504	5.99122	1.62351	0.202616	0.563353	MSMEG_1882	MSMEG_1882
-0.868272	8.42074	1.62237	0.202774	0.563353	hypA	MSMEG_2272
0.841847	8.92683	1.62225	0.20279	0.563353	MSMEG_0370	MSMEG_0370
3.96303	4.75103	1.6221	0.202812	0.563353	MSMEG_0982	MSMEG_0982
3.96125	4.74992	1.62087	0.202983	0.563353	MSMEG_6674	MSMEG_6674
-1.64973	5.78495	1.62075	0.202999	0.563353	MSMEG_4720	MSMEG_4720
-0.782344	8.77265	1.62027	0.203066	0.563353	MSMEG_2416	MSMEG_2416
-2.48032	4.42442	1.61814	0.203364	0.563353	MSMEG_1613	MSMEG_1613
4.05469	5.11829	1.61805	0.203376	0.563353	MSMEG_5990	MSMEG_5990
1.11014	7.7327	1.61726	0.203487	0.563353	rplI	MSMEG_6894
4.02875	4.99006	1.61646	0.203598	0.563353	MSMEG_4406	MSMEG_4406
-1.58377	6.02263	1.61571	0.203702	0.563353	MSMEG_2453	MSMEG_2453
4.00747	4.92124	1.61525	0.203768	0.563353	MSMEG_2550	MSMEG_2550
0.731116	9.25026	1.6148	0.203831	0.563353	MSMEG_4699	MSMEG_4699
3.98608	4.84991	1.61449	0.203873	0.563353	MSMEG_0436	MSMEG_0436
4.04053	5.04927	1.61312	0.204066	0.563372	MSMEG_5178	MSMEG_5178
1.69821	6.2337	1.6128	0.20411	0.563372	MSMEG_2581	MSMEG_2581
-2.47905	4.44901	1.6107	0.204405	0.56355	MSMEG_5994	MSMEG_5994
3.94894	4.74442	1.6102	0.204475	0.56355	ybaK	MSMEG_1913
-1.49803	5.87361	1.60988	0.20452	0.56355	MSMEG_0713	MSMEG_0713
1.4397	6.55774	1.60907	0.204635	0.56355	MSMEG_6512	MSMEG_6512
0.611773	11.3671	1.60743	0.204865	0.563856	MSMEG_4327	MSMEG_4327
0.617494	10.7301	1.60608	0.205056	0.563856	MSMEG_2078	MSMEG_2078
2.1036	5.90024	1.60583	0.205091	0.563856	MSMEG_0986	MSMEG_0986
2.05667	6.04606	1.60435	0.2053	0.563859	MSMEG_6913	MSMEG_6913
4.05275	5.10266	1.60372	0.205388	0.563859	MSMEG_0780	MSMEG_0780
3.99843	4.92983	1.60338	0.205437	0.563859	gcl	MSMEG_5476
4.04022	5.12591	1.60242	0.205573	0.563916	MSMEG_5922	MSMEG_5922
-1.85995	5.22426	1.60012	0.205899	0.564494	MSMEG_6607	MSMEG_6607
-1.68279	5.5429	1.59671	0.206382	0.564822	MSMEG_1502	MSMEG_1502
3.98486	4.91323	1.59473	0.206663	0.564822	MSMEG_1504	MSMEG_1504
-2.46371	4.45723	1.5944	0.206711	0.564822	MSMEG_6680	MSMEG_6680
2.10093	5.88757	1.59384	0.206791	0.564822	MSMEG_1942	MSMEG_1942
-2.47574	4.51165	1.59153	0.20712	0.564822	MSMEG_2210	MSMEG_2210
-2.47574	4.51165	1.59153	0.20712	0.564822	MSMEG_6498	MSMEG_6498
-1.01333	7.13823	1.5912	0.207166	0.564822	MSMEG_5400	MSMEG_5400
1.69639	6.21177	1.5904	0.20728	0.564822	MSMEG_3437	MSMEG_3437
-0.96069	7.86885	1.59003	0.207335	0.564822	trx	MSMEG_3138
1.35432	6.91722	1.58988	0.207356	0.564822	MSMEG_5893	MSMEG_5893
3.97175	4.88637	1.58956	0.207402	0.564822	MSMEG_3633	MSMEG_3633
3.93962	4.75112	1.58876	0.207516	0.564822	MSMEG_3694	MSMEG_3694
3.93962	4.75112	1.58876	0.207516	0.564822	MSMEG_4944	MSMEG_4944
3.94758	4.81209	1.58773	0.207663	0.564908	MSMEG_2539	MSMEG_2539
-1.61124	5.64118	1.58506	0.208045	0.565422	MSMEG_6781	MSMEG_6781
4.02912	5.12729	1.58414	0.208177	0.565422	MSMEG_0541	MSMEG_0541
0.604864	10.9197	1.58289	0.208357	0.565422	rplB	MSMEG_1439
2.08877	5.90977	1.58284	0.208364	0.565422	MSMEG_1433	MSMEG_1433
3.99256	4.98844	1.58232	0.208438	0.565422	MSMEG_0734	MSMEG_0734
3.96656	4.9059	1.57942	0.208856	0.565422	MSMEG_1455	MSMEG_1455
3.92629	4.74555	1.57719	0.209177	0.565422	MSMEG_4858	MSMEG_4858
-1.03364	7.09208	1.57655	0.20927	0.565422	MSMEG_2142	MSMEG_2142
3.95432	4.8446	1.57575	0.209386	0.565422	MSMEG_2018	MSMEG_2018
1.46443	6.43859	1.57496	0.209501	0.565422	MSMEG_3021	MSMEG_3021
3.94199	4.84314	1.57349	0.209712	0.565422	MSMEG_0218	MSMEG_0218
-1.93357	4.73044	1.57251	0.209855	0.565422	MSMEG_2669	MSMEG_2669
-1.87147	5.66495	1.57173	0.209968	0.565422	MSMEG_6447	MSMEG_6447
2.08965	5.8767	1.57124	0.210038	0.565422	pyc	MSMEG_6648
-1.05963	6.95897	1.57049	0.210147	0.565422	MSMEG_1777	MSMEG_1777
3.95811	4.88786	1.56694	0.210664	0.565422	MSMEG_4992	MSMEG_4992
-2.47121	4.59433	1.56593	0.210812	0.565422	MSMEG_4814	MSMEG_4814
3.94268	4.87499	1.56476	0.210981	0.565422	MSMEG_5714	MSMEG_5714
3.91121	4.73885	1.56455	0.211013	0.565422	MSMEG_3468	MSMEG_3468
1.02432	8.17021	1.56318	0.211212	0.565422	MSMEG_3631	MSMEG_3631
3.94285	4.85188	1.56221	0.211354	0.565422	MSMEG_5479	MSMEG_5479
-1.04946	7.02566	1.56151	0.211456	0.565422	trx	MSMEG_6934
2.06012	5.94112	1.56137	0.211476	0.565422	MSMEG_0263	MSMEG_0263
1.67409	6.22381	1.56114	0.21151	0.565422	MSMEG_1739	MSMEG_1739
1.18452	7.21612	1.5601	0.211663	0.565422	MSMEG_1783	MSMEG_1783
1.22067	7.9967	1.55833	0.211922	0.565422	MSMEG_6210	MSMEG_6210
4.02283	5.19132	1.55803	0.211966	0.565422	MSMEG_0209	MSMEG_0209
-1.76751	5.03832	1.55785	0.211993	0.565422	MSMEG_1501	MSMEG_1501
-0.877083	8.31173	1.55681	0.212145	0.565422	MSMEG_5733	MSMEG_5733
2.03836	6.0054	1.55557	0.212326	0.565422	MSMEG_2350	MSMEG_2350
2.05964	5.93644	1.55495	0.212419	0.565422	MSMEG_6276	MSMEG_6276
3.89988	4.73439	1.55454	0.212478	0.565422	MSMEG_2128	MSMEG_2128
3.94375	4.88268	1.55446	0.21249	0.565422	MSMEG_4197	MSMEG_4197
-1.58956	5.53438	1.55419	0.212529	0.565422	MSMEG_5888	MSMEG_5888
1.11087	7.61414	1.55397	0.212562	0.565422	MSMEG_1352	MSMEG_1352
1.111	7.48081	1.55367	0.212607	0.565422	MSMEG_5485	MSMEG_5485
3.89809	4.73326	1.55335	0.212654	0.565422	MSMEG_2857	MSMEG_2857
-2.45341	4.58084	1.55309	0.212692	0.565422	MSMEG_2157	MSMEG_2157
-1.07669	6.76409	1.55246	0.212784	0.565422	MSMEG_3290	MSMEG_3290
1.07008	7.64714	1.55213	0.212834	0.565422	MSMEG_6116	MSMEG_6116
4.00796	5.19428	1.55207	0.212842	0.565422	MSMEG_1555	MSMEG_1555
0.966306	8.25398	1.55052	0.213071	0.565422	MSMEG_3655	MSMEG_3655
0.840589	8.88475	1.54771	0.213485	0.565422	MSMEG_6219	MSMEG_6219
3.97924	5.08678	1.54601	0.213738	0.565422	MSMEG_3261	MSMEG_3261
-1.94661	4.80162	1.54557	0.213803	0.565422	MSMEG_5349	MSMEG_5349
3.92606	4.89045	1.54472	0.213928	0.565422	MSMEG_0619	MSMEG_0619
3.91003	4.80523	1.5442	0.214006	0.565422	MSMEG_6014	MSMEG_6014
4.02612	5.50209	1.54386	0.214056	0.565422	MSMEG_3307	MSMEG_3307
1.10726	7.54891	1.54385	0.214058	0.565422	MSMEG_5196	MSMEG_5196
3.97908	5.09679	1.54372	0.214077	0.565422	MSMEG_2188	MSMEG_2188
3.88506	4.72766	1.54232	0.214285	0.565422	MSMEG_3020	MSMEG_3020
1.31377	7.24168	1.5423	0.214288	0.565422	MSMEG_4168	MSMEG_4168
0.953827	8.37309	1.54226	0.214294	0.565422	MSMEG_0068	MSMEG_0068
3.88333	4.72654	1.54118	0.214454	0.565422	MSMEG_2814	MSMEG_2814
3.88333	4.72654	1.54118	0.214454	0.565422	MSMEG_3759	MSMEG_3759
4.01406	5.31221	1.54094	0.214489	0.565422	MSMEG_2451	MSMEG_2451
3.914	4.86356	1.54069	0.214528	0.565422	MSMEG_1155	MSMEG_1155
3.90309	4.82707	1.54059	0.214542	0.565422	MSMEG_6002	MSMEG_6002
3.99894	5.22532	1.53817	0.214902	0.566066	MSMEG_5542	MSMEG_5542
-2.44844	4.63824	1.53376	0.21556	0.566529	MSMEG_2005	MSMEG_2005
3.89638	4.79983	1.5326	0.215735	0.566529	MSMEG_0257	MSMEG_0257
-1.29539	6.14748	1.53256	0.21574	0.566529	MSMEG_6728	MSMEG_6728
3.87214	4.72205	1.53144	0.215908	0.566529	MSMEG_1430	MSMEG_1430
3.87044	4.72093	1.53035	0.216071	0.566529	MSMEG_1944	MSMEG_1944
3.87044	4.72093	1.53035	0.216071	0.566529	aroQ	MSMEG_2532
3.99553	5.26421	1.52982	0.216151	0.566529	MSMEG_2989	MSMEG_2989
1.64695	6.25603	1.5298	0.216155	0.566529	MSMEG_5065	MSMEG_5065
3.90061	4.82419	1.5293	0.216229	0.566529	MSMEG_3798	MSMEG_3798
3.86876	4.71981	1.52927	0.216233	0.566529	MSMEG_2991	MSMEG_2991
-0.83056	8.50818	1.52669	0.216622	0.567244	MSMEG_0558	MSMEG_0558
3.98866	5.20246	1.5246	0.216937	0.567504	MSMEG_4730	MSMEG_4730
-0.793485	8.58317	1.52449	0.216953	0.567504	efp	MSMEG_3035
1.05875	7.70627	1.51995	0.217639	0.568792	MSMEG_2770	MSMEG_2770
3.85766	4.71531	1.5197	0.217677	0.568792	MSMEG_1536	MSMEG_1536
3.85602	4.71419	1.51866	0.217834	0.56886	MSMEG_0086	MSMEG_0086
3.92596	4.95917	1.51799	0.217935	0.56886	MSMEG_5730	MSMEG_5730
3.92091	4.99569	1.51274	0.218734	0.570032	MSMEG_1964	MSMEG_1964
1.24806	6.84649	1.51225	0.218808	0.570032	MSMEG_0838	MSMEG_0838
3.89961	4.84448	1.51215	0.218823	0.570032	MSMEG_3347	MSMEG_3347
3.88257	4.828	1.51159	0.218908	0.570032	MSMEG_3606	MSMEG_3606
3.92913	4.9983	1.51121	0.218966	0.570032	MSMEG_0186	MSMEG_0186
3.86739	4.78788	1.50858	0.219368	0.570472	MSMEG_4717	MSMEG_4717
-1.57081	5.49976	1.50816	0.219432	0.570472	MSMEG_0460	MSMEG_0460
-1.9099	4.79595	1.50782	0.219484	0.570472	MSMEG_5985	MSMEG_5985
-0.691467	9.14671	1.50583	0.219788	0.570707	MSMEG_1771	MSMEG_1771
0.787071	8.82606	1.50571	0.219807	0.570707	rho	MSMEG_4954
1.60409	6.33111	1.5041	0.220053	0.571044	MSMEG_4558	MSMEG_4558
1.96344	6.1257	1.50178	0.22041	0.571618	MSMEG_0095	MSMEG_0095
3.86498	4.80886	1.50074	0.22057	0.571618	MSMEG_4370	MSMEG_4370
3.87799	4.85739	1.49983	0.22071	0.571618	MSMEG_6254	MSMEG_6254
-1.01723	7.34854	1.4993	0.22079	0.571618	MSMEG_6145	MSMEG_6145
3.90641	4.92045	1.49887	0.220858	0.571618	MSMEG_5736	MSMEG_5736
3.8822	4.88155	1.49691	0.221159	0.57202	MSMEG_0856	MSMEG_0856
3.87012	4.85215	1.49634	0.221246	0.57202	MSMEG_5665	MSMEG_5665
1.93519	6.18591	1.49498	0.221458	0.572264	MSMEG_0683	MSMEG_0683
3.86832	4.85435	1.49114	0.222051	0.573057	MSMEG_6362	MSMEG_6362
1.22112	6.99386	1.49081	0.222103	0.573057	MSMEG_5693	MSMEG_5693
3.93364	5.11171	1.49073	0.222115	0.573057	MSMEG_5577	MSMEG_5577
3.86619	4.82077	1.48721	0.222662	0.574139	MSMEG_2981	MSMEG_2981
1.33657	6.74281	1.48652	0.222769	0.574139	MSMEG_4324	MSMEG_4324
1.35582	6.64304	1.48577	0.222886	0.57414	MSMEG_1632	MSMEG_1632
1.15419	7.14942	1.4838	0.223193	0.57435	MSMEG_5264	MSMEG_5264
3.89652	4.99456	1.48227	0.223431	0.57435	MSMEG_0319	MSMEG_0319
3.95712	5.62974	1.48221	0.22344	0.57435	aroK	MSMEG_0453
3.8939	4.98636	1.48203	0.223468	0.57435	hisF	MSMEG_3211
3.94544	5.29935	1.48077	0.223666	0.57435	MSMEG_6571	MSMEG_6571
3.87001	4.89956	1.48074	0.223671	0.57435	MSMEG_5759	MSMEG_5759
1.61699	6.27321	1.4785	0.224021	0.574949	atpE	MSMEG_4941
-0.940662	7.49513	1.47578	0.224448	0.575742	MSMEG_5187	MSMEG_5187
0.959226	8.11036	1.47417	0.224701	0.576091	MSMEG_2963	MSMEG_2963
3.91211	5.10583	1.4729	0.2249	0.576299	MSMEG_5025	MSMEG_5025
1.07953	7.49875	1.47019	0.225328	0.577093	MSMEG_4024	MSMEG_4024
3.84045	4.84382	1.46817	0.225646	0.577349	MSMEG_2148	MSMEG_2148
-1.88568	4.78554	1.46742	0.225764	0.577349	MSMEG_3855	MSMEG_3855
3.89654	5.06677	1.46661	0.225893	0.577349	MSMEG_5340	MSMEG_5340
3.81444	4.76606	1.46514	0.226126	0.577349	MSMEG_1321	MSMEG_1321
3.81444	4.76606	1.46514	0.226126	0.577349	MSMEG_2582	MSMEG_2582
1.01424	8.10376	1.46462	0.226208	0.577349	MSMEG_6414	MSMEG_6414
3.83091	4.78514	1.46427	0.226263	0.577349	MSMEG_5019	MSMEG_5019
-0.560874	10.7062	1.4636	0.22637	0.577349	mmsA	MSMEG_2449
0.585427	11.0503	1.46266	0.226519	0.577428	rpsB	MSMEG_2519
3.86414	4.97655	1.45729	0.227374	0.579306	MSMEG_6496	MSMEG_6496
3.79913	4.70467	1.45626	0.227537	0.579422	MSMEG_1411	MSMEG_1411
1.67181	6.09081	1.45451	0.227818	0.579803	MSMEG_0889	MSMEG_0889
0.582614	11.6322	1.45385	0.227924	0.579803	rpoC	MSMEG_1368
3.83472	4.88567	1.45276	0.228098	0.579898	MSMEG_2506	MSMEG_2506
3.83684	4.85247	1.45214	0.228197	0.579898	MSMEG_0339	MSMEG_0339
1.22521	6.82521	1.44887	0.228721	0.580217	MSMEG_2044	MSMEG_2044
1.87787	6.28368	1.44769	0.228911	0.580217	MSMEG_1558	MSMEG_1558
3.88389	5.10637	1.44733	0.228969	0.580217	MSMEG_3924	MSMEG_3924
3.8544	4.94206	1.44667	0.229075	0.580217	MSMEG_1997	MSMEG_1997
3.79823	4.78156	1.44641	0.229117	0.580217	miaA	MSMEG_2734
3.79823	4.78156	1.44641	0.229117	0.580217	MSMEG_2984	MSMEG_2984
3.81542	4.80087	1.44619	0.229151	0.580217	MSMEG_2109	MSMEG_2109
-1.08401	6.84403	1.44348	0.229589	0.580522	MSMEG_3357	MSMEG_3357
3.78688	4.75397	1.44338	0.229604	0.580522	MSMEG_6497	MSMEG_6497
3.80892	4.83104	1.44324	0.229627	0.580522	MSMEG_6850	MSMEG_6850
3.80006	4.77298	1.43937	0.230253	0.58169	MSMEG_3534	MSMEG_3534
2.01863	5.80873	1.43892	0.230326	0.58169	MSMEG_2544	MSMEG_2544
3.84869	5.00059	1.4381	0.230459	0.581709	MSMEG_0926	MSMEG_0926
1.97294	5.97729	1.4374	0.230571	0.581709	MSMEG_0900	MSMEG_0900
-0.942323	7.26151	1.43571	0.230846	0.581755	MSMEG_2769	MSMEG_2769
1.09566	7.41965	1.43467	0.231015	0.581755	MSMEG_2753	MSMEG_2753
0.882729	8.37062	1.43459	0.231029	0.581755	MSMEG_0399	MSMEG_0399
3.80087	4.79535	1.43437	0.231064	0.581755	MSMEG_1770	MSMEG_1770
1.8339	6.37967	1.43331	0.231237	0.581891	MSMEG_1154	MSMEG_1154
3.76872	4.69092	1.4324	0.231385	0.581965	MSMEG_6199	MSMEG_6199
1.23571	6.72475	1.43007	0.231765	0.58262	MSMEG_5236	MSMEG_5236
1.97063	5.96714	1.42838	0.232041	0.583016	MSMEG_1634	MSMEG_1634
1.5352	6.41113	1.42276	0.232961	0.585028	MSMEG_5705	MSMEG_5705
3.83556	5.02632	1.4208	0.233283	0.585483	MSMEG_1417	MSMEG_1417
3.78245	4.78754	1.42021	0.233381	0.585483	MSMEG_6251	MSMEG_6251
3.81713	4.96554	1.41822	0.233708	0.585573	MSMEG_2815	MSMEG_2815
-1.33047	6.15492	1.418	0.233744	0.585573	MSMEG_4066	MSMEG_4066
0.86106	8.4939	1.41781	0.233775	0.585573	zwf	MSMEG_3101
3.79359	4.89052	1.41461	0.234304	0.586597	MSMEG_3108	MSMEG_3108
3.82182	4.96464	1.41278	0.234607	0.586782	MSMEG_0161	MSMEG_0161
3.78755	4.83423	1.41272	0.234617	0.586782	MSMEG_4616	MSMEG_4616
3.74219	4.6794	1.41136	0.234843	0.586908	MSMEG_1121	MSMEG_1121
-1.80086	4.67424	1.40938	0.235171	0.586908	MSMEG_4408	MSMEG_4408
3.80502	4.95678	1.40933	0.23518	0.586908	MSMEG_1420	MSMEG_1420
3.79033	4.85755	1.4093	0.235184	0.586908	MSMEG_3995	MSMEG_3995
-1.47393	5.54871	1.40881	0.235266	0.586908	MSMEG_4385	MSMEG_4385
1.13899	6.94665	1.40771	0.235449	0.587064	manB	MSMEG_1834
3.78588	4.8553	1.4064	0.235666	0.587117	MSMEG_2101	MSMEG_2101
1.5284	6.40484	1.4049	0.235917	0.587117	MSMEG_1511	MSMEG_1511
-1.70487	5.13518	1.40477	0.235939	0.587117	MSMEG_4001	MSMEG_4001
-1.82177	4.73122	1.40471	0.235949	0.587117	sthA	MSMEG_2748
3.75216	4.75296	1.40203	0.236395	0.587651	MSMEG_3805	MSMEG_3805
3.80867	4.96062	1.40183	0.236429	0.587651	MSMEG_4752	MSMEG_4752
3.72767	4.67248	1.40032	0.236682	0.587651	MSMEG_6106	MSMEG_6106
0.603653	9.94216	1.39988	0.236756	0.587651	rplS	MSMEG_2440
3.87098	5.6229	1.39983	0.236763	0.587651	MSMEG_6547	MSMEG_6547
1.01467	7.72027	1.39816	0.237043	0.588049	gltX	MSMEG_2383
3.77315	4.85107	1.39593	0.237417	0.58833	upp	MSMEG_1694
1.12202	7.11843	1.39574	0.23745	0.58833	MSMEG_5593	MSMEG_5593
0.888526	8.35064	1.39475	0.237616	0.58833	MSMEG_3399	MSMEG_3399
0.935887	8.2375	1.39463	0.237636	0.58833	MSMEG_5897	MSMEG_5897
0.940396	8.10793	1.39383	0.237771	0.588367	pgi	MSMEG_5541
3.78474	4.91813	1.3911	0.238231	0.589206	pcaC	MSMEG_2604
3.71339	4.66556	1.38956	0.238491	0.589289	MSMEG_5063	MSMEG_5063
3.79949	5.03286	1.38875	0.238627	0.589289	MSMEG_6449	MSMEG_6449
1.84604	6.27098	1.38865	0.238644	0.589289	MSMEG_0102	MSMEG_0102
-0.98857	7.24178	1.38806	0.238745	0.589289	MSMEG_4754	MSMEG_4754
3.73805	4.76973	1.38543	0.23919	0.589615	MSMEG_2377	MSMEG_2377
3.7715	4.89206	1.3852	0.239228	0.589615	MSMEG_0178	MSMEG_0178
1.86645	6.20118	1.38515	0.239238	0.589615	glnA	MSMEG_3561
1.00855	7.62792	1.3836	0.2395	0.589876	MSMEG_0834	MSMEG_0834
3.83067	5.16346	1.3831	0.239585	0.589876	MSMEG_3802	MSMEG_3802
2.01267	5.63882	1.38211	0.239753	0.589949	MSMEG_3481	MSMEG_3481
3.78819	4.97568	1.38137	0.239879	0.589949	MSMEG_3223	MSMEG_3223
-0.558935	12.4585	1.38047	0.240033	0.589949	MSMEG_0381	MSMEG_0381
3.70067	4.65976	1.37978	0.24015	0.589949	MSMEG_5315	MSMEG_5315
-1.24507	6.20907	1.37939	0.240216	0.589949	MSMEG_6280	MSMEG_6280
3.70384	4.67001	1.37465	0.241026	0.591054	MSMEG_3243	MSMEG_3243
1.07351	7.53401	1.37428	0.241089	0.591054	MSMEG_5238	MSMEG_5238
-0.979384	7.02353	1.37328	0.24126	0.591054	dxr	MSMEG_2578
[truncated: 2,903 more rows]

## Sheet: Table S2 FDL10_FDL15
logFC	logCPM	F	PValue	FDR	gene	locus_tag
5.29081	12.3723	89.6578	3.08e-21	1.51e-17	MSMEG_1244	MSMEG_1244
3.40827	10.9011	44.7649	2.27e-11	5.56e-08	MSMEG_1243	MSMEG_1243
-5.86867	7.8421	43.2549	4.9e-11	7.44e-08	MSMEG_3945	MSMEG_3945
-6.0916	7.00122	42.8362	6.07e-11	7.44e-08	MSMEG_6174	MSMEG_6174
3.0035	11.4976	39.7079	3e-10	2.62e-07	MSMEG_1246	MSMEG_1246
5.89296	8.27559	39.5802	3.2e-10	2.62e-07	MSMEG_1873	MSMEG_1873
6.50684	8.06825	38.1821	6.55e-10	4.58e-07	hemG	MSMEG_2781
2.96145	11.4338	37.8808	7.64e-10	4.68e-07	MSMEG_1245	MSMEG_1245
4.17728	8.64537	32.5186	1.19e-08	6.21e-06	hypE	MSMEG_2276
3.44446	9.02779	32.4051	1.27e-08	6.21e-06	MSMEG_0532	MSMEG_0532
4.75763	8.27451	31.516	2e-08	8.83e-06	MSMEG_1767	MSMEG_1767
-4.54484	7.88584	31.3649	2.16e-08	8.83e-06	MSMEG_3944	MSMEG_3944
-4.73612	7.83477	30.5097	3.36e-08	1.27e-05	MSMEG_3323	MSMEG_3323
-2.39538	12.8392	27.6395	1.47e-07	5.16e-05	MSMEG_0538	MSMEG_0538
-2.29157	11.3174	26.8575	2.21e-07	6.91e-05	MSMEG_0537	MSMEG_0537
-6.647	6.40713	26.8161	2.26e-07	6.91e-05	MSMEG_0586	MSMEG_0586
4.37657	7.92855	24.733	6.63e-07	0.000191157	MSMEG_0242	MSMEG_0242
-2.25371	9.82701	24.2989	8.3e-07	0.000226109	MSMEG_4121	MSMEG_4121
-3.42064	8.36094	23.4948	1.26e-06	0.000325133	MSMEG_3954	MSMEG_3954
5.28669	7.1804	23.0151	1.62e-06	0.00039627	fdhD	MSMEG_0165
-2.08845	10.3468	22.907	1.71e-06	0.000399204	MSMEG_3952	MSMEG_3952
-2.48174	9.08318	21.4302	3.69e-06	0.000821816	MSMEG_3951	MSMEG_3951
4.88373	8.25942	20.8596	4.97e-06	0.00105842	MSMEG_5550	MSMEG_5550
3.4976	8.1925	20.6659	5.49e-06	0.00112221	MSMEG_3079	MSMEG_3079
-3.21612	7.44509	20.2516	6.82e-06	0.00133744	MSMEG_4735	MSMEG_4735
4.1384	7.28619	19.8335	8.49e-06	0.00159997	MSMEG_0854	MSMEG_0854
3.5289	8.01054	19.6973	9.11e-06	0.00165441	MSMEG_4492	MSMEG_4492
5.01075	6.86721	19.4921	1.01e-05	0.00177611	MSMEG_0331	MSMEG_0331
3.90638	7.57955	19.3617	1.09e-05	0.00183587	MSMEG_3811	MSMEG_3811
-3.14353	7.88699	18.7767	1.48e-05	0.00241071	MSMEG_3934	MSMEG_3934
-1.90686	10.2521	18.5881	1.63e-05	0.00251992	MSMEG_3325	MSMEG_3325
-6.46331	5.63458	18.569	1.64e-05	0.00251992	MSMEG_5663	MSMEG_5663
-2.90525	8.23214	17.9256	2.31e-05	0.00342465	MSMEG_3948	MSMEG_3948
-1.87723	9.85602	17.8324	2.42e-05	0.00349074	MSMEG_1513	MSMEG_1513
1.87848	10.0112	17.5524	2.8e-05	0.00387537	MSMEG_5435	MSMEG_5435
-2.91708	8.03963	17.5246	2.85e-05	0.00387537	MSMEG_3946	MSMEG_3946
-4.87663	5.99416	16.7115	4.37e-05	0.00578362	MSMEG_5972	MSMEG_5972
-2.78811	8.03447	16.1387	5.9e-05	0.00761654	MSMEG_3943	MSMEG_3943
1.81138	9.98302	15.9654	6.47e-05	0.00813214	maf	MSMEG_1811
-3.07125	6.83473	15.5513	8.05e-05	0.00986782	MSMEG_4615	MSMEG_4615
-5.8591	5.57865	15.4343	8.57e-05	0.0102413	MSMEG_3953	MSMEG_3953
-2.81975	7.53468	15.3835	8.8e-05	0.0102698	MSMEG_1205	MSMEG_1205
-3.06268	7.7936	15.269	9.35e-05	0.0106573	MSMEG_3926	MSMEG_3926
1.7076	10.3259	15.1935	9.73e-05	0.0108393	rplC	MSMEG_1436
-1.90807	9.38839	14.9893	0.000108401	0.0118084	MSMEG_3942	MSMEG_3942
3.14907	7.67178	14.8672	0.000115643	0.0123235	MSMEG_6726	MSMEG_6726
2.60211	8.41809	14.7948	0.000120167	0.0125331	MSMEG_5223	MSMEG_5223
2.23237	8.83739	14.0688	0.000176652	0.0180406	MSMEG_6636	MSMEG_6636
3.55543	6.95783	13.9899	0.000184214	0.0184289	MSMEG_3056	MSMEG_3056
2.47427	8.4127	13.6673	0.000218693	0.0214406	MSMEG_5685	MSMEG_5685
-3.11255	6.92223	13.4798	0.000241655	0.0232273	MSMEG_3928	MSMEG_3928
-1.5601	10.305	13.3015	0.000265746	0.0250517	MSMEG_1683	MSMEG_1683
6.63405	6.19735	13.2601	0.000271669	0.0251268	MSMEG_2608	MSMEG_2608
3.25349	7.07053	13.1377	0.000289993	0.0263249	rpmA	MSMEG_4624
3.24187	7.19451	13.0748	0.000299895	0.0267288	MSMEG_6319	MSMEG_6319
-2.87672	6.90716	12.9096	0.000327536	0.0286711	MSMEG_3939	MSMEG_3939
-1.62509	13.6382	12.8472	0.000338641	0.0291232	MSMEG_6467	MSMEG_6467
6.51681	6.19272	12.619	0.000382567	0.0321061	MSMEG_1795	MSMEG_1795
-2.21601	8.50716	12.6002	0.000386425	0.0321061	cydB	MSMEG_3232
3.34424	6.98728	12.4048	0.000429013	0.0350504	MSMEG_0760	MSMEG_0760
1.69602	9.48349	12.315	0.000450135	0.0357143	MSMEG_2619	MSMEG_2619
1.67369	9.59252	12.3085	0.000451711	0.0357143	MSMEG_4939	MSMEG_4939
1.49254	10.5993	12.0374	0.000522334	0.0406426	sdhA	MSMEG_1670
1.48707	10.6521	11.958	0.000545069	0.0417489	MSMEG_1601	MSMEG_1601
-1.6391	9.46258	11.896	0.000563499	0.0424965	MSMEG_1786	MSMEG_1786
-4.03958	5.8745	11.698	0.000626698	0.0464657	MSMEG_1973	MSMEG_1973
2.01166	8.97567	11.6732	0.000635088	0.0464657	MSMEG_1802	MSMEG_1802
1.72669	9.28611	11.4973	0.00069806	0.0503219	MSMEG_6892	MSMEG_6892
-2.78878	6.53134	11.4576	0.000713143	0.0506641	MSMEG_1299	MSMEG_1299
-5.301	5.20134	11.2507	0.000797135	0.0558222	MSMEG_4204	MSMEG_4204
1.89491	8.85694	11.1766	0.000829612	0.0559413	MSMEG_1392	MSMEG_1392
-2.95625	6.59461	11.1573	0.00083826	0.0559413	MSMEG_3931	MSMEG_3931
2.80628	7.10561	11.1499	0.000841596	0.0559413	MSMEG_6562	MSMEG_6562
-1.56797	9.54744	11.1338	0.000848926	0.0559413	MSMEG_1131	MSMEG_1131
3.25666	6.75641	11.1187	0.000855896	0.0559413	MSMEG_5696	MSMEG_5696
2.91539	6.96154	11.0448	0.00089066	0.0574476	MSMEG_5005	MSMEG_5005
-4.71587	4.65685	10.6851	0.00108153	0.0688527	MSMEG_3052	MSMEG_3052
3.2326	6.69163	10.6072	0.00112802	0.0692665	MSMEG_1565	MSMEG_1565
-1.403	10.44	10.6057	0.00112895	0.0692665	MSMEG_1112	MSMEG_1112
-4.20807	5.5552	10.6033	0.00113042	0.0692665	MSMEG_3947	MSMEG_3947
-1.9049	8.63733	10.5716	0.00114991	0.0695531	MSMEG_4900	MSMEG_4900
-2.25193	7.50965	10.55	0.00116347	0.0695531	MSMEG_5576	MSMEG_5576
-1.48099	9.68327	10.5071	0.00119076	0.0703264	MSMEG_1681	MSMEG_1681
2.17374	8.41408	10.4571	0.00122342	0.0713956	aspS	MSMEG_3003
-4.09775	5.44612	10.4121	0.00125355	0.0719342	MSMEG_2029	MSMEG_2029
-3.43199	5.99133	10.3948	0.00126536	0.0719342	MSMEG_4135	MSMEG_4135
2.59804	7.09688	10.3619	0.00128813	0.0719342	MSMEG_0114	MSMEG_0114
-2.40161	6.80243	10.3572	0.00129135	0.0719342	MSMEG_4467	MSMEG_4467
2.33895	8.04037	10.291	0.0013385	0.0734984	pheT	MSMEG_3777
-1.89071	8.61746	10.276	0.00134942	0.0734984	ilvH	MSMEG_2373
2.38556	7.90545	10.1898	0.00141398	0.0758908	MSMEG_6024	MSMEG_6024
6.15011	6.03225	10.1764	0.00142431	0.0758908	MSMEG_2572	MSMEG_2572
6.23416	5.91603	10.1355	0.0014562	0.076756	MSMEG_4369	MSMEG_4369
5.14415	8.87934	10.0919	0.0014911	0.0770463	MSMEG_3615	MSMEG_3615
2.74591	7.09863	10.0874	0.0014947	0.0770463	dut	MSMEG_2765
-2.2621	7.74475	10.07	0.00150886	0.0770463	MSMEG_0351	MSMEG_0351
-2.07299	8.09298	10.0356	0.00153736	0.0776919	MSMEG_4582	MSMEG_4582
-1.67556	9.01001	9.98069	0.00158383	0.0780728	MSMEG_3233	MSMEG_3233
-1.33859	10.4884	9.97064	0.00159249	0.0780728	MSMEG_3332	MSMEG_3332
1.9084	8.69118	9.95402	0.00160693	0.0780728	MSMEG_0194	MSMEG_0194
-1.99112	8.27935	9.94423	0.00161549	0.0780728	MSMEG_2111	MSMEG_2111
2.071	8.36725	9.93396	0.00162453	0.0780728	MSMEG_0946	MSMEG_0946
-2.13984	7.9967	9.86909	0.00168278	0.0800874	MSMEG_6210	MSMEG_6210
-2.34039	6.73796	9.71171	0.00183309	0.0864022	MSMEG_5734	MSMEG_5734
2.21459	8.05369	9.64636	0.00189944	0.0886767	MSMEG_6189	MSMEG_6189
-3.75064	5.93878	9.58931	0.00195934	0.0906102	MSMEG_3929	MSMEG_3929
-2.29738	6.97917	9.56151	0.00198923	0.0911327	MSMEG_4078	MSMEG_4078
3.83863	6.58394	9.54085	0.00201174	0.0912012	MSMEG_0674	MSMEG_0674
2.71216	6.94265	9.52612	0.00202793	0.0912012	rnhA	MSMEG_5562
6.02892	5.96858	9.44246	0.00212252	0.094587	MSMEG_4049	MSMEG_4049
-4.00276	4.94153	9.3917	0.00218207	0.0963649	MSMEG_0419	MSMEG_0419
2.10472	8.2615	9.34245	0.00224147	0.0976837	MSMEG_6904	MSMEG_6904
1.67418	8.96661	9.33403	0.00225179	0.0976837	MSMEG_6760	MSMEG_6760
-2.32324	6.81225	9.28918	0.00230757	0.0984971	MSMEG_5410	MSMEG_5410
-2.19763	7.42331	9.28668	0.00231072	0.0984971	MSMEG_4500	MSMEG_4500
2.5394	7.00678	9.02848	0.00266074	0.11058	MSMEG_0108	MSMEG_0108
-4.17618	5.69518	9.01886	0.00267477	0.11058	MSMEG_0489	MSMEG_0489
-4.17866	5.60471	9.0146	0.00268101	0.11058	MSMEG_3385	MSMEG_3385
1.4139	9.59707	9.01119	0.00268601	0.11058	tig	MSMEG_4674
1.3416	9.90788	8.99697	0.00270698	0.11058	MSMEG_4902	MSMEG_4902
5.93905	5.9164	8.93621	0.0027985	0.113374	MSMEG_3910	MSMEG_3910
2.30604	7.59523	8.9047	0.00284718	0.114401	MSMEG_6903	MSMEG_6903
1.83349	8.57703	8.86043	0.00291704	0.116255	MSMEG_0530	MSMEG_0530
1.26269	11.1321	8.83165	0.00296338	0.117149	MSMEG_4757	MSMEG_4757
-4.40861	4.66771	8.80606	0.00300521	0.117852	MSMEG_1865	MSMEG_1865
2.36717	7.21534	8.73396	0.00312634	0.121629	MSMEG_1130	MSMEG_1130
3.94138	6.2472	8.7039	0.00317831	0.122678	MSMEG_0129	MSMEG_0129
2.6186	6.83412	8.67684	0.00322582	0.123539	MSMEG_0368	MSMEG_0368
5.95927	5.74032	8.65786	0.00325958	0.123864	MSMEG_4238	MSMEG_4238
2.37	7.08083	8.59245	0.00337871	0.127403	MSMEG_1279	MSMEG_1279
-1.27609	10.0264	8.57264	0.00341565	0.127813	MSMEG_6213	MSMEG_6213
2.34129	7.29947	8.54622	0.00346558	0.128699	MSMEG_3128	MSMEG_3128
2.26785	7.19211	8.523	0.00351005	0.129371	MSMEG_1395	MSMEG_1395
1.78425	8.60619	8.49633	0.00356185	0.130052	MSMEG_2937	MSMEG_2937
2.23401	7.61293	8.48627	0.00358159	0.130052	MSMEG_1812	MSMEG_1812
-1.45178	9.19425	8.47208	0.00360963	0.130106	MSMEG_5402	MSMEG_5402
2.44031	7.06014	8.35402	0.00385174	0.137819	MSMEG_5556	MSMEG_5556
2.46062	6.95579	8.34023	0.00388106	0.137862	MSMEG_1098	MSMEG_1098
-1.67887	8.64777	8.30847	0.0039495	0.138952	MSMEG_5732	MSMEG_5732
-1.95766	7.88443	8.29978	0.00396843	0.138952	MSMEG_0540	MSMEG_0540
-2.02202	7.51948	8.28026	0.00401131	0.139274	MSMEG_4898	MSMEG_4898
2.12694	7.79226	8.2698	0.00403446	0.139274	MSMEG_4239	MSMEG_4239
5.77983	5.87304	8.21775	0.00415179	0.142322	MSMEG_2459	MSMEG_2459
3.85831	6.21861	8.18751	0.00422156	0.143709	MSMEG_3215	MSMEG_3215
1.62766	8.83581	8.15973	0.00428668	0.144919	MSMEG_6459	MSMEG_6459
-4.24234	4.73653	8.1397	0.00433427	0.145524	MSMEG_4317	MSMEG_4317
2.70044	6.67455	8.09743	0.00443649	0.147563	MSMEG_2773	MSMEG_2773
2.27978	7.2891	8.0898	0.0044552	0.147563	MSMEG_5431	MSMEG_5431
-1.21058	10.3819	8.07273	0.00449733	0.147959	lepA	MSMEG_4556
-1.98673	7.13593	8.03756	0.00458547	0.149362	pruA	MSMEG_5119
-1.23284	9.98271	8.03147	0.00460092	0.149362	MSMEG_0409	MSMEG_0409
1.9504	8.17905	8.01834	0.00463438	0.149459	MSMEG_5079	MSMEG_5079
3.90419	6.11195	7.99178	0.00470283	0.150675	MSMEG_3512	MSMEG_3512
1.9916	8.03337	7.90563	0.00493203	0.156992	MSMEG_6899	MSMEG_6899
2.90224	6.52808	7.89016	0.00497438	0.157319	MSMEG_2529	MSMEG_2529
-3.33868	5.46886	7.74588	0.00538766	0.169297	MSMEG_6488	MSMEG_6488
-1.1867	11.6123	7.72606	0.0054471	0.169361	MSMEG_6253	MSMEG_6253
-1.27791	9.62858	7.69597	0.00553861	0.169361	MSMEG_0147	MSMEG_0147
-1.17324	11.2046	7.68002	0.00558775	0.169361	MSMEG_1682	MSMEG_1682
-3.40593	5.17076	7.65431	0.00566793	0.169361	MSMEG_1214	MSMEG_1214
5.70461	5.63882	7.6437	0.00570135	0.169361	MSMEG_3481	MSMEG_3481
-2.14575	6.99933	7.63994	0.00571323	0.169361	MSMEG_3940	MSMEG_3940
3.29557	6.24686	7.63837	0.00571822	0.169361	MSMEG_3162	MSMEG_3162
-4.20916	4.94368	7.63442	0.00573076	0.169361	MSMEG_6835	MSMEG_6835
3.15016	6.42702	7.63295	0.00573542	0.169361	mmsA	MSMEG_1498
-1.88222	8.00535	7.62834	0.0057501	0.169361	MSMEG_3935	MSMEG_3935
5.7001	5.59047	7.61358	0.00579734	0.169361	MSMEG_5201	MSMEG_5201
5.57312	5.92481	7.61041	0.00580753	0.169361	MSMEG_1546	MSMEG_1546
2.58159	6.77553	7.60071	0.00583885	0.169361	phoU	MSMEG_1605
1.39189	9.25026	7.58514	0.00588948	0.169825	MSMEG_4699	MSMEG_4699
2.68344	6.57169	7.55226	0.00599785	0.171939	phoP	MSMEG_5872
2.5938	6.70899	7.53599	0.00605224	0.172376	MSMEG_4963	MSMEG_4963
1.9115	8.07316	7.52672	0.00608346	0.172376	MSMEG_1883	MSMEG_1883
1.71133	8.51864	7.50917	0.006143	0.172987	MSMEG_0947	MSMEG_0947
-1.15825	11.4802	7.49964	0.00617559	0.172987	MSMEG_2081	MSMEG_2081
1.38881	9.17311	7.47744	0.00625217	0.174137	MSMEG_3225	MSMEG_3225
2.35605	6.84444	7.45794	0.00632025	0.175039	MSMEG_6906	MSMEG_6906
1.15971	11.2872	7.42409	0.0064402	0.175844	MSMEG_1813	MSMEG_1813
-1.95212	8.0044	7.41431	0.0064753	0.175844	MSMEG_3941	MSMEG_3941
-3.3868	5.31175	7.40654	0.0065033	0.175844	MSMEG_2177	MSMEG_2177
1.15297	10.6441	7.40213	0.00651927	0.175844	MSMEG_6761	MSMEG_6761
-1.16448	11.967	7.38413	0.00658481	0.175844	MSMEG_2093	MSMEG_2093
-1.88683	7.2065	7.37266	0.00662694	0.175844	MSMEG_6764	MSMEG_6764
-2.17548	6.71686	7.36402	0.00665885	0.175844	MSMEG_5271	MSMEG_5271
5.63254	5.542	7.36078	0.00667085	0.175844	MSMEG_6093	MSMEG_6093
2.41773	6.66603	7.35953	0.00667547	0.175844	MSMEG_0083	MSMEG_0083
3.14217	6.36998	7.35077	0.00670806	0.175844	MSMEG_0546	MSMEG_0546
1.96287	7.85366	7.32288	0.00681293	0.177644	MSMEG_2736	MSMEG_2736
2.60346	7.05697	7.31148	0.00685626	0.177827	MSMEG_6642	MSMEG_6642
3.69082	6.17141	7.29531	0.00691824	0.17818	alc	MSMEG_5727
1.14463	10.9508	7.283	0.00696577	0.17818	nusG	MSMEG_1345
5.60765	5.52839	7.27962	0.00697891	0.17818	MSMEG_6766	MSMEG_6766
3.78207	6.04191	7.24365	0.00712004	0.180842	MSMEG_4349	MSMEG_4349
-1.20256	9.74256	7.20355	0.00728082	0.183118	MSMEG_1951	MSMEG_1951
-3.60107	4.74063	7.19458	0.00731731	0.183118	MSMEG_4868	MSMEG_4868
1.99993	8.06154	7.18935	0.00733868	0.183118	MSMEG_1540	MSMEG_1540
5.5751	5.51312	7.18049	0.00737499	0.183118	MSMEG_1175	MSMEG_1175
-1.13508	11.385	7.17527	0.00739646	0.183118	MSMEG_4268	MSMEG_4268
5.53577	5.70491	7.13596	0.00756033	0.186235	MSMEG_4234	MSMEG_4234
1.9562	7.4871	7.11695	0.00764088	0.187278	MSMEG_5799	MSMEG_5799
3.68158	6.12649	7.10485	0.0076926	0.187608	MSMEG_3214	MSMEG_3214
5.54792	5.55431	7.06407	0.00786962	0.190238	MSMEG_4380	MSMEG_4380
-1.14362	10.0947	7.06215	0.00787807	0.190238	ppk	MSMEG_2391
5.54	5.47318	7.03752	0.0079871	0.191925	MSMEG_3762	MSMEG_3762
3.77184	5.98028	6.99844	0.0081633	0.195011	MSMEG_1187	MSMEG_1187
-1.15224	9.94783	6.99148	0.00819507	0.195011	MSMEG_4618	MSMEG_4618
2.05264	7.33371	6.97593	0.00826658	0.195762	MSMEG_5447	MSMEG_5447
5.50435	5.52826	6.95016	0.00838644	0.196918	MSMEG_4022	MSMEG_4022
5.48335	5.65105	6.94818	0.00839573	0.196918	MSMEG_4202	MSMEG_4202
-3.21457	5.10496	6.90713	0.00859063	0.20053	MSMEG_5575	MSMEG_5575
-1.61117	8.39962	6.8947	0.00865055	0.200971	MSMEG_5700	MSMEG_5700
5.47875	5.57166	6.87792	0.00873212	0.201297	MSMEG_0687	MSMEG_0687
1.1195	10.3671	6.87494	0.00874668	0.201297	ilvC	MSMEG_2374
2.16822	6.96461	6.8591	0.00882454	0.201777	ruvC	MSMEG_2943
3.67922	6.04381	6.84048	0.00891694	0.201777	MSMEG_6434	MSMEG_6434
5.45488	5.6206	6.83846	0.00892702	0.201777	MSMEG_4447	MSMEG_4447
3.73362	5.96751	6.83146	0.00896206	0.201777	MSMEG_3754	MSMEG_3754
-1.98804	6.76915	6.82921	0.00897337	0.201777	MSMEG_2249	MSMEG_2249
2.23552	6.86541	6.77973	0.00922546	0.206499	MSMEG_0914	MSMEG_0914
-1.27539	9.17376	6.75429	0.00935786	0.20851	MSMEG_5483	MSMEG_5483
1.94237	7.7406	6.7444	0.00940986	0.20872	MSMEG_5007	MSMEG_5007
2.06772	7.01286	6.72862	0.00949346	0.209626	MSMEG_4200	MSMEG_4200
3.63522	6.02879	6.64362	0.00995693	0.216787	MSMEG_4664	MSMEG_4664
3.11653	6.21177	6.64123	0.0099703	0.216787	MSMEG_3437	MSMEG_3437
5.39321	5.41013	6.63874	0.00998427	0.216787	MSMEG_1373	MSMEG_1373
1.12432	10.0537	6.63688	0.00999466	0.216787	MSMEG_6393	MSMEG_6393
-1.14741	9.89884	6.58026	0.0103175	0.222574	MSMEG_1774	MSMEG_1774
-1.80207	7.75034	6.57426	0.0103523	0.222574	MSMEG_3933	MSMEG_3933
1.90304	7.52321	6.51701	0.0106908	0.228848	MSMEG_0034	MSMEG_0034
5.35558	5.4411	6.4886	0.0108629	0.231522	MSMEG_2488	MSMEG_2488
2.01569	7.03986	6.43818	0.0111755	0.237152	MSMEG_2366	MSMEG_2366
5.32628	5.4536	6.42313	0.0112705	0.238138	MSMEG_3313	MSMEG_3313
2.24365	6.69751	6.39478	0.0114519	0.240931	MSMEG_5220	MSMEG_5220
5.32017	5.59964	6.38434	0.0115194	0.241316	MSMEG_3832	MSMEG_3832
1.11714	9.89578	6.32839	0.0118883	0.24761	MSMEG_6935	MSMEG_6935
5.29125	5.41504	6.32355	0.0119208	0.24761	aroE	MSMEG_3028
5.28042	5.41662	6.30749	0.0120292	0.248198	MSMEG_0782	MSMEG_0782
5.28813	5.53741	6.30354	0.0120561	0.248198	MSMEG_6072	MSMEG_6072
1.43564	8.76333	6.29694	0.0121011	0.248198	MSMEG_5661	MSMEG_5661
5.2635	5.33476	6.2866	0.0121719	0.24861	MSMEG_3677	MSMEG_3677
2.03659	6.94193	6.25491	0.0123914	0.252044	MSMEG_6614	MSMEG_6614
5.24685	5.40438	6.22683	0.0125894	0.254447	MSMEG_5529	MSMEG_5529
1.05694	10.7358	6.22347	0.0126133	0.254447	atpA	MSMEG_4938
2.06785	6.98496	6.18733	0.0128734	0.258629	MSMEG_1737	MSMEG_1737
5.20856	5.30995	6.15461	0.0131137	0.262079	MSMEG_5192	MSMEG_5192
-1.16207	9.42974	6.14742	0.0131671	0.262079	MSMEG_6283	MSMEG_6283
1.26757	9.22487	6.14226	0.0132055	0.262079	MSMEG_3197	MSMEG_3197
5.21826	5.64695	6.12236	0.013355	0.262085	MSMEG_1189	MSMEG_1189
-1.67261	7.62155	6.12181	0.0133592	0.262085	MSMEG_3004	MSMEG_3004
5.19389	5.30218	6.1181	0.0133872	0.262085	xylA	MSMEG_6021
-2.09601	6.41423	6.11381	0.0134197	0.262085	MSMEG_6823	MSMEG_6823
5.18813	5.29634	6.09969	0.0135273	0.263139	MSMEG_4793	MSMEG_4793
1.9465	7.21498	6.08865	0.0136121	0.26374	MSMEG_3767	MSMEG_3767
2.43294	6.5295	6.05958	0.0138379	0.26706	MSMEG_6017	MSMEG_6017
3.07397	6.08119	6.03156	0.0140592	0.270267	rpsO	MSMEG_2654
1.69782	8.05604	6.01792	0.0141682	0.271299	MSMEG_0973	MSMEG_0973
1.22117	9.2261	6.01069	0.0142264	0.271353	MSMEG_5589	MSMEG_5589
5.16725	5.35369	6.00122	0.014303	0.271756	folK	MSMEG_6101
5.1606	5.3499	5.98336	0.0144484	0.27346	MSMEG_3681	MSMEG_3681
1.04142	10.6935	5.96782	0.0145763	0.273702	MSMEG_4916	MSMEG_4916
-1.69488	7.68879	5.95698	0.0146661	0.273702	cysNC	MSMEG_4978
5.11818	5.27028	5.94704	0.0147491	0.273702	MSMEG_4253	MSMEG_4253
1.63061	8.24599	5.94252	0.0147869	0.273702	MSMEG_5080	MSMEG_5080
-3.37596	4.67501	5.94041	0.0148046	0.273702	MSMEG_0714	MSMEG_0714
-2.97462	5.138	5.93705	0.0148329	0.273702	MSMEG_5600	MSMEG_5600
-2.00787	6.45404	5.93478	0.014852	0.273702	MSMEG_3005	MSMEG_3005
2.87007	6.31517	5.9035	0.015118	0.276569	MSMEG_1387	MSMEG_1387
5.10895	5.25237	5.90321	0.0151205	0.276569	MSMEG_1213	MSMEG_1213
5.14583	5.58585	5.8898	0.015236	0.277646	MSMEG_5362	MSMEG_5362
-1.28484	8.97843	5.87514	0.0153633	0.278929	MSMEG_4141	MSMEG_4141
5.13174	5.39643	5.86568	0.0154461	0.279398	MSMEG_0902	MSMEG_0902
-1.51088	8.26887	5.85145	0.0155714	0.280629	MSMEG_3396	MSMEG_3396
1.85841	7.66141	5.82796	0.0157807	0.281112	hypD	MSMEG_2275
1.61289	8.23861	5.82766	0.0157834	0.281112	MSMEG_0932	MSMEG_0932
1.85463	7.28552	5.82263	0.0158285	0.281112	MSMEG_3863	MSMEG_3863
5.106	5.3315	5.81934	0.0158582	0.281112	MSMEG_2787	MSMEG_2787
1.20365	9.21043	5.81637	0.015885	0.281112	MSMEG_1342	MSMEG_1342
5.07598	5.30583	5.76929	0.016316	0.287476	MSMEG_3670	MSMEG_3670
1.86566	7.37936	5.76436	0.0163619	0.287476	MSMEG_6078	MSMEG_6078
1.66096	7.9434	5.73226	0.0166635	0.291731	MSMEG_5681	MSMEG_5681
5.0162	5.21706	5.7094	0.0168818	0.292587	MSMEG_0281	MSMEG_0281
5.04645	5.29611	5.7086	0.0168895	0.292587	MSMEG_6597	MSMEG_6597
2.94231	6.14565	5.7084	0.0168915	0.292587	MSMEG_4555	MSMEG_4555
2.92213	6.17058	5.69161	0.0170537	0.294357	MSMEG_0580	MSMEG_0580
5.06392	5.42997	5.67142	0.0172511	0.296419	MSMEG_1287	MSMEG_1287
4.99936	5.2064	5.66705	0.0172941	0.296419	MSMEG_3014	MSMEG_3014
2.33867	6.55964	5.6596	0.0173677	0.296451	catA	MSMEG_1911
5.00355	5.19812	5.65463	0.017417	0.296451	MSMEG_4564	MSMEG_4564
-3.24941	4.63792	5.63454	0.0176176	0.297798	MSMEG_2732	MSMEG_2732
-3.24941	4.63792	5.63454	0.0176176	0.297798	MSMEG_0774	MSMEG_0774
4.98378	5.18574	5.6032	0.0179354	0.302129	MSMEG_0518	MSMEG_0518
2.1572	6.57943	5.58953	0.0180759	0.303282	MSMEG_0222	MSMEG_0222
5.00443	5.26564	5.58446	0.0181283	0.303282	MSMEG_0500	MSMEG_0500
-1.83047	6.63797	5.57855	0.0181895	0.303282	MSMEG_0608	MSMEG_0608
1.70241	7.74051	5.56511	0.0183297	0.304583	MSMEG_0311	MSMEG_0311
1.68465	7.88822	5.55889	0.0183949	0.304634	MSMEG_0833	MSMEG_0833
5.00058	5.33508	5.53683	0.0186281	0.307292	MSMEG_5718	MSMEG_5718
1.21106	9.13533	5.52834	0.0187188	0.307292	atpG	MSMEG_4937
4.99118	5.33396	5.52341	0.0187715	0.307292	MSMEG_0579	MSMEG_0579
-3.2073	4.62558	5.51992	0.018809	0.307292	MSMEG_3693	MSMEG_3693
1.22658	9.07694	5.50952	0.0189211	0.307292	murA	MSMEG_4932
1.74593	7.19755	5.50856	0.0189315	0.307292	uppS	MSMEG_5256
4.93028	5.16561	5.49711	0.0190559	0.308291	MSMEG_0614	MSMEG_0614
-2.96233	5.21394	5.47847	0.0192601	0.310569	dapB	MSMEG_4350
4.96101	5.25982	5.4637	0.0194235	0.311438	MSMEG_6891	MSMEG_6891
-2.01752	6.40071	5.46212	0.019441	0.311438	MSMEG_5572	MSMEG_5572
4.92616	5.23798	5.42812	0.0198231	0.316523	MSMEG_6865	MSMEG_6865
4.92671	5.23315	5.41496	0.019973	0.317882	MSMEG_5855	MSMEG_5855
2.41263	6.3502	5.40368	0.0201025	0.318907	MSMEG_5434	MSMEG_5434
1.30005	8.83141	5.38058	0.0203703	0.32194	MSMEG_4940	MSMEG_4940
1.91136	6.88729	5.35964	0.0206163	0.32194	MSMEG_6452	MSMEG_6452
1.549	8.22199	5.35862	0.0206283	0.32194	MSMEG_5061	MSMEG_5061
1.98302	6.75192	5.35391	0.0206841	0.32194	MSMEG_3634	MSMEG_3634
4.86413	5.13379	5.35141	0.0207138	0.32194	MSMEG_0431	MSMEG_0431
4.86221	5.13248	5.34597	0.0207785	0.32194	MSMEG_0212	MSMEG_0212
4.89802	5.23657	5.33666	0.0208897	0.32194	MSMEG_3480	MSMEG_3480
4.85505	5.12915	5.33058	0.0209627	0.32194	ehuC	MSMEG_5369
-1.75975	6.75203	5.33001	0.0209696	0.32194	MSMEG_3567	MSMEG_3567
2.56875	6.2758	5.32701	0.0210057	0.32194	MSMEG_1702	MSMEG_1702
1.84088	7.07746	5.32615	0.0210161	0.32194	MSMEG_0867	MSMEG_0867
4.91042	5.28951	5.30618	0.0212582	0.323617	MSMEG_5339	MSMEG_5339
3.40895	5.80129	5.29338	0.021415	0.323617	MSMEG_0333	MSMEG_0333
4.8316	5.12201	5.29327	0.0214164	0.323617	MSMEG_0182	MSMEG_0182
1.03654	9.71343	5.28985	0.0214584	0.323617	atpD	MSMEG_4936
4.87779	5.22438	5.28146	0.0215621	0.323617	MSMEG_6628	MSMEG_6628
-3.10018	4.58931	5.2812	0.0215653	0.323617	MSMEG_5945	MSMEG_5945
4.86018	5.20673	5.27939	0.0215877	0.323617	MSMEG_3815	MSMEG_3815
2.51939	6.33294	5.27179	0.0216822	0.324043	ispF	MSMEG_6075
2.33933	6.41983	5.26311	0.0217905	0.324141	MSMEG_6599	MSMEG_6599
4.81526	5.112	5.25051	0.0219488	0.324141	MSMEG_6641	MSMEG_6641
1.39516	8.53972	5.24669	0.021997	0.324141	MSMEG_0688	MSMEG_0688
-1.60056	7.36076	5.24547	0.0220125	0.324141	MSMEG_0615	MSMEG_0615
-2.8256	5.08963	5.23479	0.0221479	0.324141	MSMEG_6264	MSMEG_6264
1.63743	7.60057	5.23237	0.0221788	0.324141	MSMEG_1382	MSMEG_1382
1.29069	8.82606	5.22945	0.022216	0.324141	rho	MSMEG_4954
1.46654	8.37062	5.22932	0.0222177	0.324141	MSMEG_0399	MSMEG_0399
4.80297	5.10419	5.21642	0.0223831	0.324706	MSMEG_6464	MSMEG_6464
1.52945	8.17582	5.21591	0.0223897	0.324706	MSMEG_5225	MSMEG_5225
-3.08035	4.59574	5.21082	0.0224552	0.324706	MSMEG_2155	MSMEG_2155
3.38635	5.78836	5.2011	0.0225812	0.325136	MSMEG_1123	MSMEG_1123
-2.08325	6.34216	5.1969	0.0226357	0.325136	MSMEG_3680	MSMEG_3680
2.18952	6.64304	5.19321	0.0226839	0.325136	MSMEG_1632	MSMEG_1632
-2.735	4.92261	5.18018	0.0228545	0.326626	MSMEG_2504	MSMEG_2504
4.81879	5.18147	5.16506	0.0230543	0.328524	MSMEG_0785	MSMEG_0785
3.34113	5.86063	5.15528	0.0231844	0.329128	MSMEG_0085	MSMEG_0085
-1.25185	8.7648	5.15046	0.0232489	0.329128	MSMEG_1604	MSMEG_1604
4.77522	5.08898	5.14678	0.0232981	0.329128	MSMEG_1597	MSMEG_1597
-1.53356	7.92988	5.13856	0.0234088	0.32922	MSMEG_5215	MSMEG_5215
2.16176	6.53105	5.13632	0.023439	0.32922	MSMEG_3119	MSMEG_3119
1.50562	8.18529	5.13018	0.023522	0.329442	cdsA	MSMEG_2543
1.68996	7.32334	5.12077	0.0236499	0.329716	lysA	MSMEG_4958
1.77068	7.09306	5.11885	0.0236761	0.329716	MSMEG_0815	MSMEG_0815
3.31128	5.8767	5.10265	0.0238981	0.331866	pyc	MSMEG_6648
1.24352	8.87162	5.09083	0.0240614	0.333189	MSMEG_5058	MSMEG_5058
4.78422	5.16433	5.08151	0.0241911	0.334042	MSMEG_5981	MSMEG_5981
1.74805	7.21026	5.06515	0.0244205	0.335082	MSMEG_3489	MSMEG_3489
-0.98413	9.84518	5.05609	0.0245483	0.335082	MSMEG_0406	MSMEG_0406
2.19664	6.43968	5.05556	0.0245559	0.335082	proC	MSMEG_0943
1.62914	7.65382	5.04782	0.0246658	0.335082	MSMEG_4923	MSMEG_4923
-2.85746	4.76722	5.04696	0.024678	0.335082	MSMEG_4575	MSMEG_4575
1.20937	8.96313	5.04675	0.024681	0.335082	MSMEG_5273	MSMEG_5273
4.83341	5.45835	5.04227	0.0247449	0.335082	MSMEG_1190	MSMEG_1190
1.55514	8.00937	5.03165	0.0248971	0.336213	MSMEG_2839	MSMEG_2839
1.66822	7.62494	5.02638	0.0249729	0.336311	MSMEG_0243	MSMEG_0243
3.35193	5.71792	5.00854	0.0252315	0.338842	MSMEG_5686	MSMEG_5686
4.69166	5.05499	4.99348	0.025452	0.338842	MSMEG_2380	MSMEG_2380
2.80153	6.09081	4.99186	0.0254758	0.338842	MSMEG_0889	MSMEG_0889
4.70288	5.05588	4.99075	0.0254921	0.338842	MSMEG_4517	MSMEG_4517
3.25653	5.93621	4.9853	0.0255725	0.338842	rimM	MSMEG_2437
4.73421	5.16176	4.97339	0.0257492	0.338842	MSMEG_3238	MSMEG_3238
4.71906	5.14164	4.97153	0.0257769	0.338842	MSMEG_5812	MSMEG_5812
-2.74534	5.18746	4.97127	0.0257808	0.338842	MSMEG_4014	MSMEG_4014
-2.84627	5.09372	4.95281	0.0260573	0.338842	eda	MSMEG_3788
1.60853	7.39985	4.95274	0.0260584	0.338842	MSMEG_0025	MSMEG_0025
-2.93506	5.40849	4.94974	0.0261037	0.338842	MSMEG_3981	MSMEG_3981
4.73148	5.13779	4.94699	0.0261453	0.338842	MSMEG_6645	MSMEG_6645
1.6511	7.27061	4.94481	0.0261782	0.338842	MSMEG_1708	MSMEG_1708
4.67886	5.04563	4.94348	0.0261983	0.338842	MSMEG_6322	MSMEG_6322
2.3204	6.33646	4.93628	0.0263077	0.338842	MSMEG_6821	MSMEG_6821
4.71036	5.13395	4.93192	0.0263741	0.338842	MSMEG_1766	MSMEG_1766
-2.69336	5.10238	4.92982	0.0264062	0.338842	MSMEG_5861	MSMEG_5861
4.74419	5.23622	4.92634	0.0264593	0.338842	MSMEG_4190	MSMEG_4190
4.65603	5.03933	4.92537	0.0264742	0.338842	hisI	MSMEG_3212
-2.43671	5.92343	4.9136	0.0266552	0.339829	MSMEG_5125	MSMEG_5125
1.51962	8.08952	4.91135	0.0266899	0.339829	MSMEG_4296	MSMEG_4296
1.98624	6.55237	4.89514	0.0269416	0.342144	MSMEG_3182	MSMEG_3182
1.83587	6.81796	4.88324	0.0271278	0.343619	MSMEG_3490	MSMEG_3490
-0.952079	12.4129	4.87517	0.027255	0.343896	MSMEG_4262	MSMEG_4262
4.651	5.03177	4.87295	0.02729	0.343896	MSMEG_4610	MSMEG_4610
-3.47425	4.47526	4.85654	0.0275509	0.346293	MSMEG_5762	MSMEG_5762
-1.41603	8.31717	4.84592	0.0277209	0.346376	hybA	MSMEG_2262
4.75883	5.54871	4.8413	0.0277952	0.346376	MSMEG_4385	MSMEG_4385
4.67584	5.11563	4.83544	0.0278899	0.346376	MSMEG_5390	MSMEG_5390
4.62255	5.0214	4.83361	0.0279194	0.346376	MSMEG_1763	MSMEG_1763
3.22534	5.8773	4.82414	0.0280731	0.346376	MSMEG_1208	MSMEG_1208
4.60858	5.01684	4.8222	0.0281047	0.346376	MSMEG_2896	MSMEG_2896
1.5073	7.97006	4.81657	0.0281967	0.346376	MSMEG_6272	MSMEG_6272
1.57568	7.903	4.81109	0.0282865	0.346376	MSMEG_0938	MSMEG_0938
-0.921474	11.0714	4.80876	0.0283247	0.346376	MSMEG_1773	MSMEG_1773
4.65447	5.12664	4.80317	0.0284167	0.346376	MSMEG_5846	MSMEG_5846
4.59811	5.0122	4.80226	0.0284318	0.346376	MSMEG_3817	MSMEG_3817
-3.66086	4.94169	4.80134	0.0284471	0.346376	MSMEG_0585	MSMEG_0585
2.26523	6.36496	4.79765	0.028508	0.346376	MSMEG_6635	MSMEG_6635
4.64131	5.10527	4.79531	0.0285467	0.346376	MSMEG_0884	MSMEG_0884
2.10464	6.4858	4.78923	0.0286476	0.346743	MSMEG_5639	MSMEG_5639
4.73168	5.46551	4.78083	0.0287877	0.347579	MSMEG_4799	MSMEG_4799
-1.51602	6.92717	4.75418	0.0292367	0.352134	MSMEG_2476	MSMEG_2476
1.16425	9.01613	4.72237	0.0297822	0.357824	MSMEG_4040	MSMEG_4040
2.78062	5.9954	4.71329	0.0299399	0.358839	MSMEG_0944	MSMEG_0944
-1.42787	8.07847	4.70808	0.0300307	0.35905	MSMEG_3400	MSMEG_3400
4.69977	5.49976	4.6902	0.0303447	0.3617	MSMEG_0460	MSMEG_0460
4.63207	5.18965	4.68708	0.0303999	0.3617	MSMEG_6277	MSMEG_6277
4.5491	4.9887	4.67818	0.0305578	0.36205	MSMEG_1332	MSMEG_1332
4.58704	5.08121	4.67582	0.0305998	0.36205	MSMEG_0686	MSMEG_0686
3.23407	5.7627	4.66929	0.0307162	0.36205	MSMEG_2072	MSMEG_2072
-2.93582	5.09303	4.66882	0.0307248	0.36205	MSMEG_3932	MSMEG_3932
4.5719	5.07624	4.662	0.030847	0.362618	MSMEG_1369	MSMEG_1369
4.60606	5.16184	4.63853	0.0312714	0.366442	MSMEG_3358	MSMEG_3358
0.950651	9.88777	4.63064	0.0314156	0.366442	MSMEG_0640	MSMEG_0640
-2.59694	5.31212	4.62534	0.0315128	0.366442	MSMEG_6035	MSMEG_6035
3.21103	5.80523	4.62217	0.0315711	0.366442	MSMEG_2019	MSMEG_2019
1.81924	6.81533	4.61846	0.0316394	0.366442	MSMEG_0053	MSMEG_0053
4.64255	5.29599	4.61708	0.0316648	0.366442	dapE	MSMEG_5103
1.54852	7.78779	4.60439	0.0319001	0.366442	trmB	MSMEG_0252
4.55679	5.08484	4.6019	0.0319464	0.366442	MSMEG_2131	MSMEG_2131
-1.53139	7.1707	4.59741	0.0320301	0.366442	MSMEG_4065	MSMEG_4065
1.50855	7.86386	4.59325	0.0321078	0.366442	MSMEG_4293	MSMEG_4293
1.7543	6.80698	4.5888	0.0321913	0.366442	MSMEG_6354	MSMEG_6354
4.50808	4.97065	4.58334	0.032294	0.366442	MSMEG_3278	MSMEG_3278
1.52347	7.84778	4.5827	0.032306	0.366442	MSMEG_3884	MSMEG_3884
4.53767	5.06084	4.5824	0.0323119	0.366442	MSMEG_5869	MSMEG_5869
0.89993	10.6561	4.58073	0.0323433	0.366442	MSMEG_1807	MSMEG_1807
-1.45647	7.22849	4.57476	0.0324562	0.366442	ectB	MSMEG_3900
-2.59561	5.41364	4.57236	0.0325017	0.366442	MSMEG_5216	MSMEG_5216
1.7135	6.97087	4.571	0.0325274	0.366442	MSMEG_1952	MSMEG_1952
-2.12335	6.21328	4.56757	0.0325925	0.366442	MSMEG_3391	MSMEG_3391
1.52783	7.78574	4.55583	0.0328167	0.368118	MSMEG_4219	MSMEG_4219
1.33204	8.43696	4.54965	0.0329355	0.368607	secE	MSMEG_1344
4.63983	5.54188	4.54431	0.0330382	0.368914	MSMEG_5473	MSMEG_5473
4.51301	5.0506	4.53648	0.0331898	0.369764	MSMEG_0130	MSMEG_0130
1.17205	8.91754	4.52286	0.0334549	0.37098	rpsJ	MSMEG_1435
-1.2301	8.59627	4.51767	0.0335565	0.37098	MSMEG_4734	MSMEG_4734
1.58567	7.3453	4.51571	0.0335948	0.37098	ureG	MSMEG_3623
3.21391	5.63545	4.51537	0.0336016	0.37098	MSMEG_3177	MSMEG_3177
1.6479	7.07564	4.51033	0.0337008	0.371239	MSMEG_1548	MSMEG_1548
1.17216	8.87195	4.49172	0.0340694	0.371907	MSMEG_4920	MSMEG_4920
1.23482	8.65955	4.48814	0.0341407	0.371907	lepB	MSMEG_2441
1.48549	7.84872	4.48667	0.0341702	0.371907	MSMEG_6387	MSMEG_6387
1.56495	7.34977	4.48593	0.0341849	0.371907	MSMEG_5261	MSMEG_5261
1.48827	7.85171	4.4858	0.0341876	0.371907	MSMEG_4142	MSMEG_4142
4.54996	5.17125	4.48435	0.0342167	0.371907	MSMEG_0480	MSMEG_0480
4.44318	4.9431	4.46402	0.034626	0.375524	MSMEG_2436	MSMEG_2436
2.48929	6.08153	4.4573	0.0347624	0.375957	MSMEG_3106	MSMEG_3106
1.62555	7.08768	4.45451	0.0348194	0.375957	MSMEG_4241	MSMEG_4241
-2.69274	4.81386	4.44777	0.034957	0.376614	prrA	MSMEG_5662
1.60877	7.3726	4.44184	0.0350786	0.377095	MSMEG_6363	MSMEG_6363
2.14632	6.43334	4.43214	0.0352784	0.378413	MSMEG_6184	MSMEG_6184
4.43104	4.93839	4.41852	0.035561	0.379817	MSMEG_3240	MSMEG_3240
4.41547	4.93115	4.41465	0.0356417	0.379817	MSMEG_1847	MSMEG_1847
4.46428	5.04591	4.41169	0.0357037	0.379817	MSMEG_0794	MSMEG_0794
4.42596	4.93623	4.41066	0.0357253	0.379817	MSMEG_2502	MSMEG_2502
4.42343	4.93516	4.40676	0.035807	0.379817	cdd	MSMEG_1673
4.44809	5.02321	4.40058	0.0359369	0.379817	MSMEG_2105	MSMEG_2105
3.14208	5.77824	4.39782	0.0359952	0.379817	MSMEG_4578	MSMEG_4578
-0.951233	9.74675	4.39579	0.0360379	0.379817	MSMEG_0536	MSMEG_0536
1.59868	7.06729	4.39254	0.0361067	0.379817	MSMEG_1945	MSMEG_1945
3.17549	5.60936	4.38243	0.0363215	0.381259	MSMEG_4216	MSMEG_4216
4.39509	4.92236	4.3768	0.0364416	0.381702	MSMEG_0898	MSMEG_0898
1.13889	8.91511	4.36924	0.0366036	0.382048	ksgA	MSMEG_5438
4.49029	5.13103	4.36799	0.0366305	0.382048	MSMEG_5045	MSMEG_5045
-1.03419	9.30329	4.35224	0.0369707	0.384425	MSMEG_0343	MSMEG_0343
1.70973	6.89742	4.35018	0.0370153	0.384425	MSMEG_0858	MSMEG_0858
1.34374	8.2799	4.34602	0.0371059	0.384552	MSMEG_0529	MSMEG_0529
-0.920896	9.7263	4.33851	0.0372699	0.385223	sufB	MSMEG_3122
1.52642	7.50723	4.33576	0.0373301	0.385223	pgm	MSMEG_2136
4.4633	5.10453	4.33229	0.0374064	0.385223	MSMEG_6347	MSMEG_6347
-1.85724	6.32716	4.32518	0.0375629	0.386023	MSMEG_5601	MSMEG_5601
4.37594	4.91524	4.3193	0.0376927	0.386029	MSMEG_1139	MSMEG_1139
-2.45955	5.71236	4.31502	0.0377878	0.386029	MSMEG_2672	MSMEG_2672
-2.83545	4.7734	4.31448	0.0377996	0.386029	MSMEG_5113	MSMEG_5113
2.40967	6.14454	4.30832	0.0379368	0.386624	MSMEG_0240	MSMEG_0240
-1.78677	6.39702	4.30288	0.0380583	0.387058	MSMEG_2434	MSMEG_2434
1.83684	6.59819	4.29205	0.0383013	0.388723	MSMEG_3676	MSMEG_3676
4.35686	4.907	4.28712	0.0384125	0.389046	MSMEG_2021	MSMEG_2021
2.24433	6.39822	4.28327	0.0384996	0.389124	MSMEG_1097	MSMEG_1097
1.64072	6.91503	4.27692	0.0386437	0.389777	MSMEG_1757	MSMEG_1757
4.33614	4.89648	4.27216	0.0387522	0.390068	MSMEG_4139	MSMEG_4139
1.83624	6.59997	4.26866	0.038832	0.390071	hemL	MSMEG_0969
2.22308	6.41141	4.2498	0.0392655	0.39361	MSMEG_4225	MSMEG_4225
4.45566	5.20859	4.24637	0.0393449	0.39361	MSMEG_5923	MSMEG_5923
1.52671	7.38255	4.23271	0.0396626	0.394712	lexA	MSMEG_2740
3.08163	5.7519	4.23183	0.0396832	0.394712	MSMEG_0743	MSMEG_0743
4.32625	4.89407	4.23047	0.039715	0.394712	MSMEG_2100	MSMEG_2100
4.38697	4.9993	4.22781	0.0397772	0.394712	MSMEG_1796	MSMEG_1796
1.57048	7.49266	4.219	0.0399842	0.394927	lppH	MSMEG_4597
2.68802	5.90024	4.21797	0.0400086	0.394927	MSMEG_0986	MSMEG_0986
1.1019	8.97097	4.21661	0.0400406	0.394927	dnaN	MSMEG_0001
-1.18055	8.63657	4.20622	0.0402866	0.396556	MSMEG_6212	MSMEG_6212
1.55665	7.39647	4.20238	0.0403779	0.396659	MSMEG_1635	MSMEG_1635
0.866292	11.5555	4.19868	0.0404661	0.39673	MSMEG_6392	MSMEG_6392
-1.72655	6.41033	4.19242	0.0406157	0.397008	MSMEG_3364	MSMEG_3364
1.52252	7.31422	4.19031	0.0406664	0.397008	map	MSMEG_2587
2.03458	6.40044	4.18408	0.040816	0.397008	MSMEG_5174	MSMEG_5174
1.05037	9.09818	4.18398	0.0408184	0.397008	MSMEG_5788	MSMEG_5788
4.29591	4.88072	4.17917	0.0409344	0.397347	MSMEG_0126	MSMEG_0126
-2.43022	5.66495	4.16967	0.0411645	0.398791	MSMEG_6447	MSMEG_6447
-1.83397	6.30322	4.16611	0.0412511	0.398842	MSMEG_4601	MSMEG_4601
3.01335	5.90908	4.16194	0.0413526	0.39901	MSMEG_5726	MSMEG_5726
4.28427	4.87565	4.15872	0.0414313	0.39901	MSMEG_2125	MSMEG_2125
4.33946	4.99565	4.15106	0.0416192	0.400034	MSMEG_4097	MSMEG_4097
4.27487	4.87165	4.14145	0.041856	0.400912	MSMEG_4829	MSMEG_4829
2.56854	6.09537	4.1405	0.0418796	0.400912	MSMEG_5707	MSMEG_5707
2.68546	5.84224	4.13742	0.0419559	0.400912	MSMEG_1528	MSMEG_1528
1.43593	7.93896	4.12669	0.0422225	0.402675	MSMEG_4301	MSMEG_4301
4.26108	4.86548	4.11831	0.0424322	0.40269	cobH	MSMEG_3872
2.56367	6.09097	4.11472	0.0425223	0.40269	MSMEG_3958	MSMEG_3958
1.70123	6.91212	4.11228	0.0425838	0.40269	MSMEG_5416	MSMEG_5416
-2.11351	6.02263	4.11132	0.0426078	0.40269	MSMEG_2453	MSMEG_2453
4.2716	4.87298	4.10965	0.04265	0.40269	MSMEG_6328	MSMEG_6328
4.26927	4.87189	4.10641	0.0427318	0.40269	MSMEG_6237	MSMEG_6237
4.31818	4.97259	4.10318	0.0428134	0.40269	MSMEG_4430	MSMEG_4430
-1.28053	8.29058	4.09569	0.0430035	0.40269	MSMEG_4110	MSMEG_4110
4.30557	4.98205	4.08968	0.0431566	0.40269	MSMEG_2251	MSMEG_2251
-2.40609	4.8101	4.08913	0.0431706	0.40269	MSMEG_0168	MSMEG_0168
4.30766	4.96825	4.08757	0.0432107	0.40269	MSMEG_3554	MSMEG_3554
1.32587	8.26786	4.08544	0.0432651	0.40269	prfB	MSMEG_2086
4.33747	5.05675	4.08376	0.0433081	0.40269	MSMEG_4588	MSMEG_4588
2.67073	5.83421	4.08118	0.0433742	0.40269	MSMEG_6828	MSMEG_6828
-2.52501	4.99229	4.07717	0.0434772	0.402884	MSMEG_1732	MSMEG_1732
2.06628	6.42918	4.06579	0.043771	0.404777	MSMEG_3708	MSMEG_3708
1.65578	6.77969	4.06234	0.0438606	0.404777	MSMEG_2528	MSMEG_2528
-0.861336	10.1073	4.05845	0.0439618	0.404777	MSMEG_3950	MSMEG_3950
1.46305	7.82505	4.04513	0.04431	0.404777	hypF	MSMEG_2273
1.37841	8.05113	4.04234	0.0443832	0.404777	MSMEG_5439	MSMEG_5439
1.66079	6.746	4.04168	0.0444005	0.404777	MSMEG_5414	MSMEG_5414
1.75038	6.59656	4.04123	0.0444124	0.404777	MSMEG_6453	MSMEG_6453
-1.38972	7.6232	4.03849	0.0444845	0.404777	MSMEG_3254	MSMEG_3254
4.22837	4.85426	4.03647	0.0445377	0.404777	hisE	MSMEG_4181
-2.29983	5.6229	4.03472	0.0445841	0.404777	MSMEG_6547	MSMEG_6547
1.42323	7.56088	4.03013	0.0447054	0.404777	MSMEG_1918	MSMEG_1918
4.26007	4.94749	4.02553	0.0448274	0.404777	MSMEG_2639	MSMEG_2639
-0.855552	12.035	4.02495	0.0448428	0.404777	MSMEG_1743	MSMEG_1743
4.30176	5.043	4.02268	0.0449034	0.404777	MSMEG_1251	MSMEG_1251
4.22075	4.85126	4.02148	0.0449351	0.404777	MSMEG_5301	MSMEG_5301
4.22171	4.85352	4.01632	0.0450728	0.404777	MSMEG_5115	MSMEG_5115
2.44402	6.22464	4.01586	0.0450853	0.404777	MSMEG_1317	MSMEG_1317
1.73817	6.71484	4.00866	0.0452782	0.405275	rnhB	MSMEG_2442
1.49441	7.37259	4.00358	0.0454148	0.405275	MSMEG_1662	MSMEG_1662
2.11043	6.32067	4.00353	0.0454161	0.405275	recC	MSMEG_1328
4.25986	4.9495	4.00148	0.0454715	0.405275	MSMEG_5787	MSMEG_5787
1.45821	7.50919	3.98732	0.045855	0.407019	MSMEG_4038	MSMEG_4038
1.38968	7.71652	3.98655	0.0458759	0.407019	MSMEG_5870	MSMEG_5870
1.42453	7.79327	3.98507	0.0459162	0.407019	MSMEG_0033	MSMEG_0033
3.01902	5.64737	3.97457	0.0462033	0.408824	MSMEG_0742	MSMEG_0742
3.0085	5.64905	3.95575	0.0467225	0.412673	MSMEG_3045	MSMEG_3045
-1.36444	7.8523	3.95009	0.04688	0.413157	MSMEG_6881	MSMEG_6881
1.12852	8.79216	3.94752	0.0469515	0.413157	MSMEG_0380	MSMEG_0380
4.2761	5.05096	3.93884	0.0471945	0.413157	MSMEG_1140	MSMEG_1140
4.17073	4.82937	3.93676	0.0472528	0.413157	MSMEG_5946	MSMEG_5946
3.0003	5.64767	3.93637	0.0472637	0.413157	MSMEG_6222	MSMEG_6222
-1.72579	6.39267	3.93429	0.0473222	0.413157	MSMEG_5748	MSMEG_5748
4.18476	4.83973	3.93158	0.0473984	0.413157	MSMEG_3874	MSMEG_3874
-1.37614	7.63225	3.92673	0.0475354	0.413157	MSMEG_0594	MSMEG_0594
1.37455	7.97674	3.92672	0.0475358	0.413157	greA	MSMEG_5263
1.44732	7.91406	3.91926	0.0477471	0.413681	metX	MSMEG_1651
-1.36019	7.74593	3.91589	0.047843	0.413681	MSMEG_1445	MSMEG_1445
4.17664	4.83667	3.91566	0.0478493	0.413681	MSMEG_5194	MSMEG_5194
4.21454	4.94725	3.90878	0.0480455	0.414491	MSMEG_5389	MSMEG_5389
-2.58773	4.69213	3.9054	0.0481425	0.414491	MSMEG_5998	MSMEG_5998
1.1637	8.69438	3.90306	0.0482094	0.414491	secF	MSMEG_2962
4.19996	4.92514	3.90056	0.0482812	0.414491	MSMEG_4023	MSMEG_4023
2.10107	6.267	3.89246	0.0485144	0.415765	MSMEG_1638	MSMEG_1638
-2.79559	4.53746	3.88922	0.0486082	0.415842	MSMEG_6884	MSMEG_6884
3.00275	5.51624	3.87608	0.0489901	0.418379	MSMEG_0551	MSMEG_0551
4.14926	4.82502	3.86959	0.0491799	0.418463	MSMEG_4970	MSMEG_4970
4.19189	4.93827	3.86901	0.0491967	0.418463	MSMEG_2949	MSMEG_2949
4.14705	4.8239	3.86674	0.0492633	0.418463	MSMEG_6799	MSMEG_6799
4.14493	4.82282	3.86408	0.0493414	0.418463	MSMEG_2998	MSMEG_2998
4.26512	5.15725	3.83524	0.0501971	0.424508	MSMEG_0705	MSMEG_0705
4.17839	4.92011	3.83423	0.0502274	0.424508	MSMEG_4906	MSMEG_4906
2.08247	6.28098	3.82366	0.0505451	0.426001	MSMEG_3881	MSMEG_3881
2.97125	5.67831	3.82023	0.0506486	0.426001	MSMEG_0919	MSMEG_0919
-0.825669	10.3736	3.8197	0.0506648	0.426001	MSMEG_5245	MSMEG_5245
2.97692	5.50177	3.80517	0.051106	0.427528	MSMEG_0700	MSMEG_0700
4.10981	4.80801	3.80386	0.0511459	0.427528	MSMEG_6718	MSMEG_6718
-2.74253	4.50636	3.80343	0.0511591	0.427528	MSMEG_1898	MSMEG_1898
4.10776	4.80691	3.80136	0.0512225	0.427528	MSMEG_5602	MSMEG_5602
-0.816596	11.1414	3.79906	0.0512927	0.427528	gap	MSMEG_3084
2.91144	5.84239	3.79047	0.0515567	0.427528	MSMEG_6777	MSMEG_6777
-1.99292	6.22379	3.78873	0.0516103	0.427528	MSMEG_0722	MSMEG_0722
1.89693	6.45947	3.78665	0.0516743	0.427528	pstS	MSMEG_5782
4.14981	4.90881	3.78608	0.0516919	0.427528	MSMEG_5186	MSMEG_5186
1.6558	6.7177	3.77942	0.0518982	0.427528	MSMEG_5401	MSMEG_5401
4.09346	4.80048	3.77847	0.0519277	0.427528	MSMEG_2179	MSMEG_2179
4.09346	4.80048	3.77847	0.0519277	0.427528	MSMEG_2700	MSMEG_2700
-0.839078	9.98149	3.77643	0.051991	0.427528	MSMEG_2401	MSMEG_2401
2.95064	5.61233	3.77397	0.0520673	0.427528	MSMEG_4484	MSMEG_4484
-2.34725	5.23677	3.76703	0.0522837	0.428586	MSMEG_6747	MSMEG_6747
-2.20523	5.62974	3.7462	0.0529391	0.433117	aroK	MSMEG_0453
2.95237	5.67452	3.74387	0.0530131	0.433117	MSMEG_2461	MSMEG_2461
2.27919	6.08566	3.7378	0.0532059	0.433969	MSMEG_5545	MSMEG_5545
2.90938	5.80337	3.72723	0.0535436	0.435998	MSMEG_1606	MSMEG_1606
1.46058	7.24327	3.71631	0.0538947	0.438129	MSMEG_3531	MSMEG_3531
2.9311	5.59376	3.70475	0.0542694	0.439033	MSMEG_6513	MSMEG_6513
1.48569	7.18686	3.70352	0.0543092	0.439033	MSMEG_4214	MSMEG_4214
1.56523	6.88542	3.70264	0.0543381	0.439033	MSMEG_6142	MSMEG_6142
-1.37703	7.31611	3.70158	0.0543726	0.439033	MSMEG_1680	MSMEG_1680
4.04507	4.77907	3.69909	0.0544537	0.439033	MSMEG_3572	MSMEG_3572
1.47812	6.98154	3.68584	0.0548879	0.44053	MSMEG_0029	MSMEG_0029
1.72098	6.86041	3.68573	0.0548917	0.44053	MSMEG_4683	MSMEG_4683
1.34687	7.84389	3.6852	0.054909	0.44053	adk	MSMEG_1484
1.94102	6.31808	3.67866	0.0551246	0.440547	MSMEG_5677	MSMEG_5677
-0.804051	10.453	3.67789	0.0551502	0.440547	MSMEG_6422	MSMEG_6422
1.44326	7.25979	3.67531	0.0552357	0.440547	MSMEG_6352	MSMEG_6352
-2.37864	5.00055	3.6739	0.0552825	0.440547	MSMEG_1983	MSMEG_1983
-1.2297	8.18832	3.67084	0.055384	0.440547	MSMEG_5965	MSMEG_5965
4.07828	4.8798	3.66884	0.0554503	0.440547	MSMEG_2840	MSMEG_2840
1.28035	8.17842	3.66553	0.0555606	0.440709	MSMEG_1684	MSMEG_1684
4.2299	5.3145	3.65915	0.0557736	0.441584	MSMEG_6054	MSMEG_6054
-2.02796	5.90649	3.65467	0.055924	0.441584	MSMEG_6863	MSMEG_6863
-1.12955	8.46786	3.65415	0.0559412	0.441584	MSMEG_3618	MSMEG_3618
4.08472	4.88756	3.64795	0.0561499	0.442519	MSMEG_3270	MSMEG_3270
1.86629	6.43859	3.64187	0.0563555	0.443426	MSMEG_3021	MSMEG_3021
-2.73399	4.63824	3.63482	0.0565944	0.443941	MSMEG_2005	MSMEG_2005
2.53584	5.81434	3.63459	0.0566021	0.443941	MSMEG_3753	MSMEG_3753
-1.01167	8.88475	3.63013	0.0567542	0.443985	MSMEG_6219	MSMEG_6219
2.90932	5.46656	3.62878	0.0568001	0.443985	MSMEG_6604	MSMEG_6604
-0.806422	10.1827	3.62125	0.0570577	0.443985	MSMEG_0403	MSMEG_0403
-1.54133	6.52684	3.6204	0.057087	0.443985	MSMEG_5228	MSMEG_5228
4.06638	4.88012	3.61915	0.0571297	0.443985	MSMEG_6133	MSMEG_6133
4.01324	4.77292	3.61196	0.0573771	0.443985	MSMEG_3488	MSMEG_3488
4.0113	4.77181	3.60978	0.0574526	0.443985	MSMEG_5173	MSMEG_5173
-2.78232	4.76878	3.6094	0.0574656	0.443985	MSMEG_3137	MSMEG_3137
1.09794	8.67839	3.60893	0.0574818	0.443985	hmgA	MSMEG_2075
-0.864466	9.6509	3.60802	0.0575133	0.443985	MSMEG_6329	MSMEG_6329
4.00248	4.76857	3.59353	0.0580167	0.446924	MSMEG_1168	MSMEG_1168
4.00057	4.76746	3.5914	0.0580909	0.446924	MSMEG_0718	MSMEG_0718
1.65808	6.67809	3.58921	0.0581676	0.446924	MSMEG_1195	MSMEG_1195
4.0255	4.85792	3.58382	0.0583568	0.447676	modB	MSMEG_2015
4.04176	4.87077	3.57741	0.0585823	0.448177	MSMEG_1452	MSMEG_1452
-2.32089	4.79242	3.57342	0.0587232	0.448177	MSMEG_2824	MSMEG_2824
-0.900821	9.33994	3.5725	0.0587555	0.448177	MSMEG_6130	MSMEG_6130
3.98612	4.76089	3.56907	0.058877	0.448177	MSMEG_0012	MSMEG_0012
2.88828	5.58528	3.56901	0.0588792	0.448177	MSMEG_2950	MSMEG_2950
4.013	4.8527	3.56379	0.0590647	0.448892	MSMEG_0506	MSMEG_0506
2.88524	5.56737	3.55666	0.0593189	0.450125	MSMEG_6088	MSMEG_6088
2.88519	5.44056	3.54903	0.0595919	0.450549	MSMEG_4507	MSMEG_4507
0.810533	10.1503	3.54773	0.0596389	0.450549	infB	MSMEG_2628
1.75641	6.43339	3.54741	0.0596504	0.450549	MSMEG_3812	MSMEG_3812
-1.20055	8.29523	3.53914	0.0599483	0.45071	MSMEG_4082	MSMEG_4082
-1.3249	7.2312	3.53429	0.0601241	0.45071	MSMEG_4041	MSMEG_4041
-1.5077	6.6027	3.53225	0.0601978	0.45071	MSMEG_6266	MSMEG_6266
2.41361	6.03144	3.53197	0.0602082	0.45071	MSMEG_6882	MSMEG_6882
3.96303	4.75103	3.53126	0.0602339	0.45071	MSMEG_0982	MSMEG_0982
3.96125	4.74992	3.5294	0.0603015	0.45071	MSMEG_6674	MSMEG_6674
0.941116	9.22427	3.52636	0.0604123	0.45071	asnB	MSMEG_2594
-2.41217	4.65028	3.52575	0.0604342	0.45071	MSMEG_3707	MSMEG_3707
1.36316	7.72029	3.52397	0.0604992	0.45071	MSMEG_5377	MSMEG_5377
4.00378	4.8561	3.51448	0.0608468	0.452304	MSMEG_0827	MSMEG_0827
-1.26879	7.67616	3.51309	0.0608978	0.452304	MSMEG_6542	MSMEG_6542
3.94894	4.74442	3.50996	0.0610129	0.452474	ybaK	MSMEG_1913
1.54394	6.79011	3.50386	0.0612377	0.453394	MSMEG_0415	MSMEG_0415
-2.64576	4.59433	3.49863	0.0614315	0.453394	MSMEG_4814	MSMEG_4814
1.39299	7.24792	3.49803	0.0614537	0.453394	purD	MSMEG_5852
-1.25988	7.92371	3.4966	0.0615069	0.453394	MSMEG_0019	MSMEG_0019
1.70848	6.58357	3.49128	0.0617049	0.454074	MSMEG_4431	MSMEG_4431
2.86536	5.60135	3.48288	0.0620185	0.454074	MSMEG_2224	MSMEG_2224
-0.81922	9.88511	3.48265	0.0620274	0.454074	aspA	MSMEG_1677
2.50972	5.73106	3.47911	0.0621601	0.454074	MSMEG_6238	MSMEG_6238
3.97291	4.84329	3.4668	0.0626244	0.454074	MSMEG_6060	MSMEG_6060
1.42656	7.0004	3.46577	0.0626631	0.454074	MSMEG_3596	MSMEG_3596
-0.792822	12.0014	3.46087	0.0628493	0.454074	MSMEG_3890	MSMEG_3890
-1.41552	6.67516	3.46077	0.062853	0.454074	MSMEG_4036	MSMEG_4036
2.83236	5.70477	3.46059	0.0628599	0.454074	MSMEG_5767	MSMEG_5767
2.83108	5.60564	3.45665	0.0630099	0.454074	MSMEG_4566	MSMEG_4566
3.93962	4.75112	3.45324	0.0631399	0.454074	MSMEG_3694	MSMEG_3694
3.93962	4.75112	3.45324	0.0631399	0.454074	MSMEG_4944	MSMEG_4944
-1.88918	6.04207	3.44914	0.0632969	0.454074	MSMEG_0595	MSMEG_0595
1.8014	6.46398	3.44825	0.0633306	0.454074	MSMEG_4686	MSMEG_4686
1.41611	6.93736	3.44453	0.0634735	0.454074	MSMEG_0763	MSMEG_0763
1.0303	8.85573	3.44401	0.0634932	0.454074	MSMEG_5135	MSMEG_5135
2.83535	5.42784	3.44378	0.0635023	0.454074	MSMEG_3415	MSMEG_3415
-2.15123	5.04969	3.44321	0.0635242	0.454074	MSMEG_4466	MSMEG_4466
1.34908	7.30095	3.44311	0.063528	0.454074	MSMEG_1826	MSMEG_1826
1.56647	6.71735	3.43834	0.0637115	0.454074	MSMEG_0941	MSMEG_0941
-0.821938	13.4764	3.43633	0.0637893	0.454074	glgX	MSMEG_6507
-2.33741	5.30558	3.43489	0.0638449	0.454074	MSMEG_0148	MSMEG_0148
1.28737	7.71923	3.43469	0.0638526	0.454074	MSMEG_4237	MSMEG_4237
2.83255	5.65043	3.43381	0.0638868	0.454074	MSMEG_5778	MSMEG_5778
3.92629	4.74555	3.43195	0.0639585	0.454074	MSMEG_4858	MSMEG_4858
1.35823	7.42929	3.4303	0.0640224	0.454074	MSMEG_5130	MSMEG_5130
-0.980752	8.97032	3.4283	0.0641002	0.454074	MSMEG_1253	MSMEG_1253
-2.14248	5.16035	3.42278	0.0643146	0.454935	MSMEG_0557	MSMEG_0557
-1.94643	5.94837	3.41578	0.0645878	0.456047	MSMEG_3955	MSMEG_3955
2.00496	6.20648	3.41232	0.0647234	0.456047	MSMEG_4289	MSMEG_4289
3.91121	4.73885	3.40903	0.0648524	0.456047	MSMEG_3468	MSMEG_3468
-0.783088	11.8472	3.40079	0.0651772	0.456047	MSMEG_1886	MSMEG_1886
2.81727	5.67391	3.39821	0.0652791	0.456047	MSMEG_4966	MSMEG_4966
-2.3705	4.66504	3.39665	0.0653412	0.456047	MSMEG_5099	MSMEG_5099
1.70235	6.53403	3.39324	0.0654765	0.456047	MSMEG_0633	MSMEG_0633
3.89988	4.73439	3.39022	0.0655962	0.456047	MSMEG_2128	MSMEG_2128
-1.20754	8.00439	3.38949	0.0656253	0.456047	MSMEG_5241	MSMEG_5241
1.01544	8.90029	3.38841	0.0656682	0.456047	MSMEG_6356	MSMEG_6356
3.89809	4.73326	3.3884	0.0656688	0.456047	MSMEG_2857	MSMEG_2857
-1.24013	7.24168	3.3879	0.0656884	0.456047	MSMEG_4168	MSMEG_4168
1.17754	8.2928	3.38778	0.0656935	0.456047	MSMEG_5682	MSMEG_5682
1.08102	8.64841	3.38575	0.0657742	0.456047	pyrH	MSMEG_2540
3.91682	4.81976	3.38057	0.0659814	0.456837	MSMEG_0751	MSMEG_0751
1.31933	7.86922	3.37175	0.0663355	0.457082	MSMEG_4448	MSMEG_4448
3.88506	4.72766	3.36805	0.0664845	0.457082	MSMEG_3020	MSMEG_3020
0.773341	10.9126	3.36668	0.0665399	0.457082	MSMEG_5505	MSMEG_5505
3.88333	4.72654	3.36633	0.066554	0.457082	MSMEG_2814	MSMEG_2814
3.88333	4.72654	3.36633	0.066554	0.457082	MSMEG_3759	MSMEG_3759
-2.63012	4.69537	3.36453	0.0666268	0.457082	MSMEG_1962	MSMEG_1962
2.80959	5.47206	3.36167	0.0667426	0.457082	MSMEG_3807	MSMEG_3807
3.90403	4.81441	3.36084	0.0667762	0.457082	MSMEG_2813	MSMEG_2813
-1.97816	5.86538	3.35887	0.0668559	0.457082	MSMEG_1184	MSMEG_1184
2.05727	6.25601	3.3545	0.0670337	0.457197	MSMEG_3127	MSMEG_3127
3.92193	4.83027	3.35283	0.0671016	0.457197	MSMEG_6883	MSMEG_6883
3.87214	4.72205	3.34799	0.0672991	0.457197	MSMEG_1430	MSMEG_1430
3.87044	4.72093	3.34636	0.0673661	0.457197	MSMEG_1944	MSMEG_1944
3.87044	4.72093	3.34636	0.0673661	0.457197	aroQ	MSMEG_2532
3.86876	4.71981	3.34474	0.0674324	0.457197	MSMEG_2991	MSMEG_2991
3.91449	4.82826	3.33818	0.0677016	0.458389	MSMEG_5330	MSMEG_5330
0.816615	9.76611	3.33444	0.0678556	0.458797	typA	MSMEG_5132
1.86357	6.30958	3.32715	0.0681572	0.45932	deoA	MSMEG_1675
3.85766	4.71531	3.32668	0.0681764	0.45932	MSMEG_1536	MSMEG_1536
3.85602	4.71419	3.32515	0.0682401	0.45932	MSMEG_0086	MSMEG_0086
1.91985	6.32211	3.32352	0.0683076	0.45932	MSMEG_0660	MSMEG_0660
1.43781	6.9462	3.31748	0.068559	0.460379	MSMEG_1703	MSMEG_1703
-2.04294	5.55941	3.31177	0.0687975	0.460682	MSMEG_2757	MSMEG_2757
3.89433	4.81949	3.30948	0.0688936	0.460682	MSMEG_5699	MSMEG_5699
-0.810683	13.7154	3.30757	0.0689735	0.460682	rplJ	MSMEG_1364
1.20763	8.19359	3.30366	0.069138	0.460682	MSMEG_4183	MSMEG_4183
3.90072	4.83901	3.30345	0.0691466	0.460682	MSMEG_2790	MSMEG_2790
1.53782	6.87467	3.3029	0.06917	0.460682	MSMEG_5924	MSMEG_5924
1.88614	6.38028	3.30071	0.0692621	0.460682	MSMEG_5716	MSMEG_5716
3.88677	4.81745	3.29483	0.0695104	0.461707	MSMEG_5398	MSMEG_5398
-2.16043	5.34242	3.28996	0.069717	0.462327	MSMEG_3683	MSMEG_3683
3.88062	4.81408	3.28818	0.0697923	0.462327	MSMEG_3922	MSMEG_3922
-1.63387	6.37447	3.28105	0.0700964	0.463714	MSMEG_1745	MSMEG_1745
-2.34629	4.71833	3.27656	0.0702881	0.464356	MSMEG_2884	MSMEG_2884
-2.13467	5.03976	3.26849	0.0706347	0.465201	MSMEG_5234	MSMEG_5234
1.25671	7.76483	3.267	0.0706991	0.465201	gcvP	MSMEG_3642
2.77497	5.56886	3.26544	0.0707663	0.465201	MSMEG_5046	MSMEG_5046
1.46282	6.79543	3.26362	0.0708449	0.465201	pth	MSMEG_5432
-2.29909	5.54773	3.25858	0.0710627	0.465201	MSMEG_6836	MSMEG_6836
1.51077	6.70351	3.25535	0.071203	0.465201	MSMEG_5690	MSMEG_5690
1.2434	7.90983	3.25533	0.0712038	0.465201	MSMEG_1547	MSMEG_1547
0.842956	9.48524	3.25439	0.0712448	0.465201	MSMEG_3185	MSMEG_3185
-2.75691	5.09736	3.25339	0.0712881	0.465201	MSMEG_4810	MSMEG_4810
1.76106	6.35307	3.2505	0.071414	0.465201	MSMEG_2106	MSMEG_2106
1.49197	7.26987	3.24598	0.071611	0.465201	MSMEG_6366	MSMEG_6366
3.8515	4.80209	3.24438	0.071681	0.465201	MSMEG_0260	MSMEG_0260
2.34639	5.96066	3.24377	0.071708	0.465201	MSMEG_6330	MSMEG_6330
1.09053	8.59519	3.24293	0.0717446	0.465201	MSMEG_5526	MSMEG_5526
-2.12335	5.0254	3.23943	0.0718978	0.465578	MSMEG_3298	MSMEG_3298
3.853	4.81928	3.23278	0.0721902	0.46586	MSMEG_4733	MSMEG_4733
1.71006	6.45993	3.23221	0.0722153	0.46586	gabT	MSMEG_6685
1.58933	6.61487	3.23032	0.0722987	0.46586	MSMEG_2360	MSMEG_2360
1.4219	6.90316	3.22981	0.0723214	0.46586	MSMEG_3883	MSMEG_3883
1.24244	7.96546	3.22621	0.0724806	0.466273	MSMEG_2750	MSMEG_2750
2.33821	5.97541	3.2226	0.0726406	0.46669	ribD	MSMEG_3067
1.3214	7.26558	3.2136	0.073041	0.468303	MSMEG_2417	MSMEG_2417
1.64559	6.57986	3.21266	0.0730828	0.468303	MSMEG_5932	MSMEG_5932
0.908701	9.18572	3.20519	0.0734175	0.469833	MSMEG_4217	MSMEG_4217
1.28596	7.53977	3.19841	0.0737225	0.469884	MSMEG_1108	MSMEG_1108
1.34142	7.20364	3.19403	0.07392	0.469884	MSMEG_0464	MSMEG_0464
3.84683	4.81166	3.19359	0.0739398	0.469884	ehuA	MSMEG_5371
-1.70565	6.18937	3.192	0.0740119	0.469884	MSMEG_0622	MSMEG_0622
3.79913	4.70467	3.18941	0.074129	0.469884	MSMEG_1411	MSMEG_1411
2.15882	5.98575	3.18874	0.0741596	0.469884	hisG	MSMEG_4180
2.7316	5.49207	3.18826	0.0741812	0.469884	MSMEG_1180	MSMEG_1180
1.45156	6.8366	3.18802	0.0741921	0.469884	MSMEG_5341	MSMEG_5341
-0.880494	9.31894	3.18502	0.0743286	0.47014	MSMEG_3417	MSMEG_3417
1.37439	6.86179	3.17919	0.0745939	0.470956	MSMEG_4692	MSMEG_4692
2.72552	5.49208	3.17765	0.0746642	0.470956	MSMEG_2749	MSMEG_2749
3.8512	4.88937	3.17587	0.0747458	0.470956	MSMEG_6327	MSMEG_6327
1.31062	7.37111	3.17194	0.0749258	0.471484	MSMEG_5939	MSMEG_5939
2.32578	5.9383	3.16656	0.075173	0.472434	MSMEG_1982	MSMEG_1982
1.20421	8.08193	3.15817	0.0755601	0.474258	MSMEG_0866	MSMEG_0866
1.32021	7.22693	3.14954	0.0759609	0.475945	MSMEG_4321	MSMEG_4321
-0.804883	9.61945	3.14776	0.0760436	0.475945	pntB	MSMEG_0109
3.76872	4.69092	3.14555	0.0761468	0.475945	MSMEG_6199	MSMEG_6199
3.81329	4.79838	3.14404	0.0762172	0.475945	MSMEG_4894	MSMEG_4894
-1.29916	7.64732	3.13486	0.0766475	0.47781	MSMEG_0576	MSMEG_0576
2.3867	5.75466	3.13351	0.0767109	0.47781	MSMEG_1923	MSMEG_1923
-2.07984	5.10526	3.1313	0.0768147	0.47785	MSMEG_3960	MSMEG_3960
0.795194	9.72845	3.12784	0.0769781	0.478044	tsf	MSMEG_2520
0.750487	11.7106	3.12651	0.0770409	0.478044	atpB	MSMEG_4942
-1.82708	6.00407	3.12331	0.0771923	0.478378	MSMEG_6647	MSMEG_6647
1.55778	6.62279	3.11877	0.0774076	0.478637	MSMEG_3766	MSMEG_3766
3.83911	4.89433	3.11796	0.0774461	0.478637	MSMEG_1217	MSMEG_1217
1.4173	6.74957	3.11626	0.0775271	0.478637	MSMEG_6757	MSMEG_6757
-0.755726	12.2279	3.1132	0.0776727	0.478933	MSMEG_5969	MSMEG_5969
3.74219	4.6794	3.10619	0.0780078	0.480395	MSMEG_1121	MSMEG_1121
3.79276	4.86712	3.0892	0.0788262	0.484147	MSMEG_4159	MSMEG_4159
0.854816	9.31381	3.08857	0.0788563	0.484147	hisC	MSMEG_6351
3.72767	4.67248	3.08588	0.0789872	0.484147	MSMEG_6106	MSMEG_6106
1.25682	7.46643	3.08536	0.0790122	0.484147	MSMEG_0550	MSMEG_0550
1.96916	6.10573	3.08214	0.079169	0.484503	MSMEG_0978	MSMEG_0978
1.16532	8.15079	3.07662	0.079438	0.485542	MSMEG_0645	MSMEG_0645
2.36031	5.74929	3.0715	0.0796885	0.486448	MSMEG_6720	MSMEG_6720
3.71339	4.66556	3.06608	0.0799543	0.486448	MSMEG_5063	MSMEG_5063
1.20049	8.09768	3.06606	0.0799557	0.486448	MSMEG_3235	MSMEG_3235
3.76635	4.79567	3.06355	0.0800789	0.486448	MSMEG_2808	MSMEG_2808
-1.11896	8.18979	3.06348	0.0800824	0.486448	MSMEG_5318	MSMEG_5318
3.90774	5.61715	3.05338	0.0805819	0.488877	MSMEG_3701	MSMEG_3701
1.25458	7.52176	3.04946	0.0807767	0.489232	engA	MSMEG_3738
3.70067	4.65976	3.04776	0.0808611	0.489232	MSMEG_5315	MSMEG_5315
3.75591	4.79239	3.04618	0.0809398	0.489232	MSMEG_5147	MSMEG_5147
3.73806	4.76839	3.03361	0.0815687	0.491272	MSMEG_2406	MSMEG_2406
1.87561	6.24559	3.03334	0.0815823	0.491272	MSMEG_5418	MSMEG_5418
1.906	6.19172	3.0304	0.0817303	0.491272	MSMEG_0892	MSMEG_0892
-0.743302	10.1181	3.02903	0.0817993	0.491272	grpE	MSMEG_0710
3.70384	4.67001	3.02876	0.081813	0.491272	MSMEG_3243	MSMEG_3243
3.73974	4.78565	3.02342	0.0820827	0.491272	MSMEG_0992	MSMEG_0992
-1.20166	7.50864	3.02177	0.0821661	0.491272	MSMEG_6423	MSMEG_6423
3.73601	4.78336	3.0199	0.0822611	0.491272	MSMEG_0192	MSMEG_0192
3.72589	4.76394	3.0149	0.082515	0.491272	MSMEG_1901	MSMEG_1901
-0.734141	10.2721	3.01472	0.0825242	0.491272	MSMEG_4497	MSMEG_4497
1.27598	7.38746	3.01401	0.0825602	0.491272	purT	MSMEG_5274
3.72413	4.7628	3.01329	0.0825969	0.491272	MSMEG_2153	MSMEG_2153
1.42739	6.70972	3.01181	0.0826724	0.491272	MSMEG_2940	MSMEG_2940
1.27833	7.21712	3.01166	0.0826803	0.491272	argH	MSMEG_3769
1.42908	6.68703	3.00179	0.0831849	0.493671	MSMEG_6158	MSMEG_6158
1.3673	6.97421	2.99764	0.0833984	0.49434	pgl	MSMEG_3099
1.23794	7.61472	2.99496	0.0835367	0.494341	MSMEG_0057	MSMEG_0057
2.10454	5.96373	2.99237	0.08367	0.494341	MSMEG_2545	MSMEG_2545
3.75187	4.86196	2.99177	0.0837011	0.494341	MSMEG_6792	MSMEG_6792
3.71156	4.77444	2.98257	0.0841781	0.496237	MSMEG_4579	MSMEG_4579
2.64457	5.39656	2.9816	0.0842288	0.496237	MSMEG_1209	MSMEG_1209
1.42162	6.80797	2.97973	0.0843258	0.496237	MSMEG_5374	MSMEG_5374
-1.21945	6.85329	2.9776	0.0844369	0.496295	MSMEG_0452	MSMEG_0452
-2.15611	4.97436	2.9719	0.0847349	0.49745	MSMEG_6049	MSMEG_6049
2.06187	6.02261	2.96718	0.0849826	0.498066	MSMEG_0052	MSMEG_0052
-0.720304	10.6615	2.96603	0.0850431	0.498066	trxB	MSMEG_6933
2.64795	5.55491	2.9637	0.0851656	0.498188	MSMEG_4972	MSMEG_4972
2.6172	5.72758	2.95356	0.0857015	0.498624	pdxH	MSMEG_5675
-1.35581	6.54715	2.95198	0.0857849	0.498624	MSMEG_2246	MSMEG_2246
2.12667	5.87072	2.94967	0.0859079	0.498624	MSMEG_3153	MSMEG_3153
2.31688	5.72257	2.94879	0.0859547	0.498624	MSMEG_1278	MSMEG_1278
0.803977	9.50525	2.94603	0.0861013	0.498624	MSMEG_5775	MSMEG_5775
0.720818	10.3803	2.94555	0.086127	0.498624	MSMEG_6391	MSMEG_6391
3.78239	5.0665	2.94504	0.086154	0.498624	MSMEG_1314	MSMEG_1314
1.26917	7.14037	2.94389	0.0862155	0.498624	MSMEG_3690	MSMEG_3690
2.64436	5.57028	2.94088	0.0863765	0.498624	MSMEG_5679	MSMEG_5679
1.44868	6.91664	2.93939	0.0864561	0.498624	gatA	MSMEG_2365
2.08759	5.94447	2.93769	0.0865472	0.498624	MSMEG_6153	MSMEG_6153
1.24719	7.38983	2.93478	0.086703	0.498624	MSMEG_0026	MSMEG_0026
3.66795	4.73921	2.93391	0.0867499	0.498624	MSMEG_6100	MSMEG_6100
1.29568	7.00146	2.93383	0.0867541	0.498624	MSMEG_2174	MSMEG_2174
1.44808	6.72305	2.93361	0.0867659	0.498624	MSMEG_4912	MSMEG_4912
1.12439	8.18876	2.92972	0.0869754	0.499243	MSMEG_0133	MSMEG_0133
1.23953	7.46745	2.92218	0.0873824	0.500992	MSMEG_0635	MSMEG_0635
1.75712	6.28943	2.91817	0.0876	0.501653	MSMEG_1304	MSMEG_1304
1.48628	6.61392	2.91564	0.0877372	0.501853	MSMEG_6539	MSMEG_6539
1.45443	6.70324	2.90901	0.0880986	0.503332	MSMEG_5057	MSMEG_5057
-0.722461	11.7156	2.90666	0.0882269	0.503479	ahcY	MSMEG_1843
-1.17746	7.09283	2.90358	0.0883958	0.503702	MSMEG_5573	MSMEG_5573
-1.59729	6.19797	2.90067	0.0885556	0.503702	MSMEG_3784	MSMEG_3784
1.53397	6.55774	2.89871	0.0886632	0.503702	MSMEG_6512	MSMEG_6512
-2.15681	5.04051	2.89739	0.0887358	0.503702	MSMEG_0338	MSMEG_0338
3.67721	4.76081	2.89507	0.0888638	0.503702	thiL	MSMEG_2398
1.69858	6.40009	2.89466	0.0888861	0.503702	MSMEG_1260	MSMEG_1260
-2.01097	5.06552	2.89185	0.0890411	0.503702	MSMEG_3821	MSMEG_3821
1.28663	7.08767	2.88976	0.0891567	0.503702	MSMEG_3647	MSMEG_3647
-1.93538	5.40324	2.88915	0.0891907	0.503702	MSMEG_2363	MSMEG_2363
1.55279	6.58042	2.88623	0.0893526	0.504035	MSMEG_4908	MSMEG_4908
3.62283	4.64573	2.88283	0.0895412	0.504224	MSMEG_6808	MSMEG_6808
-1.30442	7.28443	2.88114	0.0896352	0.504224	MSMEG_6486	MSMEG_6486
-1.44057	6.44722	2.88007	0.0896947	0.504224	MSMEG_5772	MSMEG_5772
1.35022	6.82618	2.87562	0.0899433	0.504885	cysT	MSMEG_4532
0.803258	9.41656	2.87144	0.0901767	0.504885	rplU	MSMEG_4625
3.65651	4.75169	2.86829	0.0903534	0.504885	MSMEG_6567	MSMEG_6567
1.20832	7.64714	2.86479	0.09055	0.504885	MSMEG_6116	MSMEG_6116
3.60927	4.63981	2.86382	0.0906046	0.504885	cbiQ	MSMEG_2609
3.60797	4.63866	2.86295	0.0906538	0.504885	MSMEG_1294	MSMEG_1294
3.66106	4.77027	2.86236	0.0906873	0.504885	MSMEG_5886	MSMEG_5886
1.43606	6.68866	2.86187	0.090715	0.504885	cofD	MSMEG_1830
1.10676	8.12343	2.86143	0.0907392	0.504885	MSMEG_5442	MSMEG_5442
-2.08926	5.0748	2.85602	0.0910449	0.50548	MSMEG_4055	MSMEG_4055
2.60899	5.47245	2.85426	0.091145	0.50548	MSMEG_2433	MSMEG_2433
1.53238	6.5151	2.85407	0.0911555	0.50548	MSMEG_0227	MSMEG_0227
1.21367	7.64666	2.84812	0.0914936	0.505734	MSMEG_4265	MSMEG_4265
-1.32373	6.66133	2.84759	0.0915239	0.505734	MSMEG_0020	MSMEG_0020
3.59713	4.63501	2.84601	0.091614	0.505734	MSMEG_1063	MSMEG_1063
3.59713	4.63501	2.84601	0.091614	0.505734	MSMEG_2211	MSMEG_2211
0.765021	9.65788	2.84357	0.0917531	0.505932	MSMEG_4535	MSMEG_4535
2.59954	5.48951	2.83591	0.0921915	0.50724	prpB	MSMEG_6646
1.24585	7.11415	2.83581	0.0921972	0.50724	MSMEG_2615	MSMEG_2615
1.02562	8.53236	2.8288	0.0926	0.507993	MSMEG_5792	MSMEG_5792
2.10103	5.81162	2.82712	0.092697	0.507993	MSMEG_2679	MSMEG_2679
1.42066	6.65037	2.82675	0.0927185	0.507993	MSMEG_6179	MSMEG_6179
3.58143	4.62678	2.82623	0.0927486	0.507993	MSMEG_5331	MSMEG_5331
-1.81481	5.77041	2.81384	0.0934669	0.509762	MSMEG_2898	MSMEG_2898
3.56956	4.62196	2.80908	0.0937449	0.509762	MSMEG_0256	MSMEG_0256
3.56956	4.62196	2.80908	0.0937449	0.509762	MSMEG_0310	MSMEG_0310
1.19804	7.32516	2.80901	0.0937489	0.509762	MSMEG_5517	MSMEG_5517
3.56841	4.62082	2.80844	0.0937825	0.509762	MSMEG_5491	MSMEG_5491
-1.90617	5.57945	2.8082	0.0937964	0.509762	MSMEG_1979	MSMEG_1979
-1.12362	7.62699	2.80815	0.0937995	0.509762	MSMEG_2605	MSMEG_2605
3.77516	5.33925	2.80378	0.0940551	0.510419	MSMEG_3319	MSMEG_3319
2.58486	5.46163	2.80252	0.0941288	0.510419	MSMEG_5877	MSMEG_5877
1.20024	7.49055	2.79428	0.0946142	0.512417	scpA	MSMEG_3742
3.55556	4.61485	2.79102	0.0948064	0.512417	MSMEG_0089	MSMEG_0089
-1.89448	5.602	2.79095	0.0948107	0.512417	MSMEG_3787	MSMEG_3787
1.27259	7.04985	2.78653	0.0950727	0.512782	murC	MSMEG_4226
1.22444	7.5413	2.7849	0.0951694	0.512782	MSMEG_2696	MSMEG_2696
1.19959	7.55367	2.78273	0.0952984	0.512782	MSMEG_3885	MSMEG_3885
1.11113	8.13316	2.77963	0.095483	0.512782	ccsB	MSMEG_0974
1.22692	7.09157	2.7773	0.0956219	0.512782	MSMEG_5770	MSMEG_5770
1.07773	8.2945	2.7742	0.095807	0.512782	rplR	MSMEG_1471
3.54288	4.60886	2.77399	0.0958197	0.512782	MSMEG_3921	MSMEG_3921
3.54288	4.60886	2.77399	0.0958197	0.512782	MSMEG_4173	MSMEG_4173
3.54288	4.60886	2.77399	0.0958197	0.512782	MSMEG_0578	MSMEG_0578
0.789589	9.41475	2.7693	0.0961008	0.513306	MSMEG_1738	MSMEG_1738
3.66967	4.94727	2.76865	0.09614	0.513306	MSMEG_6019	MSMEG_6019
1.98846	6.03974	2.76678	0.0962524	0.513306	MSMEG_3861	MSMEG_3861
3.58005	4.72082	2.76335	0.096459	0.513306	MSMEG_5208	MSMEG_5208
3.58005	4.72082	2.76335	0.096459	0.513306	MSMEG_5218	MSMEG_5218
2.529	5.27605	2.76191	0.0965458	0.513306	MSMEG_3850	MSMEG_3850
1.16199	7.79453	2.75514	0.0969552	0.514923	MSMEG_3749	MSMEG_3749
-1.22879	6.93297	2.75159	0.0971703	0.515507	MSMEG_6009	MSMEG_6009
-1.09974	7.93627	2.7432	0.0976818	0.517661	MSMEG_0934	MSMEG_0934
2.55087	5.42293	2.73418	0.0982347	0.519482	MSMEG_5691	MSMEG_5691
2.07729	5.78943	2.73396	0.0982482	0.519482	MSMEG_4657	MSMEG_4657
1.1805	7.7325	2.73114	0.0984218	0.519482	MSMEG_4240	MSMEG_4240
-1.38016	6.47088	2.72946	0.0985251	0.519482	MSMEG_1854	MSMEG_1854
0.753306	9.8867	2.72897	0.0985553	0.519482	MSMEG_1247	MSMEG_1247
-0.912105	8.76818	2.72629	0.0987213	0.519798	MSMEG_1914	MSMEG_1914
3.55043	4.70816	2.72412	0.0988553	0.519945	MSMEG_0757	MSMEG_0757
1.76449	6.28469	2.72093	0.0990531	0.520181	MSMEG_3301	MSMEG_3301
-1.84202	5.63068	2.71997	0.0991125	0.520181	MSMEG_4510	MSMEG_4510
-1.99244	5.27569	2.71304	0.0995438	0.521886	MSMEG_4008	MSMEG_4008
0.776082	9.44439	2.7112	0.0996587	0.52193	ilvE	MSMEG_4276
2.23886	5.63849	2.70608	0.0999794	0.523051	MSMEG_6428	MSMEG_6428
2.49964	5.2633	2.70413	0.100101	0.523131	MSMEG_1698	MSMEG_1698
1.16098	7.59186	2.68406	0.10137	0.529196	MSMEG_0670	MSMEG_0670
0.74991	9.65989	2.67623	0.10187	0.530866	ilvA	MSMEG_3183
1.1082	7.97611	2.67526	0.101932	0.530866	map	MSMEG_1485
-1.27786	6.63197	2.67353	0.102042	0.530866	MSMEG_6653	MSMEG_6653
-1.93612	5.24914	2.6706	0.10223	0.530866	MSMEG_2049	MSMEG_2049
-1.91224	5.05749	2.67059	0.102231	0.530866	MSMEG_6317	MSMEG_6317
1.64991	6.36156	2.6639	0.102661	0.531847	MSMEG_3314	MSMEG_3314
0.716995	9.94562	2.66276	0.102735	0.531847	MSMEG_6540	MSMEG_6540
1.47736	6.56508	2.6626	0.102746	0.531847	ampC	MSMEG_3978
-1.66026	6.02338	2.65871	0.102997	0.532585	MSMEG_2958	MSMEG_2958
1.38898	6.61807	2.65687	0.103116	0.532641	MSMEG_3181	MSMEG_3181
-1.92365	5.66002	2.64751	0.103725	0.535223	MSMEG_3202	MSMEG_3202
-0.729459	13.9785	2.63959	0.104243	0.536722	gyrB	MSMEG_0005
-1.12561	7.4301	2.63714	0.104404	0.536722	MSMEG_5100	MSMEG_5100
1.42591	6.58046	2.63536	0.104521	0.536722	MSMEG_4826	MSMEG_4826
1.04716	8.2174	2.62743	0.105044	0.536722	eno	MSMEG_5415
1.89149	5.95885	2.62719	0.10506	0.536722	MSMEG_0375	MSMEG_0375
3.51717	4.78819	2.62423	0.105256	0.536722	MSMEG_5657	MSMEG_5657
2.48549	5.31292	2.62278	0.105353	0.536722	fmt	MSMEG_3064
-2.456	4.80665	2.62254	0.105368	0.536722	MSMEG_6420	MSMEG_6420
-1.85779	5.54119	2.62243	0.105376	0.536722	MSMEG_0486	MSMEG_0486
3.47571	4.6082	2.62045	0.105507	0.536722	MSMEG_2108	MSMEG_2108
3.47571	4.6082	2.62045	0.105507	0.536722	MSMEG_3826	MSMEG_3826
1.14573	7.57506	2.61839	0.105645	0.536722	MSMEG_1600	MSMEG_1600
3.51438	4.71703	2.61777	0.105686	0.536722	MSMEG_0716	MSMEG_0716
-0.673566	10.6753	2.61742	0.105709	0.536722	rplM	MSMEG_1556
1.02644	8.32803	2.61715	0.105727	0.536722	MSMEG_1353	MSMEG_1353
0.891128	8.82109	2.61494	0.105874	0.536722	dxs	MSMEG_2776
-0.865046	8.87373	2.6149	0.105877	0.536722	MSMEG_3022	MSMEG_3022
2.17295	5.79146	2.61083	0.106149	0.53734	MSMEG_5074	MSMEG_5074
-1.59535	6.00976	2.60979	0.106218	0.53734	MSMEG_0142	MSMEG_0142
1.32596	6.76679	2.6068	0.106419	0.537802	mnmA	MSMEG_2358
2.46688	5.30801	2.59204	0.107415	0.542275	MSMEG_1998	MSMEG_1998
-1.55368	6.21066	2.58087	0.108175	0.544916	MSMEG_0593	MSMEG_0593
2.43969	5.23173	2.5784	0.108344	0.544916	MSMEG_3090	MSMEG_3090
3.48005	4.70302	2.574	0.108646	0.544916	MSMEG_4743	MSMEG_4743
-0.852365	8.94041	2.57238	0.108757	0.544916	ppa	MSMEG_6114
1.1537	7.40637	2.57232	0.108761	0.544916	MSMEG_0076	MSMEG_0076
2.46528	5.6989	2.57232	0.108761	0.544916	MSMEG_6293	MSMEG_6293
2.43741	5.22832	2.56943	0.10896	0.544916	hutH	MSMEG_1183
1.36121	6.70612	2.56811	0.109051	0.544916	nrdR	MSMEG_2743
0.931278	8.67737	2.56687	0.109136	0.544916	metK	MSMEG_3055
-2.19218	4.62695	2.56593	0.109201	0.544916	MSMEG_3560	MSMEG_3560
3.43302	4.58875	2.56579	0.109211	0.544916	MSMEG_5193	MSMEG_5193
-1.98463	5.22712	2.5649	0.109272	0.544916	MSMEG_5884	MSMEG_5884
2.18566	5.60603	2.5587	0.109702	0.545252	MSMEG_4681	MSMEG_4681
-1.82179	5.35962	2.55412	0.11002	0.545252	MSMEG_6545	MSMEG_6545
-1.99296	4.69029	2.55368	0.110051	0.545252	MSMEG_5533	MSMEG_5533
-1.71083	5.9598	2.55068	0.11026	0.545252	MSMEG_6490	MSMEG_6490
2.46451	5.40212	2.54981	0.11032	0.545252	MSMEG_4379	MSMEG_4379
3.41862	4.58147	2.54827	0.110428	0.545252	MSMEG_0253	MSMEG_0253
3.41862	4.58147	2.54827	0.110428	0.545252	MSMEG_3037	MSMEG_3037
3.41862	4.58147	2.54827	0.110428	0.545252	MSMEG_5229	MSMEG_5229
3.41768	4.58032	2.54793	0.110452	0.545252	MSMEG_3062	MSMEG_3062
3.41768	4.58032	2.54793	0.110452	0.545252	MSMEG_4606	MSMEG_4606
-2.01791	5.36597	2.54273	0.110816	0.546008	MSMEG_3985	MSMEG_3985
-0.834397	9.05351	2.53993	0.111013	0.546008	MSMEG_1950	MSMEG_1950
1.22891	6.85027	2.5395	0.111043	0.546008	MSMEG_6180	MSMEG_6180
1.17984	7.40666	2.53939	0.111051	0.546008	MSMEG_4221	MSMEG_4221
0.808546	9.1269	2.53498	0.111361	0.546567	MSMEG_3619	MSMEG_3619
1.40124	6.63553	2.53461	0.111387	0.546567	MSMEG_3667	MSMEG_3667
3.40544	4.57533	2.53159	0.111601	0.546615	MSMEG_5551	MSMEG_5551
3.40454	4.57418	2.53131	0.11162	0.546615	MSMEG_0038	MSMEG_0038
2.42069	5.21729	2.52966	0.111737	0.546641	MSMEG_6220	MSMEG_6220
1.04298	8.2064	2.52335	0.112185	0.548287	MSMEG_6762	MSMEG_6762
1.17919	7.06088	2.51895	0.112498	0.54927	MSMEG_4322	MSMEG_4322
-1.99096	4.71535	2.51184	0.113007	0.550958	MSMEG_6751	MSMEG_6751
1.37188	6.65062	2.51035	0.113114	0.550958	MSMEG_1169	MSMEG_1169
2.45873	5.44106	2.50941	0.113181	0.550958	MSMEG_3304	MSMEG_3304
2.15734	5.6625	2.50675	0.113373	0.551342	tynA	MSMEG_3847
2.45116	5.42418	2.50442	0.11354	0.551611	MSMEG_2574	MSMEG_2574
2.42988	5.28389	2.50025	0.113841	0.551897	MSMEG_2368	MSMEG_2368
3.3789	4.56186	2.49931	0.113909	0.551897	MSMEG_3262	MSMEG_3262
3.41994	4.67947	2.4963	0.114127	0.551897	MSMEG_4162	MSMEG_4162
3.41864	4.67831	2.49553	0.114183	0.551897	MSMEG_1330	MSMEG_1330
3.41864	4.67831	2.49553	0.114183	0.551897	MSMEG_5081	MSMEG_5081
3.46984	4.82324	2.49426	0.114275	0.551897	MSMEG_0771	MSMEG_0771
1.94927	5.87254	2.48957	0.114616	0.552999	MSMEG_0188	MSMEG_0188
0.945434	8.63048	2.48203	0.115166	0.555109	MSMEG_0929	MSMEG_0929
3.4041	4.67239	2.47718	0.115522	0.555118	MSMEG_2402	MSMEG_2402
-0.826106	8.97277	2.47647	0.115575	0.555118	MSMEG_1937	MSMEG_1937
3.40164	4.67007	2.47583	0.115621	0.555118	MSMEG_0175	MSMEG_0175
3.40164	4.67007	2.47583	0.115621	0.555118	MSMEG_3110	MSMEG_3110
-1.0702	7.79592	2.47306	0.115825	0.555553	MSMEG_3375	MSMEG_3375
1.89844	5.98581	2.46874	0.116144	0.556536	MSMEG_6098	MSMEG_6098
2.38116	5.20353	2.46187	0.116653	0.558325	MSMEG_5088	MSMEG_5088
-0.66137	10.3407	2.46063	0.116745	0.558325	katA	MSMEG_6232
2.40736	5.2748	2.45716	0.117003	0.558885	MSMEG_2760	MSMEG_2760
1.13579	7.47164	2.45597	0.117092	0.558885	MSMEG_2788	MSMEG_2788
-1.93698	5.12073	2.45447	0.117204	0.558885	MSMEG_6134	MSMEG_6134
3.38807	4.68144	2.44943	0.11758	0.559469	MSMEG_0563	MSMEG_0563
1.23144	6.8014	2.44715	0.117752	0.559469	MSMEG_4559	MSMEG_4559
3.41866	4.77167	2.44661	0.117792	0.559469	MSMEG_5207	MSMEG_5207
-0.655736	11.3901	2.44543	0.11788	0.559469	glcB	MSMEG_3640
3.37444	4.65935	2.44112	0.118205	0.559469	MSMEG_5407	MSMEG_5407
0.938329	8.59648	2.441	0.118214	0.559469	MSMEG_2695	MSMEG_2695
1.91351	5.90103	2.44083	0.118227	0.559469	map	MSMEG_5050
3.45512	4.89068	2.4396	0.118319	0.559469	hypC	MSMEG_2274
1.64801	6.21579	2.43871	0.118387	0.559469	MSMEG_6824	MSMEG_6824
1.11563	7.48608	2.43763	0.118468	0.559469	dnaG	MSMEG_4482
3.41527	4.78584	2.43577	0.118609	0.559487	speB	MSMEG_3535
-1.88992	4.90321	2.4339	0.11875	0.559487	sdhA	MSMEG_0418
1.14955	7.27638	2.43306	0.118814	0.559487	MSMEG_3646	MSMEG_3646
1.7771	6.03704	2.42705	0.11927	0.560066	MSMEG_5784	MSMEG_5784
1.41486	6.4689	2.42669	0.119298	0.560066	MSMEG_0210	MSMEG_0210
3.39976	4.76364	2.42465	0.119453	0.560066	MSMEG_6876	MSMEG_6876
3.35945	4.65223	2.42357	0.119535	0.560066	MSMEG_6872	MSMEG_6872
2.38523	5.28706	2.42048	0.119771	0.560066	MSMEG_6457	MSMEG_6457
1.08371	7.72534	2.41772	0.119982	0.560066	MSMEG_6285	MSMEG_6285
1.30344	6.70983	2.41679	0.120053	0.560066	glpK	MSMEG_6229
2.38673	5.28488	2.41634	0.120088	0.560066	MSMEG_0301	MSMEG_0301
1.9082	5.92168	2.41506	0.120187	0.560066	MSMEG_6765	MSMEG_6765
-1.76697	5.5464	2.41146	0.120463	0.560066	MSMEG_0887	MSMEG_0887
0.664956	10.2639	2.41132	0.120474	0.560066	MSMEG_0032	MSMEG_0032
-1.91805	4.66694	2.41097	0.120501	0.560066	MSMEG_2022	MSMEG_2022
1.05757	7.84819	2.41058	0.12053	0.560066	rbfA	MSMEG_2629
2.04282	5.89755	2.41	0.120576	0.560066	MSMEG_0483	MSMEG_0483
3.34578	4.64626	2.40694	0.120811	0.560066	phhB	MSMEG_5150
-2.03275	5.25858	2.40568	0.120909	0.560066	MSMEG_6878	MSMEG_6878
-0.647334	10.5457	2.40063	0.121299	0.560066	acpP	MSMEG_4326
3.34456	4.66232	2.39701	0.12158	0.560066	MSMEG_1578	MSMEG_1578
1.15658	7.0098	2.39659	0.121613	0.560066	MSMEG_5262	MSMEG_5262
3.38377	4.77437	2.39648	0.121622	0.560066	MSMEG_1386	MSMEG_1386
3.38377	4.77437	2.39648	0.121622	0.560066	MSMEG_2869	MSMEG_2869
1.35173	6.59696	2.3961	0.121651	0.560066	MSMEG_0226	MSMEG_0226
2.38719	5.4407	2.39552	0.121696	0.560066	MSMEG_5557	MSMEG_5557
2.40353	5.43575	2.39386	0.121825	0.560066	MSMEG_5843	MSMEG_5843
2.36829	5.29732	2.39224	0.121952	0.560066	MSMEG_5825	MSMEG_5825
2.39327	5.35178	2.3912	0.122033	0.560066	fabG	MSMEG_2206
1.61876	6.24032	2.39077	0.122066	0.560066	MSMEG_1646	MSMEG_1646
2.39001	5.45271	2.38727	0.12234	0.560066	purE	MSMEG_1820
-1.01208	7.96049	2.38644	0.122405	0.560066	tpx	MSMEG_3479
1.11787	7.54	2.38588	0.122449	0.560066	leuB	MSMEG_2379
1.94579	6.14748	2.3855	0.122479	0.560066	MSMEG_6728	MSMEG_6728
-0.653572	11.8329	2.38392	0.122603	0.560111	glf	MSMEG_6404
1.85512	6.04285	2.37868	0.123014	0.560999	MSMEG_5004	MSMEG_5004
-2.5458	4.70557	2.37701	0.123146	0.560999	MSMEG_1105	MSMEG_1105
1.08052	7.85289	2.3749	0.123312	0.560999	MSMEG_4336	MSMEG_4336
0.727757	9.42294	2.37332	0.123437	0.560999	rplA	MSMEG_1347
-1.4728	6.22866	2.37143	0.123586	0.560999	MSMEG_1116	MSMEG_1116
-0.873771	8.66599	2.37066	0.123648	0.560999	rplO	MSMEG_1474
-1.98583	4.85138	2.36934	0.123752	0.560999	MSMEG_0699	MSMEG_0699
-0.652462	11.8616	2.36928	0.123757	0.560999	gyrA	MSMEG_0006
2.35378	5.25585	2.36342	0.124223	0.560999	MSMEG_0843	MSMEG_0843
-2.0596	4.57226	2.36144	0.12438	0.560999	MSMEG_5317	MSMEG_5317
-1.89866	4.67295	2.36101	0.124415	0.560999	MSMEG_2126	MSMEG_2126
1.07624	7.50265	2.36039	0.124464	0.560999	MSMEG_5121	MSMEG_5121
2.36423	5.3631	2.35997	0.124497	0.560999	MSMEG_4975	MSMEG_4975
1.53488	6.28859	2.35917	0.124561	0.560999	MSMEG_6662	MSMEG_6662
2.38111	5.5088	2.35868	0.124601	0.560999	MSMEG_4019	MSMEG_4019
1.27152	6.68389	2.35788	0.124664	0.560999	MSMEG_6741	MSMEG_6741
1.8634	5.98887	2.3569	0.124743	0.560999	MSMEG_4357	MSMEG_4357
1.55997	6.24136	2.35279	0.125072	0.561963	MSMEG_4199	MSMEG_4199
1.27183	6.72795	2.3492	0.12536	0.562115	MSMEG_4353	MSMEG_4353
-0.640682	10.9422	2.34821	0.12544	0.562115	dnaK	MSMEG_0709
-0.649731	10.3385	2.34789	0.125465	0.562115	MSMEG_5580	MSMEG_5580
1.44286	6.48145	2.34557	0.125652	0.562115	xerC	MSMEG_2515
2.0895	5.60384	2.3445	0.125739	0.562115	MSMEG_0562	MSMEG_0562
1.35764	6.56038	2.34359	0.125812	0.562115	MSMEG_1839	MSMEG_1839
2.36815	5.39211	2.3409	0.12603	0.562115	MSMEG_5810	MSMEG_5810
1.79924	5.91515	2.33966	0.12613	0.562115	MSMEG_5399	MSMEG_5399
1.29683	6.58778	2.33921	0.126166	0.562115	galU	MSMEG_5471
-2.42101	4.68459	2.33815	0.126252	0.562115	MSMEG_6345	MSMEG_6345
2.3416	5.26663	2.33244	0.126716	0.563668	MSMEG_5203	MSMEG_5203
2.33893	5.24733	2.32927	0.126974	0.564303	MSMEG_2934	MSMEG_2934
-2.05489	4.59821	2.32539	0.127292	0.565202	MSMEG_2870	MSMEG_2870
2.34621	5.74413	2.32234	0.127541	0.565347	MSMEG_2006	MSMEG_2006
2.08824	5.60914	2.32217	0.127555	0.565347	MSMEG_4394	MSMEG_4394
0.837548	8.8703	2.31934	0.127788	0.565458	MSMEG_4256	MSMEG_4256
2.31165	5.16785	2.31906	0.127811	0.565458	MSMEG_3244	MSMEG_3244
-2.37773	4.60263	2.31699	0.12798	0.565545	MSMEG_6503	MSMEG_6503
1.35261	6.55269	2.31601	0.128061	0.565545	MSMEG_6898	MSMEG_6898
3.3651	4.89492	2.31349	0.128268	0.565951	MSMEG_4565	MSMEG_4565
-0.71308	9.48209	2.30693	0.128811	0.567835	MSMEG_6768	MSMEG_6768
1.8542	5.94217	2.30298	0.129139	0.568768	MSMEG_1284	MSMEG_1284
-0.94087	8.38794	2.29723	0.129618	0.569018	MSMEG_5091	MSMEG_5091
3.27288	4.55419	2.29691	0.129645	0.569018	MSMEG_5116	MSMEG_5116
3.27288	4.55419	2.29691	0.129645	0.569018	MSMEG_5532	MSMEG_5532
-1.5366	6.03672	2.29658	0.129672	0.569018	MSMEG_1970	MSMEG_1970
3.41876	5.13107	2.29453	0.129844	0.569018	MSMEG_0265	MSMEG_0265
-1.9835	5.78652	2.29351	0.129929	0.569018	MSMEG_2548	MSMEG_2548
-0.64653	10.0596	2.29256	0.130008	0.569018	MSMEG_1870	MSMEG_1870
-1.70388	5.50209	2.29062	0.130171	0.569133	MSMEG_3307	MSMEG_3307
0.898973	8.56306	2.28948	0.130267	0.569133	MSMEG_6084	MSMEG_6084
0.909345	8.5122	2.28496	0.130647	0.570284	cysA	MSMEG_4530
3.25802	4.54673	2.28016	0.131052	0.57033	MSMEG_2245	MSMEG_2245
3.25802	4.54673	2.28016	0.131052	0.57033	MSMEG_0444	MSMEG_0444
-0.708884	9.4036	2.28007	0.131058	0.57033	MSMEG_1515	MSMEG_1515
-1.7908	4.80024	2.27932	0.131122	0.57033	MSMEG_0199	MSMEG_0199
-2.30064	4.47064	2.27278	0.131677	0.572233	MSMEG_2994	MSMEG_2994
1.3657	6.54265	2.27096	0.131831	0.572396	MSMEG_5835	MSMEG_5835
2.28587	5.15589	2.26911	0.131989	0.572575	MSMEG_3412	MSMEG_3412
-1.40234	6.13433	2.26759	0.132118	0.572615	MSMEG_4742	MSMEG_4742
3.24426	4.54043	2.26407	0.132418	0.572615	MSMEG_5040	MSMEG_5040
3.24352	4.53927	2.26399	0.132426	0.572615	MSMEG_0657	MSMEG_0657
3.27848	4.65219	2.2603	0.132742	0.572615	hisD	MSMEG_5656
-1.89428	4.81666	2.25793	0.132944	0.572615	MSMEG_3685	MSMEG_3685
-1.92858	4.90268	2.25547	0.133156	0.572615	MSMEG_4005	MSMEG_4005
1.14217	7.05041	2.25541	0.133161	0.572615	MSMEG_5617	MSMEG_5617
-0.635484	11.8814	2.24969	0.133654	0.572615	MSMEG_0071	MSMEG_0071
3.23006	4.53295	2.2484	0.133765	0.572615	MSMEG_1405	MSMEG_1405
3.23006	4.53295	2.2484	0.133765	0.572615	MSMEG_1999	MSMEG_1999
3.23006	4.53295	2.2484	0.133765	0.572615	MSMEG_6813	MSMEG_6813
3.23006	4.53295	2.2484	0.133765	0.572615	MSMEG_6893	MSMEG_6893
3.22938	4.53179	2.24838	0.133767	0.572615	MSMEG_6046	MSMEG_6046
-2.35479	4.6785	2.24555	0.134012	0.572615	MSMEG_3726	MSMEG_3726
-1.65639	5.79782	2.24457	0.134097	0.572615	MSMEG_5964	MSMEG_5964
-2.31772	4.58084	2.241	0.134407	0.572615	MSMEG_2157	MSMEG_2157
1.47296	6.2794	2.23797	0.134671	0.572615	lipB	MSMEG_4285
1.8467	6.2718	2.23789	0.134678	0.572615	MSMEG_4193	MSMEG_4193
-1.51631	6.00752	2.23587	0.134853	0.572615	MSMEG_5117	MSMEG_5117
-1.07142	6.93221	2.23479	0.134948	0.572615	MSMEG_1151	MSMEG_1151
3.21621	4.52546	2.23329	0.135079	0.572615	MSMEG_1362	MSMEG_1362
3.21621	4.52546	2.23329	0.135079	0.572615	MSMEG_5795	MSMEG_5795
3.21684	4.52662	2.23325	0.135082	0.572615	MSMEG_3388	MSMEG_3388
3.21684	4.52662	2.23325	0.135082	0.572615	MSMEG_6682	MSMEG_6682
1.32438	6.47959	2.23051	0.135322	0.572615	MSMEG_3873	MSMEG_3873
1.7477	5.92799	2.2299	0.135375	0.572615	MSMEG_6289	MSMEG_6289
2.03229	5.67902	2.22903	0.135451	0.572615	MSMEG_4358	MSMEG_4358
-0.629934	10.521	2.22842	0.135505	0.572615	MSMEG_6746	MSMEG_6746
-2.3323	4.65966	2.22702	0.135628	0.572615	MSMEG_1971	MSMEG_1971
3.28586	4.74882	2.22665	0.135661	0.572615	soxR	MSMEG_5450
3.24764	4.64006	2.22404	0.13589	0.572615	MSMEG_6787	MSMEG_6787
2.03995	5.62377	2.22361	0.135927	0.572615	MSMEG_5343	MSMEG_5343
2.285	5.25023	2.22334	0.135952	0.572615	MSMEG_0434	MSMEG_0434
1.34966	6.54093	2.22062	0.136191	0.572615	MSMEG_3859	MSMEG_3859
2.04797	5.47037	2.22033	0.136217	0.572615	MSMEG_0830	MSMEG_0830
2.26211	5.87737	2.21721	0.136492	0.572615	MSMEG_3409	MSMEG_3409
0.872626	8.62526	2.2159	0.136608	0.572615	MSMEG_2415	MSMEG_2415
0.684855	9.59096	2.21367	0.136806	0.572615	rpsE	MSMEG_1472
-1.01435	7.10739	2.21131	0.137015	0.572615	MSMEG_5502	MSMEG_5502
-1.9722	4.55484	2.20786	0.137322	0.572615	MSMEG_0963	MSMEG_0963
1.4272	6.34748	2.20697	0.137401	0.572615	truB	MSMEG_2649
0.86429	8.68989	2.20543	0.137538	0.572615	ndk	MSMEG_4627
1.84087	5.85056	2.20488	0.137588	0.572615	MSMEG_0644	MSMEG_0644
3.19062	4.51276	2.20439	0.137632	0.572615	MSMEG_5034	MSMEG_5034
3.19062	4.51276	2.20439	0.137632	0.572615	MSMEG_5411	MSMEG_5411
3.19062	4.51276	2.20439	0.137632	0.572615	MSMEG_6378	MSMEG_6378
1.46545	6.31737	2.20341	0.137719	0.572615	cobB	MSMEG_2617
-2.24332	4.4376	2.20337	0.137722	0.572615	MSMEG_3350	MSMEG_3350
-2.24332	4.4376	2.20337	0.137722	0.572615	MSMEG_6690	MSMEG_6690
-1.65441	5.80654	2.20114	0.137922	0.57296	MSMEG_0318	MSMEG_0318
-1.40235	6.10603	2.19927	0.138089	0.573168	MSMEG_6085	MSMEG_6085
1.08315	7.54363	2.1957	0.13841	0.573861	MSMEG_4039	MSMEG_4039
0.702946	9.39931	2.1948	0.13849	0.573861	MSMEG_5549	MSMEG_5549
-2.3118	4.66608	2.19241	0.138705	0.574093	groEL	MSMEG_1978
-0.616438	10.816	2.18843	0.139064	0.574093	gltA	MSMEG_5672
1.26419	6.6788	2.18768	0.139132	0.574093	MSMEG_4280	MSMEG_4280
-1.99461	4.64267	2.18753	0.139145	0.574093	MSMEG_0090	MSMEG_0090
1.07721	7.59257	2.1838	0.139483	0.574093	MSMEG_6907	MSMEG_6907
-0.977177	8.06836	2.1835	0.13951	0.574093	MSMEG_5242	MSMEG_5242
1.46728	6.3066	2.18157	0.139684	0.574093	MSMEG_6839	MSMEG_6839
-1.8782	5.41208	2.18157	0.139685	0.574093	MSMEG_3330	MSMEG_3330
3.37088	5.40269	2.18109	0.139728	0.574093	MSMEG_3366	MSMEG_3366
-1.11128	6.79789	2.17792	0.140016	0.574093	MSMEG_2595	MSMEG_2595
2.22817	5.13469	2.1761	0.140182	0.574093	MSMEG_2546	MSMEG_2546
2.25507	5.24038	2.17536	0.140249	0.574093	MSMEG_5786	MSMEG_5786
-1.32033	6.43765	2.17442	0.140335	0.574093	MSMEG_1165	MSMEG_1165
-2.21788	4.42583	2.17292	0.140472	0.574093	MSMEG_4986	MSMEG_4986
-2.21788	4.42583	2.17292	0.140472	0.574093	MSMEG_5669	MSMEG_5669
3.20123	4.61942	2.17243	0.140517	0.574093	MSMEG_0626	MSMEG_0626
3.20034	4.61825	2.17221	0.140537	0.574093	MSMEG_1391	MSMEG_1391
0.73485	9.19371	2.17037	0.140705	0.574258	MSMEG_6082	MSMEG_6082
1.65932	6.11059	2.16921	0.140811	0.574258	MSMEG_3656	MSMEG_3656
3.23286	4.72893	2.16646	0.141064	0.574808	MSMEG_3425	MSMEG_3425
2.24997	5.23466	2.1602	0.141639	0.575555	rpmG	MSMEG_1339
-0.808408	8.75785	2.1579	0.141851	0.575555	MSMEG_5697	MSMEG_5697
3.18693	4.61329	2.15636	0.141993	0.575555	MSMEG_2978	MSMEG_2978
3.1861	4.61212	2.15621	0.142008	0.575555	MSMEG_0667	MSMEG_0667
-1.73143	5.04989	2.15142	0.142451	0.575555	MSMEG_0127	MSMEG_0127
2.25233	5.20608	2.1508	0.142508	0.575555	MSMEG_3041	MSMEG_3041
3.21402	4.72071	2.14658	0.142901	0.575555	MSMEG_1237	MSMEG_1237
1.82778	5.85087	2.14272	0.143261	0.575555	MSMEG_5284	MSMEG_5284
2.0094	5.61043	2.14109	0.143412	0.575555	MSMEG_0886	MSMEG_0886
3.17287	4.60715	2.14071	0.143448	0.575555	MSMEG_0998	MSMEG_0998
3.17209	4.60598	2.14062	0.143457	0.575555	MSMEG_5850	MSMEG_5850
3.21524	4.73842	2.14025	0.143491	0.575555	MSMEG_2590	MSMEG_2590
0.611413	10.8466	2.13986	0.143528	0.575555	MSMEG_0401	MSMEG_0401
-0.79571	8.82722	2.13931	0.14358	0.575555	MSMEG_1424	MSMEG_1424
-0.613973	10.5086	2.13857	0.143648	0.575555	MSMEG_5244	MSMEG_5244
-1.06198	7.36226	2.13725	0.143772	0.575555	MSMEG_6815	MSMEG_6815
2.22485	5.1238	2.1362	0.14387	0.575555	MSMEG_0042	MSMEG_0042
-1.69597	4.91691	2.13608	0.143882	0.575555	MSMEG_3828	MSMEG_3828
-1.82623	5.03707	2.13362	0.144113	0.575555	MSMEG_0048	MSMEG_0048
-0.614111	11.5381	2.13271	0.144198	0.575555	MSMEG_4263	MSMEG_4263
3.1712	4.62211	2.1327	0.144199	0.575555	MSMEG_2493	MSMEG_2493
1.46845	6.28189	2.1316	0.144303	0.575555	MSMEG_4705	MSMEG_4705
1.82765	5.83712	2.13156	0.144306	0.575555	MSMEG_1609	MSMEG_1609
-1.00048	7.22324	2.12997	0.144456	0.575555	MSMEG_6208	MSMEG_6208
3.19933	4.716	2.12914	0.144534	0.575555	MSMEG_3361	MSMEG_3361
3.19933	4.716	2.12914	0.144534	0.575555	MSMEG_5996	MSMEG_5996
3.19933	4.716	2.12914	0.144534	0.575555	MSMEG_6263	MSMEG_6263
3.19933	4.716	2.12914	0.144534	0.575555	MSMEG_6845	MSMEG_6845
3.15831	4.59983	2.12544	0.144884	0.575851	MSMEG_5908	MSMEG_5908
1.31994	6.53176	2.12494	0.144931	0.575851	hup	MSMEG_2389
0.668011	10.2771	2.12462	0.144961	0.575851	MSMEG_6081	MSMEG_6081
1.84782	5.72264	2.12263	0.14515	0.576134	MSMEG_5902	MSMEG_5902
1.97346	5.72371	2.12066	0.145336	0.576221	MSMEG_5822	MSMEG_5822
-1.33758	6.34763	2.11992	0.145407	0.576221	MSMEG_3715	MSMEG_3715
-1.05061	7.00414	2.11476	0.145898	0.577428	nadA	MSMEG_3199
-1.23083	6.42432	2.11294	0.146072	0.577428	MSMEG_4511	MSMEG_4511
-1.65811	5.21335	2.11231	0.146132	0.577428	ehuD	MSMEG_5370
0.858475	8.62767	2.11177	0.146183	0.577428	MSMEG_4128	MSMEG_4128
1.17256	6.7137	2.10742	0.146599	0.578606	MSMEG_0046	MSMEG_0046
2.19578	5.1168	2.10398	0.146929	0.579441	MSMEG_3851	MSMEG_3851
0.699338	9.40076	2.09863	0.147444	0.580288	MSMEG_1252	MSMEG_1252
1.31053	6.4849	2.0985	0.147457	0.580288	MSMEG_4934	MSMEG_4934
1.24083	6.60934	2.09635	0.147664	0.580288	MSMEG_2648	MSMEG_2648
0.960822	8.09636	2.09585	0.147712	0.580288	MSMEG_6193	MSMEG_6193
3.23304	4.90962	2.09561	0.147735	0.580288	MSMEG_2004	MSMEG_2004
1.37174	6.38804	2.09408	0.147884	0.580405	MSMEG_6390	MSMEG_6390
1.84292	5.66877	2.09097	0.148185	0.581122	MSMEG_4354	MSMEG_4354
1.08988	7.07974	2.0835	0.148911	0.583503	MSMEG_6543	MSMEG_6543
2.26291	5.45696	2.07823	0.149426	0.584974	MSMEG_6147	MSMEG_6147
1.92861	5.87847	2.07722	0.149525	0.584974	MSMEG_1065	MSMEG_1065
-1.56292	5.79032	2.07543	0.1497	0.585192	MSMEG_5405	MSMEG_5405
-0.78412	8.83195	2.07313	0.149926	0.585608	MSMEG_1255	MSMEG_1255
1.05224	7.1999	2.07013	0.150222	0.586295	MSMEG_4483	MSMEG_4483
-1.73701	4.92059	2.06711	0.150519	0.586603	MSMEG_3467	MSMEG_3467
0.966446	8.01193	2.0669	0.15054	0.586603	MSMEG_0031	MSMEG_0031
1.10811	7.23654	2.06464	0.150764	0.587008	MSMEG_3682	MSMEG_3682
-1.51506	5.94152	2.06263	0.150962	0.587314	hisB	MSMEG_3207
1.03471	7.36933	2.05731	0.15149	0.588438	MSMEG_5709	MSMEG_5709
2.1884	5.18539	2.05613	0.151607	0.588438	MSMEG_4352	MSMEG_4352
-2.0907	5.11412	2.05609	0.151611	0.588438	MSMEG_1114	MSMEG_1114
1.42763	6.30125	2.04855	0.152364	0.590891	mraY	MSMEG_4230
-1.18973	6.67713	2.04296	0.152925	0.592017	MSMEG_4090	MSMEG_4090
2.1805	5.18214	2.04219	0.153002	0.592017	MSMEG_2800	MSMEG_2800
2.21233	5.34177	2.04205	0.153016	0.592017	MSMEG_0966	MSMEG_0966
1.87731	5.94405	2.03885	0.153338	0.592764	MSMEG_6561	MSMEG_6561
-1.65474	5.60193	2.03565	0.153661	0.592764	MSMEG_0756	MSMEG_0756
0.744442	9.00301	2.03511	0.153716	0.592764	purM	MSMEG_5798
0.991763	7.66079	2.03361	0.153867	0.592764	panB	MSMEG_4298
1.40172	6.26622	2.03323	0.153906	0.592764	MSMEG_2348	MSMEG_2348
1.44013	6.34633	2.03167	0.154064	0.592764	MSMEG_1776	MSMEG_1776
-2.14582	4.51165	2.02694	0.154545	0.592764	MSMEG_2210	MSMEG_2210
-2.14582	4.51165	2.02694	0.154545	0.592764	MSMEG_6498	MSMEG_6498
-1.71246	5.27911	2.02624	0.154616	0.592764	MSMEG_3460	MSMEG_3460
1.60321	5.95334	2.02621	0.154618	0.592764	MSMEG_0361	MSMEG_0361
0.862694	8.46954	2.02572	0.154668	0.592764	MSMEG_6288	MSMEG_6288
-1.00776	7.06875	2.02498	0.154744	0.592764	MSMEG_5041	MSMEG_5041
2.17503	5.17804	2.02461	0.154781	0.592764	MSMEG_4619	MSMEG_4619
1.10099	6.94665	2.02317	0.154928	0.592829	manB	MSMEG_1834
0.937994	8.17618	2.02207	0.15504	0.592829	thiD	MSMEG_0825
-0.595356	10.6291	2.02035	0.155216	0.592865	MSMEG_1821	MSMEG_1821
1.56316	6.04846	2.01631	0.15563	0.592865	MSMEG_0404	MSMEG_0404
1.55981	6.05106	2.01588	0.155674	0.592865	MSMEG_3500	MSMEG_3500
1.13177	6.90436	2.01515	0.155748	0.592865	MSMEG_2592	MSMEG_2592
1.08124	6.97143	2.01485	0.155779	0.592865	MSMEG_2779	MSMEG_2779
-1.02967	7.30441	2.01414	0.155853	0.592865	MSMEG_5501	MSMEG_5501
1.95117	5.56146	2.01186	0.156086	0.592865	MSMEG_1806	MSMEG_1806
1.09112	6.87338	2.01078	0.156198	0.592865	pheS	MSMEG_3778
1.04578	7.21121	2.00992	0.156286	0.592865	MSMEG_2349	MSMEG_2349
1.26028	6.47486	2.00967	0.156312	0.592865	MSMEG_0140	MSMEG_0140
1.94471	5.5219	2.00752	0.156534	0.592865	MSMEG_0355	MSMEG_0355
0.986211	7.59612	2.00707	0.15658	0.592865	MSMEG_4915	MSMEG_4915
-0.593041	10.5974	2.00507	0.156787	0.592865	MSMEG_1350	MSMEG_1350
0.592569	10.7963	2.00379	0.156919	0.592865	MSMEG_1248	MSMEG_1248
2.17315	5.19099	2.00354	0.156946	0.592865	nagA	MSMEG_2119
1.42927	6.33986	2.00316	0.156985	0.592865	MSMEG_3198	MSMEG_3198
-1.27724	6.24225	1.99699	0.157625	0.594023	MSMEG_5424	MSMEG_5424
0.758511	8.94502	1.99695	0.157629	0.594023	MSMEG_4741	MSMEG_4741
0.59364	10.4591	1.99618	0.157709	0.594023	topA	MSMEG_6157
0.836284	8.58396	1.99554	0.157776	0.594023	MSMEG_6089	MSMEG_6089
1.43408	6.2337	1.99243	0.1581	0.594786	MSMEG_2581	MSMEG_2581
-1.91337	4.71198	1.98879	0.15848	0.595662	MSMEG_3112	MSMEG_3112
1.93542	5.41734	1.98628	0.158743	0.595662	MSMEG_5889	MSMEG_5889
1.93818	5.54046	1.98484	0.158894	0.595662	MSMEG_6595	MSMEG_6595
-0.670141	9.33701	1.98469	0.15891	0.595662	aceE	MSMEG_4323
1.57275	6.0009	1.98428	0.158953	0.595662	MSMEG_5717	MSMEG_5717
1.14978	6.68123	1.98324	0.159062	0.595662	ackA	MSMEG_0784
1.93075	5.51654	1.98005	0.159397	0.596108	MSMEG_2816	MSMEG_2816
0.994537	7.4115	1.97956	0.15945	0.596108	MSMEG_2370	MSMEG_2370
2.13658	5.19132	1.97795	0.159619	0.596108	MSMEG_5610	MSMEG_5610
2.16286	5.26752	1.97749	0.159667	0.596108	MSMEG_3515	MSMEG_3515
-1.72409	5.17663	1.97595	0.159831	0.596139	MSMEG_1977	MSMEG_1977
-1.64582	5.44108	1.97511	0.159919	0.596139	MSMEG_4316	MSMEG_4316
2.16417	5.24211	1.97036	0.160423	0.59754	MSMEG_3905	MSMEG_3905
1.91869	5.60425	1.96926	0.160539	0.59754	MSMEG_2039	MSMEG_2039
0.591521	10.2476	1.96629	0.160854	0.598262	MSMEG_0024	MSMEG_0024
1.35575	6.32428	1.96261	0.161247	0.599266	MSMEG_5124	MSMEG_5124
1.7728	5.73715	1.95749	0.161795	0.600475	MSMEG_0049	MSMEG_0049
2.14745	5.24177	1.95682	0.161866	0.600475	MSMEG_1067	MSMEG_1067
-0.582701	10.7605	1.95207	0.162377	0.600475	MSMEG_1254	MSMEG_1254
2.18184	5.45622	1.95155	0.162432	0.600475	MSMEG_2761	MSMEG_2761
2.12342	5.18336	1.95152	0.162436	0.600475	MSMEG_3998	MSMEG_3998
1.92415	5.46875	1.948	0.162815	0.600475	MSMEG_1531	MSMEG_1531
1.32061	6.38915	1.94773	0.162845	0.600475	MSMEG_6722	MSMEG_6722
0.967365	7.72313	1.94738	0.162882	0.600475	MSMEG_0035	MSMEG_0035
1.56759	5.9733	1.94705	0.162918	0.600475	MSMEG_5437	MSMEG_5437
0.892735	8.2658	1.94447	0.163196	0.600475	tatC	MSMEG_3886
2.14526	5.23461	1.9433	0.163323	0.600475	MSMEG_6553	MSMEG_6553
-1.10354	7.59594	1.94038	0.16364	0.600475	xfp	MSMEG_3611
3.0226	4.48987	1.93977	0.163707	0.600475	MSMEG_3132	MSMEG_3132
3.0226	4.48987	1.93977	0.163707	0.600475	MSMEG_3525	MSMEG_3525
3.0226	4.48987	1.93977	0.163707	0.600475	MSMEG_3540	MSMEG_3540
3.0226	4.48987	1.93977	0.163707	0.600475	MSMEG_5465	MSMEG_5465
3.0226	4.48987	1.93977	0.163707	0.600475	lys1	MSMEG_6311
2.12705	5.15772	1.93583	0.164134	0.600475	MSMEG_0891	MSMEG_0891
1.19604	6.60024	1.93514	0.16421	0.600475	MSMEG_3451	MSMEG_3451
2.10568	5.07688	1.93401	0.164334	0.600475	MSMEG_6572	MSMEG_6572
1.76183	5.7143	1.92836	0.164951	0.600475	MSMEG_1895	MSMEG_1895
3.04377	4.59901	1.92682	0.165119	0.600475	MSMEG_5950	MSMEG_5950
3.0087	4.48217	1.92626	0.165181	0.600475	MSMEG_1544	MSMEG_1544
3.0087	4.48217	1.92626	0.165181	0.600475	MSMEG_2146	MSMEG_2146
3.0087	4.48217	1.92626	0.165181	0.600475	MSMEG_3703	MSMEG_3703
1.89338	5.60164	1.92614	0.165194	0.600475	MSMEG_1926	MSMEG_1926
-1.18126	6.4285	1.92547	0.165267	0.600475	MSMEG_5926	MSMEG_5926
1.60451	5.98336	1.92193	0.165656	0.600475	MSMEG_3088	MSMEG_3088
1.40987	6.22381	1.91955	0.165918	0.600475	MSMEG_1739	MSMEG_1739
1.13743	6.71546	1.91582	0.166331	0.600475	MSMEG_1932	MSMEG_1932
1.17242	6.58466	1.91465	0.166461	0.600475	MSMEG_3281	MSMEG_3281
2.99521	4.47447	1.91329	0.166611	0.600475	MSMEG_0377	MSMEG_0377
2.99521	4.47447	1.91329	0.166611	0.600475	MSMEG_5281	MSMEG_5281
2.99556	4.47564	1.91302	0.166641	0.600475	MSMEG_1595	MSMEG_1595
2.99556	4.47564	1.91302	0.166641	0.600475	MSMEG_3448	MSMEG_3448
2.99556	4.47564	1.91302	0.166641	0.600475	MSMEG_5000	MSMEG_5000
2.99556	4.47564	1.91302	0.166641	0.600475	MSMEG_6857	MSMEG_6857
1.1705	6.71051	1.91169	0.166788	0.600475	MSMEG_5673	MSMEG_5673
2.1336	5.22903	1.91026	0.166947	0.600475	MSMEG_3731	MSMEG_3731
-0.919376	7.87592	1.90948	0.167034	0.600475	MSMEG_5570	MSMEG_5570
1.76985	5.62576	1.90894	0.167094	0.600475	MSMEG_4658	MSMEG_4658
1.89711	5.49778	1.90818	0.167178	0.600475	MSMEG_2935	MSMEG_2935
2.1505	5.33649	1.90799	0.1672	0.600475	MSMEG_6343	MSMEG_6343
0.603735	10.1538	1.90203	0.167864	0.600475	pyc	MSMEG_2412
2.9824	4.46792	1.90052	0.168032	0.600475	MSMEG_2040	MSMEG_2040
2.9824	4.46792	1.90052	0.168032	0.600475	MSMEG_2891	MSMEG_2891
2.9824	4.46792	1.90052	0.168032	0.600475	MSMEG_2997	MSMEG_2997
2.9824	4.46792	1.90052	0.168032	0.600475	MSMEG_5481	MSMEG_5481
2.9824	4.46792	1.90052	0.168032	0.600475	MSMEG_5608	MSMEG_5608
2.9824	4.46792	1.90052	0.168032	0.600475	MSMEG_6479	MSMEG_6479
2.9824	4.46792	1.90052	0.168032	0.600475	MSMEG_0812	MSMEG_0812
1.56605	6.06847	1.90052	0.168033	0.600475	MSMEG_0346	MSMEG_0346
-0.980399	7.11864	1.90024	0.168064	0.600475	MSMEG_0369	MSMEG_0369
0.980407	7.57183	1.89692	0.168436	0.600758	recX	MSMEG_2724
-1.41989	5.95165	1.89567	0.168576	0.600758	MSMEG_1177	MSMEG_1177
3.01208	4.58529	1.89496	0.168656	0.600758	MSMEG_0155	MSMEG_0155
0.61802	9.70093	1.89491	0.168662	0.600758	MSMEG_6105	MSMEG_6105
1.02761	7.14945	1.89375	0.168792	0.600758	MSMEG_6936	MSMEG_6936
2.14836	5.57076	1.89234	0.168951	0.600758	MSMEG_1793	MSMEG_1793
3.05284	4.73122	1.89189	0.169002	0.600758	sthA	MSMEG_2748
2.96989	4.46136	1.88817	0.169421	0.601172	pcaG	MSMEG_2602
1.04426	7.10582	1.88732	0.169517	0.601172	MSMEG_0679	MSMEG_0679
2.10262	5.14684	1.8867	0.169587	0.601172	MSMEG_6830	MSMEG_6830
1.13188	6.89162	1.88651	0.169608	0.601172	amt	MSMEG_2425
1.31618	6.35218	1.88377	0.169919	0.60167	purH	MSMEG_5515
-1.63829	5.0773	1.88236	0.170079	0.60167	MSMEG_5627	MSMEG_5627
-0.735599	8.84383	1.88086	0.170249	0.60167	MSMEG_0028	MSMEG_0028
2.99707	4.579	1.87978	0.170371	0.60167	MSMEG_0104	MSMEG_0104
-1.57381	5.06183	1.8793	0.170426	0.60167	MSMEG_0851	MSMEG_0851
1.71288	5.83208	1.87878	0.170485	0.60167	MSMEG_6096	MSMEG_6096
1.66895	5.95425	1.87734	0.170649	0.601815	MSMEG_6478	MSMEG_6478
1.21827	6.46907	1.8757	0.170836	0.602041	MSMEG_5633	MSMEG_5633
1.02139	7.09236	1.87385	0.171047	0.602118	MSMEG_0244	MSMEG_0244
1.45642	6.18469	1.87293	0.171152	0.602118	MSMEG_5266	MSMEG_5266
2.0848	5.15921	1.86998	0.17149	0.602118	MSMEG_3705	MSMEG_3705
1.87689	5.48827	1.86776	0.171745	0.602118	MSMEG_5866	MSMEG_5866
1.55067	6.08224	1.86694	0.171838	0.602118	MSMEG_4299	MSMEG_4299
-1.03702	6.72121	1.86544	0.172011	0.602118	ribE	MSMEG_3071
2.98115	4.57033	1.86521	0.172038	0.602118	MSMEG_5217	MSMEG_5217
1.8743	5.38754	1.86448	0.172121	0.602118	MSMEG_1517	MSMEG_1517
-0.941767	7.66858	1.86387	0.172192	0.602118	MSMEG_1422	MSMEG_1422
1.72462	5.74847	1.86274	0.172321	0.602118	MSMEG_6559	MSMEG_6559
1.23293	6.42391	1.86241	0.172359	0.602118	dcd	MSMEG_0678
2.05574	5.05828	1.86206	0.1724	0.602118	cobG	MSMEG_3871
-0.937374	7.68775	1.86067	0.17256	0.602118	MSMEG_1265	MSMEG_1265
2.06011	5.05897	1.86052	0.172578	0.602118	MSMEG_0055	MSMEG_0055
2.11308	5.2904	1.85638	0.173056	0.603063	MSMEG_6922	MSMEG_6922
1.18511	7.03826	1.85604	0.173095	0.603063	MSMEG_2982	MSMEG_2982
-1.1954	6.27405	1.85383	0.173351	0.603527	MSMEG_0917	MSMEG_0917
0.780103	8.77265	1.85109	0.173669	0.604047	MSMEG_2416	MSMEG_2416
1.86613	5.4865	1.85008	0.173786	0.604047	MSMEG_4855	MSMEG_4855
1.87054	5.46761	1.84936	0.17387	0.604047	MSMEG_6379	MSMEG_6379
1.74645	5.6066	1.84653	0.1742	0.604765	MSMEG_6789	MSMEG_6789
1.48144	6.0769	1.84311	0.174599	0.605721	MSMEG_2766	MSMEG_2766
1.63608	6.02387	1.84203	0.174726	0.605732	MSMEG_5128	MSMEG_5128
-1.61272	5.50423	1.83917	0.175061	0.606464	MSMEG_0476	MSMEG_0476
2.95274	4.55768	1.83722	0.17529	0.60683	MSMEG_5909	MSMEG_5909
2.98112	4.6711	1.83147	0.175967	0.608202	MSMEG_6931	MSMEG_6931
2.95201	4.57385	1.83112	0.176008	0.608202	MSMEG_5282	MSMEG_5282
-1.603	4.86401	1.83069	0.176058	0.608202	MSMEG_3517	MSMEG_3517
3.02057	4.81502	1.82822	0.176351	0.608539	MSMEG_1912	MSMEG_1912
0.802446	8.52801	1.82776	0.176404	0.608539	MSMEG_5518	MSMEG_5518
1.60394	5.86617	1.82621	0.176588	0.608746	MSMEG_5272	MSMEG_5272
1.04872	6.94937	1.82318	0.176947	0.60913	MSMEG_1927	MSMEG_1927
0.971205	7.69615	1.82317	0.176948	0.60913	MSMEG_5487	MSMEG_5487
1.66434	5.89954	1.81206	0.178274	0.613264	MSMEG_5783	MSMEG_5783
-1.66729	4.78346	1.80841	0.178712	0.614079	MSMEG_2501	MSMEG_2501
1.18599	6.49849	1.80601	0.179	0.614079	MSMEG_6926	MSMEG_6926
2.09799	5.33283	1.80571	0.179036	0.614079	ssuD	MSMEG_4590
-1.10336	6.60656	1.80503	0.179118	0.614079	MSMEG_1929	MSMEG_1929
0.562071	10.5969	1.8048	0.179145	0.614079	glpK	MSMEG_6759
0.945909	7.71959	1.80281	0.179386	0.614079	MSMEG_6406	MSMEG_6406
1.18464	6.55396	1.80279	0.179388	0.614079	MSMEG_6058	MSMEG_6058
2.01668	5.04247	1.80018	0.179703	0.614244	MSMEG_4509	MSMEG_4509
1.84297	5.63833	1.80003	0.179721	0.614244	MSMEG_5566	MSMEG_5566
2.05249	5.19651	1.79928	0.179812	0.614244	MSMEG_6790	MSMEG_6790
1.47861	6.04537	1.79781	0.17999	0.614422	MSMEG_6481	MSMEG_6481
-1.61264	5.26876	1.79448	0.180393	0.614484	MSMEG_0492	MSMEG_0492
2.94757	4.67424	1.7938	0.180477	0.614484	MSMEG_4408	MSMEG_4408
1.63911	5.93482	1.79265	0.180616	0.614484	MSMEG_6524	MSMEG_6524
1.22579	6.38222	1.79248	0.180636	0.614484	MSMEG_6198	MSMEG_6198
1.6893	5.78764	1.79149	0.180757	0.614484	MSMEG_2900	MSMEG_2900
-1.47942	5.70145	1.79147	0.18076	0.614484	MSMEG_0885	MSMEG_0885
1.38295	6.17821	1.78741	0.181254	0.615342	MSMEG_1823	MSMEG_1823
2.05281	5.23796	1.78733	0.181264	0.615342	MSMEG_0407	MSMEG_0407
1.01657	7.05096	1.78604	0.181422	0.615425	MSMEG_6137	MSMEG_6137
0.960102	7.32193	1.78508	0.181539	0.615425	MSMEG_3139	MSMEG_3139
1.71545	5.59545	1.78335	0.181751	0.615719	bluB	MSMEG_6053
2.07621	5.76518	1.78078	0.182066	0.616358	MSMEG_0484	MSMEG_0484
-1.09639	6.67542	1.77594	0.182661	0.617947	MSMEG_2345	MSMEG_2345
1.8194	5.70168	1.77352	0.182959	0.618529	MSMEG_4469	MSMEG_4469
0.600126	9.63374	1.7684	0.183592	0.620241	dnaA	MSMEG_6947
-0.880554	7.73871	1.76642	0.183839	0.620645	MSMEG_3279	MSMEG_3279
1.63627	5.90274	1.76501	0.184013	0.620653	MSMEG_5527	MSMEG_5527
1.4404	6.11277	1.76385	0.184158	0.620653	MSMEG_3120	MSMEG_3120
1.00913	6.88821	1.76334	0.184221	0.620653	asnB	MSMEG_4269
0.973372	7.34639	1.7618	0.184413	0.620818	MSMEG_0646	MSMEG_0646
1.99156	5.03223	1.76091	0.184523	0.620818	MSMEG_5519	MSMEG_5519
1.41707	6.15624	1.75934	0.18472	0.621053	MSMEG_6250	MSMEG_6250
0.748548	8.76113	1.75554	0.185194	0.622216	cheR	MSMEG_5553
0.737646	8.78711	1.75454	0.185319	0.622216	MSMEG_4528	MSMEG_4528
2.00632	5.11181	1.74969	0.185928	0.623834	MSMEG_0326	MSMEG_0326
1.81689	5.45544	1.74637	0.186346	0.624618	MSMEG_3876	MSMEG_3876
-1.73704	4.63123	1.74367	0.186687	0.624618	MSMEG_6622	MSMEG_6622
-1.75602	4.68146	1.74358	0.186698	0.624618	fadD	MSMEG_6013
0.775018	8.58575	1.74306	0.186764	0.624618	MSMEG_5660	MSMEG_5660
-1.66212	4.85	1.74278	0.186799	0.624618	MSMEG_6859	MSMEG_6859
-1.32933	6.00496	1.73885	0.187297	0.625857	MSMEG_1961	MSMEG_1961
1.69276	5.58556	1.73598	0.187661	0.626644	MSMEG_5728	MSMEG_5728
-0.586614	9.68998	1.73219	0.188144	0.627621	MSMEG_6159	MSMEG_6159
1.37422	6.15645	1.73145	0.188239	0.627621	MSMEG_3050	MSMEG_3050
-1.74183	4.65571	1.73067	0.188338	0.627621	MSMEG_0170	MSMEG_0170
2.03348	5.28131	1.72895	0.188558	0.627928	MSMEG_2140	MSMEG_2140
1.59317	5.75037	1.72673	0.188842	0.628447	MSMEG_0417	MSMEG_0417
-0.901395	7.77381	1.71994	0.189713	0.630919	MSMEG_0383	MSMEG_0383
1.81223	5.47811	1.71851	0.189897	0.630985	MSMEG_4962	MSMEG_4962
-0.936338	7.02566	1.71778	0.189991	0.630985	trx	MSMEG_6934
1.9881	5.11766	1.71458	0.190404	0.631351	MSMEG_5712	MSMEG_5712
0.798846	8.58317	1.71308	0.190598	0.631351	efp	MSMEG_3035
1.66329	5.7131	1.71192	0.190749	0.631351	MSMEG_2466	MSMEG_2466
-1.3483	5.90696	1.7099	0.191011	0.631351	MSMEG_5350	MSMEG_5350
1.44116	6.0538	1.70933	0.191084	0.631351	MSMEG_3674	MSMEG_3674
-0.598902	9.59721	1.70869	0.191168	0.631351	MSMEG_0387	MSMEG_0387
0.88829	7.8659	1.70837	0.191209	0.631351	MSMEG_0059	MSMEG_0059
1.79386	5.60046	1.70807	0.191248	0.631351	MSMEG_6038	MSMEG_6038
1.37045	6.18827	1.70732	0.191345	0.631351	MSMEG_6763	MSMEG_6763
-0.892953	7.45706	1.70699	0.191389	0.631351	MSMEG_3514	MSMEG_3514
1.42437	6.07321	1.70534	0.191603	0.631633	MSMEG_3741	MSMEG_3741
1.67533	5.62887	1.7027	0.191948	0.63193	MSMEG_5475	MSMEG_5475
1.02376	6.7298	1.70267	0.191951	0.63193	MSMEG_6173	MSMEG_6173
1.11506	6.79272	1.70061	0.192221	0.632394	dacB	MSMEG_6113
-1.62062	5.75636	1.69761	0.192613	0.63282	cydD	MSMEG_3231
-0.923265	7.77125	1.69631	0.192783	0.63282	MSMEG_5496	MSMEG_5496
-0.939119	6.92998	1.69478	0.192985	0.63282	MSMEG_1861	MSMEG_1861
1.44037	6.03802	1.69469	0.192996	0.63282	MSMEG_2357	MSMEG_2357
1.66535	5.65663	1.69469	0.192996	0.63282	MSMEG_1856	MSMEG_1856
-0.893649	7.38257	1.69237	0.193301	0.633396	MSMEG_3331	MSMEG_3331
1.61085	5.9007	1.69136	0.193433	0.633407	MSMEG_2771	MSMEG_2771
-0.971854	6.83468	1.68889	0.19376	0.634052	MSMEG_3434	MSMEG_3434
1.39048	6.1559	1.68386	0.194425	0.635804	MSMEG_3026	MSMEG_3026
-0.754831	8.63994	1.68283	0.194561	0.635826	MSMEG_0070	MSMEG_0070
-1.28514	6.19116	1.67816	0.195182	0.63743	MSMEG_1225	MSMEG_1225
0.846868	8.18323	1.67352	0.1958	0.638978	MSMEG_3155	MSMEG_3155
1.57828	5.99525	1.67265	0.195917	0.638978	MSMEG_0290	MSMEG_0290
1.94589	5.01287	1.66931	0.196363	0.639622	MSMEG_6338	MSMEG_6338
-1.39018	5.69514	1.66922	0.196375	0.639622	MSMEG_0967	MSMEG_0967
0.929709	7.55073	1.66794	0.196547	0.639758	MSMEG_4270	MSMEG_4270
1.7816	5.41937	1.66603	0.196803	0.640005	MSMEG_0681	MSMEG_0681
-0.554043	12.4585	1.66543	0.196884	0.640005	MSMEG_0381	MSMEG_0381
-1.56358	4.71733	1.66359	0.197132	0.640384	MSMEG_3340	MSMEG_3340
-1.56261	4.7185	1.66052	0.197545	0.640961	MSMEG_3930	MSMEG_3930
-0.909441	7.50368	1.65955	0.197676	0.640961	MSMEG_3416	MSMEG_3416
1.77247	5.55568	1.6592	0.197723	0.640961	MSMEG_3146	MSMEG_3146
0.981129	6.87204	1.65839	0.197832	0.640961	msrB	MSMEG_2784
1.33247	6.29288	1.65427	0.198391	0.642348	MSMEG_0862	MSMEG_0862
1.51388	5.9098	1.6512	0.198807	0.642874	MSMEG_2198	MSMEG_2198
-1.08755	6.44217	1.65104	0.19883	0.642874	MSMEG_6489	MSMEG_6489
-0.534711	10.7543	1.65018	0.198947	0.642874	MSMEG_1930	MSMEG_1930
1.13383	6.45965	1.64858	0.199164	0.64315	MSMEG_4536	MSMEG_4536
1.43459	5.99122	1.6452	0.199626	0.644202	MSMEG_1882	MSMEG_1882
2.78269	4.42369	1.64427	0.199752	0.644202	MSMEG_4359	MSMEG_4359
-1.48378	5.11699	1.64257	0.199986	0.64453	MSMEG_6874	MSMEG_6874
-1.13543	6.31434	1.64109	0.200188	0.644561	MSMEG_0972	MSMEG_0972
-0.880256	7.18775	1.64058	0.200258	0.644561	MSMEG_3266	MSMEG_3266
0.879111	7.72872	1.63757	0.200671	0.645467	hemH	MSMEG_3152
-0.602674	9.37892	1.63577	0.20092	0.645841	MSMEG_5899	MSMEG_5899
1.1084	6.62387	1.63369	0.201205	0.646336	MSMEG_6138	MSMEG_6138
1.73744	5.7067	1.63224	0.201406	0.646556	bioB	MSMEG_3194
0.93979	7.00953	1.62819	0.201965	0.647928	thrB	MSMEG_4955
0.816704	8.30999	1.62667	0.202177	0.648182	ilvD	MSMEG_0229
1.63912	5.61011	1.62366	0.202595	0.64908	thiG	MSMEG_0793
1.91396	5.00023	1.62162	0.202878	0.64908	MSMEG_4697	MSMEG_4697
-0.601012	9.43737	1.62012	0.203087	0.64908	MSMEG_4059	MSMEG_4059
1.47389	5.991	1.61998	0.203107	0.64908	pqqB	MSMEG_3724
1.58313	5.80913	1.61989	0.203119	0.64908	MSMEG_2359	MSMEG_2359
-1.22372	6.11181	1.61416	0.203921	0.651217	MSMEG_1986	MSMEG_1986
-1.48012	5.0252	1.61008	0.204493	0.652451	MSMEG_6433	MSMEG_6433
0.601042	9.40955	1.60878	0.204676	0.652451	alaS	MSMEG_3025
-0.588921	9.5424	1.60856	0.204706	0.652451	MSMEG_1788	MSMEG_1788
0.537449	10.2566	1.60367	0.205396	0.654223	MSMEG_0410	MSMEG_0410
-1.66618	4.65865	1.6026	0.205548	0.654282	MSMEG_6243	MSMEG_6243
-1.64734	5.05025	1.60158	0.205692	0.654317	MSMEG_4077	MSMEG_4077
1.93526	5.08211	1.60053	0.20584	0.654362	MSMEG_6523	MSMEG_6523
-0.530792	10.7479	1.5994	0.206001	0.65445	sucB	MSMEG_4283
0.776786	8.42006	1.59779	0.206228	0.654748	MSMEG_2593	MSMEG_2593
-1.754	6.12242	1.59656	0.206404	0.654881	MSMEG_3384	MSMEG_3384
-1.58862	4.87694	1.59532	0.206579	0.654911	MSMEG_4781	MSMEG_4781
-0.887644	7.16162	1.59461	0.20668	0.654911	MSMEG_5956	MSMEG_5956
0.829049	8.17066	1.59146	0.207129	0.655909	MSMEG_4668	MSMEG_4668
1.59056	5.76034	1.5864	0.207853	0.657777	MSMEG_6216	MSMEG_6216
0.888834	7.32963	1.5848	0.208082	0.658077	MSMEG_2745	MSMEG_2745
-0.891198	7.24296	1.58299	0.208342	0.658474	MSMEG_1203	MSMEG_1203
-1.59341	4.91398	1.58012	0.208755	0.659354	MSMEG_0888	MSMEG_0888
-0.818527	8.13085	1.57674	0.209244	0.660022	MSMEG_1848	MSMEG_1848
1.92766	5.07898	1.57624	0.209315	0.660022	MSMEG_4977	MSMEG_4977
1.71907	5.6355	1.57573	0.209388	0.660022	MSMEG_6480	MSMEG_6480
-1.28649	6.05538	1.57476	0.20953	0.660022	MSMEG_3593	MSMEG_3593
1.2585	6.27782	1.57399	0.20964	0.660022	MSMEG_6396	MSMEG_6396
-1.58923	4.94004	1.57063	0.210128	0.661134	MSMEG_2641	MSMEG_2641
-1.63811	4.63802	1.56458	0.211008	0.662058	MSMEG_6003	MSMEG_6003
0.790969	8.3399	1.56325	0.211201	0.662058	MSMEG_0684	MSMEG_0684
2.74787	4.53677	1.56047	0.211608	0.662058	MSMEG_1276	MSMEG_1276
2.71609	4.41421	1.5603	0.211633	0.662058	MSMEG_2849	MSMEG_2849
2.71609	4.41421	1.5603	0.211633	0.662058	MSMEG_5021	MSMEG_5021
2.71609	4.41421	1.5603	0.211633	0.662058	MSMEG_5813	MSMEG_5813
2.71609	4.41421	1.5603	0.211633	0.662058	MSMEG_0864	MSMEG_0864
2.71609	4.41421	1.5603	0.211633	0.662058	MSMEG_0920	MSMEG_0920
1.46187	5.95226	1.55923	0.21179	0.662058	MSMEG_0011	MSMEG_0011
1.25998	6.20615	1.55899	0.211825	0.662058	MSMEG_1717	MSMEG_1717
-0.842278	7.54272	1.55728	0.212076	0.662058	MSMEG_1659	MSMEG_1659
-0.851277	7.07189	1.55718	0.21209	0.662058	lgt	MSMEG_5408
1.95208	5.31588	1.55544	0.212346	0.662058	MSMEG_0729	MSMEG_0729
1.51937	6.00694	1.5542	0.212529	0.662058	MSMEG_5927	MSMEG_5927
0.869979	7.58965	1.55282	0.212731	0.662058	MSMEG_1652	MSMEG_1652
1.9255	5.15068	1.55137	0.212945	0.662058	MSMEG_5003	MSMEG_5003
2.70388	4.40743	1.55017	0.213123	0.662058	MSMEG_0016	MSMEG_0016
2.70388	4.40743	1.55017	0.213123	0.662058	MSMEG_5807	MSMEG_5807
2.70388	4.40743	1.55017	0.213123	0.662058	MSMEG_0877	MSMEG_0877
2.70388	4.40743	1.55017	0.213123	0.662058	MSMEG_0960	MSMEG_0960
1.87873	5.07025	1.54494	0.213896	0.662953	MSMEG_3161	MSMEG_3161
1.8907	5.12014	1.54493	0.213897	0.662953	MSMEG_5920	MSMEG_5920
1.08825	6.58322	1.54443	0.213971	0.662953	MSMEG_0737	MSMEG_0737
0.901073	7.3724	1.54324	0.214149	0.662953	gmk	MSMEG_3051
-1.09226	6.32344	1.54302	0.21418	0.662953	MSMEG_0599	MSMEG_0599
1.17973	6.38572	1.54198	0.214336	0.662953	MSMEG_4243	MSMEG_4243
-1.388	5.90177	1.54168	0.21438	0.662953	MSMEG_3218	MSMEG_3218
-1.54352	4.83532	1.54092	0.214493	0.662953	MSMEG_6695	MSMEG_6695
0.793336	8.29356	1.53822	0.214895	0.662982	MSMEG_3249	MSMEG_3249
0.886169	7.5428	1.53702	0.215074	0.662982	MSMEG_1397	MSMEG_1397
1.34005	6.1243	1.537	0.215077	0.662982	MSMEG_5064	MSMEG_5064
0.985515	6.76078	1.53659	0.215138	0.662982	ppnK	MSMEG_3750
2.71729	4.52138	1.53557	0.21529	0.662982	MSMEG_6735	MSMEG_6735
0.892849	7.11843	1.53541	0.215313	0.662982	MSMEG_5593	MSMEG_5593
0.934369	6.97395	1.53091	0.215988	0.66312	MSMEG_4192	MSMEG_4192
-1.628	4.67226	1.52979	0.216155	0.66312	MSMEG_3559	MSMEG_3559
0.948396	6.84205	1.52782	0.216452	0.66312	MSMEG_3737	MSMEG_3737
1.31002	6.08437	1.5253	0.216832	0.66312	MSMEG_3882	MSMEG_3882
2.70267	4.51366	1.52387	0.217046	0.66312	MSMEG_1250	MSMEG_1250
2.70267	4.51366	1.52387	0.217046	0.66312	MSMEG_5498	MSMEG_5498
-0.876717	7.34854	1.52386	0.217048	0.66312	MSMEG_6145	MSMEG_6145
2.7029	4.51485	1.52354	0.217097	0.66312	MSMEG_2428	MSMEG_2428
2.7029	4.51485	1.52354	0.217097	0.66312	MSMEG_2484	MSMEG_2484
2.7029	4.51485	1.52354	0.217097	0.66312	MSMEG_2494	MSMEG_2494
2.7029	4.51485	1.52354	0.217097	0.66312	MSMEG_3387	MSMEG_3387
2.7029	4.51485	1.52354	0.217097	0.66312	MSMEG_5111	MSMEG_5111
1.54285	5.85223	1.5234	0.217117	0.66312	MSMEG_4120	MSMEG_4120
-1.16078	6.21394	1.52147	0.217409	0.663598	MSMEG_3986	MSMEG_3986
0.831618	7.96372	1.51795	0.217942	0.66481	relA	MSMEG_2965
-1.60274	4.62742	1.51624	0.218201	0.665187	MSMEG_3786	MSMEG_3786
1.39591	6.08087	1.51238	0.218789	0.665952	MSMEG_3497	MSMEG_3497
2.76189	4.7891	1.51225	0.218808	0.665952	MSMEG_5961	MSMEG_5961
2.68884	4.50831	1.51191	0.218859	0.665952	MSMEG_0821	MSMEG_0821
0.910877	6.97161	1.51097	0.219002	0.665973	MSMEG_3637	MSMEG_3637
0.833991	8.0508	1.50582	0.21979	0.667637	MSMEG_2045	MSMEG_2045
-0.656144	8.8981	1.50561	0.219822	0.667637	MSMEG_6439	MSMEG_6439
1.03014	6.81878	1.50404	0.220063	0.667957	senX3	MSMEG_0936
1.87865	5.14437	1.5004	0.220622	0.669112	rpmJ	MSMEG_1520
1.11725	6.40574	1.49978	0.220717	0.669112	MSMEG_3145	MSMEG_3145
-1.63816	4.75347	1.49884	0.220861	0.669136	MSMEG_0475	MSMEG_0475
-1.43857	4.86419	1.49734	0.221093	0.669222	MSMEG_5134	MSMEG_5134
2.67415	4.51675	1.4965	0.221222	0.669222	rhaD	MSMEG_0590
1.86114	5.10537	1.496	0.221299	0.669222	MSMEG_0334	MSMEG_0334
1.68064	5.61499	1.49394	0.221619	0.669477	MSMEG_6267	MSMEG_6267
1.83616	4.96993	1.49288	0.221782	0.669477	MSMEG_5047	MSMEG_5047
1.55325	5.73879	1.49281	0.221793	0.669477	MSMEG_4924	MSMEG_4924
-0.863856	6.95917	1.4907	0.222119	0.670049	recR	MSMEG_6279
-1.62508	5.17134	1.48951	0.222304	0.670192	MSMEG_2299	MSMEG_2299
1.32494	6.22628	1.48596	0.222856	0.670875	MSMEG_1529	MSMEG_1529
1.11992	6.49737	1.48573	0.222893	0.670875	MSMEG_5873	MSMEG_5873
-1.54902	4.95457	1.48542	0.222941	0.670875	MSMEG_0665	MSMEG_0665
0.935761	6.94938	1.48317	0.223291	0.671457	dnaJ	MSMEG_4504
-0.940021	6.66164	1.48054	0.223702	0.671457	rplT	MSMEG_3791
0.861002	7.36844	1.47982	0.223815	0.671457	MSMEG_3768	MSMEG_3768
1.81849	4.9619	1.47973	0.223829	0.671457	MSMEG_3276	MSMEG_3276
0.870149	7.6472	1.47936	0.223886	0.671457	MSMEG_2009	MSMEG_2009
-1.52779	4.89992	1.47891	0.223956	0.671457	upp	MSMEG_3473
1.33854	5.95352	1.47737	0.224198	0.671772	MSMEG_2163	MSMEG_2163
1.4307	5.92018	1.47606	0.224404	0.671979	MSMEG_4744	MSMEG_4744
1.65454	5.29273	1.47483	0.224597	0.672145	MSMEG_4170	MSMEG_4170
-0.994119	6.57248	1.47019	0.225327	0.673633	MSMEG_5316	MSMEG_5316
-1.48714	5.362	1.46993	0.225369	0.673633	MSMEG_5023	MSMEG_5023
1.53224	5.81146	1.46858	0.225582	0.673859	MSMEG_5586	MSMEG_5586
1.55548	5.60293	1.4671	0.225816	0.674147	MSMEG_1894	MSMEG_1894
0.775785	8.32641	1.46488	0.226166	0.674783	MSMEG_4917	MSMEG_4917
0.525548	10.0042	1.46069	0.226832	0.676356	mfd	MSMEG_5423
0.70565	8.60075	1.45945	0.22703	0.676536	MSMEG_5636	MSMEG_5636
1.54331	5.65662	1.45802	0.227257	0.6768	MSMEG_3476	MSMEG_3476
1.1557	6.4714	1.45706	0.227411	0.676847	cobA	MSMEG_2618
1.27179	6.10611	1.45492	0.227752	0.677451	MSMEG_2554	MSMEG_2554
1.19625	6.24086	1.45038	0.228479	0.678312	ligC	MSMEG_6302
2.68214	4.74496	1.45036	0.228483	0.678312	MSMEG_0504	MSMEG_0504
0.682328	8.71579	1.44904	0.228694	0.678312	ispD	MSMEG_6076
0.945293	6.82195	1.44797	0.228865	0.678312	MSMEG_4702	MSMEG_4702
-0.948094	6.65106	1.44664	0.229079	0.678312	MSMEG_4112	MSMEG_4112
1.49109	5.90607	1.44544	0.229273	0.678312	MSMEG_4401	MSMEG_4401
1.07129	6.46952	1.44476	0.229382	0.678312	MSMEG_2094	MSMEG_2094
1.82765	5.0896	1.44329	0.22962	0.678312	MSMEG_1626	MSMEG_1626
-1.54635	4.59645	1.44309	0.229651	0.678312	MSMEG_1693	MSMEG_1693
-1.54635	4.59645	1.44309	0.229651	0.678312	MSMEG_2573	MSMEG_2573
-1.54635	4.59645	1.44309	0.229651	0.678312	MSMEG_0658	MSMEG_0658
-1.60495	5.18975	1.44116	0.229963	0.678312	MSMEG_4126	MSMEG_4126
-1.46067	5.21109	1.4408	0.230022	0.678312	MSMEG_2651	MSMEG_2651
1.81867	5.04336	1.44076	0.230028	0.678312	MSMEG_5038	MSMEG_5038
-1.44477	5.5372	1.43985	0.230175	0.678312	MSMEG_2096	MSMEG_2096
1.84162	5.12064	1.43917	0.230286	0.678312	MSMEG_3308	MSMEG_3308
1.25734	6.13498	1.4385	0.230394	0.678312	MSMEG_2122	MSMEG_2122
0.509606	10.1763	1.43709	0.230622	0.678577	MSMEG_6196	MSMEG_6196
1.63484	5.27982	1.43585	0.230824	0.678763	MSMEG_6023	MSMEG_6023
1.27598	6.17451	1.43332	0.231235	0.679564	MSMEG_0131	MSMEG_0131
1.41318	5.89357	1.42895	0.231948	0.680892	MSMEG_5039	MSMEG_5039
0.972196	6.71342	1.42885	0.231964	0.680892	MSMEG_1722	MSMEG_1722
-1.58425	4.7321	1.4268	0.2323	0.681468	MSMEG_2098	MSMEG_2098
1.42945	5.80873	1.42428	0.232712	0.681969	MSMEG_2544	MSMEG_2544
-1.27701	5.9029	1.42354	0.232834	0.681969	tpiA	MSMEG_6785
-0.49586	10.93	1.42143	0.23318	0.681969	MSMEG_1959	MSMEG_1959
-0.81653	7.35924	1.42109	0.233235	0.681969	MSMEG_6575	MSMEG_6575
1.52883	5.59413	1.41957	0.233486	0.681969	MSMEG_5008	MSMEG_5008
2.66004	4.79932	1.41936	0.23352	0.681969	MSMEG_6687	MSMEG_6687
-1.3565	5.29935	1.41907	0.233568	0.681969	MSMEG_6571	MSMEG_6571
1.31657	6.04571	1.41898	0.233584	0.681969	MSMEG_2092	MSMEG_2092
-0.886764	6.84403	1.41808	0.233732	0.681997	MSMEG_3357	MSMEG_3357
-1.39888	5.42403	1.41664	0.233969	0.682281	MSMEG_4653	MSMEG_4653
-0.807731	7.87597	1.41461	0.234305	0.682855	MSMEG_0111	MSMEG_0111
1.23974	6.14771	1.41305	0.234563	0.683201	MSMEG_4695	MSMEG_4695
-0.574171	9.27044	1.41079	0.234938	0.683483	MSMEG_1809	MSMEG_1809
1.4922	5.81485	1.40967	0.235123	0.683483	MSMEG_3287	MSMEG_3287
-0.923481	6.59678	1.40937	0.235173	0.683483	MSMEG_3663	MSMEG_3663
-0.498015	11.3866	1.4091	0.235217	0.683483	rplK	MSMEG_1346
1.82068	5.1206	1.40805	0.235392	0.683586	MSMEG_4479	MSMEG_4479
1.76614	4.94038	1.40591	0.235749	0.683734	MSMEG_1156	MSMEG_1156
-0.932776	6.70715	1.40566	0.23579	0.683734	MSMEG_3959	MSMEG_3959
0.743885	8.35064	1.40523	0.235862	0.683734	MSMEG_3399	MSMEG_3399
-1.46114	5.42198	1.4041	0.23605	0.683876	MSMEG_5353	MSMEG_5353
1.6276	5.52238	1.40161	0.236465	0.684674	MSMEG_5868	MSMEG_5868
1.63628	5.48996	1.40003	0.236731	0.685038	MSMEG_3809	MSMEG_3809
1.42617	5.79995	1.39899	0.236904	0.685135	MSMEG_3806	MSMEG_3806
0.562623	9.3854	1.39816	0.237044	0.685135	clpP	MSMEG_4672
-1.42701	5.20958	1.3973	0.237188	0.685148	MSMEG_2627	MSMEG_2627
1.63525	5.6402	1.39399	0.237745	0.686351	MSMEG_6143	MSMEG_6143
1.79231	5.02889	1.39209	0.238063	0.686764	MSMEG_6474	MSMEG_6474
2.63762	4.84564	1.39036	0.238357	0.686764	MSMEG_4149	MSMEG_4149
-1.55138	4.71385	1.38887	0.238608	0.686764	MSMEG_2948	MSMEG_2948
-0.790389	7.63113	1.38884	0.238612	0.686764	MSMEG_6909	MSMEG_6909
1.79995	5.11321	1.38831	0.238701	0.686764	MSMEG_1001	MSMEG_1001
0.913151	6.91356	1.38816	0.238728	0.686764	MSMEG_5458	MSMEG_5458
-1.20576	6.01286	1.38714	0.2389	0.686855	MSMEG_0620	MSMEG_0620
0.997295	6.54768	1.38542	0.239191	0.686999	MSMEG_1647	MSMEG_1647
1.81134	5.11018	1.38519	0.23923	0.686999	gcvH	MSMEG_3648
-1.18471	6.1118	1.38371	0.239482	0.68732	MSMEG_5719	MSMEG_5719
1.76471	4.94318	1.37867	0.24034	0.687807	MSMEG_0445	MSMEG_0445
0.816906	7.23212	1.37708	0.24061	0.687807	purT	MSMEG_0766
0.973355	6.72475	1.37681	0.240656	0.687807	MSMEG_5236	MSMEG_5236
-1.59228	4.84475	1.37651	0.240707	0.687807	MSMEG_5151	MSMEG_5151
1.80426	5.1136	1.37639	0.240728	0.687807	MSMEG_2575	MSMEG_2575
-1.5096	4.61009	1.37603	0.24079	0.687807	MSMEG_6637	MSMEG_6637
1.80917	5.12541	1.37592	0.240809	0.687807	MSMEG_1283	MSMEG_1283
-1.50913	4.61127	1.37461	0.241033	0.687807	MSMEG_0328	MSMEG_0328
1.6191	5.4158	1.37416	0.241109	0.687807	MSMEG_4974	MSMEG_4974
1.49113	5.774	1.37196	0.241487	0.687807	murD	MSMEG_4229
-1.3812	5.46359	1.37151	0.241564	0.687807	MSMEG_6577	MSMEG_6577
1.48909	5.71023	1.3715	0.241565	0.687807	MSMEG_4360	MSMEG_4360
0.782407	7.97299	1.37128	0.241603	0.687807	cysS	MSMEG_6074
1.12608	6.42442	1.37063	0.241716	0.687807	MSMEG_4182	MSMEG_4182
0.85921	6.99115	1.36994	0.241833	0.687807	MSMEG_2624	MSMEG_2624
-1.39385	4.94586	1.36957	0.241897	0.687807	MSMEG_3016	MSMEG_3016
1.50366	5.62244	1.36779	0.242203	0.687965	MSMEG_1149	MSMEG_1149
-1.37511	5.31221	1.36762	0.242233	0.687965	MSMEG_2451	MSMEG_2451
1.77833	5.06702	1.36661	0.242407	0.688058	MSMEG_4282	MSMEG_4282
0.582627	9.16409	1.36516	0.242656	0.688198	MSMEG_6242	MSMEG_6242
1.42498	5.95791	1.36387	0.242879	0.688198	MSMEG_2754	MSMEG_2754
-1.63783	5.02862	1.36242	0.243129	0.688198	ctaD	MSMEG_2320
1.45804	5.88508	1.36229	0.243153	0.688198	MSMEG_3126	MSMEG_3126
0.531657	9.59857	1.3616	0.243271	0.688198	leuS	MSMEG_6917
1.76977	5.02046	1.35984	0.243577	0.688198	MSMEG_6558	MSMEG_6558
1.74206	4.93246	1.3595	0.243635	0.688198	MSMEG_5768	MSMEG_5768
1.61432	5.41186	1.35946	0.243642	0.688198	MSMEG_6016	MSMEG_6016
-1.33084	5.49966	1.35902	0.243719	0.688198	MSMEG_5083	MSMEG_5083
1.80736	5.22421	1.35799	0.243897	0.688303	MSMEG_0236	MSMEG_0236
1.77313	5.03757	1.35672	0.244119	0.688363	MSMEG_5809	MSMEG_5809
1.78814	5.12458	1.35626	0.244199	0.688363	MSMEG_2097	MSMEG_2097
1.60741	5.47227	1.35371	0.244642	0.688454	MSMEG_2205	MSMEG_2205
0.845206	7.15629	1.3532	0.244731	0.688454	MSMEG_2932	MSMEG_2932
-0.681397	8.78286	1.35292	0.244779	0.688454	hybC	MSMEG_2263
1.60879	5.56391	1.35276	0.244808	0.688454	MSMEG_4971	MSMEG_4971
-0.554345	9.27993	1.35204	0.244934	0.688454	MSMEG_1423	MSMEG_1423
1.6097	5.46567	1.34876	0.245507	0.689057	MSMEG_3430	MSMEG_3430
-1.71284	4.52912	1.3481	0.245622	0.689057	MSMEG_4025	MSMEG_4025
-1.71284	4.52912	1.3481	0.245622	0.689057	MSMEG_6801	MSMEG_6801
-1.77019	4.42886	1.3476	0.24571	0.689057	MSMEG_1956	MSMEG_1956
-1.28569	5.81546	1.34592	0.246004	0.689486	mscL	MSMEG_5482
1.48407	5.67699	1.345	0.246165	0.689542	MSMEG_3154	MSMEG_3154
1.82487	5.29049	1.34375	0.246386	0.689767	MSMEG_6916	MSMEG_6916
0.846715	7.36889	1.3419	0.246711	0.690091	MSMEG_2974	MSMEG_2974
1.35426	5.92211	1.34113	0.246845	0.690091	MSMEG_1360	MSMEG_1360
0.868855	6.96609	1.34069	0.246924	0.690091	MSMEG_6010	MSMEG_6010
1.13823	6.26834	1.33844	0.247321	0.690415	arcA	MSMEG_5448
1.13597	6.34805	1.33844	0.247321	0.690415	ftsY	MSMEG_2424
1.72495	4.92538	1.33669	0.247631	0.690885	MSMEG_2910	MSMEG_2910
0.669555	8.61916	1.33477	0.24797	0.691438	MSMEG_2611	MSMEG_2611
-1.27649	5.78736	1.33269	0.248338	0.692004	MSMEG_3628	MSMEG_3628
0.802741	7.53884	1.33139	0.248569	0.692004	MSMEG_4560	MSMEG_4560
1.75763	5.01716	1.33124	0.248596	0.692004	MSMEG_0023	MSMEG_0023
1.75387	5.05583	1.32526	0.249662	0.694093	MSMEG_6217	MSMEG_6217
-1.4271	4.89889	1.32432	0.249829	0.694093	MSMEG_4773	MSMEG_4773
1.46932	5.69367	1.32381	0.24992	0.694093	MSMEG_1917	MSMEG_1917
1.5972	5.51997	1.3235	0.249976	0.694093	MSMEG_5931	MSMEG_5931
0.595859	9.04972	1.32255	0.250147	0.694093	trpC	MSMEG_3219
1.57666	5.44093	1.32198	0.250248	0.694093	MSMEG_0882	MSMEG_0882
0.832741	7.19266	1.32061	0.250494	0.694093	ureC	MSMEG_3625
1.05004	6.44985	1.32028	0.250552	0.694093	MSMEG_4913	MSMEG_4913
1.71275	4.92043	1.3199	0.250621	0.694093	MSMEG_3093	MSMEG_3093
1.4052	5.65618	1.31507	0.25149	0.695707	MSMEG_1900	MSMEG_1900
1.24942	6.05671	1.31278	0.251904	0.695707	lon	MSMEG_3582
0.809631	7.58575	1.3126	0.251936	0.695707	MSMEG_6619	MSMEG_6619
0.478615	11.0461	1.31215	0.252016	0.695707	rpsG	MSMEG_1399
-0.773698	7.86885	1.31099	0.252226	0.695707	trx	MSMEG_3138
-0.531434	9.47275	1.31084	0.252254	0.695707	ispG	MSMEG_2580
1.71603	4.92436	1.30999	0.252408	0.695707	MSMEG_6417	MSMEG_6417
1.71603	4.92436	1.30999	0.252408	0.695707	MSMEG_6594	MSMEG_6594
-1.67783	4.5171	1.30958	0.252481	0.695707	MSMEG_1017	MSMEG_1017
1.2024	6.13353	1.30739	0.25288	0.696114	MSMEG_0693	MSMEG_0693
-1.68343	4.5439	1.30418	0.253462	0.696114	MSMEG_1120	MSMEG_1120
0.638425	8.79415	1.30379	0.253534	0.696114	MSMEG_6921	MSMEG_6921
-1.18978	5.87713	1.30358	0.253572	0.696114	MSMEG_6788	MSMEG_6788
0.960684	6.5739	1.30357	0.253573	0.696114	MSMEG_2663	MSMEG_2663
0.831566	7.02595	1.30329	0.253624	0.696114	glmM	MSMEG_1559
-1.37725	5.42573	1.30288	0.253698	0.696114	hisH	MSMEG_3208
-0.697258	8.39563	1.30252	0.253765	0.696114	MSMEG_1679	MSMEG_1679
1.58495	5.47677	1.30012	0.254202	0.696283	MSMEG_3283	MSMEG_3283
1.44578	5.7822	1.29869	0.254463	0.696283	MSMEG_3671	MSMEG_3671
1.23794	6.11135	1.29819	0.254556	0.696283	MSMEG_5250	MSMEG_5250
-1.44815	4.98784	1.29744	0.254693	0.696283	MSMEG_6779	MSMEG_6779
0.779953	7.91576	1.2971	0.254756	0.696283	MSMEG_5104	MSMEG_5104
-1.08046	6.17108	1.29652	0.254861	0.696283	MSMEG_6163	MSMEG_6163
1.56973	5.30909	1.29622	0.254916	0.696283	MSMEG_6630	MSMEG_6630
0.787251	7.88107	1.29596	0.254963	0.696283	MSMEG_2925	MSMEG_2925
-1.29746	5.62076	1.2928	0.255544	0.697213	MSMEG_5395	MSMEG_5395
1.46738	5.4709	1.29216	0.255662	0.697213	MSMEG_3602	MSMEG_3602
-1.19479	5.91494	1.29179	0.25573	0.697213	putP	MSMEG_5303
1.42452	5.83218	1.29099	0.255877	0.697226	MSMEG_4489	MSMEG_4489
-1.35071	4.93632	1.2896	0.256134	0.697504	MSMEG_5158	MSMEG_5158
-0.806617	7.16568	1.28839	0.256356	0.697504	MSMEG_0728	MSMEG_0728
-1.32163	5.44568	1.28798	0.256431	0.697504	MSMEG_0625	MSMEG_0625
-1.29418	5.61944	1.28735	0.256548	0.697504	MSMEG_0014	MSMEG_0014
1.70567	4.99635	1.28502	0.256979	0.698289	sun	MSMEG_3065
0.91173	6.76045	1.28139	0.257651	0.699577	MSMEG_5219	MSMEG_5219
-0.800134	6.92324	1.28045	0.257826	0.699577	MSMEG_5574	MSMEG_5574
-0.548976	9.22475	1.27994	0.25792	0.699577	MSMEG_0107	MSMEG_0107
0.8943	6.88347	1.27939	0.258024	0.699577	radA	MSMEG_6079
-1.11551	6.10476	1.27812	0.258261	0.699792	panD	MSMEG_0021
0.764366	7.89004	1.2767	0.258525	0.699792	MSMEG_6412	MSMEG_6412
1.68608	5.16192	1.27666	0.258532	0.699792	MSMEG_3597	MSMEG_3597
-0.88398	6.7873	1.27433	0.258967	0.700028	MSMEG_2626	MSMEG_2626
1.05842	6.43727	1.27417	0.258996	0.700028	MSMEG_5708	MSMEG_5708
-1.645	4.5052	1.2739	0.259048	0.700028	MSMEG_2066	MSMEG_2066
0.496613	9.81705	1.27114	0.259564	0.700627	purL	MSMEG_5824
-0.597954	8.89152	1.27087	0.259614	0.700627	katG	MSMEG_3461
-0.848535	6.76364	1.27043	0.259698	0.700627	MSMEG_1735	MSMEG_1735
0.925662	6.74618	1.26913	0.25994	0.700895	MSMEG_0347	MSMEG_0347
1.7804	5.34545	1.26668	0.260401	0.701087	MSMEG_4707	MSMEG_4707
1.08747	6.27546	1.26647	0.260441	0.701087	MSMEG_4242	MSMEG_4242
1.54697	5.67962	1.2662	0.260492	0.701087	MSMEG_3157	MSMEG_3157
1.72115	5.09833	1.26529	0.260664	0.701087	MSMEG_5794	MSMEG_5794
0.833457	7.08529	1.26455	0.260802	0.701087	MSMEG_1936	MSMEG_1936
0.986636	6.53534	1.2636	0.260983	0.701087	MSMEG_6395	MSMEG_6395
0.682098	8.49192	1.26344	0.261013	0.701087	phoU	MSMEG_5776
1.54089	5.42156	1.26145	0.261388	0.701367	MSMEG_1666	MSMEG_1666
-0.64285	8.65832	1.26137	0.261403	0.701367	rfbA	MSMEG_0384
1.53452	5.32472	1.259	0.261852	0.701916	panC	MSMEG_6097
-0.474867	10.2957	1.25878	0.261894	0.701916	iscS	MSMEG_1242
0.524013	9.5169	1.25695	0.26224	0.70246	MSMEG_3360	MSMEG_3360
1.78304	5.38166	1.25439	0.262726	0.703377	ligC	MSMEG_6304
1.54701	5.37074	1.25353	0.262889	0.70343	MSMEG_2698	MSMEG_2698
1.55861	5.50972	1.24933	0.263692	0.704842	MSMEG_5836	MSMEG_5836
1.67042	4.90608	1.24926	0.263705	0.704842	MSMEG_5210	MSMEG_5210
1.69541	5.03108	1.24719	0.264101	0.705264	MSMEG_5445	MSMEG_5445
1.00081	6.37198	1.24693	0.26415	0.705264	MSMEG_4313	MSMEG_4313
0.893614	6.8296	1.24566	0.264394	0.705529	MSMEG_5002	MSMEG_5002
-1.18505	5.91471	1.2429	0.264924	0.70558	MSMEG_0466	MSMEG_0466
0.772736	7.77689	1.24276	0.26495	0.70558	MSMEG_0065	MSMEG_0065
0.769572	7.8694	1.24248	0.265005	0.70558	MSMEG_4247	MSMEG_4247
1.32008	5.85691	1.24177	0.265141	0.70558	cmk	MSMEG_3739
1.19508	6.1507	1.24133	0.265226	0.70558	MSMEG_0603	MSMEG_0603
1.34036	5.82936	1.24054	0.265377	0.70558	MSMEG_3359	MSMEG_3359
1.42994	5.6019	1.24032	0.26542	0.70558	MSMEG_4179	MSMEG_4179
0.684292	8.39791	1.23849	0.265773	0.706136	lysS	MSMEG_6094
1.33616	5.84442	1.23729	0.266005	0.706316	MSMEG_2130	MSMEG_2130
1.22175	6.03542	1.23599	0.266257	0.706316	mtaP	MSMEG_0990
1.51214	5.22467	1.23529	0.266392	0.706316	MSMEG_3454	MSMEG_3454
-1.23775	5.66255	1.23386	0.266669	0.706316	MSMEG_1150	MSMEG_1150
1.00787	6.49156	1.23241	0.266949	0.706316	MSMEG_1889	MSMEG_1889
1.51921	5.31505	1.2319	0.267049	0.706316	MSMEG_6297	MSMEG_6297
0.615641	8.81687	1.2308	0.267262	0.706316	MSMEG_6087	MSMEG_6087
-0.772162	7.14496	1.23059	0.267303	0.706316	MSMEG_3144	MSMEG_3144
-1.61497	4.51989	1.23057	0.267307	0.706316	MSMEG_5347	MSMEG_5347
1.22122	6.04775	1.23018	0.267384	0.706316	MSMEG_3612	MSMEG_3612
1.66675	4.90774	1.22996	0.267426	0.706316	MSMEG_0999	MSMEG_0999
0.754128	7.7435	1.22596	0.268204	0.707398	tyrS	MSMEG_3758
-1.42927	5.07475	1.2257	0.268256	0.707398	MSMEG_5993	MSMEG_5993
0.723275	8.14455	1.2249	0.268411	0.707398	pknA	MSMEG_0030
-1.25079	5.67789	1.2249	0.268413	0.707398	MSMEG_4118	MSMEG_4118
1.42944	5.5322	1.22336	0.268714	0.707541	MSMEG_6136	MSMEG_6136
0.596087	8.88007	1.22107	0.269162	0.707541	MSMEG_1341	MSMEG_1341
0.747851	7.9425	1.22064	0.269245	0.707541	ppc	MSMEG_3097
-0.77105	7.01599	1.2206	0.269254	0.707541	MSMEG_5569	MSMEG_5569
-1.59918	4.49265	1.21895	0.269577	0.707541	MSMEG_6826	MSMEG_6826
1.4161	5.6928	1.21875	0.269617	0.707541	MSMEG_0167	MSMEG_0167
-0.591002	8.8885	1.2181	0.269745	0.707541	MSMEG_4044	MSMEG_4044
0.941867	6.56236	1.21805	0.269755	0.707541	MSMEG_3638	MSMEG_3638
1.02912	6.41982	1.21799	0.269766	0.707541	MSMEG_3429	MSMEG_3429
-1.00861	6.27098	1.2161	0.270138	0.708137	MSMEG_0102	MSMEG_0102
1.68196	4.99158	1.2143	0.270492	0.708687	MSMEG_2492	MSMEG_2492
-1.51635	4.9896	1.21331	0.270688	0.708821	MSMEG_4297	MSMEG_4297
1.70258	5.07445	1.21161	0.271023	0.70884	hslR	MSMEG_3455
1.7128	5.15011	1.21124	0.271097	0.70884	MSMEG_3920	MSMEG_3920
1.67548	5.06354	1.21108	0.271129	0.70884	MSMEG_2687	MSMEG_2687
0.985078	6.58671	1.21009	0.271325	0.708973	MSMEG_1261	MSMEG_1261
-0.60143	8.85956	1.20801	0.271737	0.7091	MSMEG_5710	MSMEG_5710
0.768793	7.66354	1.20747	0.271844	0.7091	MSMEG_1920	MSMEG_1920
1.64649	4.97117	1.20711	0.271916	0.7091	MSMEG_1518	MSMEG_1518
0.807116	7.0032	1.20693	0.271952	0.7091	MSMEG_1957	MSMEG_1957
-1.32861	5.23434	1.20463	0.272409	0.709632	MSMEG_6887	MSMEG_6887
1.64769	4.90084	1.20293	0.272748	0.709632	MSMEG_0989	MSMEG_0989
0.711978	8.28169	1.20189	0.272955	0.709632	ssuD	MSMEG_4086
1.63255	4.89095	1.19893	0.273547	0.709632	MSMEG_4825	MSMEG_4825
1.63255	4.89095	1.19893	0.273547	0.709632	MSMEG_5808	MSMEG_5808
-0.919202	6.53815	1.19605	0.274123	0.709632	ctaD	MSMEG_4437
-0.477509	9.82512	1.19493	0.274349	0.709632	orB	MSMEG_4645
0.903103	6.64344	1.19415	0.274504	0.709632	MSMEG_6407	MSMEG_6407
-1.42147	5.15862	1.1938	0.274576	0.709632	MSMEG_0470	MSMEG_0470
1.70854	5.15007	1.19374	0.274587	0.709632	MSMEG_1799	MSMEG_1799
2.40065	4.47673	1.19267	0.274802	0.709632	MSMEG_5379	MSMEG_5379
2.40065	4.47673	1.19267	0.274802	0.709632	MSMEG_6456	MSMEG_6456
1.67673	5.06357	1.19078	0.275182	0.709632	MSMEG_1323	MSMEG_1323
2.40158	4.49309	1.19071	0.275197	0.709632	MSMEG_2674	MSMEG_2674
1.66668	5.06064	1.19071	0.275197	0.709632	MSMEG_0414	MSMEG_0414
2.37068	4.35069	1.19061	0.275218	0.709632	MSMEG_1096	MSMEG_1096
2.37068	4.35069	1.19061	0.275218	0.709632	panE	MSMEG_0153
2.37068	4.35069	1.19061	0.275218	0.709632	MSMEG_2252	MSMEG_2252
2.37068	4.35069	1.19061	0.275218	0.709632	MSMEG_2463	MSMEG_2463
2.37068	4.35069	1.19061	0.275218	0.709632	MSMEG_0432	MSMEG_0432
2.37068	4.35069	1.19061	0.275218	0.709632	MSMEG_0443	MSMEG_0443
-1.12174	5.97984	1.18973	0.275395	0.709632	MSMEG_5583	MSMEG_5583
-1.57051	4.48092	1.18906	0.27553	0.709632	MSMEG_3433	MSMEG_3433
0.677124	8.42476	1.18776	0.275792	0.709632	smpB	MSMEG_2091
1.1847	6.07577	1.18761	0.275822	0.709632	MSMEG_4245	MSMEG_4245
-0.730958	7.29404	1.18641	0.276066	0.709632	MSMEG_3675	MSMEG_3675
-1.26049	5.28913	1.18547	0.276256	0.709632	MSMEG_0508	MSMEG_0508
1.64757	4.97623	1.18337	0.276681	0.709632	MSMEG_2832	MSMEG_2832
1.66119	5.09727	1.17911	0.277547	0.709632	MSMEG_3192	MSMEG_3192
-0.488312	9.64351	1.17805	0.277763	0.709632	MSMEG_4111	MSMEG_4111
-0.453504	11.2987	1.17796	0.277782	0.709632	kgd	MSMEG_5049
1.64088	5.00766	1.1779	0.277795	0.709632	MSMEG_5930	MSMEG_5930
-1.59117	4.59754	1.1778	0.277814	0.709632	MSMEG_0723	MSMEG_0723
-1.19228	5.81941	1.17765	0.277845	0.709632	MSMEG_2517	MSMEG_2517
-0.894076	6.50497	1.17702	0.277974	0.709632	MSMEG_6144	MSMEG_6144
1.0735	6.25603	1.17517	0.278353	0.709632	MSMEG_5065	MSMEG_5065
-1.46479	5.50366	1.17505	0.278377	0.709632	MSMEG_4101	MSMEG_4101
1.65182	4.98066	1.17476	0.278436	0.709632	MSMEG_6027	MSMEG_6027
0.528669	9.24457	1.17408	0.278576	0.709632	MSMEG_6077	MSMEG_6077
2.37175	4.46204	1.17387	0.278617	0.709632	MSMEG_1846	MSMEG_1846
2.37175	4.46204	1.17387	0.278617	0.709632	MSMEG_1975	MSMEG_1975
-0.848382	6.62477	1.17318	0.27876	0.709632	clpS	MSMEG_4910
-0.562884	8.92683	1.16981	0.279451	0.709632	MSMEG_0370	MSMEG_0370
1.6371	4.97241	1.16928	0.279561	0.709632	MSMEG_6050	MSMEG_6050
-1.05576	6.05821	1.16864	0.279692	0.709632	MSMEG_1775	MSMEG_1775
1.27567	5.92263	1.16832	0.279757	0.709632	MSMEG_3402	MSMEG_3402
-1.55533	4.48766	1.16798	0.279826	0.709632	pabB	MSMEG_5446
0.879922	6.70503	1.16773	0.279879	0.709632	MSMEG_0239	MSMEG_0239
-1.14423	5.75362	1.16698	0.280033	0.709632	MSMEG_5492	MSMEG_5492
-1.3229	5.36462	1.16617	0.280201	0.709632	MSMEG_5565	MSMEG_5565
1.48061	5.27713	1.16581	0.280274	0.709632	MSMEG_3239	MSMEG_3239
2.35801	4.45408	1.16528	0.280384	0.709632	MSMEG_6732	MSMEG_6732
2.35801	4.45408	1.16528	0.280384	0.709632	MSMEG_6810	MSMEG_6810
2.3579	4.45528	1.16484	0.280475	0.709632	MSMEG_0509	MSMEG_0509
2.3579	4.45528	1.16484	0.280475	0.709632	MSMEG_6710	MSMEG_6710
1.15602	6.0569	1.16477	0.28049	0.709632	MSMEG_1291	MSMEG_1291
-1.32629	4.84969	1.16463	0.280519	0.709632	MSMEG_3406	MSMEG_3406
1.60521	4.87973	1.16376	0.280697	0.709632	MSMEG_2067	MSMEG_2067
1.60521	4.87973	1.16376	0.280697	0.709632	MSMEG_4174	MSMEG_4174
1.37994	5.69873	1.16213	0.281035	0.709637	MSMEG_1678	MSMEG_1678
1.61371	4.88736	1.15959	0.281562	0.709637	mgtE	MSMEG_6269
-1.57293	4.58725	1.15853	0.281781	0.709637	MSMEG_1219	MSMEG_1219
0.816254	7.02789	1.15786	0.28192	0.709637	MSMEG_3148	MSMEG_3148
-1.25591	5.07667	1.15772	0.281949	0.709637	MSMEG_2503	MSMEG_2503
2.34458	4.4473	1.15661	0.28218	0.709637	MSMEG_3458	MSMEG_3458
0.774858	7.18322	1.15645	0.282213	0.709637	MSMEG_5894	MSMEG_5894
-0.453381	11.703	1.15633	0.282239	0.709637	MSMEG_6427	MSMEG_6427
1.38916	5.55297	1.15483	0.282552	0.709637	MSMEG_2789	MSMEG_2789
-1.29372	5.41613	1.15446	0.282628	0.709637	MSMEG_4567	MSMEG_4567
1.48877	5.56153	1.15433	0.282656	0.709637	MSMEG_5914	MSMEG_5914
2.34399	4.46353	1.15365	0.282797	0.709637	MSMEG_5606	MSMEG_5606
0.928761	6.53771	1.15252	0.283032	0.709637	MSMEG_0080	MSMEG_0080
2.37313	4.60224	1.15248	0.28304	0.709637	MSMEG_2297	MSMEG_2297
2.37313	4.60224	1.15248	0.28304	0.709637	MSMEG_0497	MSMEG_0497
1.12583	6.20986	1.15182	0.28318	0.709637	MSMEG_6655	MSMEG_6655
0.468339	9.8832	1.15126	0.283297	0.709637	fabG	MSMEG_3150
-0.919803	6.41721	1.15068	0.283417	0.709637	MSMEG_5051	MSMEG_5051
1.60845	4.9565	1.14856	0.283861	0.709637	MSMEG_1266	MSMEG_1266
0.500517	9.4873	1.14815	0.283948	0.709637	MSMEG_0225	MSMEG_0225
1.47782	5.3572	1.14763	0.284057	0.709637	MSMEG_2650	MSMEG_2650
1.36527	5.65911	1.14698	0.284194	0.709637	MSMEG_4525	MSMEG_4525
1.27917	5.8714	1.14666	0.28426	0.709637	MSMEG_3456	MSMEG_3456
-1.53994	4.49558	1.1465	0.284294	0.709637	MSMEG_5999	MSMEG_5999
0.453008	10.2653	1.14563	0.284476	0.709637	clpP	MSMEG_4673
0.852478	6.84649	1.14496	0.284617	0.709637	MSMEG_0838	MSMEG_0838
-0.899941	6.42664	1.14449	0.284716	0.709637	MSMEG_2376	MSMEG_2376
0.820751	6.90496	1.14432	0.284752	0.709637	MSMEG_2469	MSMEG_2469
1.17204	6.22475	1.14092	0.285468	0.710687	MSMEG_0970	MSMEG_0970
0.936773	6.4792	1.1406	0.285536	0.710687	MSMEG_0539	MSMEG_0539
1.2799	5.93261	1.13924	0.285824	0.710687	MSMEG_6421	MSMEG_6421
0.743786	7.76218	1.13912	0.285848	0.710687	purK	MSMEG_1819
0.855661	7.00207	1.13858	0.285963	0.710687	MSMEG_1794	MSMEG_1794
2.34062	4.55447	1.13699	0.2863	0.710687	MSMEG_0232	MSMEG_0232
0.535421	9.15807	1.13564	0.286585	0.710687	asd	MSMEG_6256
-1.22033	5.13802	1.13508	0.286705	0.710687	MSMEG_1193	MSMEG_1193
1.10468	6.19222	1.13451	0.286826	0.710687	MSMEG_3688	MSMEG_3688
-0.504723	9.34551	1.13443	0.286844	0.710687	MSMEG_2080	MSMEG_2080
0.624423	8.61044	1.13211	0.287336	0.710687	MSMEG_2579	MSMEG_2579
-1.35512	5.36519	1.13117	0.287536	0.710687	MSMEG_6677	MSMEG_6677
-0.758467	6.8564	1.13035	0.287712	0.710687	MSMEG_5251	MSMEG_5251
-0.950918	6.43675	1.12955	0.287882	0.710687	MSMEG_4058	MSMEG_4058
1.60172	4.95579	1.12824	0.288162	0.710687	MSMEG_5588	MSMEG_5588
1.61814	5.04171	1.12807	0.288198	0.710687	MSMEG_6742	MSMEG_6742
0.997752	6.55024	1.12757	0.288304	0.710687	MSMEG_2445	MSMEG_2445
-1.13444	5.77732	1.12692	0.288443	0.710687	MSMEG_3594	MSMEG_3594
0.865882	6.80093	1.1269	0.288447	0.710687	MSMEG_5725	MSMEG_5725
1.45681	5.26573	1.126	0.28864	0.710687	MSMEG_3801	MSMEG_3801
-0.822277	6.62829	1.1258	0.288682	0.710687	MSMEG_4632	MSMEG_4632
1.46061	5.33406	1.12538	0.288773	0.710687	MSMEG_2645	MSMEG_2645
1.63838	5.12779	1.12536	0.288778	0.710687	MSMEG_6611	MSMEG_6611
-0.789632	7.0329	1.12452	0.288958	0.710687	MSMEG_5109	MSMEG_5109
-1.524	4.5035	1.12451	0.288959	0.710687	rhaI	MSMEG_0589
-1.22372	5.54052	1.1243	0.289005	0.710687	MSMEG_0676	MSMEG_0676
1.16419	5.96063	1.12391	0.289088	0.710687	add	MSMEG_1676
1.65398	5.22468	1.12066	0.289787	0.711818	MSMEG_6177	MSMEG_6177
-0.479303	14.3942	1.11993	0.289944	0.711818	MSMEG_0643	MSMEG_0643
-1.20639	5.80831	1.11963	0.290008	0.711818	MSMEG_5771	MSMEG_5771
0.755346	7.87058	1.11907	0.290129	0.711818	MSMEG_1808	MSMEG_1808
-1.57488	4.71499	1.11624	0.290739	0.712958	MSMEG_0474	MSMEG_0474
[truncated: 2,903 more rows]

## Sheet: Table S3 FDL15_mc2155
logFC	logCPM	F	PValue	FDR	gene	locus_tag
-10.8437	8.87934	83.9586	5.44e-20	6.66e-17	MSMEG_3615	MSMEG_3615
-7.37461	12.3723	146.132	1.51e-33	7.42e-30	MSMEG_1244	MSMEG_1244
-7.08607	5.61715	11.4209	0.000727376	0.0728417	MSMEG_3701	MSMEG_3701
-6.9777	8.25942	43.0607	5.41e-11	3.79e-08	MSMEG_5550	MSMEG_5550
-6.94302	5.40269	10.6735	0.00108833	0.0919825	MSMEG_3366	MSMEG_3366
-6.45491	5.54188	8.64371	0.00328499	0.171309	MSMEG_5473	MSMEG_5473
-6.4193	5.92481	9.2454	0.00236337	0.150457	MSMEG_1546	MSMEG_1546
-6.41493	5.33925	8.8295	0.00296687	0.160228	MSMEG_3319	MSMEG_3319
-6.27059	5.49976	7.89367	0.00496473	0.218123	MSMEG_0460	MSMEG_0460
-6.23275	5.54871	8.0017	0.00467714	0.213884	MSMEG_4385	MSMEG_4385
-6.18404	5.46551	7.40739	0.00650025	0.259046	MSMEG_4799	MSMEG_4799
-6.15921	5.13107	7.98946	0.00470886	0.213884	MSMEG_0265	MSMEG_0265
-6.08065	5.45835	6.8231	0.00900409	0.300131	MSMEG_1190	MSMEG_1190
-6.05394	5.64695	7.10144	0.00770724	0.279858	MSMEG_1189	MSMEG_1189
-6.03668	5.3145	7.37389	0.00662241	0.259046	MSMEG_6054	MSMEG_6054
-5.87645	4.84564	7.07032	0.0078422	0.280602	MSMEG_4149	MSMEG_4149
-5.79719	5.87304	6.69876	0.0096537	0.314292	MSMEG_2459	MSMEG_2459
-5.77827	5.58585	6.40653	0.0113763	0.345301	MSMEG_5362	MSMEG_5362
-5.77667	5.0665	6.42859	0.0112359	0.345301	MSMEG_1314	MSMEG_1314
-5.60796	5.29599	5.39503	0.0202024	0.467132	dapE	MSMEG_5103
-5.5909	5.15725	5.46041	0.0194601	0.4571	MSMEG_0705	MSMEG_0705
-5.54878	4.79932	6.32907	0.0118838	0.353058	MSMEG_6687	MSMEG_6687
-5.54278	4.89492	5.65209	0.0174422	0.436232	MSMEG_4565	MSMEG_4565
-5.54255	6.40545	17.8179	2.44e-05	0.00597949	MSMEG_1940	MSMEG_1940
-5.5362	4.90962	6.10787	0.0134649	0.372908	MSMEG_2004	MSMEG_2004
-5.51831	4.7891	5.74448	0.016548	0.425146	MSMEG_5961	MSMEG_5961
-5.50887	5.96858	5.84252	0.0156507	0.421536	MSMEG_4049	MSMEG_4049
-5.50607	5.9164	5.77202	0.0162907	0.422523	MSMEG_3910	MSMEG_3910
-5.4981	5.70491	5.55862	0.0183977	0.448685	MSMEG_4234	MSMEG_4234
-5.49672	5.59964	5.50438	0.0189768	0.453777	MSMEG_3832	MSMEG_3832
-5.4599	10.9011	97.0228	7.56e-23	1.85e-19	MSMEG_1243	MSMEG_1243
-5.43945	5.20859	5.1152	0.0237259	0.50788	MSMEG_5923	MSMEG_5923
-5.43645	6.03225	5.34812	0.0207529	0.473759	MSMEG_2572	MSMEG_2572
-5.40093	4.81502	5.45784	0.0194888	0.4571	MSMEG_1912	MSMEG_1912
-5.39213	4.74496	5.53501	0.0186475	0.452524	MSMEG_0504	MSMEG_0504
-5.28437	5.65105	4.7544	0.029233	0.547803	MSMEG_4202	MSMEG_4202
-5.282	4.94727	5.05691	0.0245368	0.514015	MSMEG_6019	MSMEG_6019
-5.28159	4.89068	5.12133	0.0236422	0.50788	hypC	MSMEG_2274
-5.12172	5.42997	4.44832	0.0349456	0.594804	MSMEG_1287	MSMEG_1287
-5.11979	5.53741	4.44219	0.0350713	0.594878	MSMEG_6072	MSMEG_6072
-5.11975	5.6206	4.45895	0.0347289	0.593175	MSMEG_4447	MSMEG_4447
-5.10223	6.18539	13.0665	0.000301223	0.0391206	MSMEG_5653	MSMEG_5653
-4.95112	5.17125	3.77775	0.0519499	0.638583	MSMEG_0480	MSMEG_0480
-4.93265	11.4338	86.0855	1.86e-20	3.04e-17	MSMEG_1245	MSMEG_1245
-4.89315	4.82324	3.90597	0.0481261	0.632598	MSMEG_0771	MSMEG_0771
-4.87461	4.73122	3.94791	0.0469406	0.632598	sthA	MSMEG_2748
-4.84778	4.60224	4.00867	0.045278	0.626123	MSMEG_2297	MSMEG_2297
-4.84778	4.60224	4.00867	0.045278	0.626123	MSMEG_0497	MSMEG_0497
-4.77431	5.23622	3.50552	0.0611767	0.645165	MSMEG_4190	MSMEG_4190
-4.77282	5.18965	3.52057	0.0606236	0.645165	MSMEG_6277	MSMEG_6277
-4.77072	5.13103	3.54275	0.0598179	0.645165	MSMEG_5045	MSMEG_5045
-4.7675	5.05096	3.57833	0.0585499	0.645165	MSMEG_1140	MSMEG_1140
-4.76148	6.58394	13.0285	0.000307397	0.0391206	MSMEG_0674	MSMEG_0674
-4.75454	4.78584	3.72941	0.0534737	0.642471	speB	MSMEG_3535
-4.75392	4.77437	3.73678	0.0532385	0.641216	MSMEG_1386	MSMEG_1386
-4.75392	4.77437	3.73678	0.0532385	0.641216	MSMEG_2869	MSMEG_2869
-4.75197	4.73842	3.76018	0.0524985	0.640471	MSMEG_2590	MSMEG_2590
-4.74843	4.67424	3.80284	0.0511772	0.638583	MSMEG_4408	MSMEG_4408
-4.74109	4.54174	3.8928	0.0485046	0.632598	MSMEG_4155	MSMEG_4155
-4.65445	4.50237	3.79205	0.0515081	0.638583	MSMEG_2234	MSMEG_2234
-4.65377	4.51033	3.78518	0.0517197	0.638583	MSMEG_6668	MSMEG_6668
-4.65319	4.51705	3.77938	0.0518992	0.638583	MSMEG_5997	MSMEG_5997
-4.64994	4.55447	3.74708	0.0529112	0.641216	MSMEG_0232	MSMEG_0232
-4.63973	4.6711	3.64723	0.0561743	0.645165	MSMEG_6931	MSMEG_6931
-4.63581	4.716	3.60964	0.0574572	0.645165	MSMEG_3361	MSMEG_3361
-4.63581	4.716	3.60964	0.0574572	0.645165	MSMEG_5996	MSMEG_5996
-4.63581	4.716	3.60964	0.0574572	0.645165	MSMEG_6263	MSMEG_6263
-4.63581	4.716	3.60964	0.0574572	0.645165	MSMEG_6845	MSMEG_6845
-4.6354	4.72071	3.60574	0.0575923	0.645165	MSMEG_1237	MSMEG_1237
-4.63469	4.72893	3.59895	0.0578279	0.645165	MSMEG_3425	MSMEG_3425
-4.63297	4.74882	3.58264	0.058398	0.645165	soxR	MSMEG_5450
-4.6317	4.76364	3.57061	0.0588227	0.645165	MSMEG_6876	MSMEG_6876
-4.63101	4.77167	3.56413	0.0590525	0.645165	MSMEG_5207	MSMEG_5207
-4.62961	4.78819	3.55091	0.0595246	0.645165	MSMEG_5657	MSMEG_5657
-4.62347	4.86196	3.49377	0.0616121	0.645165	MSMEG_6792	MSMEG_6792
-4.62305	4.86712	3.4899	0.0617561	0.645165	MSMEG_4159	MSMEG_4159
-4.62126	4.88937	3.47344	0.0623733	0.645165	MSMEG_6327	MSMEG_6327
-4.62087	4.89433	3.46982	0.06251	0.645165	MSMEG_1217	MSMEG_1217
-4.61016	6.19272	3.55564	0.0593551	0.645165	MSMEG_1795	MSMEG_1795
-4.60979	5.043	3.37074	0.066376	0.653206	MSMEG_1251	MSMEG_1251
-4.60885	5.05675	3.36261	0.0667043	0.653206	MSMEG_4588	MSMEG_4588
-4.60573	5.10453	3.3359	0.0677954	0.654941	MSMEG_6347	MSMEG_6347
-4.60229	5.16184	3.3072	0.0689892	0.657672	MSMEG_3358	MSMEG_3358
-4.5959	5.28951	3.25782	0.071096	0.660212	MSMEG_5339	MSMEG_5339
-4.59414	5.33396	3.24579	0.0716194	0.660212	MSMEG_0579	MSMEG_0579
-4.5941	5.33508	3.24552	0.0716311	0.660212	MSMEG_5718	MSMEG_5718
-4.59211	5.39643	3.23381	0.0721452	0.660212	MSMEG_0902	MSMEG_0902
-4.58943	5.57166	3.23273	0.0721924	0.660212	MSMEG_0687	MSMEG_0687
-4.5723	11.4976	76.5054	2.33e-18	2.29e-15	MSMEG_1246	MSMEG_1246
-4.4623	5.74413	7.25592	0.00707159	0.27082	MSMEG_2006	MSMEG_2006
-4.32587	5.76518	7.3499	0.00671132	0.259046	MSMEG_0484	MSMEG_0484
-4.06273	6.12242	10.3782	0.00127678	0.103194	MSMEG_3384	MSMEG_3384
-4.02023	6.81402	16.4389	5.04e-05	0.0102942	MSMEG_2270	MSMEG_2270
-3.97559	5.54136	5.77901	0.016226	0.422523	MSMEG_0616	MSMEG_0616
-3.94161	5.87737	6.11555	0.0134065	0.372908	MSMEG_3409	MSMEG_3409
-3.9213	5.55431	1.95555	0.162003	0.708587	MSMEG_4380	MSMEG_4380
-3.91929	5.4536	1.9496	0.162643	0.708587	MSMEG_3313	MSMEG_3313
-3.91365	5.3315	1.94822	0.162791	0.708587	MSMEG_2787	MSMEG_2787
-3.91069	6.2718	9.00945	0.00268858	0.155089	MSMEG_4193	MSMEG_4193
-3.90889	5.25982	1.95031	0.162566	0.708587	MSMEG_6891	MSMEG_6891
-3.90714	5.23657	1.95141	0.162448	0.708587	MSMEG_3480	MSMEG_3480
-3.90618	5.22438	1.95206	0.162377	0.708587	MSMEG_6628	MSMEG_6628
-3.90087	5.16176	1.95623	0.161929	0.708587	MSMEG_3238	MSMEG_3238
-3.89762	5.12664	1.95913	0.161619	0.708587	MSMEG_5846	MSMEG_5846
-3.89352	5.08484	1.96306	0.161199	0.708587	MSMEG_2131	MSMEG_2131
-3.8895	5.04591	1.96716	0.160763	0.708587	MSMEG_0794	MSMEG_0794
-3.88406	4.99565	1.97303	0.160139	0.708587	MSMEG_4097	MSMEG_4097
-3.88314	7.05697	14.3387	0.000153054	0.0267954	MSMEG_6642	MSMEG_6642
-3.88254	4.98205	1.97472	0.15996	0.708587	MSMEG_2251	MSMEG_2251
-3.87858	4.94725	1.97924	0.159483	0.708587	MSMEG_5389	MSMEG_5389
-3.87754	4.93827	1.98045	0.159356	0.708587	MSMEG_2949	MSMEG_2949
-3.87559	5.84239	5.34494	0.0207907	0.473759	MSMEG_6777	MSMEG_6777
-3.86569	4.83901	1.99484	0.157849	0.708587	MSMEG_2790	MSMEG_2790
-3.86328	4.81928	1.9979	0.15753	0.708587	MSMEG_4733	MSMEG_4733
-3.86038	4.79567	2.00163	0.157142	0.708587	MSMEG_2808	MSMEG_2808
-3.85997	4.79239	2.00216	0.157088	0.708587	MSMEG_5147	MSMEG_5147
-3.85914	4.78565	2.00324	0.156976	0.708587	MSMEG_0992	MSMEG_0992
-3.85885	4.78336	2.00361	0.156937	0.708587	MSMEG_0192	MSMEG_0192
-3.85775	4.77444	2.00506	0.156788	0.708587	MSMEG_4579	MSMEG_4579
-3.85723	4.77027	2.00574	0.156717	0.708587	MSMEG_5886	MSMEG_5886
-3.8462	4.68144	2.0207	0.15518	0.708587	MSMEG_0563	MSMEG_0563
-3.84383	4.66232	2.02402	0.154842	0.708587	MSMEG_1578	MSMEG_1578
-3.83889	4.62211	2.03109	0.154122	0.708587	MSMEG_2493	MSMEG_2493
-3.83303	4.57385	2.03972	0.153251	0.708587	MSMEG_5282	MSMEG_5282
-3.82626	4.51675	2.05005	0.152214	0.708587	rhaD	MSMEG_0590
-3.82352	4.49309	2.05435	0.151784	0.708587	MSMEG_2674	MSMEG_2674
-3.82015	4.46353	2.05974	0.151249	0.708587	MSMEG_5606	MSMEG_5606
-3.81564	4.42285	2.06715	0.150515	0.708587	MSMEG_3719	MSMEG_3719
-3.81398	4.40755	2.06994	0.150241	0.708587	glnT	MSMEG_6260
-3.79987	5.38166	4.77237	0.0289295	0.545983	ligC	MSMEG_6304
-3.738	4.39128	2.01317	0.155952	0.708587	MSMEG_1976	MSMEG_1976
-3.73763	4.39951	2.01073	0.156203	0.708587	MSMEG_2899	MSMEG_2899
-3.73538	4.4473	1.99644	0.157682	0.708587	MSMEG_3458	MSMEG_3458
-3.73505	4.45408	1.9944	0.157894	0.708587	MSMEG_6732	MSMEG_6732
-3.73505	4.45408	1.9944	0.157894	0.708587	MSMEG_6810	MSMEG_6810
-3.735	4.45528	1.99404	0.157932	0.708587	MSMEG_0509	MSMEG_0509
-3.735	4.45528	1.99404	0.157932	0.708587	MSMEG_6710	MSMEG_6710
-3.73467	4.46204	1.992	0.158145	0.708587	MSMEG_1846	MSMEG_1846
-3.73467	4.46204	1.992	0.158145	0.708587	MSMEG_1975	MSMEG_1975
-3.73396	4.47673	1.98756	0.158609	0.708587	MSMEG_5379	MSMEG_5379
-3.73396	4.47673	1.98756	0.158609	0.708587	MSMEG_6456	MSMEG_6456
-3.7324	4.50831	1.97799	0.159615	0.708587	MSMEG_0821	MSMEG_0821
-3.73213	4.51366	1.97636	0.159787	0.708587	MSMEG_1250	MSMEG_1250
-3.73213	4.51366	1.97636	0.159787	0.708587	MSMEG_5498	MSMEG_5498
-3.73207	4.51485	1.976	0.159825	0.708587	MSMEG_2428	MSMEG_2428
-3.73207	4.51485	1.976	0.159825	0.708587	MSMEG_2484	MSMEG_2484
-3.73207	4.51485	1.976	0.159825	0.708587	MSMEG_2494	MSMEG_2494
-3.73207	4.51485	1.976	0.159825	0.708587	MSMEG_3387	MSMEG_3387
-3.73207	4.51485	1.976	0.159825	0.708587	MSMEG_5111	MSMEG_5111
-3.73175	4.52138	1.97401	0.160035	0.708587	MSMEG_6735	MSMEG_6735
-3.73097	4.53677	1.96933	0.160532	0.708587	MSMEG_1276	MSMEG_1276
-3.72991	4.55768	1.96297	0.161209	0.708587	MSMEG_5909	MSMEG_5909
-3.72927	4.57033	1.95912	0.16162	0.708587	MSMEG_5217	MSMEG_5217
-3.72882	4.579	1.95649	0.161902	0.708587	MSMEG_0104	MSMEG_0104
-3.7285	4.58529	1.95458	0.162107	0.708587	MSMEG_0155	MSMEG_0155
-3.72779	4.59901	1.95041	0.162555	0.708587	MSMEG_5950	MSMEG_5950
-3.72775	4.59983	1.95016	0.162582	0.708587	MSMEG_5908	MSMEG_5908
-3.72743	4.60598	1.9483	0.162783	0.708587	MSMEG_5850	MSMEG_5850
-3.72737	4.60715	1.94795	0.162821	0.708587	MSMEG_0998	MSMEG_0998
-3.72711	4.61212	1.94644	0.162984	0.708587	MSMEG_0667	MSMEG_0667
-3.72705	4.61329	1.94609	0.163022	0.708587	MSMEG_2978	MSMEG_2978
-3.72679	4.61825	1.94459	0.163184	0.708587	MSMEG_1391	MSMEG_1391
-3.72673	4.61942	1.94423	0.163222	0.708587	MSMEG_0626	MSMEG_0626
-3.72565	4.64006	1.93801	0.163898	0.708587	MSMEG_6787	MSMEG_6787
-3.72533	4.64626	1.93614	0.164101	0.708587	phhB	MSMEG_5150
-3.72502	4.65219	1.93436	0.164295	0.708587	hisD	MSMEG_5656
-3.72501	4.65223	1.93435	0.164296	0.708587	MSMEG_6872	MSMEG_6872
-3.72464	4.65935	1.93222	0.164529	0.708587	MSMEG_5407	MSMEG_5407
-3.72408	4.67007	1.92901	0.164879	0.708587	MSMEG_0175	MSMEG_0175
-3.72408	4.67007	1.92901	0.164879	0.708587	MSMEG_3110	MSMEG_3110
-3.72396	4.67239	1.92832	0.164955	0.708587	MSMEG_2402	MSMEG_2402
-3.72365	4.67831	1.92655	0.165149	0.708587	MSMEG_1330	MSMEG_1330
-3.72365	4.67831	1.92655	0.165149	0.708587	MSMEG_5081	MSMEG_5081
-3.72358	4.67947	1.92621	0.165186	0.708587	MSMEG_4162	MSMEG_4162
-3.72234	4.70302	1.91923	0.165954	0.708587	MSMEG_4743	MSMEG_4743
-3.72207	4.70816	1.91771	0.166121	0.708587	MSMEG_0757	MSMEG_0757
-3.72161	4.71703	1.91511	0.16641	0.708587	MSMEG_0716	MSMEG_0716
-3.72141	4.72082	1.914	0.166533	0.708587	MSMEG_5208	MSMEG_5208
-3.72141	4.72082	1.914	0.166533	0.708587	MSMEG_5218	MSMEG_5218
-3.72044	4.73921	1.90864	0.167127	0.708587	MSMEG_6100	MSMEG_6100
-3.71978	4.75169	1.90503	0.167529	0.708587	MSMEG_6567	MSMEG_6567
-3.7193	4.76081	1.9024	0.167822	0.708587	thiL	MSMEG_2398
-3.7192	4.7628	1.90183	0.167886	0.708587	MSMEG_2153	MSMEG_2153
-3.71914	4.76394	1.90151	0.167922	0.708587	MSMEG_1901	MSMEG_1901
-3.7189	4.76839	1.90023	0.168065	0.708587	MSMEG_2406	MSMEG_2406
-3.71734	4.79838	1.89175	0.169018	0.708587	MSMEG_4894	MSMEG_4894
-3.71714	4.80209	1.89071	0.169135	0.708587	MSMEG_0260	MSMEG_0260
-3.71664	4.81166	1.88804	0.169435	0.708587	ehuA	MSMEG_5371
-3.71652	4.81408	1.88737	0.169511	0.708587	MSMEG_3922	MSMEG_3922
-3.7165	4.81441	1.88728	0.169521	0.708587	MSMEG_2813	MSMEG_2813
-3.71634	4.81745	1.88644	0.169616	0.708587	MSMEG_5398	MSMEG_5398
-3.71624	4.81949	1.88588	0.16968	0.708587	MSMEG_5699	MSMEG_5699
-3.71622	4.81976	1.8858	0.169689	0.708587	MSMEG_0751	MSMEG_0751
-3.71578	4.82826	1.88347	0.169953	0.708587	MSMEG_5330	MSMEG_5330
-3.71568	4.83027	1.88291	0.170016	0.708587	MSMEG_6883	MSMEG_6883
-3.71501	4.84329	1.87937	0.170418	0.708587	MSMEG_6060	MSMEG_6060
-3.71453	4.8527	1.87683	0.170707	0.708587	MSMEG_0506	MSMEG_0506
-3.71435	4.8561	1.87592	0.170811	0.708587	MSMEG_0827	MSMEG_0827
-3.71426	4.85792	1.87543	0.170867	0.708587	modB	MSMEG_2015
-3.71361	4.87077	1.87202	0.171257	0.708587	MSMEG_1452	MSMEG_1452
-3.71315	4.8798	1.86964	0.171529	0.708587	MSMEG_2840	MSMEG_2840
-3.71313	4.88012	1.86956	0.171539	0.708587	MSMEG_6133	MSMEG_6133
-3.71276	4.88756	1.86761	0.171761	0.708587	MSMEG_3270	MSMEG_3270
-3.71169	4.90881	1.86215	0.172389	0.708587	MSMEG_5186	MSMEG_5186
-3.71113	4.92011	1.85929	0.172719	0.708587	MSMEG_4906	MSMEG_4906
-3.71088	4.92514	1.85803	0.172865	0.708587	MSMEG_4023	MSMEG_4023
-3.70979	4.94749	1.85253	0.173502	0.708587	MSMEG_2639	MSMEG_2639
-3.70969	4.9495	1.85204	0.173559	0.708587	MSMEG_5787	MSMEG_5787
-3.70879	4.96825	1.84755	0.174082	0.708587	MSMEG_3554	MSMEG_3554
-3.70858	4.97259	1.84652	0.174201	0.708587	MSMEG_4430	MSMEG_4430
-3.70732	4.9993	1.84036	0.174921	0.708587	MSMEG_1796	MSMEG_1796
-3.70622	5.02321	1.83505	0.175545	0.708587	MSMEG_2105	MSMEG_2105
-3.70499	5.0506	1.82922	0.176232	0.708587	MSMEG_0130	MSMEG_0130
-3.70454	5.06084	1.82711	0.176481	0.708587	MSMEG_5869	MSMEG_5869
-3.70388	5.07624	1.82403	0.176847	0.708587	MSMEG_1369	MSMEG_1369
-3.70366	5.08121	1.82305	0.176963	0.708587	MSMEG_0686	MSMEG_0686
-3.70265	5.10527	1.81846	0.177509	0.708587	MSMEG_0884	MSMEG_0884
-3.70223	5.11563	1.81656	0.177736	0.708587	MSMEG_5390	MSMEG_5390
-3.70149	5.13395	1.81331	0.178124	0.708587	MSMEG_1766	MSMEG_1766
-3.70134	5.13779	1.81265	0.178203	0.708587	MSMEG_6645	MSMEG_6645
-3.70119	5.14164	1.81199	0.178282	0.708587	MSMEG_5812	MSMEG_5812
-3.70032	5.16433	1.80825	0.17873	0.708587	MSMEG_5981	MSMEG_5981
-3.69968	5.18147	1.80559	0.179051	0.708587	MSMEG_0785	MSMEG_0785
-3.69878	5.20673	1.80191	0.179494	0.708587	MSMEG_3815	MSMEG_3815
-3.69789	5.23315	1.79841	0.179917	0.708587	MSMEG_5855	MSMEG_5855
-3.69773	5.23798	1.79781	0.17999	0.708587	MSMEG_6865	MSMEG_6865
-3.69686	5.26564	1.79459	0.18038	0.708587	MSMEG_0500	MSMEG_0500
-3.69597	5.29611	1.79153	0.180753	0.708587	MSMEG_6597	MSMEG_6597
-3.6957	5.30583	1.79066	0.180859	0.708587	MSMEG_3670	MSMEG_3670
-3.69459	5.3499	1.78739	0.181257	0.708587	MSMEG_3681	MSMEG_3681
-3.6945	5.35369	1.78716	0.181285	0.708587	folK	MSMEG_6101
-3.69345	5.40438	1.78495	0.181555	0.708587	MSMEG_5529	MSMEG_5529
-3.69325	5.41504	1.78469	0.181587	0.708587	aroE	MSMEG_3028
-3.69323	5.41662	1.78466	0.181591	0.708587	MSMEG_0782	MSMEG_0782
-3.69283	5.4411	1.78434	0.181629	0.708587	MSMEG_2488	MSMEG_2488
-3.69194	5.63882	1.79569	0.180247	0.708587	MSMEG_3481	MSMEG_3481
-3.69192	5.52826	1.78628	0.181393	0.708587	MSMEG_4022	MSMEG_4022
-3.64294	5.80337	4.68133	0.0305018	0.549705	MSMEG_1606	MSMEG_1606
-3.61763	10.2771	51.0998	9.02e-13	7.37e-10	MSMEG_6081	MSMEG_6081
-3.61727	5.88002	6.24969	0.012428	0.36263	MSMEG_5015	MSMEG_5015
-3.58137	6.29389	8.91464	0.00283174	0.15774	MSMEG_6247	MSMEG_6247
-3.54237	5.34545	4.1596	0.0414099	0.622896	MSMEG_4707	MSMEG_4707
-3.53465	5.20917	4.23411	0.0396299	0.622838	MSMEG_6885	MSMEG_6885
-3.48923	5.57076	3.98232	0.0459913	0.629877	MSMEG_1793	MSMEG_1793
-3.42847	5.45696	3.62438	0.0569506	0.645165	MSMEG_6147	MSMEG_6147
-3.4131	5.61268	4.7517	0.0292788	0.547803	MSMEG_0545	MSMEG_0545
-3.33589	5.6989	3.85528	0.0496008	0.638171	MSMEG_6293	MSMEG_6293
-3.29823	4.9249	4.07902	0.0434296	0.626123	MSMEG_1754	MSMEG_1754
-3.28373	5.70477	3.58729	0.0582349	0.645165	MSMEG_5767	MSMEG_5767
-3.28316	5.67391	3.34858	0.0672751	0.654941	MSMEG_4966	MSMEG_4966
-3.2739	5.29049	3.37075	0.0663756	0.653206	MSMEG_6916	MSMEG_6916
-3.25532	7.59594	15.6775	7.53e-05	0.0147699	xfp	MSMEG_3611
-3.24792	5.41452	4.70039	0.0301653	0.548061	MSMEG_1939	MSMEG_1939
-3.24611	8.97567	25.6512	4.12e-07	0.000195469	MSMEG_1802	MSMEG_1802
-3.24118	6.14748	5.66366	0.0173276	0.435589	MSMEG_6728	MSMEG_6728
-3.22814	5.72758	3.46758	0.0625949	0.645165	pdxH	MSMEG_5675
-3.16818	8.06154	15.0602	0.000104411	0.0196854	MSMEG_1540	MSMEG_1540
-3.15003	7.03826	11.3617	0.000750881	0.0736164	MSMEG_2982	MSMEG_2982
-3.13313	5.31588	3.08192	0.0791795	0.676779	MSMEG_0729	MSMEG_0729
-3.12298	6.21861	3.47964	0.0621404	0.645165	MSMEG_3215	MSMEG_3215
-3.10947	4.70557	3.66288	0.055649	0.645165	MSMEG_1105	MSMEG_1105
-3.10238	6.45275	8.9985	0.00270473	0.155089	MSMEG_3230	MSMEG_3230
-3.10084	5.33283	2.74092	0.0978212	0.708587	ssuD	MSMEG_4590
-3.08828	7.26987	11.8655	0.000572796	0.0668534	MSMEG_6366	MSMEG_6366
-3.07069	8.96874	23.2388	1.44e-06	0.000542746	MSMEG_1650	MSMEG_1650
-3.04061	6.09097	4.2396	0.0395021	0.622838	MSMEG_3958	MSMEG_3958
-3.03242	7.19451	8.23074	0.00412219	0.200669	MSMEG_6319	MSMEG_6319
-2.99856	5.05299	3.01583	0.0824676	0.689237	MSMEG_0746	MSMEG_0746
-2.99042	5.65043	2.79171	0.0947659	0.708587	MSMEG_5778	MSMEG_5778
-2.96122	5.42484	3.42505	0.0642263	0.64915	MSMEG_0650	MSMEG_0650
-2.94501	5.67452	2.46891	0.116131	0.708587	MSMEG_2461	MSMEG_2461
-2.94278	5.43575	2.44939	0.117584	0.708587	MSMEG_5843	MSMEG_5843
-2.93641	5.33649	2.46133	0.116693	0.708587	MSMEG_6343	MSMEG_6343
-2.93638	5.50366	4.35989	0.0368049	0.600818	MSMEG_4101	MSMEG_4101
-2.88209	6.79416	9.1692	0.00246379	0.151147	MSMEG_6454	MSMEG_6454
-2.87644	5.90908	2.68129	0.101546	0.708587	MSMEG_5726	MSMEG_5726
-2.87326	5.78652	4.73531	0.0295591	0.548061	MSMEG_2548	MSMEG_2548
-2.86903	6.54828	8.18972	0.00421642	0.200669	MSMEG_0600	MSMEG_0600
-2.8654	4.82315	2.66455	0.102619	0.708587	MSMEG_6556	MSMEG_6556
-2.86226	4.80373	2.67607	0.101879	0.708587	MSMEG_3700	MSMEG_3700
-2.85822	4.96964	2.81596	0.093344	0.708587	MSMEG_6230	MSMEG_6230
-2.85524	5.60109	3.96797	0.0463847	0.631605	MSMEG_4740	MSMEG_4740
-2.85503	5.64071	3.98197	0.0460008	0.629877	MSMEG_2268	MSMEG_2268
-2.85126	7.24734	11.1735	0.000830987	0.0779369	MSMEG_6557	MSMEG_6557
-2.84815	6.22464	4.0921	0.043095	0.626123	MSMEG_1317	MSMEG_1317
-2.83827	5.09647	2.67013	0.10226	0.708587	MSMEG_4304	MSMEG_4304
-2.83103	5.07141	2.40661	0.120837	0.708587	MSMEG_2489	MSMEG_2489
-2.83073	4.83534	2.88792	0.0892588	0.708587	MSMEG_4412	MSMEG_4412
-2.8075	6.86041	7.50609	0.00615351	0.253483	MSMEG_4683	MSMEG_4683
-2.79805	6.42306	6.53254	0.0105978	0.333241	MSMEG_5014	MSMEG_5014
-2.77648	5.44106	2.19061	0.138867	0.708587	MSMEG_3304	MSMEG_3304
-2.76214	5.09976	2.2906	0.130173	0.708587	MSMEG_6676	MSMEG_6676
-2.76111	5.08275	2.29885	0.129483	0.708587	MSMEG_5285	MSMEG_5285
-2.7518	5.13612	2.24966	0.133656	0.708587	MSMEG_2396	MSMEG_2396
-2.74685	5.92263	4.15181	0.0416008	0.622896	MSMEG_4050	MSMEG_4050
-2.72581	6.0766	4.31907	0.0376979	0.603905	MSMEG_1769	MSMEG_1769
-2.72042	6.21799	5.73743	0.0166145	0.425146	nadB	MSMEG_3200
-2.71264	5.6402	3.01883	0.0823152	0.689237	MSMEG_6143	MSMEG_6143
-2.69465	7.27048	10.1265	0.00146335	0.108687	MSMEG_5848	MSMEG_5848
-2.66872	5.83523	3.71203	0.0540333	0.645165	ltrA	MSMEG_4766
-2.66528	7.76196	10.9967	0.000914091	0.0800156	MSMEG_0132	MSMEG_0132
-2.64985	6.10404	4.14066	0.0418757	0.622896	MSMEG_2267	MSMEG_2267
-2.62155	4.97432	2.1495	0.142629	0.708587	MSMEG_1333	MSMEG_1333
-2.62133	4.98217	2.14421	0.143121	0.708587	MSMEG_4259	MSMEG_4259
-2.6183	5.10309	2.07073	0.150162	0.708587	MSMEG_1660	MSMEG_1660
-2.61732	5.15007	2.04644	0.152575	0.708587	MSMEG_1799	MSMEG_1799
-2.61732	5.15011	2.04642	0.152577	0.708587	MSMEG_3920	MSMEG_3920
-2.61507	5.2904	1.98944	0.158413	0.708587	MSMEG_6922	MSMEG_6922
-2.61474	5.86063	2.03179	0.154052	0.708587	MSMEG_0085	MSMEG_0085
-2.614	5.39211	1.96384	0.161116	0.708587	MSMEG_5810	MSMEG_5810
-2.61376	5.42418	1.9587	0.161666	0.708587	MSMEG_2574	MSMEG_2574
-2.6134	5.48951	1.95271	0.162308	0.708587	prpB	MSMEG_6646
-2.61322	5.60135	1.95695	0.161853	0.708587	MSMEG_2224	MSMEG_2224
-2.61322	5.56886	1.95379	0.162191	0.708587	MSMEG_5046	MSMEG_5046
-2.61278	4.93273	2.1554	0.142083	0.708587	MSMEG_0503	MSMEG_0503
-2.60614	5.6445	3.59686	0.0579007	0.645165	MSMEG_0575	MSMEG_0575
-2.60409	7.28443	10.0879	0.00149429	0.109329	MSMEG_6486	MSMEG_6486
-2.60081	5.77462	2.94248	0.086291	0.699171	MSMEG_3401	MSMEG_3401
-2.59673	5.22468	1.97602	0.159823	0.708587	MSMEG_6177	MSMEG_6177
-2.58886	5.5088	1.90772	0.167229	0.708587	MSMEG_4019	MSMEG_4019
-2.54177	6.41141	4.20073	0.0404171	0.622896	MSMEG_4225	MSMEG_4225
-2.52128	7.00207	7.89399	0.00496386	0.218123	MSMEG_1794	MSMEG_1794
-2.50911	5.57779	2.6476	0.103719	0.708587	MSMEG_2675	MSMEG_2675
-2.49595	6.02932	4.05109	0.0441537	0.626123	MSMEG_3397	MSMEG_3397
-2.4951	6.55024	5.80272	0.0160088	0.421909	MSMEG_2445	MSMEG_2445
-2.49227	7.93192	10.1797	0.00142171	0.107218	MSMEG_1222	MSMEG_1222
-2.49112	4.67059	2.14713	0.14285	0.708587	MSMEG_3984	MSMEG_3984
-2.48817	5.87847	2.64608	0.103819	0.708587	MSMEG_1065	MSMEG_1065
-2.47276	5.03708	2.64986	0.103572	0.708587	MSMEG_1090	MSMEG_1090
-2.46727	5.79146	2.28138	0.130949	0.708587	MSMEG_5074	MSMEG_5074
-2.46549	6.17141	1.96311	0.161194	0.708587	alc	MSMEG_5727
-2.41332	5.06485	1.50512	0.219896	0.72707	MSMEG_1751	MSMEG_1751
-2.41175	6.09682	4.00623	0.0453435	0.626123	MSMEG_5287	MSMEG_5287
-2.40165	5.04001	1.77351	0.182961	0.708587	MSMEG_1318	MSMEG_1318
-2.36496	4.86025	1.52366	0.217079	0.72707	MSMEG_0353	MSMEG_0353
-2.36266	5.87361	2.79884	0.0943456	0.708587	MSMEG_0713	MSMEG_0713
-2.34527	4.78554	1.53108	0.215963	0.72707	MSMEG_3855	MSMEG_3855
-2.34232	5.7039	2.48868	0.114681	0.708587	MSMEG_1113	MSMEG_1113
-2.34091	5.45622	1.56972	0.21026	0.72707	MSMEG_2761	MSMEG_2761
-2.33666	5.94405	2.3906	0.12208	0.708587	MSMEG_6561	MSMEG_6561
-2.32572	5.50972	1.9792	0.159488	0.708587	MSMEG_5836	MSMEG_5836
-2.32254	7.66141	7.18208	0.00736843	0.276204	hypD	MSMEG_2275
-2.32069	5.32858	2.00515	0.156779	0.708587	MSMEG_0435	MSMEG_0435
-2.31343	5.37752	1.97295	0.160147	0.708587	MSMEG_6753	MSMEG_6753
-2.30884	5.96066	2.09019	0.148261	0.708587	MSMEG_6330	MSMEG_6330
-2.30541	7.78975	8.41483	0.00372504	0.188249	MSMEG_1910	MSMEG_1910
-2.28307	5.58758	2.04002	0.15322	0.708587	eutB	MSMEG_1553
-2.27906	7.87058	8.34809	0.00386431	0.193295	MSMEG_1808	MSMEG_1808
-2.27854	5.58048	2.21009	0.137124	0.708587	MSMEG_4132	MSMEG_4132
-2.27407	4.94169	2.31854	0.127853	0.708587	MSMEG_0585	MSMEG_0585
-2.27344	5.58528	1.28009	0.257893	0.745842	MSMEG_2950	MSMEG_2950
-2.27071	5.22421	1.30222	0.253819	0.745842	MSMEG_0236	MSMEG_0236
-2.27046	5.42293	1.27723	0.258427	0.745842	MSMEG_5691	MSMEG_5691
-2.26987	5.7627	1.29909	0.254391	0.745842	MSMEG_2072	MSMEG_2072
-2.25317	5.99525	2.4727	0.115852	0.708587	MSMEG_0290	MSMEG_0290
-2.25104	5.12541	1.30626	0.253085	0.745842	MSMEG_1283	MSMEG_1283
-2.2467	6.28469	3.10397	0.0781142	0.673217	MSMEG_3301	MSMEG_3301
-2.24256	6.39822	2.88981	0.0891541	0.708587	MSMEG_1097	MSMEG_1097
-2.22109	4.8435	1.36353	0.242937	0.735474	MSMEG_5364	MSMEG_5364
-2.21821	5.53438	1.99197	0.158148	0.708587	MSMEG_5888	MSMEG_5888
-2.21364	6.95783	3.3308	0.0680059	0.654941	MSMEG_3056	MSMEG_3056
-2.21165	6.91664	4.88955	0.027029	0.536421	gatA	MSMEG_2365
-2.20756	7.91406	7.21553	0.00723241	0.274832	metX	MSMEG_1651
-2.20632	5.88508	2.30746	0.128768	0.708587	MSMEG_3126	MSMEG_3126
-2.19828	6.71553	5.34884	0.0207443	0.473759	MSMEG_2115	MSMEG_2115
-2.18911	5.01573	1.26377	0.260949	0.745842	MSMEG_6318	MSMEG_6318
-2.17998	4.80162	1.32763	0.249238	0.743072	MSMEG_5349	MSMEG_5349
-2.17	5.9383	1.8434	0.174566	0.708587	MSMEG_1982	MSMEG_1982
-2.1685	5.70168	1.74697	0.18627	0.712118	MSMEG_4469	MSMEG_4469
-2.16509	6.08054	3.19299	0.0739672	0.662245	MSMEG_2665	MSMEG_2665
-2.15586	5.88871	2.17632	0.140162	0.708587	MSMEG_3459	MSMEG_3459
-2.1554	8.78286	11.5171	0.000690674	0.0720358	hybC	MSMEG_2263
-2.15105	7.24734	6.8878	0.008684	0.293579	MSMEG_0185	MSMEG_0185
-2.13368	5.47677	1.5141	0.218527	0.72707	MSMEG_3283	MSMEG_3283
-2.13147	5.79928	2.57378	0.108661	0.708587	MSMEG_2083	MSMEG_2083
-2.12767	6.3528	3.58517	0.0583093	0.645165	MSMEG_5506	MSMEG_5506
-2.11319	5.31224	1.81726	0.177653	0.708587	MSMEG_6310	MSMEG_6310
-2.11255	5.54544	2.11594	0.145785	0.708587	MSMEG_1791	MSMEG_1791
-2.11178	5.774	1.95844	0.161693	0.708587	murD	MSMEG_4229
-2.10239	6.03144	1.7725	0.183085	0.708587	MSMEG_6882	MSMEG_6882
-2.1009	4.57633	1.32696	0.249358	0.743072	MSMEG_3274	MSMEG_3274
-2.09732	5.11412	2.15928	0.141724	0.708587	MSMEG_1114	MSMEG_1114
-2.09643	6.74026	5.42128	0.0199009	0.464543	MSMEG_5363	MSMEG_5363
-2.09485	4.84988	1.22018	0.269337	0.757744	MSMEG_3420	MSMEG_3420
-2.09458	4.86218	1.21576	0.270205	0.757744	MSMEG_6606	MSMEG_6606
-2.09437	5.95494	2.25568	0.133138	0.708587	murB	MSMEG_0928
-2.09427	4.54253	1.33418	0.248074	0.741952	MSMEG_5952	MSMEG_5952
-2.09219	4.64095	1.29501	0.255137	0.745842	MSMEG_4764	MSMEG_4764
-2.0883	4.85546	1.21509	0.270337	0.757744	MSMEG_1232	MSMEG_1232
-2.08787	4.88345	1.20557	0.272223	0.759929	MSMEG_6733	MSMEG_6733
-2.08617	5.01019	1.16602	0.28023	0.763138	MSMEG_4145	MSMEG_4145
-2.08593	5.8773	1.12926	0.287943	0.763138	MSMEG_1208	MSMEG_1208
-2.08557	5.06357	1.15136	0.283274	0.763138	MSMEG_1323	MSMEG_1323
-2.08546	5.07445	1.14853	0.283867	0.763138	hslR	MSMEG_3455
-2.08511	5.11018	1.13964	0.285738	0.763138	gcvH	MSMEG_3648
-2.08502	5.12064	1.13716	0.286265	0.763138	MSMEG_3308	MSMEG_3308
-2.08475	5.15068	1.13033	0.287716	0.763138	MSMEG_5003	MSMEG_5003
-2.08437	5.45271	1.08521	0.297546	0.763138	purE	MSMEG_1820
-2.08416	5.22903	1.11475	0.291063	0.763138	MSMEG_3731	MSMEG_3731
-2.08408	5.24211	1.11247	0.291555	0.763138	MSMEG_3905	MSMEG_3905
-2.08303	5.56737	1.09035	0.296405	0.763138	MSMEG_6088	MSMEG_6088
-2.08271	6.15492	2.655	0.103237	0.708587	MSMEG_4066	MSMEG_4066
-2.08256	6.33121	3.49073	0.0617255	0.645165	MSMEG_4161	MSMEG_4161
-2.07545	9.8867	16.7508	4.28e-05	0.009528	MSMEG_1247	MSMEG_1247
-2.06684	6.64516	4.69245	0.030305	0.548174	MSMEG_2837	MSMEG_2837
-2.06614	4.58193	1.28343	0.257273	0.745842	MSMEG_3356	MSMEG_3356
-2.06571	7.41767	6.23264	0.0125482	0.363972	MSMEG_6359	MSMEG_6359
-2.0571	10.1538	17.6357	2.68e-05	0.00626678	pyc	MSMEG_2412
-2.05635	4.69415	1.23082	0.267258	0.754755	rarD	MSMEG_5462
-2.03675	5.09736	2.03873	0.15335	0.708587	MSMEG_4810	MSMEG_4810
-2.02629	7.86922	6.38445	0.0115187	0.346409	MSMEG_4448	MSMEG_4448
-2.02171	5.07537	1.07557	0.299701	0.763138	MSMEG_1292	MSMEG_1292
-2.01449	5.89755	1.57872	0.208957	0.72707	MSMEG_0483	MSMEG_0483
-2.01339	5.18094	1.04442	0.306807	0.763138	MSMEG_0962	MSMEG_0962
-2.00791	6.59611	4.01126	0.0452083	0.626123	MSMEG_0795	MSMEG_0795
-2.00744	4.56717	1.22519	0.268356	0.75733	MSMEG_5167	MSMEG_5167
-2.00192	4.94004	1.68242	0.194615	0.722433	MSMEG_2742	MSMEG_2742
-1.99324	7.64732	6.49463	0.0108261	0.335884	MSMEG_0576	MSMEG_0576
-1.99118	4.66614	1.17298	0.2788	0.763138	MSMEG_0231	MSMEG_0231
-1.99005	6.55325	3.90562	0.0481361	0.632598	MSMEG_0512	MSMEG_0512
-1.98266	7.07037	5.50558	0.0189638	0.453777	MSMEG_5967	MSMEG_5967
-1.9757	6.09537	1.61008	0.204492	0.72707	MSMEG_5707	MSMEG_5707
-1.9748	5.75636	2.34587	0.125629	0.708587	cydD	MSMEG_3231
-1.97276	4.57142	1.18396	0.276562	0.763138	MSMEG_1419	MSMEG_1419
-1.96773	6.43334	2.56715	0.109117	0.708587	MSMEG_6184	MSMEG_6184
-1.96655	4.81728	1.09779	0.294762	0.763138	MSMEG_4389	MSMEG_4389
-1.96343	5.97541	1.53034	0.216073	0.72707	ribD	MSMEG_3067
-1.96117	4.62226	1.15391	0.282742	0.763138	MSMEG_0471	MSMEG_0471
-1.95745	4.87523	1.07116	0.300693	0.763138	MSMEG_5797	MSMEG_5797
-1.95371	7.09982	4.77063	0.0289587	0.545983	MSMEG_3856	MSMEG_3856
-1.95201	5.19886	1.32812	0.249151	0.743072	MSMEG_5018	MSMEG_5018
-1.95095	8.17597	6.91302	0.00856238	0.291907	MSMEG_1322	MSMEG_1322
-1.93609	4.73044	1.09158	0.296133	0.763138	MSMEG_2669	MSMEG_2669
-1.93443	5.03363	1.00671	0.315703	0.763138	MSMEG_2281	MSMEG_2281
-1.92876	6.06618	2.09048	0.148233	0.708587	MSMEG_6409	MSMEG_6409
-1.92823	4.94538	1.39793	0.237082	0.73047	MSMEG_0354	MSMEG_0354
-1.92718	6.12649	1.03494	0.309012	0.763138	MSMEG_3214	MSMEG_3214
-1.926	5.09904	0.984193	0.321176	0.763138	MSMEG_6783	MSMEG_6783
-1.92156	5.12779	0.974356	0.323606	0.765171	MSMEG_6611	MSMEG_6611
-1.91514	7.30441	5.615	0.0178151	0.441058	MSMEG_5501	MSMEG_5501
-1.91101	8.39762	6.91847	0.00853635	0.291907	MSMEG_0777	MSMEG_0777
-1.91041	5.16192	0.945427	0.330896	0.765294	MSMEG_3597	MSMEG_3597
-1.90687	5.28131	0.936132	0.333284	0.766288	MSMEG_2140	MSMEG_2140
-1.90026	6.00522	2.06542	0.150686	0.708587	trpD	MSMEG_4258
-1.89659	5.4407	0.913927	0.339084	0.769455	MSMEG_5557	MSMEG_5557
-1.89561	7.49266	4.5568	0.0327981	0.573693	lppH	MSMEG_4597
-1.89362	5.55491	0.910623	0.339959	0.769455	MSMEG_4972	MSMEG_4972
-1.87405	6.64857	3.61143	0.0573956	0.645165	MSMEG_6309	MSMEG_6309
-1.87001	6.25301	2.38979	0.122143	0.708587	MSMEG_3783	MSMEG_3783
-1.84789	5.14632	0.899514	0.342921	0.772063	MSMEG_2207	MSMEG_2207
-1.84161	7.28552	4.0244	0.0448574	0.626123	MSMEG_3863	MSMEG_3863
-1.83664	10.0158	14.0548	0.000177966	0.0281416	MSMEG_6767	MSMEG_6767
-1.83261	5.98887	1.46186	0.226647	0.72707	MSMEG_4357	MSMEG_4357
-1.83159	5.93621	0.896788	0.343654	0.772416	rimM	MSMEG_2437
-1.82625	8.57626	7.45435	0.00633287	0.25656	hypB	MSMEG_2271
-1.82539	5.92168	1.42544	0.232522	0.729334	MSMEG_6765	MSMEG_6765
-1.82057	6.98496	3.3752	0.0661965	0.653206	MSMEG_1737	MSMEG_1737
-1.81673	6.77553	2.32898	0.126998	0.708587	phoU	MSMEG_1605
-1.81093	6.08918	2.08475	0.148789	0.708587	MSMEG_3838	MSMEG_3838
-1.80949	5.72371	1.11871	0.290206	0.763138	MSMEG_5822	MSMEG_5822
-1.80718	5.01074	1.20658	0.272022	0.759929	MSMEG_2099	MSMEG_2099
-1.80658	5.47645	1.48388	0.22318	0.72707	cysE	MSMEG_5947
-1.80464	6.22379	2.7229	0.0989308	0.708587	MSMEG_0722	MSMEG_0722
-1.80227	5.93258	2.17	0.140739	0.708587	MSMEG_2269	MSMEG_2269
-1.80135	5.25997	1.12806	0.288201	0.763138	MSMEG_4062	MSMEG_4062
-1.79945	5.04604	1.18875	0.275592	0.763138	MSMEG_3552	MSMEG_3552
-1.79722	4.76293	1.31123	0.252183	0.745842	MSMEG_1590	MSMEG_1590
-1.79651	6.84309	3.77311	0.0520943	0.638583	MSMEG_1792	MSMEG_1792
-1.79279	9.31894	11.0283	0.000898616	0.0800156	MSMEG_3417	MSMEG_3417
-1.79126	7.72338	4.83754	0.0278559	0.539722	MSMEG_1078	MSMEG_1078
-1.79085	6.04285	1.53073	0.216015	0.72707	MSMEG_5004	MSMEG_5004
-1.78405	8.31758	6.33431	0.0118487	0.353058	MSMEG_1658	MSMEG_1658
-1.77157	6.02387	1.37877	0.240323	0.733841	MSMEG_5128	MSMEG_5128
-1.7666	8.0044	5.61805	0.0177842	0.441058	MSMEG_3941	MSMEG_3941
-1.762	5.36519	1.48741	0.22263	0.72707	MSMEG_6677	MSMEG_6677
-1.75961	6.76409	3.34973	0.0672282	0.654941	MSMEG_3290	MSMEG_3290
-1.75621	8.64537	3.84107	0.050023	0.638583	hypE	MSMEG_2276
-1.7547	7.86712	4.89471	0.0269483	0.536421	uppS	MSMEG_4490
-1.74963	5.6143	1.47221	0.22501	0.72707	MSMEG_5929	MSMEG_5929
-1.74748	5.64118	1.46677	0.225867	0.72707	MSMEG_6781	MSMEG_6781
-1.73577	5.26858	1.0374	0.308437	0.763138	MSMEG_3624	MSMEG_3624
-1.72999	5.67962	1.01377	0.31401	0.763138	MSMEG_3157	MSMEG_3157
-1.72688	6.22455	1.94667	0.162959	0.708587	MSMEG_0463	MSMEG_0463
-1.72285	6.30778	2.17734	0.140069	0.708587	MSMEG_3444	MSMEG_3444
-1.71467	5.93261	1.35246	0.24486	0.735827	MSMEG_6421	MSMEG_6421
-1.71045	5.95791	1.26951	0.259869	0.745842	MSMEG_2754	MSMEG_2754
-1.70782	7.7325	4.43244	0.0352722	0.596221	MSMEG_4240	MSMEG_4240
-1.70358	5.5429	1.30708	0.252936	0.745842	MSMEG_1502	MSMEG_1502
-1.70338	5.18975	1.29234	0.255628	0.745842	MSMEG_4126	MSMEG_4126
-1.7025	6.97087	3.1002	0.0782953	0.673217	MSMEG_1952	MSMEG_1952
-1.69999	8.40981	5.8118	0.0159263	0.421909	MSMEG_0270	MSMEG_0270
-1.69906	5.56072	1.16224	0.281013	0.763138	MSMEG_3338	MSMEG_3338
-1.69882	5.6751	1.17264	0.27887	0.763138	MSMEG_3394	MSMEG_3394
-1.69436	6.03974	1.27864	0.258163	0.745842	MSMEG_3861	MSMEG_3861
-1.69294	5.85417	1.56041	0.211616	0.72707	MSMEG_6223	MSMEG_6223
-1.69253	6.70324	2.44283	0.118076	0.708587	MSMEG_5057	MSMEG_5057
-1.68913	6.33294	1.41516	0.234214	0.729334	ispF	MSMEG_6075
-1.6833	4.91168	1.08998	0.296487	0.763138	MSMEG_1906	MSMEG_1906
-1.6833	5.91851	1.44468	0.229395	0.728791	MSMEG_5153	MSMEG_5153
-1.68186	5.92824	1.71126	0.190835	0.719855	MSMEG_5980	MSMEG_5980
-1.67808	5.52803	1.02254	0.311927	0.763138	MSMEG_1981	MSMEG_1981
-1.67309	10.2521	12.5673	0.000393278	0.0470207	MSMEG_3325	MSMEG_3325
-1.6712	5.78495	1.36849	0.242084	0.735474	MSMEG_4720	MSMEG_4720
-1.66835	6.22475	1.6639	0.19709	0.725325	MSMEG_0970	MSMEG_0970
-1.66613	7.18686	3.20985	0.0732085	0.662119	MSMEG_4214	MSMEG_4214
-1.66434	6.61217	2.72202	0.0989856	0.708587	regX3	MSMEG_0937
-1.6643	7.07031	3.91563	0.0478503	0.632598	MSMEG_1790	MSMEG_1790
-1.65913	5.16913	0.981704	0.321788	0.763138	MSMEG_5671	MSMEG_5671
-1.65716	5.2001	0.97216	0.324152	0.765171	MSMEG_1388	MSMEG_1388
-1.65586	6.78309	3.25015	0.0714291	0.660212	MSMEG_1132	MSMEG_1132
-1.65475	5.24113	0.960716	0.327016	0.765171	MSMEG_0754	MSMEG_0754
-1.65392	5.25644	0.956799	0.328004	0.765294	MSMEG_0207	MSMEG_0207
-1.65374	7.01304	3.38171	0.0659356	0.653206	MSMEG_3345	MSMEG_3345
-1.65322	5.85313	1.54446	0.213967	0.72707	MSMEG_4308	MSMEG_4308
-1.65053	6.91212	2.73946	0.0979105	0.708587	MSMEG_5416	MSMEG_5416
-1.6459	5.57245	0.984414	0.321121	0.763138	MSMEG_1667	MSMEG_1667
-1.64516	5.63833	0.926038	0.335904	0.767355	MSMEG_5566	MSMEG_5566
-1.63834	5.92263	1.21313	0.270724	0.757744	MSMEG_3402	MSMEG_3402
-1.63569	6.37271	2.36586	0.124028	0.708587	MSMEG_4063	MSMEG_4063
-1.63345	5.02862	1.19235	0.274866	0.763138	ctaD	MSMEG_2320
-1.63152	6.03881	1.84013	0.174949	0.708587	MSMEG_2264	MSMEG_2264
-1.63136	6.25601	1.39549	0.237492	0.731272	MSMEG_3127	MSMEG_3127
-1.63111	6.74877	2.77996	0.0954634	0.708587	MSMEG_5268	MSMEG_5268
-1.62573	6.29861	2.24937	0.133682	0.708587	MSMEG_5581	MSMEG_5581
-1.6227	6.38939	2.21212	0.136943	0.708587	MSMEG_4133	MSMEG_4133
-1.61879	7.18419	3.69067	0.0547291	0.645165	MSMEG_6663	MSMEG_6663
-1.61839	7.78574	3.84219	0.0499895	0.638583	MSMEG_4219	MSMEG_4219
-1.61609	5.84032	1.49666	0.221197	0.72707	MSMEG_3273	MSMEG_3273
-1.6144	5.20063	0.989007	0.319995	0.763138	MSMEG_0116	MSMEG_0116
-1.60919	7.7936	4.26069	0.0390146	0.620939	MSMEG_3926	MSMEG_3926
-1.60789	6.01644	1.47684	0.224281	0.72707	MSMEG_5494	MSMEG_5494
-1.60107	6.08566	1.03869	0.308136	0.763138	MSMEG_5545	MSMEG_5545
-1.60039	6.79272	2.37568	0.123251	0.708587	dacB	MSMEG_6113
-1.59716	5.0789	0.775016	0.378678	0.810335	MSMEG_0254	MSMEG_0254
-1.59593	6.65062	2.39417	0.121801	0.708587	MSMEG_1169	MSMEG_1169
-1.595	5.856	1.3426	0.246586	0.738404	MSMEG_3651	MSMEG_3651
-1.59398	6.17682	1.77443	0.182847	0.708587	MSMEG_3533	MSMEG_3533
-1.59233	8.58317	5.40234	0.0201179	0.467132	efp	MSMEG_3035
-1.59056	10.44	11.5575	0.000675823	0.0720192	MSMEG_1112	MSMEG_1112
-1.58941	6.13617	1.63191	0.201452	0.72707	MSMEG_1636	MSMEG_1636
-1.58936	6.67713	3.10525	0.0780526	0.673217	MSMEG_4090	MSMEG_4090
-1.5883	5.87543	1.42904	0.231932	0.729334	MSMEG_0685	MSMEG_0685
-1.58667	7.54	3.45235	0.063174	0.645165	leuB	MSMEG_2379
-1.5859	6.00694	1.18599	0.276152	0.763138	MSMEG_5927	MSMEG_5927
-1.58269	12.3684	11.1476	0.000842647	0.0779369	MSMEG_0671	MSMEG_0671
-1.5818	5.25208	0.874614	0.34969	0.778775	MSMEG_1772	MSMEG_1772
-1.5761	8.69643	6.04657	0.0139402	0.38176	MSMEG_4085	MSMEG_4085
-1.57412	5.54773	1.39991	0.23675	0.73047	MSMEG_6836	MSMEG_6836
-1.56624	5.9002	1.30939	0.252517	0.745842	MSMEG_1073	MSMEG_1073
-1.56484	5.42919	0.831914	0.361729	0.793912	MSMEG_3002	MSMEG_3002
-1.56435	6.28983	1.7547	0.1853	0.710503	MSMEG_5970	MSMEG_5970
-1.56245	8.77265	5.809	0.0159517	0.421909	MSMEG_2416	MSMEG_2416
-1.56243	9.89884	10.2086	0.00139967	0.107206	MSMEG_1774	MSMEG_1774
-1.56048	4.94368	1.19869	0.273595	0.762891	MSMEG_6835	MSMEG_6835
-1.55923	5.56614	0.983493	0.321348	0.763138	MSMEG_2680	MSMEG_2680
-1.55335	5.47271	0.981857	0.321751	0.763138	MSMEG_6776	MSMEG_6776
-1.55009	5.88606	1.34277	0.246557	0.738404	MSMEG_5971	MSMEG_5971
-1.54478	6.26204	1.80403	0.179238	0.708587	MSMEG_0279	MSMEG_0279
-1.53572	7.10596	3.39288	0.0654904	0.653206	wrbA	MSMEG_2375
-1.53292	6.81878	2.42289	0.119587	0.708587	senX3	MSMEG_0936
-1.5323	6.3414	2.06364	0.150862	0.708587	MSMEG_5616	MSMEG_5616
-1.53068	9.05351	6.93267	0.00846884	0.291907	MSMEG_1950	MSMEG_1950
-1.52769	5.65238	1.0717	0.300573	0.763138	MSMEG_3404	MSMEG_3404
-1.52501	6.5295	1.44693	0.229033	0.728791	MSMEG_6017	MSMEG_6017
-1.52186	7.07053	1.47047	0.225284	0.72707	rpmA	MSMEG_4624
-1.52106	8.50769	5.01214	0.0251792	0.523001	MSMEG_3418	MSMEG_3418
-1.52075	6.95579	1.86392	0.172186	0.708587	MSMEG_1098	MSMEG_1098
-1.51992	5.22426	0.876026	0.349302	0.778397	MSMEG_6607	MSMEG_6607
-1.51552	5.74543	1.26061	0.261547	0.745842	MSMEG_3023	MSMEG_3023
-1.51515	6.7177	2.06103	0.151121	0.708587	MSMEG_5401	MSMEG_5401
-1.50993	5.65885	1.05377	0.304651	0.763138	MSMEG_1280	MSMEG_1280
-1.507	6.14121	1.50592	0.219774	0.72707	MSMEG_0564	MSMEG_0564
-1.5058	7.17316	3.26548	0.0707646	0.660212	MSMEG_1779	MSMEG_1779
-1.50343	5.87017	1.12848	0.288111	0.763138	MSMEG_2175	MSMEG_2175
-1.50094	6.90436	2.556	0.109889	0.708587	MSMEG_2592	MSMEG_2592
-1.50086	6.42442	1.62877	0.201885	0.72707	MSMEG_4182	MSMEG_4182
-1.49666	5.16468	0.962667	0.326525	0.765171	MSMEG_4003	MSMEG_4003
-1.49562	5.30054	0.782581	0.376362	0.808114	MSMEG_3546	MSMEG_3546
-1.48993	6.31517	0.906734	0.340992	0.769941	MSMEG_1387	MSMEG_1387
-1.48924	13.4764	9.36694	0.00221173	0.142657	glgX	MSMEG_6507
-1.4858	6.89162	2.3392	0.126168	0.708587	amt	MSMEG_2425
-1.485	5.6125	0.892261	0.344875	0.773525	MSMEG_4732	MSMEG_4732
-1.48398	8.23783	4.056	0.0440255	0.626123	MSMEG_3246	MSMEG_3246
-1.48237	5.43313	0.941694	0.331852	0.765294	MSMEG_0097	MSMEG_0097
-1.48071	6.37303	2.05798	0.151424	0.708587	MSMEG_3975	MSMEG_3975
-1.4807	7.25979	2.68827	0.101102	0.708587	MSMEG_6352	MSMEG_6352
-1.48039	7.50368	3.58189	0.0584245	0.645165	MSMEG_3416	MSMEG_3416
-1.47903	6.23323	1.61658	0.203581	0.72707	MSMEG_2660	MSMEG_2660
-1.47742	5.55611	0.799552	0.371236	0.801856	MSMEG_1661	MSMEG_1661
-1.47627	7.1138	3.20636	0.0733649	0.662245	coaD	MSMEG_2414
-1.47039	5.35046	0.802606	0.370324	0.801856	MSMEG_4123	MSMEG_4123
-1.46781	9.74675	8.66382	0.00324894	0.171251	MSMEG_0536	MSMEG_0536
-1.46442	7.08419	2.92311	0.0873319	0.703349	MSMEG_5774	MSMEG_5774
-1.46295	5.56146	0.619774	0.431139	0.817812	MSMEG_1806	MSMEG_1806
-1.46203	5.6625	0.623278	0.429839	0.817812	tynA	MSMEG_3847
-1.45956	8.0508	3.51248	0.0609202	0.645165	MSMEG_2045	MSMEG_2045
-1.45874	5.4158	0.618076	0.431771	0.817812	MSMEG_4974	MSMEG_4974
-1.45637	5.97971	1.05377	0.30465	0.763138	MSMEG_3541	MSMEG_3541
-1.45386	4.86802	0.809605	0.368246	0.800668	MSMEG_6274	MSMEG_6274
-1.45106	5.41208	1.03668	0.308605	0.763138	MSMEG_3330	MSMEG_3330
-1.44899	5.27503	0.620068	0.43103	0.817812	MSMEG_6521	MSMEG_6521
-1.4477	5.26047	0.620459	0.430884	0.817812	MSMEG_5191	MSMEG_5191
-1.44412	6.61392	1.81033	0.178481	0.708587	MSMEG_6539	MSMEG_6539
-1.44013	9.75363	8.28872	0.00399267	0.197698	MSMEG_1782	MSMEG_1782
-1.43825	6.92223	2.96429	0.0851346	0.696711	MSMEG_3928	MSMEG_3928
-1.43751	5.0052	0.840666	0.359215	0.792473	MSMEG_2598	MSMEG_2598
-1.4265	5.93482	0.888379	0.345926	0.775014	MSMEG_6524	MSMEG_6524
-1.42448	5.56391	0.585499	0.444172	0.817812	MSMEG_4971	MSMEG_4971
-1.42112	4.80665	0.785662	0.375424	0.807305	MSMEG_6420	MSMEG_6420
-1.42015	6.21177	0.665557	0.414613	0.817812	MSMEG_3437	MSMEG_3437
-1.42009	5.83218	0.856301	0.354785	0.784818	MSMEG_4489	MSMEG_4489
-1.41954	5.34363	0.887562	0.346148	0.775157	MSMEG_0015	MSMEG_0015
-1.41925	5.01657	0.630949	0.427015	0.817812	MSMEG_3374	MSMEG_3374
-1.41869	5.36848	0.832074	0.361683	0.793912	MSMEG_2693	MSMEG_2693
-1.41147	6.4694	1.69457	0.193012	0.720801	MSMEG_5959	MSMEG_5959
-1.41056	8.36094	4.22809	0.0397707	0.622863	MSMEG_3954	MSMEG_3954
-1.40941	11.3174	9.19431	0.00243022	0.151147	MSMEG_0537	MSMEG_0537
-1.40842	9.74386	7.75343	0.00536517	0.226725	glgB	MSMEG_4918
-1.40533	6.20907	1.48341	0.223254	0.72707	MSMEG_6280	MSMEG_6280
-1.40268	4.90436	0.637577	0.424597	0.817812	gcp	MSMEG_1580
-1.4008	9.30329	6.69365	0.00968137	0.314292	MSMEG_0343	MSMEG_0343
-1.39927	6.11195	1.13641	0.286422	0.763138	MSMEG_2947	MSMEG_2947
-1.39863	5.28706	0.369792	0.543123	0.859152	MSMEG_6457	MSMEG_6457
-1.3984	5.28488	0.369753	0.543145	0.859152	MSMEG_0301	MSMEG_0301
-1.39641	5.26663	0.369426	0.543323	0.859152	MSMEG_5203	MSMEG_5203
-1.39527	6.29288	1.21303	0.270744	0.757744	MSMEG_0862	MSMEG_0862
-1.39413	4.85022	0.641011	0.423353	0.817812	MSMEG_5107	MSMEG_5107
-1.39278	6.80797	1.89945	0.168152	0.708587	MSMEG_5374	MSMEG_5374
-1.39008	5.8425	1.04529	0.306604	0.763138	argR	MSMEG_3771
-1.3872	5.19099	0.368078	0.544059	0.859761	nagA	MSMEG_2119
-1.3867	5.55371	0.884884	0.346877	0.775725	MSMEG_4156	MSMEG_4156
-1.38444	6.92783	2.18157	0.139685	0.708587	MSMEG_5658	MSMEG_5658
-1.37591	4.73989	0.648271	0.420739	0.817812	MSMEG_1160	MSMEG_1160
-1.37218	7.54363	2.54331	0.110775	0.708587	MSMEG_4039	MSMEG_4039
-1.37209	7.59257	2.6399	0.104223	0.708587	MSMEG_6907	MSMEG_6907
-1.37121	6.97459	2.33197	0.126754	0.708587	MSMEG_0268	MSMEG_0268
-1.37092	5.14487	0.815544	0.366495	0.80039	MSMEG_3511	MSMEG_3511
-1.36806	7.14945	2.26575	0.132275	0.708587	MSMEG_6936	MSMEG_6936
-1.36431	5.03757	0.365356	0.545552	0.860456	MSMEG_5809	MSMEG_5809
-1.36304	5.54198	0.793982	0.372907	0.804574	MSMEG_6546	MSMEG_6546
-1.35484	6.4714	1.40514	0.235876	0.730217	cobA	MSMEG_2618
-1.35248	5.90607	0.790082	0.374084	0.806048	MSMEG_4401	MSMEG_4401
-1.34723	7.42773	2.71057	0.0996979	0.708587	MSMEG_2426	MSMEG_2426
-1.34649	6.58671	1.51967	0.217681	0.72707	MSMEG_1261	MSMEG_1261
-1.34543	6.66278	1.89277	0.168902	0.708587	MSMEG_1349	MSMEG_1349
-1.34502	4.92618	0.363371	0.546645	0.861255	MSMEG_5204	MSMEG_5204
-1.34473	5.81768	0.763275	0.382314	0.816247	MSMEG_1567	MSMEG_1567
-1.34288	4.91436	0.36316	0.546762	0.861255	MSMEG_3209	MSMEG_3209
-1.34228	9.02151	4.93763	0.0262871	0.532261	MSMEG_6656	MSMEG_6656
-1.34024	5.51884	0.660942	0.416235	0.817812	MSMEG_6510	MSMEG_6510
-1.33974	5.69873	0.668726	0.413504	0.817812	MSMEG_1678	MSMEG_1678
-1.33869	5.63232	0.775233	0.378612	0.810335	MSMEG_6608	MSMEG_6608
-1.33868	5.63429	0.775366	0.378571	0.810335	MSMEG_4117	MSMEG_4117
-1.33639	5.82936	0.800148	0.371058	0.801856	MSMEG_3359	MSMEG_3359
-1.33608	5.29316	0.672501	0.412189	0.817812	MSMEG_4553	MSMEG_4553
-1.33568	6.31412	1.17427	0.278537	0.763138	malQ	MSMEG_3673
-1.33527	4.87306	0.362424	0.547169	0.861342	MSMEG_0779	MSMEG_0779
-1.3309	6.74866	1.98829	0.158532	0.708587	MSMEG_1256	MSMEG_1256
-1.32951	6.38457	1.5804	0.208716	0.72707	MSMEG_3997	MSMEG_3997
-1.32947	5.19094	0.533375	0.465198	0.817812	MSMEG_6473	MSMEG_6473
-1.32501	5.01413	0.715578	0.397607	0.817812	MSMEG_6780	MSMEG_6780
-1.32399	6.57986	1.36659	0.242409	0.735474	MSMEG_5932	MSMEG_5932
-1.32296	4.97324	0.724148	0.394795	0.817812	MSMEG_3410	MSMEG_3410
-1.32289	5.69518	1.05581	0.304184	0.763138	MSMEG_0489	MSMEG_0489
-1.3219	5.06009	0.543915	0.460822	0.817812	MSMEG_3579	MSMEG_3579
-1.32067	6.70156	1.77201	0.183146	0.708587	MSMEG_1855	MSMEG_1855
-1.31461	5.44501	0.737135	0.390588	0.817812	MSMEG_4072	MSMEG_4072
-1.31266	5.5427	0.639285	0.423978	0.817812	MSMEG_3082	MSMEG_3082
-1.31202	8.01054	1.75085	0.185782	0.710932	MSMEG_4492	MSMEG_4492
-1.31137	5.47742	0.590894	0.442081	0.817812	MSMEG_6092	MSMEG_6092
-1.31108	5.97107	1.13332	0.287079	0.763138	MSMEG_6877	MSMEG_6877
-1.31101	5.36583	0.644838	0.421972	0.817812	MSMEG_0565	MSMEG_0565
-1.31028	10.521	7.94229	0.00483314	0.217358	MSMEG_6746	MSMEG_6746
-1.30784	5.98575	0.685862	0.407583	0.817812	hisG	MSMEG_4180
-1.30515	7.0329	2.43297	0.118821	0.708587	MSMEG_5109	MSMEG_5109
-1.30321	4.70464	0.359473	0.548805	0.861567	MSMEG_4666	MSMEG_4666
-1.3031	5.03832	0.690745	0.405919	0.817812	MSMEG_1501	MSMEG_1501
-1.30207	4.6987	0.359372	0.548861	0.861567	MSMEG_5335	MSMEG_5335
-1.30121	4.98037	0.703015	0.401781	0.817812	MSMEG_0514	MSMEG_0514
-1.30061	5.28004	0.504188	0.477673	0.817812	MSMEG_2048	MSMEG_2048
-1.29975	5.25085	0.505981	0.476891	0.817812	MSMEG_3172	MSMEG_3172
-1.29964	4.68604	0.359157	0.54898	0.861567	MSMEG_5181	MSMEG_5181
-1.29481	5.11164	0.517146	0.472069	0.817812	MSMEG_4832	MSMEG_4832
-1.2935	6.14531	0.991479	0.319391	0.763138	MSMEG_3831	MSMEG_3831
-1.29246	5.94674	0.961523	0.326813	0.765171	MSMEG_3477	MSMEG_3477
-1.292	7.74818	2.44886	0.117623	0.708587	MSMEG_0007	MSMEG_0007
-1.2871	6.67542	1.97131	0.160322	0.708587	MSMEG_2345	MSMEG_2345
-1.28155	7.5413	2.14807	0.142762	0.708587	MSMEG_2696	MSMEG_2696
-1.28087	4.81418	0.552714	0.457218	0.817812	MSMEG_2914	MSMEG_2914
-1.28061	6.31499	1.18858	0.275628	0.763138	MSMEG_2772	MSMEG_2772
-1.27605	4.56135	0.357143	0.550103	0.861976	MSMEG_0761	MSMEG_0761
-1.27257	5.60914	0.479469	0.488669	0.820467	MSMEG_4394	MSMEG_4394
-1.27255	5.54046	0.478067	0.489306	0.820621	MSMEG_6595	MSMEG_6595
-1.27229	5.47811	0.478022	0.489326	0.820621	MSMEG_4962	MSMEG_4962
-1.27187	5.74929	0.486438	0.485527	0.818169	MSMEG_6720	MSMEG_6720
-1.27182	5.75466	0.486804	0.485363	0.818169	MSMEG_1923	MSMEG_1923
-1.27041	5.29697	0.484202	0.486532	0.81846	MSMEG_1429	MSMEG_1429
-1.27018	8.31563	3.17564	0.0747562	0.662245	MSMEG_3333	MSMEG_3333
-1.26933	5.229	0.488777	0.48448	0.817812	MSMEG_3229	MSMEG_3229
-1.26932	10.6935	7.11218	0.00766122	0.279858	MSMEG_4916	MSMEG_4916
-1.26727	5.13518	0.628553	0.427894	0.817812	MSMEG_4001	MSMEG_4001
-1.26658	5.75581	0.62889	0.42777	0.817812	MSMEG_5094	MSMEG_5094
-1.2663	5.81146	0.608859	0.435225	0.817812	MSMEG_5586	MSMEG_5586
-1.266	5.06418	0.50433	0.47761	0.817812	MSMEG_0303	MSMEG_0303
-1.26407	5.73119	0.799772	0.37117	0.801856	MSMEG_3569	MSMEG_3569
-1.26396	4.97879	0.514574	0.473172	0.817812	MSMEG_2915	MSMEG_2915
-1.26258	4.92414	0.521805	0.47008	0.817812	MSMEG_4309	MSMEG_4309
-1.26208	6.39906	1.48519	0.222977	0.72707	MSMEG_5237	MSMEG_5237
-1.25737	4.73142	0.550656	0.458057	0.817812	MSMEG_6501	MSMEG_6501
-1.2562	8.69438	3.41471	0.0646299	0.650546	secF	MSMEG_2962
-1.25544	5.2827	0.469045	0.493433	0.823783	MSMEG_6869	MSMEG_6869
-1.25475	6.06935	0.94483	0.331048	0.765294	MSMEG_6649	MSMEG_6649
-1.25443	6.83412	1.12963	0.287866	0.763138	MSMEG_0368	MSMEG_0368
-1.25327	4.43388	0.35535	0.551106	0.862554	MSMEG_2922	MSMEG_2922
-1.25035	6.24032	0.911657	0.339685	0.769455	MSMEG_1646	MSMEG_1646
-1.2483	6.33326	1.21323	0.270704	0.757744	MSMEG_5739	MSMEG_5739
-1.24804	5.45022	0.749998	0.386485	0.817812	MSMEG_2933	MSMEG_2933
-1.24618	7.57955	1.03034	0.310089	0.763138	MSMEG_3811	MSMEG_3811
-1.24483	6.68529	1.56845	0.210444	0.72707	MSMEG_4770	MSMEG_4770
-1.24281	7.1533	2.10642	0.146695	0.708587	rluB	MSMEG_3740
-1.23669	5.77606	0.869056	0.351226	0.78082	MSMEG_6181	MSMEG_6181
-1.231	7.25779	2.01291	0.155978	0.708587	MSMEG_0807	MSMEG_0807
-1.23094	7.83477	2.61114	0.106128	0.708587	MSMEG_3323	MSMEG_3323
-1.22973	6.54727	1.4136	0.234472	0.729334	MSMEG_3320	MSMEG_3320
-1.22925	5.10196	0.468486	0.493691	0.823783	MSMEG_6688	MSMEG_6688
-1.22837	9.17169	4.79101	0.0286181	0.545465	MSMEG_3289	MSMEG_3289
-1.22682	8.1925	1.67333	0.195825	0.723932	MSMEG_3079	MSMEG_3079
-1.22409	5.7519	0.292775	0.588453	0.874455	MSMEG_0743	MSMEG_0743
-1.22359	6.96124	1.73032	0.188382	0.715682	MSMEG_2037	MSMEG_2037
-1.22163	5.8767	0.296969	0.585794	0.874455	pyc	MSMEG_6648
-1.2215	6.92709	1.75576	0.185167	0.710503	MSMEG_0043	MSMEG_0043
-1.21976	5.23796	0.29026	0.590059	0.874455	MSMEG_0407	MSMEG_0407
-1.21921	6.40009	0.921865	0.336995	0.767786	MSMEG_1260	MSMEG_1260
-1.21843	5.8714	0.674591	0.411464	0.817812	MSMEG_3456	MSMEG_3456
-1.21696	5.66582	0.64493	0.421939	0.817812	MSMEG_6432	MSMEG_6432
-1.21584	5.12458	0.29294	0.588348	0.874455	MSMEG_2097	MSMEG_2097
-1.21541	11.4061	6.81175	0.00906148	0.300131	MSMEG_2752	MSMEG_2752
-1.21522	7.13823	1.94374	0.163275	0.708587	MSMEG_5400	MSMEG_5400
-1.21483	5.09833	0.293693	0.587868	0.874455	MSMEG_5794	MSMEG_5794
-1.21414	6.48088	1.24186	0.265123	0.751586	MSMEG_0896	MSMEG_0896
-1.21402	7.82942	2.12821	0.144622	0.708587	MSMEG_0704	MSMEG_0704
-1.21252	5.04144	0.295479	0.586735	0.874455	MSMEG_0663	MSMEG_0663
-1.21192	9.95833	6.16535	0.0130343	0.37101	bfr	MSMEG_3564
-1.21095	5.65999	0.657359	0.417502	0.817812	MSMEG_1185	MSMEG_1185
-1.21085	7.57183	2.02945	0.154289	0.708587	recX	MSMEG_2724
-1.21061	6.2472	0.314389	0.575005	0.874455	MSMEG_0129	MSMEG_0129
-1.20869	4.95315	0.298626	0.58475	0.874455	MSMEG_1614	MSMEG_1614
-1.20861	4.95127	0.298698	0.584705	0.874455	MSMEG_5373	MSMEG_5373
-1.2084	7.04094	1.81408	0.178032	0.708587	MSMEG_1803	MSMEG_1803
-1.20631	4.90067	0.300684	0.583459	0.874455	MSMEG_6522	MSMEG_6522
-1.2052	4.87667	0.301666	0.582845	0.874455	MSMEG_2911	MSMEG_2911
-1.20348	6.75641	0.740735	0.389434	0.817812	MSMEG_5696	MSMEG_5696
-1.20275	5.90274	0.566229	0.451768	0.817812	MSMEG_5527	MSMEG_5527
-1.20239	5.65176	0.622847	0.429999	0.817812	MSMEG_5202	MSMEG_5202
-1.20119	5.74497	0.545248	0.460273	0.817812	MSMEG_0101	MSMEG_0101
-1.19993	4.76424	0.30655	0.57981	0.874455	MSMEG_4150	MSMEG_4150
-1.19869	6.20971	0.985647	0.320818	0.763138	MSMEG_6504	MSMEG_6504
-1.19639	4.68907	0.310017	0.577675	0.874455	MSMEG_3398	MSMEG_3398
-1.19605	4.68176	0.31036	0.577464	0.874455	MSMEG_5876	MSMEG_5876
-1.1952	4.66337	0.311228	0.576933	0.874455	MSMEG_1749	MSMEG_1749
-1.19318	9.70836	5.46135	0.0194496	0.4571	MSMEG_0939	MSMEG_0939
-1.19301	4.61576	0.313496	0.575548	0.874455	MSMEG_1761	MSMEG_1761
-1.19286	5.72825	0.668337	0.41364	0.817812	MSMEG_3039	MSMEG_3039
-1.19197	5.52181	0.583714	0.444867	0.817812	MSMEG_4537	MSMEG_4537
-1.19077	4.56594	0.315891	0.574093	0.874455	MSMEG_2907	MSMEG_2907
-1.18758	7.94826	2.33853	0.126222	0.708587	MSMEG_6574	MSMEG_6574
-1.18648	4.46574	0.320717	0.571182	0.874455	MSMEG_0481	MSMEG_0481
-1.18517	5.47206	0.273835	0.600775	0.874926	MSMEG_3807	MSMEG_3807
-1.18482	5.39656	0.274179	0.600547	0.874853	MSMEG_1209	MSMEG_1209
-1.18475	5.78836	0.279534	0.597012	0.874455	MSMEG_1123	MSMEG_1123
-1.18467	5.80129	0.279987	0.596715	0.874455	MSMEG_0333	MSMEG_0333
-1.18425	5.31292	0.27531	0.599796	0.874494	fmt	MSMEG_3064
-1.18421	5.30801	0.2754	0.599737	0.874494	MSMEG_1998	MSMEG_1998
-1.18401	5.28389	0.275878	0.599421	0.874494	MSMEG_2368	MSMEG_2368
-1.18393	5.2748	0.276073	0.599291	0.874494	MSMEG_2760	MSMEG_2760
-1.18376	5.25585	0.276507	0.599005	0.874455	MSMEG_0843	MSMEG_0843
-1.1837	7.2885	1.91958	0.165916	0.708587	mutM	MSMEG_2419
-1.18368	5.24733	0.276713	0.598868	0.874455	MSMEG_2934	MSMEG_2934
-1.18327	5.20608	0.277811	0.598144	0.874455	MSMEG_3041	MSMEG_3041
-1.18305	5.18539	0.27842	0.597743	0.874455	MSMEG_4352	MSMEG_4352
-1.18301	5.18214	0.278519	0.597678	0.874455	MSMEG_2800	MSMEG_2800
-1.18297	5.17804	0.278646	0.597595	0.874455	MSMEG_4619	MSMEG_4619
-1.18286	7.08083	1.30254	0.253761	0.745842	MSMEG_1279	MSMEG_1279
-1.18276	6.04191	0.290729	0.589759	0.874455	MSMEG_4349	MSMEG_4349
-1.18274	5.15772	0.279294	0.597169	0.874455	MSMEG_0891	MSMEG_0891
-1.18262	5.14684	0.279656	0.596931	0.874455	MSMEG_6830	MSMEG_6830
-1.18255	6.02261	0.570379	0.450115	0.817812	MSMEG_0052	MSMEG_0052
-1.18221	5.11181	0.280887	0.596125	0.874455	MSMEG_0326	MSMEG_0326
-1.18208	6.11195	0.294501	0.587355	0.874455	MSMEG_3512	MSMEG_3512
-1.18184	5.08211	0.282007	0.595394	0.874455	MSMEG_6523	MSMEG_6523
-1.1818	5.07898	0.282129	0.595314	0.874455	MSMEG_4977	MSMEG_4977
-1.18115	5.02889	0.284177	0.593981	0.874455	MSMEG_6474	MSMEG_6474
-1.18104	5.02046	0.284539	0.593747	0.874455	MSMEG_6558	MSMEG_6558
-1.18099	5.01716	0.284682	0.593654	0.874455	MSMEG_0023	MSMEG_0023
-1.18064	4.99158	0.285814	0.59292	0.874455	MSMEG_2492	MSMEG_2492
-1.18049	4.98066	0.28631	0.5926	0.874455	MSMEG_6027	MSMEG_6027
-1.18043	4.97623	0.286514	0.592468	0.874455	MSMEG_2832	MSMEG_2832
-1.18038	4.97241	0.28669	0.592354	0.874455	MSMEG_6050	MSMEG_6050
-1.17995	11.6123	6.40106	0.0114114	0.345301	MSMEG_6253	MSMEG_6253
-1.17937	4.90218	0.290081	0.590173	0.874455	MSMEG_4714	MSMEG_4714
-1.17937	4.90218	0.290081	0.590173	0.874455	MSMEG_6339	MSMEG_6339
-1.1791	4.88396	0.291003	0.589583	0.874455	MSMEG_5978	MSMEG_5978
-1.17896	9.5424	5.1597	0.0231256	0.503537	MSMEG_1788	MSMEG_1788
-1.17881	4.86445	0.292009	0.588941	0.874455	MSMEG_5615	MSMEG_5615
-1.1783	4.8302	0.293815	0.587791	0.874455	MSMEG_1110	MSMEG_1110
-1.178	4.81038	0.294882	0.587114	0.874455	MSMEG_4554	MSMEG_4554
-1.17787	4.80192	0.295341	0.586823	0.874455	MSMEG_6468	MSMEG_6468
-1.17768	4.78925	0.296036	0.586383	0.874455	MSMEG_3424	MSMEG_3424
-1.17763	4.78597	0.296216	0.58627	0.874455	MSMEG_1480	MSMEG_1480
-1.17751	4.77813	0.296649	0.585996	0.874455	MSMEG_1228	MSMEG_1228
-1.17745	4.77369	0.296895	0.585841	0.874455	MSMEG_4593	MSMEG_4593
-1.17743	4.77255	0.296958	0.585801	0.874455	MSMEG_0156	MSMEG_0156
-1.17705	4.74788	0.298337	0.584932	0.874455	MSMEG_4965	MSMEG_4965
-1.17678	7.06014	1.14288	0.285054	0.763138	MSMEG_5556	MSMEG_5556
-1.17654	4.71422	0.300246	0.583733	0.874455	MSMEG_6843	MSMEG_6843
-1.17622	4.6931	0.301457	0.582976	0.874455	MSMEG_3373	MSMEG_3373
-1.17604	4.68128	0.302139	0.58255	0.874455	MSMEG_4249	MSMEG_4249
-1.17598	5.52384	0.515996	0.472561	0.817812	MSMEG_3652	MSMEG_3652
-1.17574	8.29773	2.625	0.105205	0.708587	MSMEG_3248	MSMEG_3248
-1.17516	4.62305	0.30553	0.580441	0.874455	MSMEG_3311	MSMEG_3311
-1.17475	4.59567	0.307138	0.579447	0.874455	MSMEG_3993	MSMEG_3993
-1.17475	4.59567	0.307138	0.579447	0.874455	MSMEG_4013	MSMEG_4013
-1.17372	4.52541	0.311275	0.576904	0.874455	MSMEG_6832	MSMEG_6832
-1.17327	4.49418	0.313108	0.575784	0.874455	MSMEG_1271	MSMEG_1271
-1.17327	4.49418	0.313108	0.575784	0.874455	MSMEG_4002	MSMEG_4002
-1.17307	4.47953	0.313966	0.575262	0.874455	MSMEG_3827	MSMEG_3827
-1.17297	4.47278	0.31436	0.575022	0.874455	MSMEG_4071	MSMEG_4071
-1.17231	4.42442	0.317166	0.573321	0.874455	MSMEG_1613	MSMEG_1613
-1.17222	4.41744	0.317568	0.573078	0.874455	MSMEG_6211	MSMEG_6211
-1.17222	4.41744	0.317568	0.573078	0.874455	MSMEG_6506	MSMEG_6506
-1.17145	5.53842	0.425349	0.514286	0.840624	MSMEG_5962	MSMEG_5962
-1.16713	8.93594	3.59387	0.0580049	0.645165	MSMEG_1862	MSMEG_1862
-1.16413	8.90691	3.63286	0.056661	0.645165	MSMEG_0669	MSMEG_0669
-1.16349	7.09669	1.83076	0.17605	0.708587	MSMEG_0385	MSMEG_0385
-1.16289	8.90029	3.36249	0.0667092	0.653206	MSMEG_6356	MSMEG_6356
-1.15909	6.59493	1.26377	0.26095	0.745842	MSMEG_6730	MSMEG_6730
-1.15865	4.47784	0.306862	0.579617	0.874455	MSMEG_4549	MSMEG_4549
-1.15761	4.53929	0.302339	0.582425	0.874455	MSMEG_3974	MSMEG_3974
-1.15517	6.26944	0.956368	0.328113	0.765294	MSMEG_5017	MSMEG_5017
-1.1538	4.79595	0.458584	0.498293	0.826889	MSMEG_5985	MSMEG_5985
-1.15249	4.78999	0.28376	0.594252	0.874455	MSMEG_2796	MSMEG_2796
-1.14759	4.99701	0.269868	0.603425	0.877239	MSMEG_1493	MSMEG_1493
-1.14714	5.56698	0.486971	0.485288	0.818169	MSMEG_6600	MSMEG_6600
-1.14638	6.88347	1.44644	0.229112	0.728791	radA	MSMEG_6079
-1.14581	7.58696	2.03851	0.153373	0.708587	MSMEG_1780	MSMEG_1780
-1.14292	4.92863	0.431795	0.511116	0.838133	MSMEG_3730	MSMEG_3730
-1.14248	8.09768	2.02401	0.154843	0.708587	MSMEG_3235	MSMEG_3235
-1.14162	6.08215	0.810299	0.368041	0.800668	MSMEG_2070	MSMEG_2070
-1.14123	8.59648	2.73024	0.0984776	0.708587	MSMEG_2695	MSMEG_2695
-1.14006	7.21498	1.30103	0.254036	0.745842	MSMEG_3767	MSMEG_3767
-1.13869	5.57028	0.252892	0.615051	0.880606	MSMEG_5679	MSMEG_5679
-1.13813	5.7123	0.632759	0.426353	0.817812	MSMEG_3018	MSMEG_3018
-1.13727	9.48209	4.72677	0.0297062	0.548061	MSMEG_6768	MSMEG_6768
-1.13579	7.05096	1.49513	0.221434	0.72707	MSMEG_6137	MSMEG_6137
-1.13551	5.02927	0.414264	0.519819	0.844599	MSMEG_4163	MSMEG_4163
-1.13378	6.17058	0.431574	0.511224	0.838133	MSMEG_0580	MSMEG_0580
-1.13192	8.07262	2.22209	0.136062	0.708587	MSMEG_1285	MSMEG_1285
-1.13114	6.99438	1.65559	0.198212	0.72707	MSMEG_5537	MSMEG_5537
-1.13096	5.09821	0.403806	0.525136	0.848823	MSMEG_5738	MSMEG_5738
-1.12971	6.09081	0.419132	0.517376	0.842933	MSMEG_0889	MSMEG_0889
-1.12733	7.07203	1.72973	0.188457	0.715682	MSMEG_1351	MSMEG_1351
-1.12689	5.16704	0.394711	0.529839	0.851525	MSMEG_3379	MSMEG_3379
-1.12645	5.17491	0.393759	0.530336	0.851525	MSMEG_3312	MSMEG_3312
-1.12536	5.49455	0.491512	0.48326	0.817812	MSMEG_5674	MSMEG_5674
-1.12215	7.77125	1.93517	0.164206	0.708587	MSMEG_5496	MSMEG_5496
-1.12104	5.66074	0.582215	0.445453	0.817812	MSMEG_6778	MSMEG_6778
-1.1201	6.58357	0.935397	0.333474	0.766288	MSMEG_4431	MSMEG_4431
-1.11922	4.71499	0.444609	0.504913	0.8328	MSMEG_0474	MSMEG_0474
-1.11539	5.67902	0.375302	0.540134	0.858254	MSMEG_4358	MSMEG_4358
-1.11534	5.48996	0.371876	0.541989	0.859152	MSMEG_3809	MSMEG_3809
-1.11513	7.82505	1.69563	0.192872	0.720801	hypF	MSMEG_2273
-1.11475	5.55568	0.3716	0.542139	0.859152	MSMEG_3146	MSMEG_3146
-1.11421	5.60471	0.732517	0.392077	0.817812	MSMEG_3385	MSMEG_3385
-1.11389	6.28098	0.576205	0.447811	0.817812	MSMEG_3881	MSMEG_3881
-1.11075	9.18572	3.62085	0.0570713	0.645165	MSMEG_4217	MSMEG_4217
-1.1076	7.08767	1.43236	0.231392	0.729334	MSMEG_3647	MSMEG_3647
-1.10257	4.44901	0.283566	0.594378	0.874455	MSMEG_5994	MSMEG_5994
-1.10223	7.0857	1.40902	0.235231	0.729351	MSMEG_5837	MSMEG_5837
-1.10219	7.37936	1.33119	0.248605	0.742635	MSMEG_6078	MSMEG_6078
-1.10159	4.45723	0.282644	0.594978	0.874455	MSMEG_6680	MSMEG_6680
-1.10158	6.69751	0.87826	0.348688	0.777647	MSMEG_5220	MSMEG_5220
-1.09884	8.08952	1.88383	0.169912	0.708587	MSMEG_4296	MSMEG_4296
-1.09716	6.99302	1.52945	0.216207	0.72707	murQ	MSMEG_0193
-1.09705	7.07622	1.72666	0.18885	0.715682	MSMEG_4688	MSMEG_4688
-1.09315	4.52641	0.274819	0.600122	0.874494	MSMEG_4545	MSMEG_4545
-1.0914	13.9785	4.89958	0.0268724	0.536421	gyrB	MSMEG_0005
-1.09024	5.77354	0.652695	0.419159	0.817812	msrA	MSMEG_6477
-1.08983	6.11472	0.720659	0.395936	0.817812	MSMEG_4191	MSMEG_4191
-1.08946	4.55588	0.271468	0.602354	0.876428	MSMEG_6837	MSMEG_6837
-1.08884	7.58575	1.72098	0.18958	0.717622	MSMEG_6619	MSMEG_6619
-1.08792	6.59527	1.19468	0.274399	0.763138	rfbD	MSMEG_1825
-1.08766	4.5701	0.26985	0.603437	0.877239	MSMEG_1726	MSMEG_1726
-1.08741	7.62627	1.69421	0.193059	0.720801	pstA	MSMEG_5780
-1.08668	4.5778	0.268975	0.604025	0.877833	MSMEG_6548	MSMEG_6548
-1.08462	6.88955	1.2496	0.26364	0.748581	MSMEG_3253	MSMEG_3253
-1.08443	11.9808	5.30736	0.0212438	0.479378	glnA	MSMEG_4290
-1.08349	10.3385	5.26796	0.0217298	0.48418	MSMEG_5580	MSMEG_5580
-1.08217	4.61305	0.264976	0.606727	0.878617	xerD	MSMEG_3744
-1.08136	4.61934	0.264264	0.60721	0.878617	MSMEG_5183	MSMEG_5183
-1.0804	4.62682	0.26342	0.607785	0.878617	MSMEG_3857	MSMEG_3857
-1.08036	6.22628	0.650513	0.419937	0.817812	MSMEG_1529	MSMEG_1529
-1.07979	4.98765	0.380432	0.537378	0.855504	MSMEG_3917	MSMEG_3917
-1.07956	7.42705	1.62831	0.201949	0.72707	MSMEG_2390	MSMEG_2390
-1.07745	5.00552	0.376914	0.539265	0.857715	MSMEG_4729	MSMEG_4729
-1.07707	9.01613	3.06908	0.0798071	0.679192	MSMEG_4040	MSMEG_4040
-1.07697	7.63998	1.73453	0.187846	0.715682	MSMEG_0359	MSMEG_0359
-1.07543	4.66521	0.259105	0.61074	0.879376	MSMEG_3107	MSMEG_3107
-1.07369	4.67855	0.257617	0.611766	0.879376	MSMEG_4534	MSMEG_4534
-1.07314	5.89911	0.678991	0.409943	0.817812	MSMEG_5307	MSMEG_5307
-1.07264	4.65966	0.419049	0.517418	0.842933	MSMEG_1971	MSMEG_1971
-1.0726	4.68698	0.25668	0.612415	0.879467	MSMEG_4612	MSMEG_4612
-1.07228	7.67764	1.8056	0.17905	0.708587	MSMEG_3328	MSMEG_3328
-1.07135	7.1804	0.295091	0.586982	0.874455	fdhD	MSMEG_0165
-1.07126	4.66608	0.417115	0.518386	0.843668	groEL	MSMEG_1978
-1.07111	4.69845	0.255411	0.613295	0.880136	MSMEG_4407	MSMEG_4407
-1.07103	4.69905	0.255345	0.613341	0.880136	MSMEG_6786	MSMEG_6786
-1.06916	4.71344	0.253761	0.614444	0.880606	MSMEG_6716	MSMEG_6716
-1.06773	4.72444	0.252556	0.615286	0.880606	MSMEG_6135	MSMEG_6135
-1.06511	5.6592	0.513904	0.473461	0.817812	MSMEG_0701	MSMEG_0701
-1.06453	6.53248	1.09097	0.296267	0.763138	MSMEG_1611	MSMEG_1611
-1.06281	6.53105	0.681218	0.409176	0.817812	MSMEG_3119	MSMEG_3119
-1.06231	4.76617	0.248047	0.618458	0.88334	MSMEG_2047	MSMEG_2047
-1.06104	8.59519	2.21458	0.136725	0.708587	MSMEG_5526	MSMEG_5526
-1.05869	7.05041	1.30458	0.25339	0.745842	MSMEG_5617	MSMEG_5617
-1.05821	5.7067	0.337368	0.561358	0.871643	bioB	MSMEG_3194
-1.05745	5.14831	0.445554	0.50446	0.832614	MSMEG_5742	MSMEG_5742
-1.05708	6.02143	0.628307	0.427985	0.817812	xseA	MSMEG_5226
-1.057	4.80743	0.243698	0.621552	0.883899	MSMEG_1704	MSMEG_1704
-1.05589	8.62526	2.45756	0.116974	0.708587	MSMEG_2415	MSMEG_2415
-1.05555	4.81881	0.24252	0.622397	0.884178	MSMEG_4523	MSMEG_4523
-1.05544	4.56118	0.256549	0.612505	0.879467	MSMEG_2883	MSMEG_2883
-1.05544	4.81966	0.242432	0.62246	0.884178	MSMEG_2260	MSMEG_2260
-1.05193	5.233	0.341011	0.559252	0.869474	MSMEG_4501	MSMEG_4501
-1.05072	5.24641	0.339438	0.560159	0.870333	MSMEG_3252	MSMEG_3252
-1.05046	6.47419	0.992516	0.319138	0.763138	MSMEG_1066	MSMEG_1066
-1.05005	9.22427	3.33228	0.0679449	0.654941	asnB	MSMEG_2594
-1.05002	7.41207	1.70318	0.191884	0.720801	MSMEG_4739	MSMEG_4739
-1.04862	4.87376	0.236978	0.626402	0.885435	MSMEG_1596	MSMEG_1596
-1.0484	5.76084	0.623393	0.429797	0.817812	MSMEG_3336	MSMEG_3336
-1.04779	10.7479	4.99398	0.0254446	0.524074	sucB	MSMEG_4283
-1.04565	7.07974	1.31508	0.251488	0.745842	MSMEG_6543	MSMEG_6543
-1.04563	5.2941	0.420852	0.516519	0.842365	MSMEG_5605	MSMEG_5605
-1.04535	8.53275	2.31242	0.128357	0.708587	MSMEG_0948	MSMEG_0948
-1.04511	4.90213	0.234222	0.628415	0.885435	MSMEG_3322	MSMEG_3322
-1.04495	4.90345	0.234095	0.628508	0.885435	MSMEG_3710	MSMEG_3710
-1.04417	4.9098	0.233489	0.628953	0.885447	MSMEG_0601	MSMEG_0601
-1.04185	5.36471	0.328374	0.566623	0.874455	MSMEG_6346	MSMEG_6346
-1.04019	6.53884	1.03516	0.308959	0.763138	MSMEG_0732	MSMEG_0732
-1.03929	5.95197	0.565248	0.452161	0.817812	MSMEG_1425	MSMEG_1425
-1.03713	5.47823	0.405133	0.524456	0.848315	MSMEG_4691	MSMEG_4691
-1.03559	5.51997	0.321926	0.570458	0.874455	MSMEG_5931	MSMEG_5931
-1.03412	6.43727	0.719584	0.396289	0.817812	MSMEG_5708	MSMEG_5708
-1.03374	4.99794	0.225518	0.634871	0.888167	MSMEG_1921	MSMEG_1921
-1.03276	6.42918	0.595367	0.440358	0.817812	MSMEG_3708	MSMEG_3708
-1.03271	5.84972	0.555152	0.456227	0.817812	MSMEG_1542	MSMEG_1542
-1.02886	5.04171	0.221889	0.637608	0.88955	MSMEG_6742	MSMEG_6742
-1.02881	6.06847	0.457856	0.498634	0.826915	MSMEG_0346	MSMEG_0346
-1.0282	4.87434	0.360055	0.548481	0.861567	MSMEG_4710	MSMEG_4710
-1.02713	4.6785	0.383571	0.535704	0.854629	MSMEG_3726	MSMEG_3726
-1.02682	5.06064	0.220394	0.638744	0.889909	MSMEG_0414	MSMEG_0414
-1.02652	6.88542	1.01757	0.313107	0.763138	MSMEG_6142	MSMEG_6142
-1.02652	5.06354	0.220168	0.638916	0.889909	MSMEG_2687	MSMEG_2687
-1.02494	7.55391	1.54606	0.213729	0.72707	folA	MSMEG_2671
-1.02386	4.72323	0.23471	0.628057	0.885435	MSMEG_0605	MSMEG_0605
-1.02321	5.94413	0.597679	0.439473	0.817812	rpsR	MSMEG_6895
-1.02148	6.34805	0.706605	0.400581	0.817812	ftsY	MSMEG_2424
-1.02141	5.11321	0.216484	0.641736	0.891524	MSMEG_1001	MSMEG_1001
-1.02137	5.1136	0.216456	0.641758	0.891524	MSMEG_2575	MSMEG_2575
-1.02068	5.1206	0.215964	0.642137	0.891615	MSMEG_4479	MSMEG_4479
-1.019	9.40076	3.42856	0.0640898	0.64915	MSMEG_1252	MSMEG_1252
-1.01838	5.14437	0.214344	0.643388	0.892947	rpmJ	MSMEG_1520
-1.01605	6.1507	0.535736	0.464212	0.817812	MSMEG_0603	MSMEG_0603
-1.01578	9.33858	3.44665	0.0633919	0.646044	ndh	MSMEG_3621
-1.01076	6.70612	0.885209	0.346788	0.775725	nrdR	MSMEG_2743
-1.00836	4.8012	0.224641	0.63553	0.888602	MSMEG_1159	MSMEG_1159
-1.00806	5.12044	0.31974	0.571769	0.874455	MSMEG_4046	MSMEG_4046
-1.008	5.26752	0.207287	0.648906	0.896164	MSMEG_3515	MSMEG_3515
-1.00608	6.59997	0.729026	0.393207	0.817812	hemL	MSMEG_0969
-1.00517	8.51864	1.87457	0.170965	0.708587	MSMEG_0947	MSMEG_0947
-1.00379	7.49364	1.52598	0.216728	0.72707	MSMEG_5422	MSMEG_5422
-1.00329	6.91503	0.951888	0.329249	0.765294	MSMEG_1757	MSMEG_1757
-1.00192	5.3631	0.203481	0.65193	0.897766	MSMEG_4975	MSMEG_4975
-0.995923	5.60564	0.20124	0.653726	0.898644	MSMEG_4566	MSMEG_4566
-0.994396	6.03161	0.471852	0.492143	0.822812	MSMEG_2652	MSMEG_2652
-0.993216	7.0656	1.29152	0.25578	0.745842	MSMEG_3889	MSMEG_3889
-0.992288	6.76045	0.951721	0.329291	0.765294	MSMEG_5219	MSMEG_5219
-0.991425	8.3399	1.82896	0.176263	0.708587	MSMEG_0684	MSMEG_0684
-0.989175	10.6521	4.20639	0.0402825	0.622896	MSMEG_1601	MSMEG_1601
-0.98668	5.67299	0.451182	0.501781	0.830148	MSMEG_1295	MSMEG_1295
-0.986523	7.02353	1.21264	0.270822	0.757744	dxr	MSMEG_2578
-0.983602	7.36889	1.27949	0.258005	0.745842	MSMEG_2974	MSMEG_2974
-0.983489	5.13857	0.307245	0.579381	0.874455	MSMEG_2084	MSMEG_2084
-0.98339	7.79226	1.14229	0.285179	0.763138	MSMEG_4239	MSMEG_4239
-0.982893	7.49513	1.41646	0.233998	0.729334	MSMEG_5187	MSMEG_5187
-0.982388	4.68459	0.351893	0.553049	0.863665	MSMEG_6345	MSMEG_6345
-0.982144	5.07224	0.323538	0.569494	0.874455	MSMEG_2990	MSMEG_2990
-0.981989	7.27061	1.04084	0.307637	0.763138	MSMEG_1708	MSMEG_1708
-0.98182	5.90177	0.610036	0.434782	0.817812	MSMEG_3218	MSMEG_3218
-0.981438	10.772	4.41271	0.0356823	0.596978	MSMEG_6127	MSMEG_6127
-0.981194	7.33304	1.3519	0.244958	0.735827	MSMEG_6416	MSMEG_6416
-0.980352	4.94541	0.207461	0.648769	0.896164	MSMEG_6001	MSMEG_6001
-0.976311	5.84282	0.428661	0.512653	0.839353	MSMEG_4146	MSMEG_4146
-0.974011	12.7147	4.16006	0.0413986	0.622896	MSMEG_3902	MSMEG_3902
-0.973149	9.5169	3.25255	0.0713245	0.660212	MSMEG_3360	MSMEG_3360
-0.972656	5.62244	0.298605	0.584763	0.874455	MSMEG_1149	MSMEG_1149
-0.971956	4.87979	0.322935	0.569854	0.874455	MSMEG_4093	MSMEG_4093
-0.971153	8.02072	1.58642	0.207851	0.72707	MSMEG_5538	MSMEG_5538
-0.971084	5.47992	0.296686	0.585972	0.874455	MSMEG_4577	MSMEG_4577
-0.969935	5.00188	0.201395	0.653601	0.898644	MSMEG_6188	MSMEG_6188
-0.969351	6.41983	0.463601	0.495952	0.825521	MSMEG_6599	MSMEG_6599
-0.966869	5.01898	0.199643	0.655013	0.89937	MSMEG_3492	MSMEG_3492
-0.966067	7.11552	1.2368	0.266099	0.752259	MSMEG_0449	MSMEG_0449
-0.966005	8.91754	2.30318	0.129123	0.708587	rpsJ	MSMEG_1435
-0.965242	8.81687	2.2979	0.129562	0.708587	MSMEG_6087	MSMEG_6087
-0.964598	4.90822	0.31545	0.57436	0.874455	MSMEG_1336	MSMEG_1336
-0.964269	7.77939	1.37425	0.241094	0.735434	MSMEG_3255	MSMEG_3255
-0.963325	7.52245	1.29432	0.255264	0.745842	MSMEG_2778	MSMEG_2778
-0.961613	5.62781	0.365425	0.545514	0.860456	rph	MSMEG_4901
-0.96056	5.43129	0.364718	0.545903	0.860732	MSMEG_6665	MSMEG_6665
-0.960007	9.47691	3.25623	0.0711648	0.660212	MSMEG_2038	MSMEG_2038
-0.959891	5.3529	0.282515	0.595062	0.874455	cobM	MSMEG_3877
-0.958672	5.47776	0.287794	0.591643	0.874455	MSMEG_0553	MSMEG_0553
-0.957388	4.9896	0.38815	0.533279	0.853227	MSMEG_4297	MSMEG_4297
-0.954849	6.99933	1.27381	0.259065	0.745842	MSMEG_3940	MSMEG_3940
-0.954336	5.43852	0.277376	0.598431	0.874455	MSMEG_0187	MSMEG_0187
-0.953476	5.09727	0.192173	0.661118	0.904045	MSMEG_3192	MSMEG_3192
-0.953199	13.1232	3.90716	0.0480921	0.632598	MSMEG_5089	MSMEG_5089
-0.951353	6.17821	0.490535	0.483695	0.817812	MSMEG_1823	MSMEG_1823
-0.951043	6.10573	0.401545	0.526298	0.849678	MSMEG_0978	MSMEG_0978
-0.94948	7.87597	1.53312	0.215656	0.72707	MSMEG_0111	MSMEG_0111
-0.949065	7.97674	1.36708	0.242325	0.735474	greA	MSMEG_5263
-0.941859	6.60011	0.810096	0.368101	0.800668	proB	MSMEG_4621
-0.940148	6.5712	0.813774	0.367016	0.800626	MSMEG_0764	MSMEG_0764
-0.935885	10.3259	3.59388	0.0580045	0.645165	rplC	MSMEG_1436
-0.935648	6.56299	0.86466	0.352447	0.782117	MSMEG_0455	MSMEG_0455
-0.930607	5.88572	0.459265	0.497974	0.826889	MSMEG_0634	MSMEG_0634
-0.928247	7.1999	1.04819	0.305935	0.763138	MSMEG_4483	MSMEG_4483
-0.927279	10.2538	3.79641	0.0513738	0.638583	MSMEG_5968	MSMEG_5968
-0.925012	6.24231	0.566968	0.451473	0.817812	MSMEG_3407	MSMEG_3407
-0.921191	7.892	1.35872	0.243771	0.735474	MSMEG_5071	MSMEG_5071
-0.921073	5.34177	0.175531	0.675246	0.911109	MSMEG_0966	MSMEG_0966
-0.918273	5.42822	0.38037	0.537411	0.855504	MSMEG_6670	MSMEG_6670
-0.915393	7.17674	1.12799	0.288215	0.763138	ligB	MSMEG_2277
-0.913768	6.1559	0.386327	0.534242	0.853692	MSMEG_3026	MSMEG_3026
-0.913576	7.8073	1.31306	0.251853	0.745842	MSMEG_3747	MSMEG_3747
-0.911259	10.2639	3.49934	0.061405	0.645165	MSMEG_0032	MSMEG_0032
-0.909006	8.2541	1.61093	0.204374	0.72707	MSMEG_3713	MSMEG_3713
-0.907357	8.11132	1.47221	0.225009	0.72707	MSMEG_4194	MSMEG_4194
-0.903162	6.29407	0.638093	0.42441	0.817812	MSMEG_0280	MSMEG_0280
-0.902036	5.40463	0.358051	0.549596	0.861567	MSMEG_1880	MSMEG_1880
-0.898169	5.85669	0.4729	0.491663	0.82257	MSMEG_1207	MSMEG_1207
-0.897862	5.55596	0.397059	0.528618	0.851203	MSMEG_0352	MSMEG_0352
-0.89693	8.08304	1.40389	0.236084	0.730217	MSMEG_2347	MSMEG_2347
-0.8964	5.6371	0.352454	0.552733	0.863665	MSMEG_3545	MSMEG_3545
-0.89633	6.38804	0.484653	0.486329	0.81846	MSMEG_6390	MSMEG_6390
-0.894461	5.56375	0.304521	0.581067	0.874455	MSMEG_2610	MSMEG_2610
-0.888906	7.06177	0.971744	0.324255	0.765171	MSMEG_1876	MSMEG_1876
-0.887832	8.80344	1.97074	0.160383	0.708587	MSMEG_0775	MSMEG_0775
-0.88715	8.05314	1.36313	0.243007	0.735474	MSMEG_1249	MSMEG_1249
-0.886465	9.54744	3.02621	0.0819419	0.689237	MSMEG_1131	MSMEG_1131
-0.885199	5.89909	0.47667	0.489941	0.82081	MSMEG_1789	MSMEG_1789
-0.882988	6.78512	0.950334	0.329644	0.765294	MSMEG_2661	MSMEG_2661
-0.878225	6.63569	0.715004	0.397796	0.817812	lppH	MSMEG_4598
-0.878068	5.52717	0.290945	0.589621	0.874455	MSMEG_4515	MSMEG_4515
-0.877386	8.94502	2.02642	0.154597	0.708587	MSMEG_4741	MSMEG_4741
-0.876137	6.05788	0.475062	0.490674	0.821477	MSMEG_0631	MSMEG_0631
-0.87593	7.24327	0.872418	0.350296	0.77946	MSMEG_3531	MSMEG_3531
-0.873041	6.87467	0.589351	0.442678	0.817812	MSMEG_5924	MSMEG_5924
-0.872341	10.5974	3.47876	0.0621733	0.645165	MSMEG_1350	MSMEG_1350
-0.872283	7.92855	0.462723	0.49636	0.825907	MSMEG_0242	MSMEG_0242
-0.870785	9.77336	3.01583	0.0824679	0.689237	sdaA	MSMEG_3440
-0.86725	5.46323	0.292938	0.588349	0.874455	MSMEG_5146	MSMEG_5146
-0.865996	5.56153	0.229875	0.631621	0.888167	MSMEG_5914	MSMEG_5914
-0.865009	5.5221	0.371008	0.542461	0.859152	MSMEG_2149	MSMEG_2149
-0.864593	7.23654	0.875881	0.349342	0.778397	MSMEG_3682	MSMEG_3682
-0.863274	8.32641	1.35094	0.245126	0.735827	MSMEG_4917	MSMEG_4917
-0.860521	7.29947	0.661081	0.416186	0.817812	MSMEG_3128	MSMEG_3128
-0.859765	7.78068	1.17001	0.279409	0.763138	guaA	MSMEG_1610
-0.859189	8.17066	1.27944	0.258015	0.745842	MSMEG_4668	MSMEG_4668
-0.853433	7.44368	0.947905	0.330263	0.765294	MSMEG_6500	MSMEG_6500
-0.85329	7.31611	1.13182	0.287399	0.763138	MSMEG_1680	MSMEG_1680
-0.850135	9.38839	2.565	0.109265	0.708587	MSMEG_3942	MSMEG_3942
-0.847382	10.2957	3.183	0.0744204	0.662245	iscS	MSMEG_1242
-0.846888	7.05706	0.931253	0.334547	0.767048	cysS	MSMEG_4189
-0.845491	10.7963	3.21597	0.0729351	0.661308	MSMEG_1248	MSMEG_1248
-0.843489	5.96818	0.382491	0.536279	0.854629	MSMEG_0206	MSMEG_0206
-0.842917	8.31717	1.41682	0.233939	0.729334	hybA	MSMEG_2262
-0.8425	5.68276	0.287466	0.591854	0.874455	MSMEG_1570	MSMEG_1570
-0.841007	5.89357	0.295581	0.586671	0.874455	MSMEG_5039	MSMEG_5039
-0.840658	5.84442	0.291612	0.589194	0.874455	MSMEG_2130	MSMEG_2130
-0.840276	9.90788	2.70369	0.100129	0.708587	MSMEG_4902	MSMEG_4902
-0.835572	8.39949	1.39427	0.237697	0.731443	moxR	MSMEG_3147
-0.83445	7.07746	0.623056	0.429921	0.817812	MSMEG_0867	MSMEG_0867
-0.833694	6.64304	0.369702	0.543172	0.859152	MSMEG_1632	MSMEG_1632
-0.832669	5.99553	0.417406	0.51824	0.843668	MSMEG_1262	MSMEG_1262
-0.832177	5.78764	0.225707	0.63473	0.888167	MSMEG_2900	MSMEG_2900
-0.830002	5.33161	0.221803	0.637674	0.88955	MSMEG_6348	MSMEG_6348
-0.829667	8.29523	1.34434	0.246281	0.738391	MSMEG_4082	MSMEG_4082
-0.828481	11.0714	3.18555	0.0743043	0.662245	MSMEG_1773	MSMEG_1773
-0.82777	8.53236	1.3532	0.244731	0.735827	MSMEG_5792	MSMEG_5792
-0.823956	6.97421	0.649302	0.42037	0.817812	pgl	MSMEG_3099
-0.821609	5.76105	0.263411	0.607791	0.878617	MSMEG_4366	MSMEG_4366
-0.819761	5.96972	0.328295	0.56667	0.874455	dapB	MSMEG_5286
-0.819341	5.50937	0.218584	0.640125	0.890724	MSMEG_4586	MSMEG_4586
-0.817436	9.62858	2.55774	0.109768	0.708587	MSMEG_0147	MSMEG_0147
-0.814884	7.34639	0.826489	0.363299	0.795751	MSMEG_0646	MSMEG_0646
-0.81178	6.72305	0.5465	0.459758	0.817812	MSMEG_4912	MSMEG_4912
-0.811701	6.06538	0.303029	0.581994	0.874455	MSMEG_2798	MSMEG_2798
-0.810304	5.9007	0.21855	0.640151	0.890724	MSMEG_2771	MSMEG_2771
-0.8052	9.43737	2.2981	0.129545	0.708587	MSMEG_4059	MSMEG_4059
-0.804742	7.45903	0.912858	0.339367	0.769455	leuC	MSMEG_2387
-0.802531	12.8392	2.81302	0.093515	0.708587	MSMEG_0538	MSMEG_0538
-0.801372	8.68485	1.44971	0.228585	0.728791	MSMEG_3748	MSMEG_3748
-0.799639	8.17842	1.03348	0.309353	0.763138	MSMEG_1684	MSMEG_1684
-0.796993	10.0042	2.60187	0.106751	0.708587	mfd	MSMEG_5423
-0.796845	8.79415	1.53479	0.215407	0.72707	MSMEG_6921	MSMEG_6921
-0.796368	10.3407	2.84695	0.0915604	0.708587	katA	MSMEG_6232
-0.794205	8.38794	1.2995	0.254315	0.745842	MSMEG_5091	MSMEG_5091
-0.79408	5.70151	0.26293	0.608119	0.878833	MSMEG_4633	MSMEG_4633
-0.793496	5.28163	0.209775	0.646947	0.89596	MSMEG_1784	MSMEG_1784
-0.792774	6.8296	0.619812	0.431125	0.817812	MSMEG_5002	MSMEG_5002
-0.789212	6.84144	0.687929	0.406878	0.817812	MSMEG_0798	MSMEG_0798
-0.78754	6.47057	0.514656	0.473137	0.817812	MSMEG_0930	MSMEG_0930
-0.78627	6.34802	0.393076	0.530693	0.851819	MSMEG_0045	MSMEG_0045
-0.786049	6.70899	0.337609	0.561218	0.871643	MSMEG_4963	MSMEG_4963
-0.784698	5.17134	0.254906	0.613646	0.880136	MSMEG_2299	MSMEG_2299
-0.784494	9.34489	2.05685	0.151536	0.708587	era	MSMEG_4493
-0.78351	5.4466	0.190212	0.662744	0.904272	MSMEG_6020	MSMEG_6020
-0.782859	6.51537	0.553818	0.456769	0.817812	MSMEG_2046	MSMEG_2046
-0.782489	5.55297	0.197081	0.657091	0.900709	MSMEG_2789	MSMEG_2789
-0.781402	5.73715	0.199917	0.654792	0.89937	MSMEG_0049	MSMEG_0049
-0.781314	7.5428	0.815097	0.366626	0.80039	MSMEG_1397	MSMEG_1397
-0.780395	5.30558	0.292483	0.588638	0.874455	MSMEG_0148	MSMEG_0148
-0.777212	5.90964	0.291351	0.589361	0.874455	MSMEG_2556	MSMEG_2556
-0.77462	8.46066	1.23066	0.26729	0.754755	MSMEG_3419	MSMEG_3419
-0.773069	5.82687	0.245751	0.620088	0.88334	MSMEG_5105	MSMEG_5105
-0.772003	7.09208	0.793251	0.373128	0.804695	MSMEG_2142	MSMEG_2142
-0.771618	5.99904	0.262115	0.608675	0.878859	MSMEG_3426	MSMEG_3426
-0.770524	7.11885	0.831909	0.36173	0.793912	MSMEG_5188	MSMEG_5188
-0.769705	8.63048	1.19674	0.273986	0.763138	MSMEG_0929	MSMEG_0929
-0.769636	5.65971	0.236399	0.626824	0.885435	MSMEG_2192	MSMEG_2192
-0.766882	6.91356	0.633073	0.426238	0.817812	MSMEG_5458	MSMEG_5458
-0.766713	6.13069	0.388091	0.533311	0.853227	MSMEG_3024	MSMEG_3024
-0.765801	4.96907	0.208781	0.647729	0.89596	MSMEG_0490	MSMEG_0490
-0.763145	10.4884	2.6705	0.102237	0.708587	MSMEG_3332	MSMEG_3332
-0.761084	6.19922	0.359602	0.548733	0.861567	MSMEG_0438	MSMEG_0438
-0.759113	10.6615	2.65289	0.103375	0.708587	trxB	MSMEG_6933
-0.75818	5.65979	0.228944	0.632312	0.888167	MSMEG_2923	MSMEG_2923
-0.757417	5.17663	0.250325	0.616851	0.881575	MSMEG_1977	MSMEG_1977
-0.75651	8.24599	0.88009	0.348186	0.776882	MSMEG_5080	MSMEG_5080
-0.755316	8.97843	1.65284	0.198585	0.72707	MSMEG_4141	MSMEG_4141
-0.753573	5.62597	0.181994	0.669669	0.907329	MSMEG_2606	MSMEG_2606
-0.752549	7.74475	0.96616	0.32565	0.765171	MSMEG_0351	MSMEG_0351
-0.751389	5.85614	0.308354	0.578697	0.874455	MSMEG_6541	MSMEG_6541
-0.750842	7.28619	0.257491	0.611854	0.879376	MSMEG_0854	MSMEG_0854
-0.750258	4.69537	0.221066	0.638233	0.889909	MSMEG_1962	MSMEG_1962
-0.746958	7.4318	0.860534	0.353598	0.783533	rpsF	MSMEG_6897
-0.745674	6.44985	0.387306	0.533725	0.853333	MSMEG_4913	MSMEG_4913
-0.743008	6.58322	0.437525	0.508326	0.83646	MSMEG_0737	MSMEG_0737
-0.740751	5.7228	0.226164	0.634387	0.888167	MSMEG_5979	MSMEG_5979
-0.740687	6.81533	0.383682	0.535645	0.854629	MSMEG_0053	MSMEG_0053
-0.738708	5.78797	0.227805	0.633161	0.888167	MSMEG_2946	MSMEG_2946
-0.737824	5.37202	0.216378	0.641818	0.891524	fabG	MSMEG_5903
-0.737613	11.5207	2.47333	0.115806	0.708587	MSMEG_4260	MSMEG_4260
-0.736065	6.39685	0.455212	0.499877	0.828435	MSMEG_6739	MSMEG_6739
-0.735332	5.07475	0.235201	0.627699	0.885435	MSMEG_5993	MSMEG_5993
-0.735187	5.46898	0.246796	0.619345	0.88334	MSMEG_6358	MSMEG_6358
-0.734809	5.48641	0.246277	0.619713	0.88334	MSMEG_3566	MSMEG_3566
-0.731307	5.62302	0.205869	0.650029	0.896326	MSMEG_1396	MSMEG_1396
-0.729211	7.84301	0.85931	0.353941	0.783533	MSMEG_6307	MSMEG_6307
-0.727343	5.991	0.229381	0.631988	0.888167	pqqB	MSMEG_3724
-0.723133	7.44665	0.699936	0.402813	0.817812	MSMEG_0848	MSMEG_0848
-0.720559	6.19222	0.284679	0.593655	0.874455	MSMEG_3688	MSMEG_3688
-0.720239	5.86195	0.251589	0.615963	0.880606	MSMEG_3377	MSMEG_3377
-0.719199	6.04851	0.322232	0.570275	0.874455	MSMEG_5069	MSMEG_5069
-0.718544	5.74635	0.210349	0.646498	0.89596	thiO	MSMEG_0791
-0.716988	5.65542	0.206643	0.649415	0.896232	MSMEG_3421	MSMEG_3421
-0.716035	6.61062	0.468397	0.493732	0.823783	MSMEG_6928	MSMEG_6928
-0.712997	6.56508	0.329531	0.565941	0.874455	ampC	MSMEG_3978
-0.712776	6.77969	0.404989	0.52453	0.848315	MSMEG_2528	MSMEG_2528
-0.712655	9.65989	1.80808	0.178752	0.708587	ilvA	MSMEG_3183
-0.711971	8.4532	1.01002	0.314907	0.763138	MSMEG_6128	MSMEG_6128
-0.711782	6.15036	0.287776	0.591654	0.874455	cobF	MSMEG_5548
-0.71047	9.59721	1.88499	0.169781	0.708587	MSMEG_0387	MSMEG_0387
-0.705211	6.71686	0.618015	0.431794	0.817812	MSMEG_5271	MSMEG_5271
-0.704258	7.19334	0.642078	0.422967	0.817812	MSMEG_1639	MSMEG_1639
-0.702588	6.71484	0.335847	0.562242	0.871791	rnhB	MSMEG_2442
-0.702295	6.81796	0.391187	0.531682	0.852833	MSMEG_3490	MSMEG_3490
-0.701957	7.30095	0.54866	0.458873	0.817812	MSMEG_1826	MSMEG_1826
-0.70119	9.12569	1.41983	0.233443	0.729334	MSMEG_3538	MSMEG_3538
-0.69778	12.9141	2.10405	0.146922	0.708587	rpoB	MSMEG_1367
-0.696159	8.22295	0.866235	0.352009	0.781498	moxR	MSMEG_6612
-0.695402	5.39321	0.156496	0.692406	0.919214	ruvA	MSMEG_2944
-0.694859	5.32058	0.157691	0.691295	0.918852	MSMEG_2413	MSMEG_2413
-0.693779	5.98581	0.166441	0.683298	0.915698	MSMEG_6098	MSMEG_6098
-0.691653	5.38003	0.199447	0.655171	0.89937	MSMEG_4060	MSMEG_4060
-0.69002	7.97599	0.774349	0.378884	0.810335	MSMEG_4596	MSMEG_4596
-0.689405	4.76878	0.182249	0.669451	0.907285	MSMEG_3137	MSMEG_3137
-0.689259	8.99977	1.26988	0.259801	0.745842	MSMEG_5070	MSMEG_5070
-0.689252	6.35721	0.374986	0.540304	0.858254	MSMEG_4622	MSMEG_4622
-0.68695	10.0264	2.02659	0.15458	0.708587	MSMEG_6213	MSMEG_6213
-0.686783	5.74858	0.197511	0.656742	0.900709	MSMEG_6508	MSMEG_6508
-0.686273	7.84389	0.648019	0.42083	0.817812	adk	MSMEG_1484
-0.685776	6.53403	0.298117	0.585071	0.874455	MSMEG_0633	MSMEG_0633
-0.683895	8.09138	0.802965	0.370217	0.801856	MSMEG_5826	MSMEG_5826
-0.683614	7.64666	0.609559	0.434961	0.817812	MSMEG_4265	MSMEG_4265
-0.682364	8.50716	1.03833	0.30822	0.763138	cydB	MSMEG_3232
-0.67781	8.13316	0.743723	0.388479	0.817812	ccsB	MSMEG_0974
-0.674983	6.40713	0.470021	0.492984	0.823657	MSMEG_0586	MSMEG_0586
-0.67401	5.99961	0.25736	0.611944	0.879376	MSMEG_1838	MSMEG_1838
-0.673258	9.38034	1.48549	0.222929	0.72707	MSMEG_3151	MSMEG_3151
-0.672735	8.07847	0.819348	0.36538	0.798881	MSMEG_3400	MSMEG_3400
-0.671111	5.32106	0.176872	0.674079	0.910034	dtd	MSMEG_4291
-0.669524	5.95764	0.195986	0.657984	0.900709	cobQ	MSMEG_2588
-0.669251	5.98358	0.234246	0.628398	0.885435	MSMEG_1643	MSMEG_1643
-0.669181	6.38028	0.222207	0.637368	0.88955	MSMEG_5716	MSMEG_5716
-0.667888	11.276	2.0219	0.155058	0.708587	MSMEG_2926	MSMEG_2926
-0.666496	6.25987	0.279967	0.596727	0.874455	moaA	MSMEG_5698
-0.665381	6.75044	0.491071	0.483456	0.817812	MSMEG_3234	MSMEG_3234
-0.660776	9.25026	1.24042	0.265401	0.751586	MSMEG_4699	MSMEG_4699
-0.660752	9.4952	1.54147	0.214411	0.72707	MSMEG_1642	MSMEG_1642
-0.660558	6.93297	0.582697	0.445264	0.817812	MSMEG_6009	MSMEG_6009
-0.659907	7.65204	0.608795	0.435249	0.817812	MSMEG_3069	MSMEG_3069
-0.658982	6.49156	0.307469	0.579242	0.874455	MSMEG_1889	MSMEG_1889
-0.658662	7.10373	0.577646	0.447244	0.817812	MSMEG_2614	MSMEG_2614
-0.65708	4.92433	0.158078	0.690936	0.918778	MSMEG_1562	MSMEG_1562
-0.655492	6.2758	0.16411	0.685404	0.916812	MSMEG_1702	MSMEG_1702
-0.654307	5.9706	0.235944	0.627155	0.885435	MSMEG_6300	MSMEG_6300
-0.653878	8.08193	0.637775	0.424525	0.817812	MSMEG_0866	MSMEG_0866
-0.652503	10.7458	1.93586	0.164131	0.708587	thyA	MSMEG_2670
-0.650401	8.28169	0.710746	0.399204	0.817812	ssuD	MSMEG_4086
-0.649291	5.22077	0.142147	0.706159	0.930655	MSMEG_5013	MSMEG_5013
-0.649269	7.77174	0.59976	0.438677	0.817812	fumC	MSMEG_5240
-0.649142	6.9732	0.439491	0.507375	0.835955	MSMEG_5114	MSMEG_5114
-0.648441	5.2655	0.14055	0.707738	0.930961	MSMEG_0592	MSMEG_0592
-0.648216	5.27827	0.140135	0.70815	0.930961	MSMEG_2597	MSMEG_2597
-0.64726	5.83712	0.14167	0.706629	0.930655	MSMEG_1609	MSMEG_1609
-0.646024	5.4493	0.13646	0.711829	0.932243	MSMEG_2555	MSMEG_2555
-0.646004	9.74256	1.67957	0.194994	0.722495	MSMEG_1951	MSMEG_1951
-0.645749	5.67699	0.137336	0.710947	0.931982	MSMEG_3154	MSMEG_3154
-0.645479	5.5838	0.13616	0.712131	0.93239	MSMEG_2913	MSMEG_2913
-0.644385	9.75206	1.63291	0.201313	0.72707	MSMEG_5246	MSMEG_5246
-0.641736	8.00957	0.680511	0.409419	0.817812	MSMEG_6618	MSMEG_6618
-0.638226	6.43675	0.353316	0.552247	0.863514	MSMEG_4058	MSMEG_4058
-0.635514	7.69615	0.55267	0.457236	0.817812	MSMEG_5487	MSMEG_5487
-0.632543	7.05589	0.535245	0.464417	0.817812	MSMEG_4738	MSMEG_4738
-0.626845	7.78884	0.570334	0.450133	0.817812	MSMEG_5468	MSMEG_5468
-0.624796	8.42074	0.784219	0.375863	0.807541	hypA	MSMEG_2272
-0.624528	8.07247	0.648833	0.420538	0.817812	MSMEG_0923	MSMEG_0923
-0.62376	9.88747	1.55389	0.212574	0.72707	MSMEG_4595	MSMEG_4595
-0.622173	7.3724	0.502239	0.478525	0.817812	gmk	MSMEG_3051
-0.621228	5.85223	0.129913	0.718526	0.936889	MSMEG_4120	MSMEG_4120
-0.621155	8.85573	0.912414	0.339484	0.769455	MSMEG_5135	MSMEG_5135
-0.620235	5.48771	0.127027	0.721538	0.93819	ispE	MSMEG_5436
-0.618543	5.5013	0.123821	0.724929	0.939829	MSMEG_4315	MSMEG_4315
-0.618334	5.53666	0.123721	0.725036	0.939829	MSMEG_4472	MSMEG_4472
-0.615883	5.88748	0.166419	0.683317	0.915698	MSMEG_0366	MSMEG_0366
-0.615603	8.2187	0.692753	0.405238	0.817812	MSMEG_0637	MSMEG_0637
-0.614888	13.6382	1.57692	0.209216	0.72707	MSMEG_6467	MSMEG_6467
-0.614592	10.4011	1.67826	0.195168	0.722595	MSMEG_5090	MSMEG_5090
-0.612471	5.35741	0.125229	0.723434	0.938913	MSMEG_0315	MSMEG_0315
-0.611995	4.84475	0.141825	0.706477	0.930655	MSMEG_5151	MSMEG_5151
-0.611778	10.3819	1.67008	0.196261	0.72445	lepA	MSMEG_4556
-0.610328	5.69562	0.178298	0.672844	0.909052	MSMEG_1781	MSMEG_1781
-0.60892	6.8864	0.409577	0.52219	0.846767	MSMEG_5328	MSMEG_5328
-0.608897	5.40849	0.188715	0.663992	0.90489	MSMEG_3981	MSMEG_3981
-0.607195	10.7543	1.68191	0.194683	0.722433	MSMEG_1930	MSMEG_1930
-0.606859	12.2279	1.64239	0.200009	0.72707	MSMEG_5969	MSMEG_5969
-0.603066	6.97358	0.372751	0.541514	0.859152	MSMEG_6748	MSMEG_6748
-0.601857	6.23704	0.247274	0.619006	0.88334	MSMEG_0859	MSMEG_0859
-0.601487	5.46761	0.0759259	0.782899	0.962381	MSMEG_6379	MSMEG_6379
-0.601112	12.4214	1.59869	0.206101	0.72707	MSMEG_1742	MSMEG_1742
-0.600348	5.73532	0.169612	0.68046	0.913391	MSMEG_3976	MSMEG_3976
-0.599936	7.84872	0.488151	0.48476	0.818001	MSMEG_6387	MSMEG_6387
-0.599841	6.33499	0.260672	0.609663	0.879249	MSMEG_3034	MSMEG_3034
-0.598407	5.41937	0.0752879	0.78379	0.962381	MSMEG_0681	MSMEG_0681
-0.598071	7.76732	0.563446	0.452882	0.817812	leuD	MSMEG_2388
-0.597918	5.77691	0.148151	0.700312	0.926067	aroA	MSMEG_1890
-0.597607	6.95897	0.452317	0.501243	0.829539	MSMEG_1777	MSMEG_1777
-0.596696	11.2046	1.63699	0.200751	0.72707	MSMEG_1682	MSMEG_1682
-0.594363	7.537	0.467036	0.49436	0.824551	MSMEG_6141	MSMEG_6141
-0.593963	11.9714	1.5769	0.20922	0.72707	MSMEG_2826	MSMEG_2826
-0.593257	5.81434	0.0758951	0.782942	0.962381	MSMEG_3753	MSMEG_3753
-0.591793	6.8639	0.394016	0.530202	0.851525	MSMEG_2584	MSMEG_2584
-0.590579	8.72992	0.821748	0.364679	0.797706	MSMEG_2450	MSMEG_2450
-0.589468	6.2932	0.233747	0.628763	0.885435	MSMEG_0171	MSMEG_0171
-0.586899	8.57518	0.724338	0.394733	0.817812	ftsZ	MSMEG_4222
-0.585287	6.9462	0.311234	0.576929	0.874455	MSMEG_1703	MSMEG_1703
-0.58442	5.90024	0.0748228	0.784442	0.962381	MSMEG_0986	MSMEG_0986
-0.583815	8.37062	0.57946	0.446531	0.817812	MSMEG_0399	MSMEG_0399
-0.582427	7.79453	0.457831	0.498646	0.826915	MSMEG_3749	MSMEG_3749
-0.581706	6.09077	0.210319	0.646522	0.89596	MSMEG_5469	MSMEG_5469
-0.581667	8.95141	0.908825	0.340436	0.769455	MSMEG_1869	MSMEG_1869
-0.581565	5.23529	0.114598	0.734971	0.945988	MSMEG_5304	MSMEG_5304
-0.579225	5.75607	0.140094	0.708191	0.930961	MSMEG_0544	MSMEG_0544
-0.579124	7.21026	0.312118	0.576388	0.874455	MSMEG_3489	MSMEG_3489
-0.577851	5.66171	0.138826	0.709454	0.931411	MSMEG_0691	MSMEG_0691
-0.57762	5.33016	0.140315	0.707971	0.930961	rdgB	MSMEG_4899
-0.577592	5.31668	0.140663	0.707626	0.930961	MSMEG_6042	MSMEG_6042
-0.577046	5.32282	0.111159	0.738831	0.947448	MSMEG_5075	MSMEG_5075
-0.575547	5.35799	0.110075	0.740061	0.947743	MSMEG_1286	MSMEG_1286
-0.575054	5.71134	0.157016	0.691922	0.919188	MSMEG_3216	MSMEG_3216
-0.573758	6.21728	0.222255	0.637331	0.88955	gidB	MSMEG_6940
-0.572404	6.56038	0.241978	0.622785	0.884384	MSMEG_1839	MSMEG_1839
-0.572198	10.2737	1.4382	0.230443	0.729055	glgC	MSMEG_5078
-0.572033	5.6928	0.108872	0.741435	0.947969	MSMEG_0167	MSMEG_0167
-0.571992	6.20986	0.180369	0.67106	0.908229	MSMEG_6655	MSMEG_6655
-0.567814	5.62801	0.107102	0.743471	0.950077	MSMEG_3848	MSMEG_3848
-0.566929	8.61044	0.685314	0.407771	0.817812	MSMEG_2579	MSMEG_2579
-0.565165	6.27782	0.184954	0.667153	0.905996	MSMEG_6396	MSMEG_6396
-0.563433	7.51826	0.453913	0.500489	0.82885	MSMEG_6661	MSMEG_6661
-0.563035	7.42331	0.517122	0.472079	0.817812	MSMEG_4500	MSMEG_4500
-0.562629	7.43831	0.409667	0.522144	0.846767	MSMEG_4957	MSMEG_4957
-0.560817	7.07188	0.342311	0.558504	0.869138	MSMEG_0703	MSMEG_0703
-0.560214	6.48145	0.196419	0.657631	0.900709	xerC	MSMEG_2515
-0.559915	5.12268	0.0685445	0.79347	0.966625	MSMEG_0264	MSMEG_0264
-0.559518	8.7722	0.704552	0.401267	0.817812	MSMEG_3641	MSMEG_3641
-0.557741	8.05369	0.390874	0.531846	0.852833	MSMEG_6189	MSMEG_6189
-0.557692	7.85289	0.426767	0.513586	0.839852	MSMEG_4336	MSMEG_4336
-0.557673	6.27422	0.184102	0.667876	0.906016	MSMEG_5638	MSMEG_5638
-0.557343	5.76594	0.152221	0.696425	0.922327	MSMEG_3300	MSMEG_3300
-0.55693	5.89243	0.184741	0.667334	0.905996	MSMEG_2027	MSMEG_2027
-0.555264	5.47422	0.100873	0.750787	0.952473	MSMEG_3595	MSMEG_3595
-0.55396	7.01141	0.34991	0.55417	0.864589	MSMEG_3179	MSMEG_3179
-0.552955	7.88584	0.526269	0.468186	0.817812	MSMEG_3944	MSMEG_3944
-0.552195	5.66002	0.171137	0.679107	0.913391	MSMEG_3202	MSMEG_3202
-0.548563	4.91569	0.112411	0.737419	0.947031	ssuD	MSMEG_2843
-0.546953	6.70715	0.341023	0.559245	0.869474	MSMEG_3959	MSMEG_3959
-0.546403	5.69437	0.157112	0.691833	0.919188	MSMEG_6879	MSMEG_6879
-0.545658	5.63307	0.143527	0.704803	0.929998	MSMEG_0200	MSMEG_0200
-0.543767	6.19065	0.196035	0.657945	0.900709	MSMEG_6911	MSMEG_6911
-0.542902	11.4127	1.32991	0.248833	0.742862	MSMEG_2758	MSMEG_2758
-0.542105	8.97925	0.801842	0.370552	0.801856	recA	MSMEG_2723
-0.541391	5.77411	0.141792	0.70651	0.930655	MSMEG_0321	MSMEG_0321
-0.541021	5.41099	0.138851	0.70943	0.931411	rbsK	MSMEG_4585
-0.540238	5.1297	0.102265	0.749131	0.951713	MSMEG_3537	MSMEG_3537
-0.539413	7.67178	0.220523	0.638646	0.889909	MSMEG_6726	MSMEG_6726
-0.539232	11.7156	1.31356	0.251762	0.745842	ahcY	MSMEG_1843
-0.538217	8.57092	0.629172	0.427667	0.817812	MSMEG_1818	MSMEG_1818
-0.536299	5.0265	0.103798	0.747321	0.951425	MSMEG_6209	MSMEG_6209
-0.535278	7.86265	0.433497	0.510284	0.838123	MSMEG_0535	MSMEG_0535
-0.534879	6.98541	0.321671	0.57061	0.874455	MSMEG_2202	MSMEG_2202
-0.534326	7.07965	0.368448	0.543857	0.859719	MSMEG_5308	MSMEG_5308
-0.531896	6.1118	0.188093	0.664512	0.905096	MSMEG_5719	MSMEG_5719
-0.53183	6.55269	0.206186	0.649777	0.896232	MSMEG_6898	MSMEG_6898
-0.531439	7.11309	0.397351	0.528466	0.851203	MSMEG_0249	MSMEG_0249
-0.531254	4.97638	0.0638219	0.800556	0.969257	MSMEG_0320	MSMEG_0320
-0.53046	8.41408	0.433193	0.510433	0.838123	aspS	MSMEG_3003
-0.530174	7.42929	0.335674	0.562342	0.871791	MSMEG_5130	MSMEG_5130
-0.527226	7.10091	0.364097	0.546245	0.860995	MSMEG_4719	MSMEG_4719
-0.524627	8.97032	0.753407	0.385408	0.817812	MSMEG_1253	MSMEG_1253
-0.524206	6.41982	0.191269	0.661866	0.904255	MSMEG_3429	MSMEG_3429
-0.523753	8.9888	0.709558	0.399599	0.817812	MSMEG_4383	MSMEG_4383
-0.522338	6.93051	0.290928	0.589632	0.874455	argB	MSMEG_3774
-0.522123	9.97325	1.10006	0.294262	0.763138	acnA	MSMEG_3143
-0.521537	5.75094	0.114199	0.735417	0.945988	MSMEG_3834	MSMEG_3834
-0.521036	7.08626	0.298973	0.584532	0.874455	MSMEG_0348	MSMEG_0348
-0.520859	6.90716	0.383174	0.535915	0.854629	MSMEG_3939	MSMEG_3939
-0.51993	6.80093	0.251546	0.615993	0.880606	MSMEG_5725	MSMEG_5725
-0.519802	8.42006	0.505503	0.477099	0.817812	MSMEG_2593	MSMEG_2593
-0.519627	7.06	0.292352	0.588722	0.874455	MSMEG_0814	MSMEG_0814
-0.518738	6.05929	0.180137	0.67126	0.908229	MSMEG_3321	MSMEG_3321
-0.517522	5.94217	0.0946179	0.758389	0.954706	MSMEG_1284	MSMEG_1284
-0.516653	9.44439	0.882488	0.34753	0.776478	ilvE	MSMEG_4276
-0.512179	6.92032	0.319609	0.571848	0.874455	MSMEG_1269	MSMEG_1269
-0.511684	6.02081	0.119654	0.729413	0.943425	MSMEG_4728	MSMEG_4728
-0.510658	8.56747	0.551955	0.457527	0.817812	sufD	MSMEG_3123
-0.51035	6.83282	0.273187	0.601206	0.875178	MSMEG_3837	MSMEG_3837
-0.509785	4.87876	0.0603364	0.805967	0.970725	MSMEG_4475	MSMEG_4475
-0.50952	4.73653	0.105015	0.745896	0.951335	MSMEG_4317	MSMEG_4317
-0.50768	6.8379	0.276477	0.599025	0.874455	MSMEG_2173	MSMEG_2173
-0.506425	5.66867	0.0860931	0.769206	0.957751	MSMEG_6151	MSMEG_6151
-0.506184	7.40666	0.312209	0.576333	0.874455	MSMEG_4221	MSMEG_4221
-0.506083	5.64703	0.0857868	0.769606	0.957751	gabT	MSMEG_2959
-0.505236	9.59707	0.859779	0.35381	0.783533	tig	MSMEG_4674
-0.503616	8.82606	0.577227	0.447409	0.817812	rho	MSMEG_4954
-0.503045	5.55121	0.0838337	0.77217	0.957751	MSMEG_0291	MSMEG_0291
-0.502896	9.6509	0.955218	0.328404	0.765294	MSMEG_6329	MSMEG_6329
-0.502715	5.15862	0.109714	0.740472	0.947743	MSMEG_0470	MSMEG_0470
-0.502468	8.05113	0.372344	0.541735	0.859152	MSMEG_5439	MSMEG_5439
-0.499546	8.19681	0.426843	0.513548	0.839852	MSMEG_2085	MSMEG_2085
-0.499541	8.30999	0.42368	0.515113	0.841134	ilvD	MSMEG_0229
-0.49854	4.82985	0.0585239	0.808846	0.970853	MSMEG_1161	MSMEG_1161
-0.496882	7.88107	0.365486	0.545481	0.860456	MSMEG_2925	MSMEG_2925
-0.49533	7.24178	0.325862	0.568111	0.874455	MSMEG_4754	MSMEG_4754
-0.493132	9.56526	0.87411	0.349829	0.778775	treZ	MSMEG_3184
-0.491759	7.8421	0.429023	0.512475	0.839342	MSMEG_3945	MSMEG_3945
-0.488519	5.9098	0.0839361	0.772035	0.957751	MSMEG_2198	MSMEG_2198
-0.487897	5.9537	0.122005	0.726873	0.941631	rimI	MSMEG_1579
-0.487779	6.355	0.159259	0.689843	0.918666	MSMEG_3363	MSMEG_3363
-0.487374	7.07104	0.314388	0.575005	0.874455	MSMEG_2143	MSMEG_2143
-0.486354	8.73199	0.547706	0.459264	0.817812	MSMEG_1241	MSMEG_1241
-0.486049	5.24012	0.0812444	0.77562	0.960261	MSMEG_1733	MSMEG_1733
-0.486031	8.4127	0.327867	0.566923	0.874455	MSMEG_5685	MSMEG_5685
-0.485004	9.01001	0.693589	0.404954	0.817812	MSMEG_3233	MSMEG_3233
-0.484645	8.19359	0.356315	0.550565	0.862259	MSMEG_4183	MSMEG_4183
-0.481836	5.20134	0.111898	0.737996	0.947031	MSMEG_4204	MSMEG_4204
-0.481729	7.19904	0.298752	0.584671	0.874455	MSMEG_2407	MSMEG_2407
-0.476526	6.75192	0.160288	0.688895	0.917903	MSMEG_3634	MSMEG_3634
-0.476398	5.76359	0.109716	0.740471	0.947743	MSMEG_0534	MSMEG_0534
-0.47514	9.21783	0.702824	0.401844	0.817812	MSMEG_1640	MSMEG_1640
-0.47096	7.43155	0.314871	0.574712	0.874455	MSMEG_6664	MSMEG_6664
-0.470102	9.60777	0.801249	0.370729	0.801856	MSMEG_3839	MSMEG_3839
-0.469507	8.27559	0.0685782	0.793421	0.966625	MSMEG_1873	MSMEG_1873
-0.467555	6.96421	0.267096	0.605291	0.878319	MSMEG_1853	MSMEG_1853
-0.467189	5.6169	0.0911552	0.762716	0.955079	MSMEG_3888	MSMEG_3888
-0.467131	5.58723	0.0909525	0.762972	0.955079	MSMEG_4455	MSMEG_4455
-0.465225	5.42573	0.10446	0.746545	0.951335	hisH	MSMEG_3208
-0.465194	4.68911	0.0531999	0.817588	0.975612	MSMEG_0708	MSMEG_0708
-0.464978	6.17451	0.103834	0.747279	0.951425	MSMEG_0131	MSMEG_0131
-0.463498	7.25419	0.282407	0.595133	0.874455	MSMEG_6610	MSMEG_6610
-0.462052	6.70465	0.22863	0.632546	0.888167	MSMEG_2199	MSMEG_2199
-0.461606	6.28052	0.140411	0.707876	0.930961	MSMEG_4292	MSMEG_4292
-0.461541	12.9932	0.911688	0.339676	0.769455	rpsA	MSMEG_3833
-0.461335	7.81802	0.316978	0.573434	0.874455	MSMEG_4943	MSMEG_4943
-0.460451	7.08947	0.295378	0.586799	0.874455	MSMEG_0300	MSMEG_0300
-0.460413	6.31148	0.138615	0.709665	0.931411	MSMEG_0172	MSMEG_0172
-0.459868	11.8616	0.952101	0.329195	0.765294	gyrA	MSMEG_0006
-0.459219	8.73587	0.499418	0.479763	0.817812	MSMEG_4084	MSMEG_4084
-0.459044	5.84065	0.103029	0.748227	0.951652	MSMEG_4704	MSMEG_4704
-0.455958	7.73488	0.327172	0.567335	0.874455	MSMEG_1798	MSMEG_1798
-0.455739	7.8592	0.32427	0.569058	0.874455	metE	MSMEG_6638
-0.454743	5.84338	0.0889626	0.765503	0.956274	MSMEG_0349	MSMEG_0349
-0.452859	8.02041	0.336044	0.562127	0.871791	MSMEG_4267	MSMEG_4267
-0.452574	8.5398	0.427378	0.513285	0.839852	MSMEG_5247	MSMEG_5247
-0.452187	7.96546	0.286913	0.59221	0.874455	MSMEG_2750	MSMEG_2750
-0.451875	6.93736	0.193081	0.660369	0.903721	MSMEG_0763	MSMEG_0763
-0.451017	5.12073	0.0927669	0.760691	0.954995	MSMEG_6134	MSMEG_6134
-0.450732	8.23214	0.397974	0.528144	0.851181	MSMEG_3948	MSMEG_3948
-0.449864	7.95786	0.313083	0.5758	0.874455	rplV	MSMEG_1441
-0.449519	5.21866	0.0704104	0.790742	0.965719	hydA	MSMEG_3553
-0.449467	10.453	0.912582	0.33944	0.769455	MSMEG_6422	MSMEG_6422
-0.449305	4.62254	0.0506916	0.821866	0.977861	MSMEG_5110	MSMEG_5110
-0.449139	10.5086	0.908724	0.340463	0.769455	MSMEG_5244	MSMEG_5244
-0.445851	8.50818	0.420148	0.516869	0.842598	MSMEG_0558	MSMEG_0558
-0.442826	5.89954	0.0695129	0.79205	0.966308	MSMEG_5783	MSMEG_5783
-0.439963	6.28189	0.0985121	0.753625	0.952872	MSMEG_4705	MSMEG_4705
-0.439736	8.17905	0.267542	0.60499	0.878319	MSMEG_5079	MSMEG_5079
-0.438474	5.65874	0.0819201	0.774715	0.959487	MSMEG_5554	MSMEG_5554
-0.438103	5.56126	0.0787787	0.778962	0.962316	MSMEG_1303	MSMEG_1303
-0.43694	6.62279	0.129633	0.718816	0.936889	MSMEG_3766	MSMEG_3766
-0.436282	5.81485	0.0662918	0.796817	0.968224	MSMEG_3287	MSMEG_3287
-0.43419	5.7822	0.0652697	0.798355	0.968966	MSMEG_3671	MSMEG_3671
-0.434083	9.46258	0.687427	0.407049	0.817812	MSMEG_1786	MSMEG_1786
-0.433518	9.64679	0.696252	0.404054	0.817812	fbiC	MSMEG_5126
-0.433156	9.40955	0.61459	0.433072	0.817812	alaS	MSMEG_3025
-0.432748	6.32428	0.0978349	0.754446	0.952872	MSMEG_5124	MSMEG_5124
-0.431953	5.23444	0.0410531	0.839437	0.987411	MSMEG_2478	MSMEG_2478
-0.431543	6.70119	0.172031	0.678317	0.913391	MSMEG_2201	MSMEG_2201
-0.431361	5.53011	0.063025	0.801779	0.969257	MSMEG_5559	MSMEG_5559
-0.431281	7.65382	0.22631	0.634278	0.888167	MSMEG_4923	MSMEG_4923
-0.430367	8.18198	0.327588	0.567088	0.874455	MSMEG_1919	MSMEG_1919
-0.430002	6.48749	0.165684	0.68398	0.916084	MSMEG_3380	MSMEG_3380
-0.429939	7.51383	0.245986	0.619921	0.88334	MSMEG_0964	MSMEG_0964
-0.429593	6.63553	0.125372	0.723283	0.938913	MSMEG_3667	MSMEG_3667
-0.429425	7.69204	0.285276	0.593269	0.874455	MSMEG_1061	MSMEG_1061
-0.428046	6.02338	0.120514	0.728481	0.942468	MSMEG_2958	MSMEG_2958
-0.427414	10.9422	0.836305	0.360465	0.793227	dnaK	MSMEG_0709
-0.427	5.86617	0.0645124	0.799503	0.969257	MSMEG_5272	MSMEG_5272
-0.426805	5.78818	0.0626589	0.802344	0.969257	MSMEG_6185	MSMEG_6185
-0.426152	5.8138	0.0627955	0.802133	0.969257	MSMEG_4464	MSMEG_4464
-0.424791	5.25129	0.0629384	0.801913	0.969257	MSMEG_4399	MSMEG_4399
-0.42473	6.18469	0.0880574	0.766664	0.956662	MSMEG_5266	MSMEG_5266
-0.424679	7.51953	0.2456	0.620195	0.88334	MSMEG_2443	MSMEG_2443
-0.42298	6.25719	0.126531	0.722059	0.93862	MSMEG_0505	MSMEG_0505
-0.4229	10.3736	0.799799	0.371162	0.801856	MSMEG_5245	MSMEG_5245
-0.421793	7.76126	0.264116	0.607311	0.878617	MSMEG_5156	MSMEG_5156
-0.421684	6.71102	0.179543	0.67177	0.908419	ectC	MSMEG_3899
-0.42016	9.68327	0.687917	0.406882	0.817812	MSMEG_1681	MSMEG_1681
-0.418539	5.84413	0.0743832	0.785061	0.962381	MSMEG_3435	MSMEG_3435
-0.417988	5.10665	0.0631724	0.801553	0.969257	MSMEG_4018	MSMEG_4018
-0.416146	6.19021	0.112447	0.737378	0.947031	MSMEG_5189	MSMEG_5189
-0.414366	12.0014	0.766414	0.381337	0.814516	MSMEG_3890	MSMEG_3890
-0.414163	5.04478	0.0391851	0.843084	0.987575	MSMEG_3098	MSMEG_3098
-0.413734	8.18979	0.320011	0.571606	0.874455	MSMEG_5318	MSMEG_5318
-0.413655	7.11415	0.178452	0.672711	0.909052	MSMEG_2615	MSMEG_2615
-0.413448	7.36728	0.209869	0.646874	0.89596	MSMEG_3309	MSMEG_3309
-0.411965	6.94938	0.159274	0.68983	0.918666	dnaJ	MSMEG_4504
-0.411943	7.50864	0.266618	0.605614	0.878319	MSMEG_6423	MSMEG_6423
-0.411219	7.6472	0.227117	0.633674	0.888167	MSMEG_2009	MSMEG_2009
-0.410076	7.09863	0.104715	0.746247	0.951335	dut	MSMEG_2765
-0.409315	8.23861	0.254844	0.613689	0.880136	MSMEG_0932	MSMEG_0932
-0.408552	7.11076	0.196484	0.657578	0.900709	MSMEG_0230	MSMEG_0230
-0.403936	4.95258	0.0381451	0.845154	0.987575	MSMEG_6802	MSMEG_6802
-0.403441	6.70972	0.131747	0.716631	0.935782	MSMEG_2940	MSMEG_2940
-0.402273	6.3066	0.0835364	0.772563	0.957751	MSMEG_6839	MSMEG_6839
-0.401855	6.43859	0.0872547	0.767699	0.956843	MSMEG_3021	MSMEG_3021
-0.400867	5.08589	0.0586782	0.808599	0.970795	MSMEG_4362	MSMEG_4362
-0.400548	7.26151	0.238767	0.625103	0.885435	MSMEG_2769	MSMEG_2769
-0.40001	5.45673	0.0671629	0.795515	0.967549	selB	MSMEG_1849
-0.399182	8.03275	0.264537	0.607025	0.878617	ectA	MSMEG_3901
-0.395884	5.51481	0.0649081	0.798902	0.969257	MSMEG_1194	MSMEG_1194
-0.395404	5.98797	0.0917794	0.76193	0.955079	MSMEG_5611	MSMEG_5611
-0.394825	4.7734	0.0634735	0.80109	0.969257	MSMEG_5113	MSMEG_5113
-0.394005	6.69684	0.170662	0.679528	0.913391	MSMEG_2026	MSMEG_2026
-0.39318	6.54093	0.102193	0.749216	0.951713	MSMEG_3859	MSMEG_3859
-0.393072	8.31304	0.286958	0.592182	0.874455	MSMEG_6353	MSMEG_6353
-0.390292	6.96312	0.170581	0.679599	0.913391	fbaA	MSMEG_0752
-0.389832	6.23576	0.0890788	0.765354	0.956274	MSMEG_2439	MSMEG_2439
-0.389529	7.41214	0.191512	0.661665	0.904233	dnaJ	MSMEG_0711
-0.38908	8.01905	0.236662	0.626632	0.885435	MSMEG_0457	MSMEG_0457
-0.387905	9.59252	0.475638	0.490411	0.821317	MSMEG_4939	MSMEG_4939
-0.387399	7.55367	0.188754	0.66396	0.90489	MSMEG_3885	MSMEG_3885
-0.387104	8.17582	0.222349	0.63726	0.88955	MSMEG_5225	MSMEG_5225
-0.38651	7.66935	0.220032	0.639019	0.889909	aroC	MSMEG_3030
-0.386316	7.17811	0.172683	0.677742	0.912968	MSMEG_0695	MSMEG_0695
-0.385556	4.79845	0.0363013	0.848896	0.987575	MSMEG_1628	MSMEG_1628
-0.38472	6.58042	0.0985535	0.753575	0.952872	MSMEG_4908	MSMEG_4908
-0.384521	6.22495	0.106061	0.744677	0.951335	MSMEG_4753	MSMEG_4753
-0.382647	9.96948	0.590305	0.442309	0.817812	MSMEG_0672	MSMEG_0672
-0.382465	8.46472	0.27939	0.597106	0.874455	MSMEG_4847	MSMEG_4847
-0.381137	7.34871	0.197167	0.657021	0.900709	MSMEG_6822	MSMEG_6822
-0.380956	6.46481	0.0949331	0.758	0.95446	MSMEG_6312	MSMEG_6312
-0.379231	11.1133	0.649988	0.420125	0.817812	MSMEG_1817	MSMEG_1817
-0.378671	6.58778	0.0994341	0.752512	0.952872	galU	MSMEG_5471
-0.37782	5.63582	0.0480418	0.826508	0.980528	MSMEG_3265	MSMEG_3265
-0.375809	6.53815	0.138606	0.709674	0.931411	ctaD	MSMEG_4437
-0.375303	8.31173	0.271216	0.602522	0.876428	MSMEG_5733	MSMEG_5733
-0.374907	5.60603	0.0313452	0.859474	0.987575	MSMEG_4681	MSMEG_4681
-0.37477	5.63849	0.0313939	0.859366	0.987575	MSMEG_6428	MSMEG_6428
-0.374723	7.3988	0.179569	0.671748	0.908419	MSMEG_3649	MSMEG_3649
-0.374254	5.46875	0.0311473	0.859914	0.987575	MSMEG_1531	MSMEG_1531
-0.373891	11.3783	0.624306	0.429459	0.817812	rpsC	MSMEG_1442
-0.373216	5.50423	0.0672641	0.795365	0.967549	MSMEG_0476	MSMEG_0476
-0.371844	6.38918	0.0984383	0.753714	0.952872	MSMEG_1416	MSMEG_1416
-0.371105	5.30909	0.0309401	0.860376	0.987575	MSMEG_6630	MSMEG_6630
-0.370652	7.5651	0.17814	0.672981	0.909052	glmU	MSMEG_5426
-0.370195	5.27713	0.0309013	0.860462	0.987575	MSMEG_3239	MSMEG_3239
-0.369849	5.26573	0.0308875	0.860493	0.987575	MSMEG_3801	MSMEG_3801
-0.368385	5.22093	0.0308334	0.860614	0.987575	MSMEG_4834	MSMEG_4834
-0.367353	7.63225	0.207173	0.648997	0.896164	MSMEG_0594	MSMEG_0594
-0.367149	5.18649	0.0307914	0.860708	0.987575	MSMEG_0696	MSMEG_0696
-0.364963	9.57543	0.470342	0.492836	0.823657	rplW	MSMEG_1438
-0.364573	5.62652	0.0458435	0.830462	0.982753	MSMEG_4307	MSMEG_4307
-0.363408	11.7273	0.588031	0.443189	0.817812	MSMEG_6091	MSMEG_6091
-0.363408	5.09453	0.0306739	0.860971	0.987575	MSMEG_6617	MSMEG_6617
-0.362188	8.41809	0.181355	0.670215	0.907818	MSMEG_5223	MSMEG_5223
-0.362108	7.558	0.190242	0.662719	0.904272	MSMEG_2112	MSMEG_2112
-0.362	6.54836	0.109534	0.740678	0.947743	pstB	MSMEG_5779
-0.36119	4.59754	0.0338877	0.853947	0.987575	MSMEG_0723	MSMEG_0723
-0.360778	5.03728	0.0305941	0.86115	0.987575	MSMEG_2919	MSMEG_2919
-0.360063	6.03897	0.0611504	0.804689	0.970232	MSMEG_0224	MSMEG_0224
-0.359893	9.33393	0.411616	0.521156	0.84593	MSMEG_3222	MSMEG_3222
-0.359721	10.7062	0.586065	0.443952	0.817812	mmsA	MSMEG_2449
-0.358441	4.98982	0.0305226	0.861311	0.987575	MSMEG_0245	MSMEG_0245
-0.358171	5.61488	0.0542019	0.815908	0.974644	MSMEG_1723	MSMEG_1723
-0.357855	6.18905	0.0743365	0.785127	0.962381	MSMEG_5796	MSMEG_5796
-0.35777	4.97668	0.0305018	0.861358	0.987575	MSMEG_2152	MSMEG_2152
-0.357515	4.97173	0.0304938	0.861376	0.987575	MSMEG_3543	MSMEG_3543
-0.357226	4.96617	0.0304848	0.861396	0.987575	MSMEG_0335	MSMEG_0335
-0.356787	6.60656	0.138379	0.709901	0.93146	MSMEG_1929	MSMEG_1929
-0.356575	6.10399	0.0607977	0.805242	0.970499	MSMEG_5055	MSMEG_5055
-0.356117	7.63809	0.191831	0.661401	0.904123	MSMEG_0542	MSMEG_0542
-0.35608	8.63994	0.282102	0.595332	0.874455	MSMEG_0070	MSMEG_0070
-0.355585	10.1763	0.530713	0.466314	0.817812	MSMEG_6196	MSMEG_6196
-0.355362	6.4179	0.0987894	0.75329	0.952872	pntB	MSMEG_4108
-0.353597	4.89875	0.0303683	0.861659	0.987575	MSMEG_0574	MSMEG_0574
-0.35329	6.88656	0.154397	0.694371	0.920944	MSMEG_4053	MSMEG_4053
-0.35293	10.1503	0.504018	0.477747	0.817812	infB	MSMEG_2628
-0.352877	10.5668	0.551832	0.457577	0.817812	MSMEG_2820	MSMEG_2820
-0.352473	5.82611	0.0607071	0.805384	0.970499	MSMEG_0652	MSMEG_0652
-0.350287	6.38572	0.0769522	0.781473	0.962381	MSMEG_4243	MSMEG_4243
-0.349932	4.83441	0.0302438	0.86194	0.987575	MSMEG_2762	MSMEG_2762
-0.349646	7.87316	0.187675	0.664862	0.905158	argG	MSMEG_3770
-0.349605	4.82881	0.0302323	0.861966	0.987575	MSMEG_3369	MSMEG_3369
-0.348209	12.035	0.540778	0.462117	0.817812	MSMEG_1743	MSMEG_1743
-0.348088	4.8031	0.0301782	0.862088	0.987575	MSMEG_2682	MSMEG_2682
-0.347326	5.50358	0.0406637	0.84019	0.987411	MSMEG_0309	MSMEG_0309
-0.346334	6.99337	0.131381	0.717008	0.936024	MSMEG_2691	MSMEG_2691
-0.345664	7.11864	0.168979	0.681024	0.913391	MSMEG_0369	MSMEG_0369
-0.34499	6.02825	0.0781168	0.779868	0.962381	MSMEG_3395	MSMEG_3395
-0.343104	6.21066	0.0926554	0.760831	0.954995	MSMEG_0593	MSMEG_0593
-0.342969	7.63668	0.183604	0.668298	0.906016	MSMEG_6755	MSMEG_6755
-0.340885	6.71393	0.109546	0.740665	0.947743	MSMEG_0221	MSMEG_0221
-0.338568	7.1029	0.131847	0.716527	0.935782	MSMEG_1188	MSMEG_1188
-0.338561	9.88511	0.463928	0.4958	0.825521	aspA	MSMEG_1677
-0.338013	4.63966	0.0297829	0.862985	0.987575	MSMEG_1612	MSMEG_1612
-0.336758	4.61979	0.0297292	0.863108	0.987575	MSMEG_2977	MSMEG_2977
-0.33648	10.4301	0.492697	0.482734	0.817812	MSMEG_0641	MSMEG_0641
-0.334551	4.58494	0.0296324	0.863328	0.987575	MSMEG_3914	MSMEG_3914
-0.333625	6.65095	0.0968831	0.755605	0.953336	MSMEG_3080	MSMEG_3080
-0.333174	4.56319	0.0295706	0.86347	0.987575	MSMEG_2988	MSMEG_2988
-0.331962	7.27638	0.115599	0.73386	0.945933	MSMEG_3646	MSMEG_3646
-0.330927	6.06018	0.0670843	0.795632	0.967549	MSMEG_6214	MSMEG_6214
-0.330858	6.05538	0.0757977	0.783077	0.962381	MSMEG_3593	MSMEG_3593
-0.330471	5.93878	0.0737379	0.785972	0.962487	MSMEG_3929	MSMEG_3929
-0.329921	4.51165	0.0294202	0.863814	0.987575	MSMEG_2210	MSMEG_2210
-0.329921	4.51165	0.0294202	0.863814	0.987575	MSMEG_6498	MSMEG_6498
-0.328295	5.9029	0.0665581	0.796418	0.968224	tpiA	MSMEG_6785
-0.328001	6.67809	0.0754552	0.783556	0.962381	MSMEG_1195	MSMEG_1195
-0.327459	9.08318	0.325772	0.568165	0.874455	MSMEG_3951	MSMEG_3951
-0.325795	6.38931	0.0750652	0.784102	0.962381	thpD	MSMEG_3898
-0.324801	5.8429	0.0464797	0.829308	0.981949	recD	MSMEG_1325
-0.322664	7.68879	0.167203	0.682613	0.915254	cysNC	MSMEG_4978
-0.322421	6.57357	0.0861074	0.769188	0.957751	MSMEG_3210	MSMEG_3210
-0.321276	8.05469	0.164642	0.684922	0.916595	tpiA	MSMEG_3086
-0.319533	7.40539	0.146959	0.701462	0.926338	MSMEG_2785	MSMEG_2785
-0.319016	7.3679	0.137225	0.711059	0.931982	MSMEG_6154	MSMEG_6154
-0.31768	5.61571	0.0426485	0.83639	0.986522	MSMEG_5976	MSMEG_5976
-0.317122	6.28936	0.0618643	0.803575	0.969536	MSMEG_0549	MSMEG_0549
-0.315131	6.42703	0.0840427	0.771894	0.957751	MSMEG_3326	MSMEG_3326
-0.31475	5.15752	0.0352008	0.851177	0.987575	MSMEG_3999	MSMEG_3999
-0.313747	8.96313	0.235855	0.62722	0.885435	MSMEG_5273	MSMEG_5273
-0.310261	7.85366	0.104341	0.746684	0.951335	MSMEG_2736	MSMEG_2736
-0.310227	8.16197	0.166008	0.683688	0.915944	tylF	MSMEG_0388
-0.309837	6.03704	0.0361943	0.849116	0.987575	MSMEG_5784	MSMEG_5784
-0.309785	8.62767	0.198273	0.656122	0.900423	MSMEG_4128	MSMEG_4128
-0.309754	5.88031	0.0435061	0.834777	0.985987	MSMEG_3544	MSMEG_3544
-0.309715	5.29069	0.0337896	0.854157	0.987575	MSMEG_3109	MSMEG_3109
-0.309573	5.69757	0.0334319	0.854922	0.987575	MSMEG_4305	MSMEG_4305
-0.30956	5.666	0.0332982	0.855209	0.987575	MSMEG_5028	MSMEG_5028
-0.309548	5.53809	0.0330285	0.85579	0.987575	MSMEG_3286	MSMEG_3286
-0.309543	5.58867	0.0330806	0.855678	0.987575	MSMEG_4568	MSMEG_4568
-0.309044	6.62387	0.0740771	0.785493	0.962381	MSMEG_6138	MSMEG_6138
-0.30626	9.72417	0.356953	0.550209	0.861976	MSMEG_6514	MSMEG_6514
-0.305787	9.48524	0.309478	0.578006	0.874455	MSMEG_3185	MSMEG_3185
-0.305389	5.57411	0.0447835	0.832404	0.984664	MSMEG_4765	MSMEG_4765
-0.305172	9.20282	0.283576	0.594372	0.874455	MSMEG_4261	MSMEG_4261
-0.304819	8.95882	0.236807	0.626526	0.885435	miaB	MSMEG_2729
-0.302854	6.71511	0.0792729	0.778288	0.962211	MSMEG_2764	MSMEG_2764
-0.302851	9.71343	0.334439	0.563062	0.872395	atpD	MSMEG_4936
-0.302256	5.94616	0.0327241	0.856449	0.987575	MSMEG_0949	MSMEG_0949
-0.301819	5.23799	0.0316113	0.858885	0.987575	MSMEG_3264	MSMEG_3264
-0.3014	6.40141	0.0746316	0.784711	0.962381	MSMEG_1915	MSMEG_1915
-0.300006	7.97122	0.147615	0.700828	0.926338	MSMEG_1514	MSMEG_1514
-0.298192	8.42476	0.162293	0.687058	0.917069	smpB	MSMEG_2091
-0.297401	5.95103	0.0402667	0.840962	0.987575	MSMEG_3923	MSMEG_3923
-0.297101	11.5381	0.398451	0.527896	0.851181	MSMEG_4263	MSMEG_4263
-0.296936	6.34748	0.0469593	0.828443	0.981874	truB	MSMEG_2649
-0.296582	6.92415	0.0989356	0.753113	0.952872	MSMEG_2697	MSMEG_2697
-0.295924	6.46825	0.0652539	0.798379	0.968966	MSMEG_6282	MSMEG_6282
-0.295406	6.73744	0.0949536	0.757974	0.95446	MSMEG_1599	MSMEG_1599
-0.295289	6.63622	0.085015	0.770615	0.957751	MSMEG_4273	MSMEG_4273
-0.293596	7.14534	0.10925	0.741002	0.947757	MSMEG_4396	MSMEG_4396
-0.292729	6.36535	0.0601643	0.806239	0.970735	MSMEG_0044	MSMEG_0044
-0.289342	10.6291	0.374027	0.540823	0.8588	MSMEG_1821	MSMEG_1821
-0.284996	10.2566	0.336342	0.561954	0.871791	MSMEG_0410	MSMEG_0410
-0.284858	7.55073	0.101773	0.749715	0.951853	MSMEG_4270	MSMEG_4270
-0.284271	10.84	0.365436	0.545508	0.860456	metH	MSMEG_4185
-0.284083	5.54417	0.028573	0.86577	0.988372	psd	MSMEG_0861
-0.283309	7.10582	0.0768926	0.781556	0.962381	MSMEG_0679	MSMEG_0679
-0.282469	8.43313	0.152097	0.696543	0.922327	MSMEG_6399	MSMEG_6399
-0.281748	5.98717	0.0463336	0.829572	0.982024	MSMEG_2783	MSMEG_2783
-0.280941	5.32044	0.017906	0.893551	0.999523	MSMEG_0220	MSMEG_0220
-0.28033	7.39459	0.101109	0.750506	0.952473	MSMEG_6080	MSMEG_6080
-0.280034	6.54791	0.0660619	0.797162	0.968224	MSMEG_0767	MSMEG_0767
-0.279907	9.14671	0.2365	0.62675	0.885435	MSMEG_1771	MSMEG_1771
-0.27976	9.94783	0.330957	0.565102	0.874263	MSMEG_4618	MSMEG_4618
-0.27716	7.5653	0.104919	0.746007	0.951335	MSMEG_6190	MSMEG_6190
-0.275671	5.68211	0.0370195	0.847427	0.987575	MSMEG_0413	MSMEG_0413
-0.275236	8.67603	0.164829	0.684753	0.916595	MSMEG_4127	MSMEG_4127
-0.27311	6.41569	0.0538354	0.816521	0.974814	recF	MSMEG_0003
-0.273013	6.7873	0.0840828	0.771841	0.957751	MSMEG_2626	MSMEG_2626
-0.270001	10.0662	0.304351	0.581173	0.874455	MSMEG_6942	MSMEG_6942
-0.269822	8.50678	0.140866	0.707424	0.930961	MSMEG_2927	MSMEG_2927
-0.26875	12.8958	0.309105	0.578235	0.874455	infC	MSMEG_3793
-0.267423	7.02789	0.0773865	0.780873	0.962381	MSMEG_3148	MSMEG_3148
-0.267361	6.02163	0.0385669	0.844311	0.987575	MSMEG_6737	MSMEG_6737
-0.26704	7.84778	0.0886087	0.765956	0.956274	MSMEG_3884	MSMEG_3884
-0.266871	5.94298	0.0329345	0.855993	0.987575	MSMEG_4250	MSMEG_4250
-0.265192	7.36226	0.0983041	0.753877	0.952872	MSMEG_6815	MSMEG_6815
-0.263743	8.85956	0.169576	0.680493	0.913391	MSMEG_5710	MSMEG_5710
-0.263637	8.4635	0.130943	0.717459	0.936364	MSMEG_0234	MSMEG_0234
-0.263316	5.80579	0.0308272	0.860628	0.987575	MSMEG_6125	MSMEG_6125
-0.262855	5.93556	0.0404788	0.840549	0.987411	MSMEG_0520	MSMEG_0520
-0.262487	6.41326	0.0497662	0.823473	0.978348	MSMEG_1334	MSMEG_1334
-0.26106	8.07316	0.0910219	0.762885	0.955079	MSMEG_1883	MSMEG_1883
-0.260572	6.50511	0.0558865	0.813122	0.973126	MSMEG_0228	MSMEG_0228
-0.260181	7.81107	0.0987522	0.753335	0.952872	MSMEG_4083	MSMEG_4083
-0.259781	4.47526	0.0191333	0.889986	0.997876	MSMEG_5762	MSMEG_5762
-0.259106	6.91934	0.0777335	0.780395	0.962381	MSMEG_5093	MSMEG_5093
-0.259063	7.7406	0.0705512	0.790538	0.965719	MSMEG_5007	MSMEG_5007
-0.258773	8.05498	0.114001	0.735638	0.945988	MSMEG_2746	MSMEG_2746
-0.258325	9.89578	0.244983	0.620635	0.883409	MSMEG_6935	MSMEG_6935
-0.257354	7.44283	0.083266	0.772922	0.957751	MSMEG_6450	MSMEG_6450
-0.257235	6.51906	0.0570297	0.811256	0.972222	MSMEG_1837	MSMEG_1837
-0.255074	8.50952	0.128442	0.720056	0.937507	MSMEG_5706	MSMEG_5706
-0.255001	8.55883	0.133958	0.714367	0.934069	MSMEG_0251	MSMEG_0251
-0.254247	12.083	0.285017	0.593437	0.874455	MSMEG_0382	MSMEG_0382
-0.25405	11.3815	0.28996	0.590251	0.874455	treS	MSMEG_6515
-0.253728	4.58725	0.0177926	0.893887	0.999523	MSMEG_1219	MSMEG_1219
-0.253239	5.79997	0.0226428	0.880391	0.993232	MSMEG_1062	MSMEG_1062
-0.253201	5.33785	0.0223018	0.881288	0.993271	MSMEG_0196	MSMEG_0196
-0.252257	6.90503	0.0718469	0.788669	0.964969	MSMEG_5026	MSMEG_5026
-0.252168	5.77282	0.0218982	0.882359	0.993285	MSMEG_4599	MSMEG_4599
-0.252063	5.90677	0.0228181	0.879932	0.993209	eutC	MSMEG_1554
-0.251385	4.62983	0.0172939	0.895376	0.999523	MSMEG_6871	MSMEG_6871
-0.250628	4.64356	0.0171351	0.895855	0.999523	MSMEG_6717	MSMEG_6717
-0.250017	6.18873	0.036917	0.847636	0.987575	MSMEG_6740	MSMEG_6740
-0.24923	5.46997	0.0268158	0.869925	0.989405	MSMEG_3584	MSMEG_3584
-0.248951	8.18832	0.11617	0.733229	0.945691	MSMEG_5965	MSMEG_5965
-0.247799	4.6949	0.0165516	0.897633	0.999523	MSMEG_4768	MSMEG_4768
-0.247799	4.6949	0.0165516	0.897633	0.999523	MSMEG_6866	MSMEG_6866
-0.246552	8.29356	0.104451	0.746555	0.951335	MSMEG_3249	MSMEG_3249
-0.245115	8.63657	0.137911	0.710369	0.931825	MSMEG_6212	MSMEG_6212
-0.243532	6.96582	0.0741686	0.785364	0.962381	MSMEG_6615	MSMEG_6615
-0.242908	11.7106	0.258547	0.611125	0.879376	atpB	MSMEG_4942
-0.242389	4.79438	0.0154785	0.90099	1	MSMEG_1506	MSMEG_1506
-0.241295	9.3854	0.186709	0.665674	0.905377	clpP	MSMEG_4672
-0.240946	7.57548	0.0773356	0.780943	0.962381	MSMEG_3735	MSMEG_3735
-0.240345	7.0561	0.0721418	0.788246	0.964789	MSMEG_5941	MSMEG_5941
-0.239141	5.79782	0.0321409	0.85772	0.987575	MSMEG_5964	MSMEG_5964
-0.239055	7.89004	0.083381	0.772769	0.957751	MSMEG_6412	MSMEG_6412
-0.238451	9.13533	0.152328	0.696324	0.922327	atpG	MSMEG_4937
-0.237403	7.14221	0.0743992	0.785038	0.962381	MSMEG_1641	MSMEG_1641
-0.235529	10.3305	0.237091	0.62632	0.885435	MSMEG_5773	MSMEG_5773
-0.234248	4.95337	0.0139665	0.905926	1	MSMEG_1829	MSMEG_1829
-0.233454	8.20724	0.0906586	0.763344	0.955301	MSMEG_5540	MSMEG_5540
-0.233302	6.02875	0.0296493	0.86329	0.987575	MSMEG_4948	MSMEG_4948
-0.232417	4.99199	0.0136432	0.907016	1	MSMEG_0345	MSMEG_0345
-0.2324	4.99234	0.0136404	0.907026	1	MSMEG_6471	MSMEG_6471
-0.230924	6.26869	0.0416178	0.838352	0.987411	MSMEG_5209	MSMEG_5209
-0.230739	9.1269	0.145652	0.702729	0.927511	MSMEG_3619	MSMEG_3619
-0.230636	5.03107	0.0133351	0.908067	1	MSMEG_1447	MSMEG_1447
-0.230143	10.8916	0.23671	0.626597	0.885435	MSMEG_1477	MSMEG_1477
-0.229693	8.67006	0.117511	0.731753	0.94498	MSMEG_2553	MSMEG_2553
-0.229083	6.79196	0.0521741	0.819324	0.976971	edd	MSMEG_0313
-0.228764	6.14565	0.0136665	0.906937	1	MSMEG_4555	MSMEG_4555
-0.227418	6.22866	0.0374079	0.846638	0.987575	MSMEG_1116	MSMEG_1116
-0.227193	5.11255	0.0127563	0.910076	1	MSMEG_5578	MSMEG_5578
-0.225303	5.16191	0.0124491	0.911161	1	MSMEG_6047	MSMEG_6047
-0.224984	8.69315	0.110348	0.739751	0.947743	MSMEG_3661	MSMEG_3661
-0.224323	6.67455	0.0236425	0.877799	0.992697	MSMEG_2773	MSMEG_2773
-0.223948	7.15075	0.0554861	0.81378	0.973676	MSMEG_5068	MSMEG_5068
-0.22368	5.20819	0.0121917	0.912081	1	MSMEG_1625	MSMEG_1625
-0.223612	5.21024	0.012181	0.912119	1	MSMEG_1941	MSMEG_1941
-0.223264	6.73995	0.0539739	0.816289	0.974775	MSMEG_0350	MSMEG_0350
-0.221864	5.26622	0.0119117	0.913092	1	thiE	MSMEG_0789
-0.221509	7.87763	0.0703854	0.790779	0.965719	rnpA	MSMEG_6945
-0.221044	6.3678	0.0308992	0.860467	0.987575	MSMEG_1361	MSMEG_1361
-0.220835	6.42702	0.0135539	0.90732	1	mmsA	MSMEG_1498
-0.220614	8.09804	0.0771564	0.781191	0.962381	gnd	MSMEG_3632
-0.21955	5.3572	0.0115716	0.914337	1	MSMEG_2650	MSMEG_2650
-0.219515	5.09303	0.0229411	0.879612	0.993209	MSMEG_3932	MSMEG_3932
-0.218888	7.77381	0.0737598	0.785941	0.962487	MSMEG_0383	MSMEG_0383
-0.218498	5.41186	0.0114271	0.914871	1	MSMEG_6016	MSMEG_6016
-0.21784	11.8472	0.211568	0.645546	0.895181	MSMEG_1886	MSMEG_1886
-0.217129	5.62377	0.0113168	0.915282	1	MSMEG_5343	MSMEG_5343
-0.214924	6.25213	0.0310632	0.860101	0.987575	ftsW	MSMEG_4228
-0.214318	6.03802	0.0169904	0.896293	0.999523	MSMEG_2357	MSMEG_2357
-0.211759	8.06836	0.0775665	0.780625	0.962381	MSMEG_5242	MSMEG_5242
-0.209686	6.55964	0.0199557	0.887662	0.996549	catA	MSMEG_1911
-0.209681	7.00678	0.0285675	0.865783	0.988372	MSMEG_0108	MSMEG_0108
-0.209467	8.04037	0.0481187	0.826372	0.980528	pheT	MSMEG_3777
-0.207527	10.5154	0.187378	0.665112	0.905158	rplX	MSMEG_1466
-0.207166	4.98784	0.0168878	0.896605	0.999523	MSMEG_6779	MSMEG_6779
-0.207039	7.54653	0.0582353	0.809309	0.970858	MSMEG_0940	MSMEG_0940
-0.206986	8.80138	0.100454	0.751289	0.952617	MSMEG_6275	MSMEG_6275
-0.206257	8.19297	0.0741066	0.785451	0.962381	MSMEG_0392	MSMEG_0392
-0.206036	7.90455	0.0581512	0.809444	0.970858	hpt	MSMEG_6110
-0.205857	7.39985	0.0457739	0.830589	0.982753	MSMEG_0025	MSMEG_0025
-0.201919	4.60263	0.0116603	0.91401	1	MSMEG_6503	MSMEG_6503
-0.201485	9.17655	0.123647	0.725116	0.939829	MSMEG_5243	MSMEG_5243
-0.201433	9.23263	0.124322	0.724396	0.939664	glnA	MSMEG_4294
-0.199657	6.32211	0.0168069	0.896851	0.999523	MSMEG_0660	MSMEG_0660
-0.199187	6.7581	0.0360523	0.849409	0.987575	MSMEG_4620	MSMEG_4620
-0.198162	6.58402	0.0337299	0.854284	0.987575	MSMEG_3908	MSMEG_3908
-0.197922	5.61499	0.00928256	0.923247	1	MSMEG_6267	MSMEG_6267
-0.197911	6.34633	0.0215905	0.883183	0.993657	MSMEG_1776	MSMEG_1776
-0.197626	4.77806	0.0107772	0.917319	1	MSMEG_1816	MSMEG_1816
-0.197248	6.84403	0.0445114	0.832907	0.984799	MSMEG_3357	MSMEG_3357
-0.196654	7.8523	0.0629992	0.801819	0.969257	MSMEG_6881	MSMEG_6881
-0.195216	6.75769	0.0347316	0.852161	0.987575	MSMEG_4904	MSMEG_4904
-0.194995	8.8703	0.0878658	0.766911	0.956662	MSMEG_4256	MSMEG_4256
-0.192828	5.26177	0.0136098	0.90713	1	MSMEG_2470	MSMEG_2470
-0.192737	5.92018	0.014008	0.905787	1	MSMEG_4744	MSMEG_4744
-0.192281	7.21534	0.0292175	0.864279	0.987575	MSMEG_1130	MSMEG_1130
-0.191947	5.28528	0.0134279	0.90775	1	MSMEG_4849	MSMEG_4849
-0.190788	9.1234	0.104255	0.746784	0.951335	MSMEG_1885	MSMEG_1885
-0.190432	6.81404	0.043136	0.835471	0.985987	MSMEG_1478	MSMEG_1478
-0.189921	8.92552	0.094074	0.759063	0.954973	MSMEG_1744	MSMEG_1744
-0.189136	8.43587	0.0716718	0.78892	0.964969	MSMEG_4087	MSMEG_4087
-0.188003	6.59907	0.027806	0.867567	0.988696	MSMEG_5329	MSMEG_5329
-0.18713	4.86853	0.0095443	0.922175	1	tilS	MSMEG_6111
-0.187006	7.18578	0.046708	0.828896	0.981949	MSMEG_5966	MSMEG_5966
-0.186992	7.86885	0.0562728	0.812489	0.972606	trx	MSMEG_3138
-0.186432	5.55631	0.012402	0.911328	1	MSMEG_6228	MSMEG_6228
-0.186303	5.92343	0.0202328	0.88689	0.996255	MSMEG_5125	MSMEG_5125
-0.183847	6.94516	0.0373391	0.846778	0.987575	nudC	MSMEG_1946
-0.181403	6.82195	0.0308061	0.860675	0.987575	MSMEG_4702	MSMEG_4702
-0.181288	7.57506	0.0393779	0.842704	0.987575	MSMEG_1600	MSMEG_1600
-0.180874	5.54989	0.0141671	0.905256	1	MSMEG_1497	MSMEG_1497
-0.177782	6.60024	0.0221893	0.881586	0.993271	MSMEG_3451	MSMEG_3451
-0.174816	6.67749	0.0314499	0.859242	0.987575	MSMEG_5259	MSMEG_5259
-0.174662	10.2653	0.12821	0.720298	0.937538	clpP	MSMEG_4673
-0.169921	10.3028	0.120953	0.728006	0.942102	MSMEG_0408	MSMEG_0408
-0.169686	9.35522	0.0926004	0.7609	0.954995	MSMEG_0390	MSMEG_0390
-0.168357	7.86417	0.0445041	0.83292	0.984799	MSMEG_5830	MSMEG_5830
-0.167221	6.32278	0.0175214	0.894694	0.999523	MSMEG_2035	MSMEG_2035
-0.16531	7.85171	0.033164	0.855498	0.987575	MSMEG_4142	MSMEG_4142
-0.165048	7.00414	0.0368836	0.847704	0.987575	nadA	MSMEG_3199
-0.162873	7.3726	0.0259647	0.871988	0.990264	MSMEG_6363	MSMEG_6363
-0.16237	5.48546	0.0115915	0.914263	1	gltX	MSMEG_6306
-0.162187	7.06729	0.0233469	0.87856	0.99274	MSMEG_1945	MSMEG_1945
-0.160414	8.56811	0.0512478	0.820908	0.977195	MSMEG_5059	MSMEG_5059
-0.159681	6.16004	0.0148321	0.903069	1	MSMEG_3513	MSMEG_3513
-0.158878	6.6851	0.0256338	0.872799	0.990614	MSMEG_3992	MSMEG_3992
-0.158847	9.19371	0.0704928	0.790623	0.965719	MSMEG_6082	MSMEG_6082
-0.158614	7.20416	0.0313565	0.859449	0.987575	MSMEG_2410	MSMEG_2410
-0.158563	8.24843	0.0443904	0.833131	0.98481	MSMEG_5072	MSMEG_5072
-0.158465	10.7605	0.111995	0.737888	0.947031	MSMEG_1254	MSMEG_1254
-0.157869	5.64481	0.00861397	0.926054	1	MSMEG_4196	MSMEG_4196
-0.156331	5.8822	0.0110336	0.916344	1	MSMEG_4914	MSMEG_4914
-0.155837	5.76729	0.0085399	0.926372	1	MSMEG_3961	MSMEG_3961
-0.155171	8.97277	0.0661367	0.797049	0.968224	MSMEG_1937	MSMEG_1937
-0.153588	8.36725	0.0354268	0.850706	0.987575	MSMEG_0946	MSMEG_0946
-0.152523	8.30952	0.0413711	0.838825	0.987411	MSMEG_1875	MSMEG_1875
-0.15234	5.21965	0.0061464	0.937511	1	MSMEG_5433	MSMEG_5433
-0.151416	7.0068	0.0238707	0.877216	0.992697	folE	MSMEG_6104
-0.151306	6.95165	0.0277476	0.867705	0.988696	MSMEG_0491	MSMEG_0491
-0.149983	6.43765	0.0202014	0.886977	0.996255	MSMEG_1165	MSMEG_1165
-0.149878	7.75034	0.0360393	0.849436	0.987575	MSMEG_3933	MSMEG_3933
-0.149494	7.2891	0.0178043	0.893852	0.999523	MSMEG_5431	MSMEG_5431
-0.148271	6.01463	0.0107717	0.917339	1	MSMEG_6411	MSMEG_6411
-0.148206	6.86283	0.0234189	0.878374	0.99274	MSMEG_0022	MSMEG_0022
-0.144902	4.72462	0.00626727	0.936901	1	MSMEG_5604	MSMEG_5604
-0.144746	8.10937	0.0352589	0.851056	0.987575	MSMEG_0266	MSMEG_0266
-0.144439	5.33805	0.00551467	0.940803	1	MSMEG_1649	MSMEG_1649
-0.14423	9.14727	0.0589984	0.808088	0.970735	MSMEG_0736	MSMEG_0736
-0.143193	7.72534	0.0267103	0.870179	0.989405	MSMEG_6285	MSMEG_6285
-0.142257	8.64777	0.0474009	0.827651	0.981172	MSMEG_5732	MSMEG_5732
-0.142179	6.09729	0.012855	0.90973	1	MSMEG_0454	MSMEG_0454
-0.142164	6.21502	0.0135996	0.907164	1	MSMEG_4130	MSMEG_4130
-0.141606	8.27346	0.0357536	0.850027	0.987575	MSMEG_3019	MSMEG_3019
-0.141171	7.75257	0.0249998	0.874369	0.991248	sppA	MSMEG_1476
-0.140509	7.34854	0.0263085	0.871151	0.989889	MSMEG_6145	MSMEG_6145
-0.139482	9.98628	0.0764922	0.782111	0.962381	MSMEG_4626	MSMEG_4626
-0.139026	5.46567	0.00511832	0.942967	1	MSMEG_3430	MSMEG_3430
-0.138844	5.47227	0.00510588	0.943036	1	MSMEG_2205	MSMEG_2205
-0.138235	7.64714	0.0228119	0.879949	0.993209	MSMEG_6116	MSMEG_6116
-0.13807	4.90187	0.00539932	0.941425	1	MSMEG_6273	MSMEG_6273
-0.137303	6.68123	0.0134714	0.907601	1	ackA	MSMEG_0784
-0.137273	6.88927	0.0195655	0.888759	0.996727	MSMEG_2010	MSMEG_2010
-0.136864	11.3384	0.0835102	0.772598	0.957751	MSMEG_0642	MSMEG_0642
-0.135684	4.58084	0.00587081	0.938925	1	MSMEG_2157	MSMEG_2157
-0.135385	8.00937	0.0244128	0.87584	0.992228	MSMEG_2839	MSMEG_2839
-0.133803	6.51858	0.0139717	0.905909	1	MSMEG_4284	MSMEG_4284
-0.133079	5.13716	0.00476143	0.944988	1	MSMEG_6805	MSMEG_6805
-0.132547	8.30045	0.0326956	0.856511	0.987575	MSMEG_0915	MSMEG_0915
-0.131809	6.92857	0.0207626	0.885429	0.995042	MSMEG_4029	MSMEG_4029
-0.131011	8.13085	0.0292986	0.864093	0.987575	MSMEG_1848	MSMEG_1848
-0.126798	6.45482	0.0132492	0.908363	1	MSMEG_1938	MSMEG_1938
-0.126288	8.53972	0.0280759	0.866932	0.988696	MSMEG_0688	MSMEG_0688
-0.125536	5.21891	0.00422208	0.948192	1	MSMEG_5987	MSMEG_5987
-0.124305	7.09408	0.0167929	0.896894	0.999523	MSMEG_6430	MSMEG_6430
-0.124182	5.59256	0.00681106	0.934227	1	MSMEG_5213	MSMEG_5213
-0.123408	7.75672	0.0227011	0.880238	0.993232	MSMEG_1281	MSMEG_1281
-0.121412	7.2312	0.0213023	0.88396	0.994303	MSMEG_4041	MSMEG_4041
-0.121045	8.65955	0.028147	0.866765	0.988696	lepB	MSMEG_2441
-0.120147	7.79331	0.0218654	0.882447	0.993285	MSMEG_6203	MSMEG_6203
-0.119875	6.08397	0.00671669	0.934683	1	nhaA	MSMEG_2775
-0.119453	7.62581	0.0201506	0.887119	0.996255	MSMEG_0842	MSMEG_0842
-0.118904	6.97143	0.0122948	0.911711	1	MSMEG_2779	MSMEG_2779
-0.11813	8.90918	0.0357723	0.849988	0.987575	MSMEG_2782	MSMEG_2782
-0.117932	6.28121	0.00947774	0.922446	1	MSMEG_2500	MSMEG_2500
-0.117443	5.40598	0.0052345	0.942324	1	MSMEG_2261	MSMEG_2261
-0.116565	7.17282	0.016182	0.898776	0.999523	carA	MSMEG_3046
-0.116363	7.03986	0.0107063	0.91759	1	MSMEG_2366	MSMEG_2366
-0.11561	5.45643	0.00506194	0.943281	1	MSMEG_6031	MSMEG_6031
-0.115013	9.25855	0.0404688	0.840568	0.987411	pcrA	MSMEG_5534
-0.114394	6.55396	0.00932292	0.92308	1	MSMEG_6058	MSMEG_6058
-0.114257	6.53534	0.00903765	0.924263	1	MSMEG_6395	MSMEG_6395
-0.113835	7.27199	0.017513	0.894719	0.999523	MSMEG_2346	MSMEG_2346
-0.113261	9.7925	0.0474136	0.827628	0.981172	MSMEG_1238	MSMEG_1238
-0.113124	7.02566	0.0169801	0.896324	0.999523	trx	MSMEG_6934
-0.112794	11.3089	0.0563413	0.812377	0.972606	MSMEG_3689	MSMEG_3689
-0.112196	7.63578	0.0176424	0.894333	0.999523	MSMEG_4220	MSMEG_4220
-0.109624	9.93527	0.0487313	0.825288	0.979792	rplN	MSMEG_1465
-0.106733	9.33994	0.0373658	0.846724	0.987575	MSMEG_6130	MSMEG_6130
-0.105877	11.2121	0.0490833	0.824668	0.979293	MSMEG_3058	MSMEG_3058
-0.105756	9.72845	0.0405525	0.840406	0.987411	tsf	MSMEG_2520
-0.105484	6.9655	0.0129641	0.90935	1	MSMEG_3858	MSMEG_3858
-0.103988	4.97039	0.0032889	0.954268	1	MSMEG_6140	MSMEG_6140
-0.100938	6.62078	0.00705838	0.933046	1	MSMEG_1383	MSMEG_1383
-0.100325	4.72459	0.00337611	0.953666	1	MSMEG_4064	MSMEG_4064
-0.0987205	5.33012	0.00161196	0.967975	1	MSMEG_5255	MSMEG_5255
-0.0985642	9.22487	0.0269722	0.86955	0.989405	MSMEG_3197	MSMEG_3197
-0.0982197	8.24796	0.0163616	0.898219	0.999523	MSMEG_4233	MSMEG_4233
-0.0973648	8.83195	0.0234433	0.878311	0.99274	MSMEG_1255	MSMEG_1255
-0.0963774	7.45536	0.0130201	0.909155	1	MSMEG_0636	MSMEG_0636
-0.09427	6.55774	0.00525176	0.942229	1	MSMEG_6512	MSMEG_6512
-0.0934218	6.76165	0.008702	0.925678	1	MSMEG_5871	MSMEG_5871
-0.0926101	11.5008	0.0380654	0.845313	0.987575	rplP	MSMEG_1443
-0.0906291	8.68286	0.017301	0.895355	0.999523	yajC	MSMEG_2960
-0.0904208	6.69723	0.00793218	0.929033	1	fxsA	MSMEG_3862
-0.0903899	7.97403	0.012056	0.912569	1	metZ	MSMEG_0769
-0.0895296	5.07215	0.00248772	0.960221	1	MSMEG_5649	MSMEG_5649
-0.0891583	6.4487	0.00648155	0.935834	1	MSMEG_0450	MSMEG_0450
-0.0888193	8.26607	0.0136993	0.906826	1	MSMEG_1296	MSMEG_1296
-0.0885567	8.6065	0.0170504	0.896111	0.999523	MSMEG_5270	MSMEG_5270
-0.0867424	8.54853	0.0158498	0.899815	0.999523	MSMEG_4042	MSMEG_4042
-0.0796367	11.0461	0.0279825	0.867151	0.988696	rpsG	MSMEG_1399
-0.078834	6.37217	0.00399186	0.949623	1	MSMEG_1068	MSMEG_1068
-0.0774547	6.20746	0.00283008	0.957574	1	ribH	MSMEG_3073
-0.0773279	6.34216	0.00518973	0.942571	1	MSMEG_3680	MSMEG_3680
-0.0764648	12.4129	0.0254201	0.873326	0.990842	MSMEG_4262	MSMEG_4262
-0.0746213	6.79789	0.00657423	0.935378	1	MSMEG_2595	MSMEG_2595
-0.0739059	6.56199	0.00369841	0.951507	1	MSMEG_6183	MSMEG_6183
-0.0734032	6.08224	0.00248932	0.960208	1	MSMEG_4299	MSMEG_4299
-0.0717401	6.88729	0.00314406	0.955285	1	MSMEG_6452	MSMEG_6452
-0.0685777	5.27335	0.00160008	0.968093	1	MSMEG_0697	MSMEG_0697
-0.0669216	6.13353	0.00145265	0.969597	1	MSMEG_0693	MSMEG_0693
-0.0667272	6.03711	0.00213884	0.963113	1	MSMEG_5170	MSMEG_5170
-0.0656399	8.47449	0.00843243	0.926835	1	MSMEG_6583	MSMEG_6583
-0.0653155	5.42198	0.00195921	0.964695	1	MSMEG_5353	MSMEG_5353
-0.0648331	4.6919	0.00172971	0.966826	1	MSMEG_4514	MSMEG_4514
-0.0646825	5.71236	0.00235652	0.961283	1	MSMEG_2672	MSMEG_2672
-0.0640456	6.96461	0.00269171	0.958623	1	ruvC	MSMEG_2943
-0.0627546	5.57865	0.00211997	0.963276	1	MSMEG_3953	MSMEG_3953
-0.0620012	8.8885	0.00973579	0.921401	1	MSMEG_4044	MSMEG_4044
-0.0614782	6.27445	0.00243699	0.960628	1	MSMEG_1176	MSMEG_1176
-0.0614263	5.00055	0.00119038	0.972477	1	MSMEG_1983	MSMEG_1983
-0.0611686	9.64351	0.0134949	0.907521	1	MSMEG_4111	MSMEG_4111
-0.0604208	8.47063	0.00722935	0.932242	1	MSMEG_3228	MSMEG_3228
-0.0573523	14.3942	0.0128801	0.909643	1	MSMEG_0643	MSMEG_0643
-0.0563948	8.99802	0.00855978	0.926286	1	MSMEG_4891	MSMEG_4891
-0.0560359	5.9927	0.00173386	0.966786	1	folP	MSMEG_5085
-0.0556651	9.47275	0.010686	0.917668	1	ispG	MSMEG_2580
-0.0548063	7.26558	0.00296611	0.956568	1	MSMEG_2417	MSMEG_2417
-0.0535331	5.52238	0.00101994	0.974523	1	MSMEG_5868	MSMEG_5868
-0.0523881	8.05604	0.00358305	0.952269	1	MSMEG_0973	MSMEG_0973
-0.0516431	5.0563	0.000327376	0.985564	1	dapF	MSMEG_2735
-0.0512922	11.385	0.0117628	0.913634	1	MSMEG_4268	MSMEG_4268
-0.0503873	8.25268	0.00444073	0.94687	1	MSMEG_3662	MSMEG_3662
-0.0493434	9.01707	0.00638671	0.936304	1	MSMEG_6900	MSMEG_6900
-0.049046	10.3568	0.0102878	0.919211	1	mqo	MSMEG_2613
-0.0475959	10.4037	0.00966959	0.921668	1	tal	MSMEG_3102
-0.0471051	5.39574	0.000777335	0.977758	1	MSMEG_0778	MSMEG_0778
-0.0470582	8.82722	0.00556323	0.940544	1	MSMEG_1424	MSMEG_1424
-0.0469372	4.95126	0.000972934	0.975117	1	MSMEG_5614	MSMEG_5614
-0.0465085	7.31422	0.00219153	0.962662	1	map	MSMEG_2587
-0.0456105	5.23012	0.000748381	0.978176	1	MSMEG_2805	MSMEG_2805
-0.0446317	6.04537	0.000759451	0.978015	1	MSMEG_6481	MSMEG_6481
-0.0445396	8.76498	0.004378	0.947246	1	coaBC	MSMEG_3054
-0.0419962	6.58323	0.00181286	0.966039	1	MSMEG_1240	MSMEG_1240
-0.0416139	6.22603	0.00107962	0.973788	1	MSMEG_5452	MSMEG_5452
-0.0411051	8.49192	0.00319055	0.954956	1	phoU	MSMEG_5776
-0.0380041	6.32484	0.000960541	0.975276	1	MSMEG_4463	MSMEG_4463
-0.0375082	11.5958	0.00620993	0.93719	1	rplE	MSMEG_1467
-0.0357183	4.98574	0.000108245	0.991699	1	MSMEG_3083	MSMEG_3083
-0.0334845	6.59461	0.00137074	0.970467	1	MSMEG_3931	MSMEG_3931
-0.0323476	7.58965	0.00130999	0.971128	1	MSMEG_1652	MSMEG_1652
-0.031527	6.79307	0.000965323	0.975214	1	MSMEG_4340	MSMEG_4340
-0.0310099	6.03991	0.000428534	0.983484	1	MSMEG_4188	MSMEG_4188
-0.0309093	6.36754	0.000761501	0.977985	1	MSMEG_4557	MSMEG_4557
-0.0284929	6.89742	0.000441116	0.983244	1	MSMEG_0858	MSMEG_0858
-0.0261007	5.77685	0.000434711	0.983366	1	MSMEG_6178	MSMEG_6178
-0.0250102	7.50723	0.000705224	0.978814	1	pgm	MSMEG_2136
-0.0243894	10.1181	0.00247882	0.960292	1	grpE	MSMEG_0710
-0.0237446	7.34483	0.000713488	0.97869	1	MSMEG_4703	MSMEG_4703
-0.02343	6.71735	0.000280476	0.986638	1	MSMEG_0941	MSMEG_0941
-0.0230388	5.9598	0.000394745	0.984149	1	MSMEG_6490	MSMEG_6490
-0.022719	8.64915	0.00107594	0.973833	1	MSMEG_4495	MSMEG_4495
-0.0182929	8.83141	0.000712896	0.978699	1	MSMEG_4940	MSMEG_4940
-0.0158392	6.38915	0.000164963	0.989753	1	MSMEG_6722	MSMEG_6722
-0.0139254	7.16162	0.000256112	0.987232	1	MSMEG_5956	MSMEG_5956
-0.0133481	8.31986	0.000299475	0.986193	1	ispH	MSMEG_5224
-0.0125766	9.46303	0.000513277	0.981925	1	secD	MSMEG_2961
-0.0124937	7.69655	0.000203948	0.988606	1	ftsE	MSMEG_2089
-0.0120052	6.4849	6.52e-05	0.993557	1	MSMEG_4934	MSMEG_4934
-0.0111918	5.13061	0.000192102	0.988942	1	MSMEG_5642	MSMEG_5642
-0.0111828	9.24457	0.000359865	0.984865	1	MSMEG_6077	MSMEG_6077
-0.0109794	8.21834	0.000221461	0.988127	1	MSMEG_1211	MSMEG_1211
-0.0079133	6.49847	3.06e-05	0.995586	1	ribF	MSMEG_2653
-0.00720537	7.92479	7.76e-05	0.99297	1	MSMEG_6195	MSMEG_6195
-0.0064457	7.91154	6.07e-05	0.993781	1	MSMEG_5275	MSMEG_5275
-0.00625208	7.71959	5.18e-05	0.994256	1	MSMEG_6406	MSMEG_6406
-0.00621054	9.76611	0.000133208	0.990791	1	typA	MSMEG_5132
-0.00489185	12.4585	0.000103225	0.991894	1	MSMEG_0381	MSMEG_0381
-0.00465641	6.94649	4.36e-05	0.994732	1	menB	MSMEG_4114
-0.00444865	9.50525	5.91e-05	0.993868	1	MSMEG_5775	MSMEG_5775
-0.00420077	6.21328	2.12e-05	0.996329	1	MSMEG_3391	MSMEG_3391
-0.00419068	5.86538	4.28e-06	0.998349	1	MSMEG_1184	MSMEG_1184
-0.00396827	5.82385	3.2e-05	0.995487	1	MSMEG_1574	MSMEG_1574
-0.00357945	6.03672	9.76e-06	0.997507	1	MSMEG_1970	MSMEG_1970
-0.00224213	5.18383	9.23e-05	0.992337	1	MSMEG_6475	MSMEG_6475
-0.00199107	7.0525	1.36e-05	0.997055	1	MSMEG_1428	MSMEG_1428
-0.00119818	7.903	1.07e-05	0.997393	1	MSMEG_0938	MSMEG_0938
-0.000905148	6.93569	3.95e-06	0.998415	1	MSMEG_4342	MSMEG_4342
0	4.63501	0	1	1	MSMEG_1063	MSMEG_1063
0	4.35069	0	1	1	MSMEG_1096	MSMEG_1096
0	4.76089	0	1	1	MSMEG_0012	MSMEG_0012
0	4.6794	0	1	1	MSMEG_1121	MSMEG_1121
0	4.91524	0	1	1	MSMEG_1139	MSMEG_1139
0	4.76857	0	1	1	MSMEG_1168	MSMEG_1168
0	5.51312	0	1	1	MSMEG_1175	MSMEG_1175
0	5.25237	0	1	1	MSMEG_1213	MSMEG_1213
0	4.88072	0	1	1	MSMEG_0126	MSMEG_0126
0	4.63866	0	1	1	MSMEG_1294	MSMEG_1294
0	4.9887	0	1	1	MSMEG_1332	MSMEG_1332
0	4.52546	0	1	1	MSMEG_1362	MSMEG_1362
0	5.41013	0	1	1	MSMEG_1373	MSMEG_1373
0	4.53295	0	1	1	MSMEG_1405	MSMEG_1405
0	4.70467	0	1	1	MSMEG_1411	MSMEG_1411
0	4.72205	0	1	1	MSMEG_1430	MSMEG_1430
0	4.40743	0	1	1	MSMEG_0016	MSMEG_0016
0	4.35069	0	1	1	panE	MSMEG_0153
0	4.71531	0	1	1	MSMEG_1536	MSMEG_1536
0	4.48217	0	1	1	MSMEG_1544	MSMEG_1544
[truncated: 2,903 more rows]

## Sheet: Legend
LogFC: log2 fold change of strain 1 compared to strain 2 in tab label (e.g. FDL10_mc2155)
logCPM: Average log2 counts per million, the averages taken over all libraries
F = F statistic
P_value: uncorrected p-value
FDR: False discovery rate (corrected p-values for multiple comparisons)
locus_tag: systematic surrogate gene identifier for protein coding and non-coding genes
