# Supplementary material for: Comparative transcriptomics reveals PrrAB-mediated control of metabolic, respiration, energy-generating, and dormancy pathways in Mycobacterium smegmatis
Source: BMC Genomics. 2019 Dec 7;20:942. doi: 10.1186/s12864-019-6105-3 (PMC6898941; doi:10.1186/s12864-019-6105-3)
Supplement: Supplementary file 3 — Additional file 3. DAVID gene ontology results from significant DEGs. [file 12864_2019_6105_MOESM3_ESM.xlsx]

## Sheet: Induced by PrrAB_q<0.05
Category	Term	Count	%	PValue	Genes	List Total	Pop Hits	Pop Total	Fold Enrichment	Bonferroni	Benjamini	FDR
GOTERM_BP_ALL	GO:0006950~response to stress	6	6.31579	0.0122126	4535567, 4535796, 4537312, 4537708, 4537230, 4533041	34	102	2367	4.09516	0.934643	0.934643	14.4991
GOTERM_BP_ALL	GO:0006629~lipid metabolic process	6	6.31579	0.0197714	4533953, 4531933, 4535468, 4533780, 4534107, 4531966	34	115	2367	3.63223	0.988124	0.891022	22.475
GOTERM_BP_ALL	GO:0008610~lipid biosynthetic process	5	5.26316	0.0198245	4533953, 4535468, 4533780, 4534107, 4531966	34	76	2367	4.58011	0.988266	0.772761	22.5285
GOTERM_BP_ALL	GO:0050896~response to stimulus	7	7.36842	0.0402577	4535487, 4535567, 4535796, 4537312, 4537708, 4537230, 4533041	34	186	2367	2.62002	0.999891	0.897769	40.7746
GOTERM_MF_DIRECT	GO:0004096~catalase activity	3	3.15789	0.00934223	4531149, 4534109, 4537344	58	11	4167	19.594	0.419808	0.419808	8.91582
GOTERM_MF_DIRECT	GO:0016491~oxidoreductase activity	9	9.47368	0.0111877	4533553, 4537739, 4533165, 4534315, 4535468, 4533715, 4536091, 4537453, 4533575	58	227	4167	2.84847	0.47928	0.278391	10.59
GOTERM_MF_DIRECT	GO:0033748~hydrogenase (acceptor) activity	2	2.10526	0.0404875	4531215, 4533521	58	3	4167	47.8966	0.909022	0.550242	33.715
GOTERM_MF_DIRECT	GO:0008901~ferredoxin hydrogenase activity	2	2.10526	0.0404875	4531215, 4533521	58	3	4167	47.8966	0.909022	0.550242	33.715
GOTERM_MF_DIRECT	GO:0004315~3-oxoacyl-[acyl-carrier-protein] synthase activity	2	2.10526	0.0793634	4535995, 4531966	58	6	4167	23.9483	0.991737	0.698506	56.0761
GOTERM_MF_DIRECT	GO:0008825~cyclopropane-fatty-acyl-phospholipid synthase activity	2	2.10526	0.0919749	4533953, 4533780	58	7	4167	20.5271	0.996287	0.673461	61.7086
KEGG_PATHWAY	msm00633:Nitrotoluene degradation	2	2.10526	0.0417679	4531215, 4533521	14	5	1532	43.7714	0.670209	0.670209	29.5233
KEGG_PATHWAY	msm01120:Microbial metabolism in diverse environments	7	7.36842	0.0709053	4532802, 4535508, 4537739, 4531215, 4530926, 4533521, 4537128	14	373	1532	2.05362	0.852239	0.615603	45.29

## Sheet: Repressed by PrrAB_q<0.05
Category	Term	Count	%	PValue	Genes	List Total	Pop Hits	Pop Total	Fold Enrichment	Bonferroni	Benjamini	FDR
GOTERM_BP_ALL	GO:0006536~glutamate metabolic process	3	4.16667	0.0136995	4537412, 4536818, 4534175	32	14	2367	15.8504	0.97653	0.97653	16.6045
GOTERM_BP_ALL	GO:0031640~killing of cells of other organism	2	2.77778	0.0513987	4533718, 4533136	32	4	2367	36.9844	0.999999	0.999235	50.0716
GOTERM_BP_ALL	GO:0035821~modification of morphology or physiology of other organism	2	2.77778	0.0513987	4533718, 4533136	32	4	2367	36.9844	0.999999	0.999235	50.0716
GOTERM_BP_ALL	GO:0001906~cell killing	2	2.77778	0.0513987	4533718, 4533136	32	4	2367	36.9844	0.999999	0.999235	50.0716
GOTERM_BP_ALL	GO:0051715~cytolysis in other organism	2	2.77778	0.0513987	4533718, 4533136	32	4	2367	36.9844	0.999999	0.999235	50.0716
GOTERM_BP_ALL	GO:0044364~disruption of cells of other organism	2	2.77778	0.0513987	4533718, 4533136	32	4	2367	36.9844	0.999999	0.999235	50.0716
GOTERM_BP_ALL	GO:0019835~cytolysis	2	2.77778	0.0638434	4533718, 4533136	32	5	2367	29.5875	1	0.997475	58.0382
GOTERM_BP_ALL	GO:0044764~multi-organism cellular process	2	2.77778	0.0638434	4533718, 4533136	32	5	2367	29.5875	1	0.997475	58.0382
GOTERM_BP_ALL	GO:0006537~glutamate biosynthetic process	2	2.77778	0.0882604	4537412, 4534175	32	7	2367	21.1339	1	0.998133	70.3673
GOTERM_MF_ALL	GO:0047516~1,3-propanediol dehydrogenase activity	2	2.77778	0.0248052	4536493, 4535294	53	2	4167	78.6226	0.982908	0.982908	26.2096
GOTERM_MF_ALL	GO:0004022~alcohol dehydrogenase (NAD) activity	3	4.16667	0.0251432	4535822, 4536493, 4534538	53	20	4167	11.7934	0.983841	0.872882	26.5184
GOTERM_MF_ALL	GO:0022829~wide pore channel activity	2	2.77778	0.0490067	4533718, 4533136	53	4	4167	39.3113	0.999708	0.93369	45.5577
GOTERM_MF_ALL	GO:0015288~porin activity	2	2.77778	0.0490067	4533718, 4533136	53	4	4167	39.3113	0.999708	0.93369	45.5577
GOTERM_MF_ALL	GO:0001883~purine nucleoside binding	10	13.8889	0.0763052	4532549, 4537673, 4535301, 4535212, 4535068, 4533200, 4533338, 4534101, 4535346, 4535575	53	424	4167	1.85431	0.999997	0.95983	61.7283
GOTERM_MF_ALL	GO:0035639~purine ribonucleoside triphosphate binding	10	13.8889	0.0763052	4532549, 4537673, 4535301, 4535212, 4535068, 4533200, 4533338, 4534101, 4535346, 4535575	53	424	4167	1.85431	0.999997	0.95983	61.7283
GOTERM_MF_ALL	GO:0032550~purine ribonucleoside binding	10	13.8889	0.0763052	4532549, 4537673, 4535301, 4535212, 4535068, 4533200, 4533338, 4534101, 4535346, 4535575	53	424	4167	1.85431	0.999997	0.95983	61.7283
GOTERM_MF_ALL	GO:0032555~purine ribonucleotide binding	10	13.8889	0.0763052	4532549, 4537673, 4535301, 4535212, 4535068, 4533200, 4533338, 4534101, 4535346, 4535575	53	424	4167	1.85431	0.999997	0.95983	61.7283
GOTERM_MF_ALL	GO:0016638~oxidoreductase activity, acting on the CH-NH2 group of donors	3	4.16667	0.0771166	4537412, 4536818, 4534175	53	37	4167	6.37481	0.999998	0.925739	62.1331
GOTERM_MF_ALL	GO:0017076~purine nucleotide binding	10	13.8889	0.0772094	4532549, 4537673, 4535301, 4535212, 4535068, 4533200, 4533338, 4534101, 4535346, 4535575	53	425	4167	1.84994	0.999998	0.885769	62.1792
GOTERM_MF_ALL	GO:0032549~ribonucleoside binding	10	13.8889	0.0772094	4532549, 4537673, 4535301, 4535212, 4535068, 4533200, 4533338, 4534101, 4535346, 4535575	53	425	4167	1.84994	0.999998	0.885769	62.1792
GOTERM_MF_ALL	GO:0001882~nucleoside binding	10	13.8889	0.0772094	4532549, 4537673, 4535301, 4535212, 4535068, 4533200, 4533338, 4534101, 4535346, 4535575	53	425	4167	1.84994	0.999998	0.885769	62.1792
GOTERM_MF_ALL	GO:0004658~propionyl-CoA carboxylase activity	2	2.77778	0.0956557	4535868, 4536218	53	8	4167	19.6557	1	0.902402	70.3778
GOTERM_MF_ALL	GO:0016639~oxidoreductase activity, acting on the CH-NH2 group of donors, NAD or NADP as acceptor	2	2.77778	0.0956557	4537412, 4536818	53	8	4167	19.6557	1	0.902402	70.3778
KEGG_PATHWAY	msm01200:Carbon metabolism	6	8.33333	0.080634	4535822, 4535301, 4533025, 4536493, 4534455, 4536218	23	166	1532	2.40754	0.970724	0.970724	54.0711

## Sheet: Induced by PrrAB_p<0.05
Category	Term	Count	%	PValue	Genes	List Total	Pop Hits	Pop Total	Fold Enrichment	Bonferroni	Benjamini	FDR
GOTERM_BP_5	GO:0006873~cellular ion homeostasis	3	1.20482	0.0236864	4532688, 4537312, 4532622	65	7	1784	11.7626	0.986631	0.986631	25.5667
GOTERM_BP_5	GO:0055082~cellular chemical homeostasis	3	1.20482	0.0236864	4532688, 4537312, 4532622	65	7	1784	11.7626	0.986631	0.986631	25.5667
GOTERM_BP_5	GO:0050801~ion homeostasis	3	1.20482	0.0387696	4532688, 4537312, 4532622	65	9	1784	9.14872	0.999189	0.971524	38.5562
GOTERM_BP_5	GO:0046364~monosaccharide biosynthetic process	3	1.20482	0.0565682	4532802, 4533162, 4534481	65	11	1784	7.48531	0.999972	0.969617	51.1913
GOTERM_MF_3	GO:0004096~catalase activity	4	1.60643	0.00649539	4531149, 4534109, 4536096, 4537344	133	11	3582	9.79357	0.362145	0.362145	6.50315
GOTERM_MF_3	GO:0016722~oxidoreductase activity, oxidizing metal ions	3	1.20482	0.012528	4532688, 4537312, 4532622	133	5	3582	16.1594	0.581002	0.352699	12.1982
GOTERM_MF_3	GO:0016705~oxidoreductase activity, acting on paired donors, with incorporation or reduction of molecular oxygen	13	5.22088	0.0241777	4531373, 4533884, 4531417, 4533038, 4531773, 4531933, 4536609, 4536200, 4531905, 4535111, 4534037, 4536652, 4533662	133	173	3582	2.02382	0.815252	0.430457	22.3181
GOTERM_MF_3	GO:0051536~iron-sulfur cluster binding	9	3.61446	0.0598222	4534013, 4536230, 4532525, 4534630, 4534481, 4533521, 4536484, 4534895, 4537735	133	115	3582	2.10775	0.985826	0.654958	47.087
GOTERM_MF_3	GO:0016684~oxidoreductase activity, acting on peroxide as acceptor	5	2.00803	0.071893	4531149, 4534109, 4532347, 4536096, 4537344	133	43	3582	3.13167	0.994189	0.642848	53.6921
KEGG_PATHWAY	msm00190:Oxidative phosphorylation	6	2.40964	0.0174975	4532360, 4533165, 4535511, 4536091, 4532726, 4537735	52	48	1573	3.78125	0.693552	0.693552	16.5605
KEGG_PATHWAY	msm00625:Chloroalkane and chloroalkene degradation	4	1.60643	0.0648685	4536066, 4537739, 4532907, 4532965	52	29	1573	4.17241	0.988819	0.894261	49.7355
KEGG_PATHWAY	msm03018:RNA degradation	3	1.20482	0.0926117	4532040, 4530985, 4532726	52	16	1573	5.67188	0.998514	0.885875	63.0926

## Sheet: Repressed by PrrAB_p<0.05
Category	Term	Count	%	PValue	Genes	List Total	Pop Hits	Pop Total	Fold Enrichment	Bonferroni	Benjamini	FDR
GOTERM_BP_3	GO:1901564~organonitrogen compound metabolic process	68	16.1905	7.04509e-07	4530828, 4535223, 4536818, 4534444, 4531292, 4536887, 4535790, 4536223, 4536396, 4532486, 4534682, 4535694, 4534609, 4537412, 4534913, 4532947, 4532080, 4532649, 4537513, 4531258, 4532868, 4534511, 4536133, 4534102, 4532694, 4533091, 4531470, 4537673, 4533234, 4532952, 4534451, 4533235, 4536899, 4536683, 4537630, 4537269, 4537529, 4535809, 4535014, 4534375, 4533495, 4534724, 4535783, 4535341, 453…	167	487	2033	1.69981	7.7493e-05	7.7493e-05	0.000795969
GOTERM_BP_3	GO:0044281~small molecule metabolic process	68	16.1905	1.23344e-05	4530828, 4532403, 4535223, 4534306, 4536818, 4531292, 4535790, 4536223, 4536396, 4537556, 4533025, 4534682, 4535694, 4537412, 4532947, 4534913, 4532080, 4532649, 4535886, 4532868, 4534511, 4533152, 4532103, 4536133, 4532694, 4532653, 4531869, 4531470, 4537673, 4532952, 4534451, 4533235, 4536899, 4536683, 4537630, 4535210, 4537269, 4537529, 4535809, 4537463, 4534375, 4534724, 4535783, 4535341, 453…	167	524	2033	1.57979	0.00135587	0.000678165	0.0139348
GOTERM_BP_3	GO:1901135~carbohydrate derivative metabolic process	28	6.66667	0.000192996	4533117, 4533495, 4534724, 4535783, 4533585, 4536396, 4534475, 4537539, 4532947, 4532080, 4535043, 4535575, 4532868, 4531281, 4531344, 4531280, 4532694, 4537673, 4534451, 4533235, 4537247, 4536899, 4532985, 4537529, 4537728, 4530882, 4535809, 4531413	167	164	2033	2.07843	0.0210078	0.00705223	0.217835
GOTERM_BP_3	GO:0044711~single-organism biosynthetic process	51	12.1429	0.000327034	4532403, 4530828, 4534306, 4535223, 4531292, 4535694, 4533939, 4537412, 4532947, 4534913, 4532080, 4532649, 4534511, 4532868, 4533152, 4532103, 4534102, 4532694, 4532653, 4531869, 4531470, 4537673, 4533234, 4534451, 4533235, 4536899, 4536683, 4537630, 4537529, 4537269, 4535210, 4535809, 4534375, 4534724, 4535783, 4537239, 4534475, 4536674, 4534175, 4535043, 4532700, 4533720, 4532741, 4533415, 453…	167	393	2033	1.57979	0.03534	0.00895457	0.368869
GOTERM_BP_3	GO:0055086~nucleobase-containing small molecule metabolic process	22	5.2381	0.000812383	4532868, 4534375, 4533152, 4534724, 4531281, 4531280, 4535783, 4532694, 4537673, 4533235, 4536396, 4536899, 4534475, 4532985, 4534682, 4537529, 4537728, 4532947, 4532080, 4535809, 4531413, 4535043	167	125	2033	2.14256	0.0855189	0.0177208	0.914021
GOTERM_BP_3	GO:0019637~organophosphate metabolic process	26	6.19048	0.00114293	4532403, 4534375, 4534724, 4535783, 4533585, 4536396, 4534475, 4533939, 4534682, 4532947, 4535043, 4535575, 4532868, 4533152, 4531281, 4531280, 4537673, 4534451, 4536259, 4533235, 4536899, 4532985, 4537529, 4537728, 4535809, 4531413	167	164	2033	1.92997	0.118204	0.0207475	1.28374
GOTERM_BP_3	GO:0044249~cellular biosynthetic process	107	25.4762	0.00123897	4530828, 4532403, 4533117, 4534306, 4533114, 4537552, 4534444, 4533445, 4536887, 4532486, 4534609, 4533939, 4537412, 4532947, 4532080, 4531448, 4531258, 4532103, 4534102, 4532694, 4532961, 4532952, 4533234, 4534451, 4533235, 4536899, 4536683, 4531060, 4537630, 4531064, 4535809, 4533082, 4536004, 4533495, 4535783, 4537239, 4537539, 4532998, 4536624, 4535043, 4531753, 4532880, 4536215, 4533415, 453…	167	1065	2033	1.22308	0.127481	0.0192931	1.39093
GOTERM_BP_3	GO:0006793~phosphorus metabolic process	27	6.42857	0.00173501	4532403, 4534375, 4534724, 4535783, 4533585, 4536396, 4534475, 4534682, 4533939, 4532947, 4535043, 4535575, 4532868, 4533152, 4531281, 4531280, 4533765, 4537673, 4534451, 4536259, 4533235, 4536899, 4532985, 4537529, 4537728, 4535809, 4531413	167	178	2033	1.84657	0.173881	0.0235943	1.94284
GOTERM_BP_3	GO:1901576~organic substance biosynthetic process	105	25	0.00776757	4530828, 4532403, 4533117, 4534306, 4533114, 4537552, 4534444, 4533445, 4536887, 4532486, 4534609, 4533939, 4537412, 4532947, 4532080, 4531448, 4531258, 4532103, 4534102, 4532694, 4532961, 4532952, 4533234, 4534451, 4533235, 4536899, 4536683, 4531060, 4537630, 4531064, 4535809, 4536004, 4533495, 4535783, 4537239, 4537539, 4532998, 4536624, 4535043, 4531753, 4532880, 4536215, 4533415, 4535770, 453…	167	1086	2033	1.17701	0.575893	0.0909068	8.43331
GOTERM_BP_3	GO:0019538~protein metabolic process	21	5	0.0124474	4533117, 4533606, 4532880, 4536215, 4534724, 4534444, 4534102, 4535341, 4536887, 4535790, 4532952, 4536259, 4533252, 4532486, 4531404, 4534609, 4532570, 4535210, 4534875, 4535014, 4537151	167	146	2033	1.751	0.747868	0.12871	13.1959
GOTERM_BP_3	GO:0051128~regulation of cellular component organization	6	1.42857	0.0193108	4536887, 4536004, 4537247, 4533495, 4537539, 4530882	167	20	2033	3.6521	0.882928	0.177163	19.7732
GOTERM_BP_3	GO:0051186~cofactor metabolic process	16	3.80952	0.0521991	4533082, 4534375, 4534306, 4534724, 4533765, 4531344, 4534102, 4531869, 4533234, 4536396, 4535924, 4536259, 4537239, 4537529, 4535210, 4531258	167	118	2033	1.65066	0.997253	0.388251	45.4312
GOTERM_BP_3	GO:0006790~sulfur compound metabolic process	8	1.90476	0.0621432	4530828, 4533091, 4534451, 4533082, 4533861, 4531344, 4531292, 4537513	167	44	2033	2.21339	0.999139	0.418925	51.5614
GOTERM_BP_3	GO:0042440~pigment metabolic process	4	0.952381	0.0679772	4533234, 4537239, 4537728, 4534102	167	12	2033	4.05788	0.999567	0.424852	54.8588
GOTERM_MF_3	GO:0001882~nucleoside binding	50	11.9048	0.000849899	4530828, 4531211, 4532773, 4537216, 4536887, 4532549, 4535790, 4531404, 4532486, 4535068, 4534682, 4532947, 4533200, 4533937, 4532099, 4536642, 4532101, 4533606, 4532293, 4535212, 4536847, 4534101, 4536891, 4537673, 4532952, 4533235, 4532916, 4532911, 4536899, 4531721, 4537529, 4533338, 4534375, 4535346, 4535341, 4535810, 4530890, 4535575, 4532880, 4536215, 4537246, 4531281, 4532222, 4531280, 453…	268	425	3582	1.57243	0.065759	0.065759	0.899853
GOTERM_MF_3	GO:0032553~ribonucleotide binding	52	12.381	0.00360365	4530828, 4531211, 4532773, 4536887, 4537216, 4532549, 4535790, 4531404, 4532486, 4534682, 4535068, 4532947, 4533200, 4533937, 4532099, 4536642, 4532101, 4533606, 4532293, 4535212, 4536847, 4534101, 4536891, 4535755, 4537673, 4532952, 4533235, 4532916, 4532911, 4536899, 4531721, 4537529, 4533338, 4534375, 4535346, 4535341, 4535810, 4530890, 4535575, 4532880, 4536215, 4537062, 4537246, 4531281, 453…	268	477	3582	1.45705	0.250847	0.134464	3.7653
GOTERM_MF_3	GO:1901682~sulfur compound transmembrane transporter activity	5	1.19048	0.0331285	4532099, 4537329, 4535623, 4533200, 4535842	268	17	3582	3.93108	0.932469	0.592776	30.1039
GOTERM_MF_3	GO:1901265~nucleoside phosphate binding	64	15.2381	0.0652801	4530828, 4531211, 4534501, 4532773, 4536887, 4537216, 4532549, 4535790, 4533025, 4533772, 4532486, 4537741, 4531404, 4534682, 4535068, 4532947, 4533200, 4533937, 4536597, 4532099, 4536642, 4535886, 4533606, 4532101, 4532293, 4535212, 4536173, 4536847, 4536891, 4534101, 4535755, 4537673, 4532952, 4533235, 4532916, 4532911, 4536899, 4531721, 4537529, 4533338, 4535049, 4534375, 4535346, 4535341, 453…	268	710	3582	1.20479	0.995486	0.740803	51.2123
GOTERM_MF_3	GO:0000166~nucleotide binding	64	15.2381	0.0652801	4530828, 4531211, 4534501, 4532773, 4536887, 4537216, 4532549, 4535790, 4533025, 4533772, 4532486, 4537741, 4531404, 4534682, 4535068, 4532947, 4533200, 4533937, 4536597, 4532099, 4536642, 4535886, 4533606, 4532101, 4532293, 4535212, 4536173, 4536847, 4536891, 4534101, 4535755, 4537673, 4532952, 4533235, 4532916, 4532911, 4536899, 4531721, 4537529, 4533338, 4535049, 4534375, 4535346, 4535341, 453…	268	710	3582	1.20479	0.995486	0.740803	51.2123
GOTERM_MF_3	GO:0016875~ligase activity, forming carbon-oxygen bonds	5	1.19048	0.0761405	4535341, 4535790, 4532952, 4532880, 4536215	268	22	3582	3.03765	0.998228	0.718359	56.9125
GOTERM_MF_3	GO:0017171~serine hydrolase activity	6	1.42857	0.0763369	4533606, 4535475, 4531404, 4531324, 4531254, 4532927	268	31	3582	2.5869	0.998258	0.653118	57.0098
KEGG_PATHWAY	msm00640:Propanoate metabolism	15	3.57143	0.0126952	4535218, 4536499, 4536666, 4535294, 4534455, 4533410, 4536218, 4534545, 4535810, 4533853, 4536223, 4535301, 4535040, 4536597, 4530890	147	80	1573	2.00638	0.699104	0.699104	13.0778
KEGG_PATHWAY	msm01110:Biosynthesis of secondary metabolites	46	10.9524	0.0536406	4536499, 4535223, 4534306, 4533585, 4535810, 4533853, 4536396, 4533025, 4537239, 4534475, 4533366, 4535694, 4533939, 4537412, 4536025, 4532947, 4535040, 4536597, 4532649, 4530890, 4531258, 4534175, 4535043, 4534511, 4533720, 4532741, 4533415, 4531281, 4531280, 4534102, 4534455, 4531869, 4531470, 4535301, 4534451, 4533234, 4535822, 4533235, 4536899, 4537548, 4533264, 4536683, 4537630, 4537728, 453…	147	392	1573	1.25569	0.994386	0.925073	45.3817
KEGG_PATHWAY	msm00280:Valine, leucine and isoleucine degradation	13	3.09524	0.0601827	4535218, 4536499, 4536666, 4532175, 4534455, 4533410, 4536218, 4534545, 4533853, 4536223, 4535301, 4535040, 4536597	147	80	1573	1.73886	0.997075	0.856992	49.3838
KEGG_PATHWAY	msm01130:Biosynthesis of antibiotics	36	8.57143	0.0760819	4532403, 4536499, 4535223, 4535810, 4533853, 4536396, 4533025, 4534475, 4535479, 4530997, 4537412, 4532947, 4535040, 4536597, 4532649, 4530890, 4535043, 4534175, 4534511, 4533720, 4532741, 4533415, 4531281, 4531280, 4534455, 4536218, 4531470, 4535301, 4534451, 4535822, 4533235, 4536899, 4533264, 4537548, 4537728, 4531413	147	301	1573	1.27982	0.999412	0.844265	58.0238
KEGG_PATHWAY	msm02010:ABC transporters	24	5.71429	0.0828301	4532099, 4536642, 4532293, 4531942, 4534303, 4533108, 4532777, 4537246, 4535842, 4537245, 4534712, 4534293, 4533591, 4535800, 4537574, 4533696, 4535097, 4537025, 4535623, 4533861, 4531031, 4533200, 4536573, 4534877	147	186	1573	1.38073	0.999705	0.803186	61.2672
