# Supplementary material for: Comparative transcriptomics reveals PrrAB-mediated control of metabolic, respiration, energy-generating, and dormancy pathways in Mycobacterium smegmatis
Source: BMC Genomics. 2019 Dec 7;20:942. doi: 10.1186/s12864-019-6105-3 (PMC6898941; doi:10.1186/s12864-019-6105-3)
Supplement: Supplementary file 4 — Additional file 4. DosR regulon DEG and comparison of genes betweeen M. smegmatis and M. tuberculosis. [file 12864_2019_6105_MOESM4_ESM.xlsx]

## Sheet: DosR Regulon
Gene		In DEG List?	>1 Rv Homlogues? (#)	mc2155:FDL10			FDL15:FDL10			mc2155:FDL15
H37Rv	mc2155			RNA-Seq FC	q Value	p Value	RNA-Seq FC	q Value	p Value	RNA-Seq FC	q Value	p Value
Rv0079	MSMEG_3935	Yes	No	1.4577	0.3708	0.054466	1.88222	0.1694	0.0057501	-0.424516	0.8745	0.58554
Rv0080	MSMEG_5136	Yes	No	-0.903507	0.507	0.136326	-0.286539	0.8662	0.570764	-0.616968	0.7631	0.320188
Rv0081	MSMEG_6451	Yes	No	-4.25631	0.5413	0.174456	-0.578636	0.9032	0.668484	-3.67767	0.7631	0.289016
Rv0082	-	-	-	-	-	-	-	-	-	-	-	-
Rv0083	-	-	-	-	-	-	-	-	-	-	-	-
Rv0569	-	-	-	-	-	-	-	-	-	-	-	-
Rv0570	-	-	-	-	-	-	-	-	-	-	-	-
Rv0571c	-	-	-	-	-	-	-	-	-	-	-	-
Rv0572c	-	-	-	-	-	-	-	-	-	-	-	-
Rv0574c	-	-	-	-	-	-	-	-	-	-	-	-
MT0639	-	-	-	-	-	-	-	-	-	-	-	-
Rv1733c	MSMEG_1738	Yes	No	-1.03793	0.3992	0.0640907	-0.789589	0.5133	0.0961008	-0.248344	0.9043	0.662764
	MSMEG_6676	Yes	No	1.25609	0.6626	0.369235	-1.50605	0.7502	0.332612	2.76214	0.7086	0.130173
Rv1734c	-	-	-	-	-	-	-	-	-	-	-	-
Rv1736c	-	-	-	-	-	-	-	-	-	-	-	-
Rv1737c	MSMEG_5141	No	No	-	-	-	-	-	-	-	-	-
Rv1738	-	-	-	-	-	-	-	-	-	-	-	-
Rv1812c	-	-	-	-	-	-	-	-	-	-	-	-
Rv18123c	-	-	-	-	-	-	-	-	-	-	-	-
Rv1996	MSMEG_3945	Yes	Yes (3)	6.36043	1.46e-08	1.19e-11	5.86867	7.44e-08	4.9e-11	0.491759	0.8393	0.512475
Rv1997	MSMEG_3926	Yes	No	4.67186	3.47e-06	1.13e-08	3.06268	0.0107	9.35e-05	1.60919	0.6209	0.0390146
Rv2003c	-	-	-	-	-	-	-	-	-	-	-	-
Rv2004c	MSMEG_3942	Yes	No	2.7582	5.55e-05	2.72e-07	1.90807	0.0118	0.000108401	0.850135	0.7086	0.109265
Rv2005c	MSMEG_3945	Yes	Yes (3)	6.36043	1.46e-08	1.19e-11	5.86867	7.44e-08	4.9e-11	0.491759	0.8393	0.512475
Rv2006	MSMEG_3954	Yes	No	4.8312	8.39e-08	1.54e-10	3.42064	0.0003	1.26e-06	1.41056	0.6229	0.0397707
Rv2007c	MSMEG_1124	No	No	-	-	-	-	-	-	-	-	-
Rv2028c	MSMEG_5245	Yes	Yes (2)	1.24857	0.1321	0.00734496	0.825669	0.426	0.0506648	0.4229	0.8019	0.371162
Rv2029c	MSMEG_3947	Yes	No	2.66447	0.4942	0.124116	4.20807	0.0693	0.00113042	-1.5436	0.7631	0.317551
Rv2030c	-	-	-	-	-	-	-	-	-	-	-	-
Rv2031c	MSMEG_3932	Yes	No	3.15534	0.3428	0.0423743	2.93582	0.362	0.0307248	0.219515	0.9932	0.879612
Rv2032	MSMEG_3943	Yes	No	2.30454	0.068	0.00270629	2.78811	0.0076	5.9e-05	-0.483562	0.8499	0.526716
	MSMEG_5246	Yes	No	0.954458	0.3697	0.0530952	0.310073	0.8363	0.485815	0.644385	0.7271	0.201313
Rv2623	MSMEG_3945	Yes	Yes (3)	6.36043	1.46e-08	1.19e-11	5.86867	7.44e-08	4.9e-11	0.491759	0.8393	0.512475
Rv2624c	MSMEG_3939	Yes	No	3.39758	0.0063	0.000108497	2.87672	0.0287	0.000327536	0.520859	0.8547	0.535915
Rv2625c	-	-	-	-	-	-	-	-	-	-	-	-
Rv2626c	-	-	-	-	-	-	-	-	-	-	-	-
Rv2627c	-	-	-	-	-	-	-	-	-	-	-	-
Rv2628	-	-	-	-	-	-	-	-	-	-	-	-
Rv2629	-	-	-	-	-	-	-	-	-	-	-	-
Rv2630	-	-	-	-	-	-	-	-	-	-	-	-
Rv2631	-	-	-	-	-	-	-	-	-	-	-	-
Rv2830c	-	-	-	-	-	-	-	-	-	-	-	-
Rv3126c	-	-	-	-	-	-	-	-	-	-	-	-
Rv3127	-	-	-	-	-	-	-	-	-	-	-	-
Rv3128c	-	-	-	-	-	-	-	-	-	-	-	-
Rv3129	MSMEG_6368	Yes	No	-4.75117	0.4925	0.123109	0.52726	0.8985	0.651408	-5.27843	0.6967	0.0849412
Rv3130c	MSMEG_3948	Yes	No	3.35598	0.0006	6.22e-06	2.90525	0.0034	2.31e-05	0.450732	0.8512	0.528144
	MSMEG_5242	Yes	No	1.18894	0.476	0.107299	0.977177	0.5741	0.13951	0.211759	0.9624	0.780625
Rv3131	MSMEG_3955	Yes	No	0.156127	0.9702	0.914622	1.94643	0.456	0.0645878	-1.7903	0.7271	0.226341
Rv3132c	MSMEG_5241	Yes	No	0.335688	0.8555	0.667577	1.20754	0.456	0.0656253	-0.871856	0.7631	0.278041
Rv3133c	MSMEG_3944	Yes	No	5.09779	1.06e-06	3.01e-09	4.54484	8.83e-06	2.16e-08	0.552955	0.8178	0.468186
	MSMEG_5244	Yes	No	1.06311	0.2474	0.0218417	0.613973	0.5756	0.143648	0.449139	0.7695	0.340463
Rv3134c	MSMEG_5245	Yes	Yes (2)	1.24857	0.1321	0.00734496	0.825669	0.426	0.0506648	0.4229	0.8019	0.371162
Rv3841	MSMEG_6422	Yes	No	1.25352	0.1291	0.00705864	0.804051	0.4405	0.0551502	0.449467	0.7695	0.33944

## Sheet: Summary
Mtb DosR Regulon (Park, 2003) = 50 genes
26 Mtb genes have no homologue in M. smegmatis
2 MSMEG homologues are not in the RNA-Seq DEG list (MSMEG 1124 & MSMEG 5141)
MSMEG 3945 maps to three separate Mtb homologues (Rv1996, Rv2005c, & Rv2623)
MSMEG 5245 maps to two separate Mtb homologues (Rv2028c & Rv3134c)
Four Mtb genes map to two Msmeg homologues
	Rv1733c --> MSMEG 1738 & MSMEG 6676
	Rv2032 --> MSMEG 3943 & MSMEG 5246
	Rv3130 --> MSMEG 3948 & MSMEG 5242
	Rv3133c --> MSMEG 3944 & MSMEG 5244
23 MSMEG homologues differentially expressed (<-2 or > 2) in any pairwise comparison among three strains; 10 of which were statistically significant (q < 0.05)
Note that all fold change values represent values in wild-type (mc2155) or complentation strain (FDL15) relative to the prrAB mutant (FDL10)
	Fold change values between mc2155 and FDL15 represent the values in mc2155 relative to FDL15
