# Supplementary material for: Comparative transcriptomics reveals PrrAB-mediated control of metabolic, respiration, energy-generating, and dormancy pathways in Mycobacterium smegmatis
Source: BMC Genomics. 2019 Dec 7;20:942. doi: 10.1186/s12864-019-6105-3 (PMC6898941; doi:10.1186/s12864-019-6105-3)
Supplement: Supplementary file 6 — Additional file 6. DAVID gene ontology results from overlapping DEGs between mc2155 vs. FDL10 and FDL15 vs. FDL10 data sets. [file 12864_2019_6105_MOESM6_ESM.xlsx]

## Sheet: DAVID AllOverlap_qValues
Category	Term	Count	%	PValue	Genes	List Total	Pop Hits	Pop Total	Fold Enrichment	Bonferroni	Benjamini	FDR
GOTERM_BP_ALL	GO:0050896~response to stimulus	6	9.23077	0.0718795	4534600, 4533772, 4535487, 4535567, 4537312, 4537708	30	186	2367	2.54516	1	1	61.8907
GOTERM_MF_ALL	GO:0004315~3-oxoacyl-[acyl-carrier-protein] synthase activity	2	3.07692	0.05489	4535995, 4531966	40	6	4167	34.725	0.99967	0.99967	48.7143
KEGG_PATHWAY	msm00190:Oxidative phosphorylation	3	4.61538	0.06632	4533025, 4533165, 4535783	15	47	1532	6.51915	0.779018	0.779018	41.5533

## Sheet: DAVID AllOverlap_pValues
Category	Term	Count	%	PValue	Genes	List Total	Pop Hits	Pop Total	Fold Enrichment	Bonferroni	Benjamini	FDR
COG_ONTOLOGY	Transcription	31	5.50622	0.0795762	4532280, 4535047, 4536811, 4531960, 4533114, 4535207, 4531212, 4535473, 4535958, 4533254, 4531483, 4535782, 4532549, 4531462, 4535187, 4536972, 4530857, 4534230, 4533373, 4530853, 4532366, 4534317, 4536368, 4531797, 4533599, 4532865, 4535333, 4535610, 4536617, 4532912, 4535732	143	254	1536	1.31094	0.916893	0.916893	50.6562
GOTERM_BP_ALL	GO:0015672~monovalent inorganic cation transport	6	1.06572	0.00150505	4531820, 4537316, 4537218, 4532985, 4535783, 4536303	235	10	2367	6.0434	0.630494	0.630494	2.22878
GOTERM_BP_ALL	GO:0015992~proton transport	5	0.888099	0.00473108	4531820, 4537316, 4532985, 4535783, 4536303	235	8	2367	6.29521	0.956486	0.791399	6.85083
GOTERM_BP_ALL	GO:0006818~hydrogen transport	5	0.888099	0.00473108	4531820, 4537316, 4532985, 4535783, 4536303	235	8	2367	6.29521	0.956486	0.791399	6.85083
GOTERM_BP_ALL	GO:0015986~ATP synthesis coupled proton transport	5	0.888099	0.00473108	4531820, 4537316, 4532985, 4535783, 4536303	235	8	2367	6.29521	0.956486	0.791399	6.85083
GOTERM_BP_ALL	GO:0015985~energy coupled proton transport, down electrochemical gradient	5	0.888099	0.00473108	4531820, 4537316, 4532985, 4535783, 4536303	235	8	2367	6.29521	0.956486	0.791399	6.85083
GOTERM_BP_ALL	GO:0006754~ATP biosynthetic process	5	0.888099	0.00473108	4531820, 4537316, 4532985, 4535783, 4536303	235	8	2367	6.29521	0.956486	0.791399	6.85083
GOTERM_BP_ALL	GO:1902600~hydrogen ion transmembrane transport	5	0.888099	0.00473108	4531820, 4537316, 4532985, 4535783, 4536303	235	8	2367	6.29521	0.956486	0.791399	6.85083
GOTERM_BP_ALL	GO:0006811~ion transport	12	2.13144	0.00676122	4533310, 4531143, 4531820, 4533398, 4537316, 4537218, 4532985, 4534975, 4531382, 4535783, 4536303, 4533136	235	49	2367	2.4667	0.988716	0.775703	9.65409
GOTERM_BP_ALL	GO:0006629~lipid metabolic process	21	3.73002	0.00743225	4531638, 4532403, 4532700, 4536132, 4536746, 4531933, 4532256, 4536134, 4533780, 4531966, 4534107, 4537099, 4532175, 4532653, 4532816, 4535468, 4531542, 4533939, 4531236, 4536957, 4531233	235	115	2367	1.8393	0.992781	0.708515	10.5632
GOTERM_BP_ALL	GO:0098662~inorganic cation transmembrane transport	5	0.888099	0.00786152	4531820, 4537316, 4532985, 4535783, 4536303	235	9	2367	5.59574	0.994576	0.647745	11.1403
GOTERM_BP_ALL	GO:0098655~cation transmembrane transport	5	0.888099	0.00786152	4531820, 4537316, 4532985, 4535783, 4536303	235	9	2367	5.59574	0.994576	0.647745	11.1403
GOTERM_BP_ALL	GO:0009145~purine nucleoside triphosphate biosynthetic process	5	0.888099	0.00786152	4531820, 4537316, 4532985, 4535783, 4536303	235	9	2367	5.59574	0.994576	0.647745	11.1403
GOTERM_BP_ALL	GO:0009206~purine ribonucleoside triphosphate biosynthetic process	5	0.888099	0.00786152	4531820, 4537316, 4532985, 4535783, 4536303	235	9	2367	5.59574	0.994576	0.647745	11.1403
GOTERM_BP_ALL	GO:0098660~inorganic ion transmembrane transport	5	0.888099	0.0175622	4531820, 4537316, 4532985, 4535783, 4536303	235	11	2367	4.57834	0.999992	0.858005	23.291
GOTERM_BP_ALL	GO:0034220~ion transmembrane transport	5	0.888099	0.0175622	4531820, 4537316, 4532985, 4535783, 4536303	235	11	2367	4.57834	0.999992	0.858005	23.291
GOTERM_BP_ALL	GO:0009201~ribonucleoside triphosphate biosynthetic process	5	0.888099	0.0175622	4531820, 4537316, 4532985, 4535783, 4536303	235	11	2367	4.57834	0.999992	0.858005	23.291
GOTERM_BP_ALL	GO:0006812~cation transport	7	1.24334	0.0208946	4531820, 4537316, 4537218, 4532985, 4531382, 4535783, 4536303	235	23	2367	3.06549	0.999999	0.863843	27.0939
GOTERM_BP_ALL	GO:0008610~lipid biosynthetic process	14	2.48668	0.0324641	4532403, 4532653, 4532700, 4536132, 4532816, 4536746, 4535468, 4531542, 4536134, 4533939, 4533780, 4534107, 4531966, 4537099	235	76	2367	1.85543	1	0.934575	38.9747
GOTERM_BP_ALL	GO:0009142~nucleoside triphosphate biosynthetic process	5	0.888099	0.0324957	4531820, 4537316, 4532985, 4535783, 4536303	235	13	2367	3.87398	1	0.911634	39.0045
GOTERM_BP_ALL	GO:0043648~dicarboxylic acid metabolic process	10	1.7762	0.037061	4531915, 4535246, 4533415, 4532649, 4533422, 4536818, 4534098, 4535249, 4534175, 4532159	235	47	2367	2.14305	1	0.917609	43.1726
GOTERM_BP_ALL	GO:0046486~glycerolipid metabolic process	7	1.24334	0.037103	4536132, 4536134, 4531542, 4533939, 4534107, 4537099, 4531233	235	26	2367	2.71178	1	0.896891	43.2097
GOTERM_BP_ALL	GO:0044255~cellular lipid metabolic process	15	2.6643	0.0395165	4531638, 4532403, 4532700, 4536132, 4532256, 4536746, 4536134, 4531966, 4534107, 4537099, 4532653, 4531542, 4535468, 4533939, 4531233	235	86	2367	1.7568	1	0.891486	45.303
GOTERM_BP_ALL	GO:0006536~glutamate metabolic process	5	0.888099	0.0420616	4531915, 4532649, 4536818, 4534098, 4534175	235	14	2367	3.59726	1	0.887516	47.4322
GOTERM_BP_ALL	GO:0045017~glycerolipid biosynthetic process	4	0.71048	0.0866957	4531542, 4533939, 4534107, 4537099	235	11	2367	3.66267	1	0.986181	74.2595
GOTERM_CC_ALL	GO:0045259~proton-transporting ATP synthase complex	5	0.888099	0.00246193	4531820, 4537316, 4532985, 4535783, 4536303	142	8	1696	7.46479	0.158482	0.158482	2.51877
GOTERM_CC_ALL	GO:0016469~proton-transporting two-sector ATPase complex	5	0.888099	0.00246193	4531820, 4537316, 4532985, 4535783, 4536303	142	8	1696	7.46479	0.158482	0.158482	2.51877
GOTERM_CC_ALL	GO:0043234~protein complex	19	3.37478	0.00307471	4531143, 4532886, 4536132, 4537316, 4536343, 4535783, 4532726, 4533585, 4532653, 4534603, 4531820, 4535615, 4536359, 4532985, 4532570, 4531874, 4533521, 4536303, 4533136	142	110	1696	2.063	0.193911	0.102175	3.13672
GOTERM_CC_ALL	GO:0032991~macromolecular complex	25	4.4405	0.00533635	4532886, 4531143, 4536132, 4537316, 4536343, 4535783, 4534444, 4532726, 4533585, 4532653, 4534603, 4531820, 4536359, 4535615, 4532985, 4534609, 4534901, 4532570, 4537259, 4531875, 4533521, 4531874, 4536303, 4533307, 4533136	142	171	1696	1.74615	0.312398	0.117369	5.38693
GOTERM_CC_ALL	GO:0005622~intracellular	54	9.59147	0.0109454	4534041, 4535494, 4536811, 4535974, 4531059, 4537316, 4534444, 4532405, 4533585, 4534609, 4537259, 4531875, 4536492, 4537312, 4536498, 4533307, 4533330, 4536132, 4535212, 4532599, 4531120, 4536343, 4536891, 4534614, 4532653, 4531470, 4536388, 4531820, 4537670, 4535615, 4534901, 4536303, 4536448, 4535783, 4535435, 4531279, 4535813, 4536439, 4537539, 4534376, 4533521, 4534975, 4532880, 4534333, 453…	142	487	1696	1.32435	0.537174	0.175189	10.7653
GOTERM_CC_ALL	GO:0033178~proton-transporting two-sector ATPase complex, catalytic domain	3	0.53286	0.0368307	4537316, 4532985, 4536303	142	4	1696	8.95775	0.927693	0.408661	32.1834
GOTERM_CC_ALL	GO:0045261~proton-transporting ATP synthase complex, catalytic core F(1)	3	0.53286	0.0368307	4537316, 4532985, 4536303	142	4	1696	8.95775	0.927693	0.408661	32.1834
GOTERM_CC_ALL	GO:0098796~membrane protein complex	11	1.95382	0.0383649	4534603, 4531143, 4532886, 4531820, 4536359, 4537316, 4532985, 4531874, 4535783, 4536303, 4533136	142	65	1696	2.02124	0.935327	0.366441	33.2931
GOTERM_CC_ALL	GO:0044424~intracellular part	42	7.46004	0.0446688	4534041, 4535974, 4531059, 4537316, 4535783, 4534444, 4533585, 4531279, 4536439, 4537539, 4534609, 4537259, 4536492, 4531875, 4537312, 4534975, 4533521, 4536498, 4533307, 4533330, 4532880, 4534333, 4536132, 4535212, 4532599, 4531120, 4536343, 4536215, 4535339, 4531498, 4534614, 4532177, 4532653, 4531470, 4536259, 4531820, 4535615, 4532985, 4534901, 4532570, 4536923, 4536303	142	388	1696	1.29287	0.959189	0.366802	37.6824
GOTERM_MF_ALL	GO:0046933~proton-transporting ATP synthase activity, rotational mechanism	5	0.888099	0.00186889	4531820, 4537316, 4532985, 4535783, 4536303	379	7	4167	7.85337	0.613369	0.613369	2.66369
GOTERM_MF_ALL	GO:0044769~ATPase activity, coupled to transmembrane movement of ions, rotational mechanism	5	0.888099	0.00186889	4531820, 4537316, 4532985, 4535783, 4536303	379	7	4167	7.85337	0.613369	0.613369	2.66369
GOTERM_MF_ALL	GO:0016782~transferase activity, transferring sulfur-containing groups	8	1.42096	0.0397962	4536259, 4537401, 4533541, 4536482, 4533422, 4532798, 4531411, 4534916	379	36	4167	2.44327	1	0.999967	44.3507
GOTERM_MF_ALL	GO:0033608~formyl-CoA transferase activity	5	0.888099	0.0406555	4537401, 4533541, 4533422, 4532798, 4534916	379	15	4167	3.66491	1	0.999113	45.0652
GOTERM_MF_ALL	GO:0019829~cation-transporting ATPase activity	6	1.06572	0.0432797	4531820, 4537316, 4532985, 4536139, 4535783, 4536303	379	22	4167	2.99856	1	0.996372	47.1946
GOTERM_MF_ALL	GO:0022853~active ion transmembrane transporter activity	8	1.42096	0.0581146	4531211, 4531820, 4537316, 4532985, 4536139, 4533200, 4535783, 4536303	379	39	4167	2.25533	1	0.997719	57.857
GOTERM_MF_ALL	GO:0042625~ATPase coupled ion transmembrane transporter activity	8	1.42096	0.0581146	4531211, 4531820, 4537316, 4532985, 4536139, 4533200, 4535783, 4536303	379	39	4167	2.25533	1	0.997719	57.857
GOTERM_MF_ALL	GO:0015078~hydrogen ion transmembrane transporter activity	6	1.06572	0.0602245	4532360, 4531820, 4537316, 4532985, 4535783, 4536303	379	24	4167	2.74868	1	0.9948	59.1992
GOTERM_MF_ALL	GO:0004096~catalase activity	4	0.71048	0.0705668	4531149, 4534109, 4537344, 4534153	379	11	4167	3.99808	1	0.995062	65.2218
GOTERM_MF_ALL	GO:0016462~pyrophosphatase activity	30	5.3286	0.0922688	4531211, 4533116, 4531059, 4537316, 4533636, 4535783, 4533278, 4535346, 4535435, 4531279, 4534603, 4533200, 4531397, 4533830, 4534819, 4537468, 4534983, 4531143, 4532868, 4535212, 4536343, 4532761, 4531820, 4531491, 4532985, 4532570, 4531590, 4536139, 4536303, 4531243	379	249	4167	1.32467	1	0.997861	75.2705
GOTERM_MF_ALL	GO:0016818~hydrolase activity, acting on acid anhydrides, in phosphorus-containing anhydrides	30	5.3286	0.0958971	4531211, 4533116, 4531059, 4537316, 4533636, 4535783, 4533278, 4535346, 4535435, 4531279, 4534603, 4533200, 4531397, 4533830, 4534819, 4537468, 4534983, 4531143, 4532868, 4535212, 4536343, 4532761, 4531820, 4531491, 4532985, 4532570, 4531590, 4536139, 4536303, 4531243	379	250	4167	1.31937	1	0.996621	76.6594
GOTERM_MF_ALL	GO:0016817~hydrolase activity, acting on acid anhydrides	30	5.3286	0.099619	4531211, 4533116, 4531059, 4537316, 4533636, 4535783, 4533278, 4535346, 4535435, 4531279, 4534603, 4533200, 4531397, 4533830, 4534819, 4537468, 4534983, 4531143, 4532868, 4535212, 4536343, 4532761, 4531820, 4531491, 4532985, 4532570, 4531590, 4536139, 4536303, 4531243	379	251	4167	1.31411	1	0.99516	78.0085
KEGG_PATHWAY	msm00190:Oxidative phosphorylation	11	1.95382	0.00465659	4532360, 4531820, 4533025, 4533165, 4537316, 4532985, 4536091, 4535783, 4536303, 4532726, 4537735	131	47	1532	2.73705	0.336839	0.336839	4.92994
KEGG_PATHWAY	msm00650:Butanoate metabolism	12	2.13144	0.0552941	4535526, 4533243, 4536499, 4533025, 4535548, 4532256, 4536365, 4536774, 4532109, 4536641, 4534455, 4532175	131	77	1532	1.82254	0.9933	0.918144	45.9963
KEGG_PATHWAY	msm00052:Galactose metabolism	5	0.888099	0.0594698	4534052, 4532011, 4534841, 4534449, 4536564	131	18	1532	3.24852	0.995463	0.834448	48.5264

## Sheet: DAVID_UpRegOverlap_pValues
Category	Term	Count	%	PValue	Genes	List Total	Pop Hits	Pop Total	Fold Enrichment	Bonferroni	Benjamini	FDR
GOTERM_BP_ALL	GO:1901566~organonitrogen compound biosynthetic process	17	12.1429	0.0306979	4532868, 4533720, 4532880, 4536215, 4533415, 4533765, 4535783, 4534444, 4531470, 4537673, 4536259, 4537539, 4532985, 4534609, 4532649, 4534175, 4531258	64	373	2367	1.68561	0.999999	0.999999	35.6645
GOTERM_BP_ALL	GO:0006536~glutamate metabolic process	3	2.14286	0.0516564	4532649, 4536818, 4534175	64	14	2367	7.92522	1	0.999992	52.7767
GOTERM_BP_ALL	GO:0044249~cellular biosynthetic process	36	25.7143	0.0574478	4532403, 4535544, 4533117, 4536004, 4533114, 4531212, 4535207, 4535783, 4534444, 4530875, 4537539, 4534609, 4533939, 4534376, 4532649, 4533373, 4531258, 4534175, 4536725, 4532700, 4532868, 4532880, 4533720, 4536215, 4533415, 4531324, 4533765, 4532653, 4531470, 4537673, 4536259, 4535610, 4532985, 4532570, 4535732, 4531064	64	1065	2367	1.25018	1	0.999833	56.6964
GOTERM_BP_ALL	GO:0009058~biosynthetic process	37	26.4286	0.0737951	4532403, 4535544, 4533117, 4536004, 4533114, 4531212, 4535207, 4535783, 4534444, 4530875, 4537539, 4534609, 4533939, 4534376, 4532649, 4533373, 4531258, 4534175, 4531096, 4536725, 4532700, 4532868, 4532880, 4533720, 4536215, 4533415, 4531324, 4533765, 4532653, 4531470, 4537673, 4536259, 4535610, 4532985, 4532570, 4535732, 4531064	64	1121	2367	1.22072	1	0.999786	66.1906
GOTERM_BP_ALL	GO:1901576~organic substance biosynthetic process	36	25.7143	0.0760412	4532403, 4535544, 4533117, 4536004, 4533114, 4531212, 4535207, 4535783, 4534444, 4530875, 4537539, 4534609, 4533939, 4534376, 4532649, 4533373, 4531258, 4534175, 4536725, 4532700, 4532868, 4532880, 4533720, 4536215, 4533415, 4531324, 4533765, 4532653, 4531470, 4537673, 4536259, 4535610, 4532985, 4532570, 4535732, 4531064	64	1086	2367	1.226	1	0.999066	67.3321
GOTERM_BP_ALL	GO:0090407~organophosphate biosynthetic process	7	5	0.0770022	4532403, 4537673, 4536259, 4532868, 4532985, 4533939, 4535783	64	113	2367	2.29107	1	0.997231	67.8095
GOTERM_BP_ALL	GO:0006793~phosphorus metabolic process	9	6.42857	0.0962653	4532403, 4537673, 4536259, 4532868, 4532985, 4533939, 4535783, 4533765, 4533585	64	178	2367	1.87	1	0.998299	76.1134
GOTERM_CC_ALL	GO:0005622~intracellular	21	15	0.0123764	4533330, 4532880, 4535212, 4531120, 4532599, 4536215, 4536891, 4535783, 4534444, 4531498, 4533585, 4532653, 4531470, 4535813, 4536259, 4537670, 4532985, 4537539, 4534609, 4532570, 4534376	45	487	1696	1.62519	0.414627	0.414627	10.943
GOTERM_CC_ALL	GO:0044424~intracellular part	17	12.1429	0.0282557	4533330, 4532880, 4535212, 4532599, 4531120, 4536215, 4535783, 4534444, 4531498, 4533585, 4532653, 4531470, 4536259, 4532985, 4537539, 4534609, 4532570	45	388	1696	1.65132	0.708435	0.460032	23.4123
GOTERM_MF_ALL	GO:0000287~magnesium ion binding	8	5.71429	0.00610341	4532700, 4532101, 4532868, 4537556, 4532880, 4533720, 4531498, 4533548	102	91	4167	3.59147	0.818784	0.818784	7.77178
GOTERM_MF_ALL	GO:0016788~hydrolase activity, acting on ester bonds	10	7.14286	0.0130924	4531096, 4532570, 4531506, 4534376, 4533676, 4536957, 4531064, 4531498, 4534494, 4533548	102	157	4167	2.6021	0.974699	0.840937	15.9837
GOTERM_MF_ALL	GO:0052689~carboxylic ester hydrolase activity	5	3.57143	0.0152245	4531506, 4534376, 4533676, 4536957, 4531064	102	40	4167	5.10662	0.986161	0.759916	18.3509
GOTERM_MF_ALL	GO:0022804~active transmembrane transporter activity	8	5.71429	0.0441514	4531211, 4537329, 4537670, 4532985, 4533200, 4531382, 4535783, 4535346	102	135	4167	2.42092	0.999997	0.957131	44.9394
GOTERM_MF_ALL	GO:0016643~oxidoreductase activity, acting on the CH-NH2 group of donors, iron-sulfur protein as acceptor	2	1.42857	0.0478943	4532649, 4534175	102	2	4167	40.8529	0.999999	0.935341	47.7215
GOTERM_MF_ALL	GO:0016041~glutamate synthase (ferredoxin) activity	2	1.42857	0.0478943	4532649, 4534175	102	2	4167	40.8529	0.999999	0.935341	47.7215
GOTERM_MF_ALL	GO:0008173~RNA methyltransferase activity	3	2.14286	0.049751	4534120, 4531120, 4535198	102	15	4167	8.17059	0.999999	0.906795	49.0528
GOTERM_MF_ALL	GO:0022853~active ion transmembrane transporter activity	4	2.85714	0.0673811	4531211, 4532985, 4533200, 4535783	102	39	4167	4.19005	1	0.937985	60.2223
GOTERM_MF_ALL	GO:0042625~ATPase coupled ion transmembrane transporter activity	4	2.85714	0.0673811	4531211, 4532985, 4533200, 4535783	102	39	4167	4.19005	1	0.937985	60.2223
KEGG_PATHWAY	msm00280:Valine, leucine and isoleucine degradation	6	4.28571	0.0442899	4535218, 4535301, 4536499, 4534455, 4532175, 4536218	39	80	1532	2.94615	0.909367	0.909367	35.7235
KEGG_PATHWAY	msm00562:Inositol phosphate metabolism	3	2.14286	0.0513464	4535218, 4532403, 4537556	39	15	1532	7.85641	0.938806	0.752627	40.2069

## Sheet: DAVID_DownRegOverlap_pValues
Category	Term	Count	%	PValue	Genes	List Total	Pop Hits	Pop Total	Fold Enrichment	Bonferroni	Benjamini	FDR
GOTERM_BP_ALL	GO:0006629~lipid metabolic process	7	9.45946	0.00262835	4531933, 4535468, 4531542, 4533780, 4534107, 4531966, 4531236	31	115	2367	4.64769	0.357343	0.357343	3.15356
GOTERM_BP_ALL	GO:0008610~lipid biosynthetic process	5	6.75676	0.0142744	4535468, 4531542, 4533780, 4534107, 4531966	31	76	2367	5.02334	0.910666	0.701113	16.0584
GOTERM_BP_ALL	GO:0032787~monocarboxylic acid metabolic process	4	5.40541	0.0855824	4532802, 4535468, 4531966, 4537688	31	83	2367	3.67975	1	0.99333	66.3552
GOTERM_BP_ALL	GO:0044255~cellular lipid metabolic process	4	5.40541	0.0929575	4535468, 4531542, 4534107, 4531966	31	86	2367	3.55139	1	0.98339	69.5142
GOTERM_MF_ALL	GO:0004096~catalase activity	3	4.05405	0.00696359	4531149, 4534109, 4537344	50	11	4167	22.7291	0.661466	0.661466	8.04959
GOTERM_MF_ALL	GO:0004601~peroxidase activity	3	4.05405	0.0537178	4531149, 4534109, 4537344	50	32	4167	7.81312	0.999808	0.986145	48.4744
GOTERM_MF_ALL	GO:0004315~3-oxoacyl-[acyl-carrier-protein] synthase activity	2	2.7027	0.0685524	4535995, 4531966	50	6	4167	27.78	0.999983	0.974501	57.3801
GOTERM_MF_ALL	GO:0016491~oxidoreductase activity	19	25.6757	0.0818732	4532360, 4533553, 4533165, 4534109, 4531149, 4534315, 4531933, 4537344, 4533706, 4532689, 4537735, 4536089, 4531417, 4535468, 4536091, 4533521, 4537312, 4534087, 4533662	50	1118	4167	1.41633	0.999998	0.963484	64.1504
GOTERM_MF_ALL	GO:0016301~kinase activity	5	6.75676	0.0875702	4532802, 4536388, 4533278, 4537446, 4532726	50	144	4167	2.89375	0.999999	0.941631	66.7325
GOTERM_MF_ALL	GO:0016684~oxidoreductase activity, acting on peroxide as acceptor	3	4.05405	0.090213	4531149, 4534109, 4537344	50	43	4167	5.81442	1	0.913049	67.8714
KEGG_PATHWAY	msm00190:Oxidative phosphorylation	5	6.75676	0.00045462	4532360, 4533165, 4536091, 4532726, 4537735	14	47	1532	11.6413	0.0113037	0.0113037	0.368248
